# Supplementary material for: Sesquiterpenes From Oplopanax elatus Stems and Their Anti-Photoaging Effects by Down-Regulating Matrix Metalloproteinase-1 Expression via Anti-Inflammation
Source: Front Chem. 2021 Nov 4;9:766041. doi: 10.3389/fchem.2021.766041 (PMC8600134; doi:10.3389/fchem.2021.766041)
Supplement: Supplementary file 1 [file Table10.XLS]

## Sheet: 6-CONF_1_ecd
Entering Gaussian System, Link 0=g16
Input=CONF_1_ecd.com
Output=CONF_1_ecd.log
Initial command:
/public/apps/g16/l1.exe "scr.62.master/Gau-83286.inp" -scrdir="scr.62.master/"
Default is to use a total of 12 processors:
12 via shared-memory
1 via Linda
Entering Link 1 = /public/apps/g16/l1.exe PID= 83287.
Copyright (c) 1988-2019, Gaussian, Inc. All Rights Reserved.
This is part of the Gaussian(R) 16 program. It is based on
the Gaussian(R) 09 system (copyright 2009, Gaussian, Inc.),
the Gaussian(R) 03 system (copyright 2003, Gaussian, Inc.),
the Gaussian(R) 98 system (copyright 1998, Gaussian, Inc.),
the Gaussian(R) 94 system (copyright 1995, Gaussian, Inc.),
the Gaussian 92(TM) system (copyright 1992, Gaussian, Inc.),
the Gaussian 90(TM) system (copyright 1990, Gaussian, Inc.),
the Gaussian 88(TM) system (copyright 1988, Gaussian, Inc.),
the Gaussian 86(TM) system (copyright 1986, Carnegie Mellon
University), and the Gaussian 82(TM) system (copyright 1983,
Carnegie Mellon University). Gaussian is a federally registered
trademark of Gaussian, Inc.
This software contains proprietary and confidential information,
including trade secrets, belonging to Gaussian, Inc.
This software is provided under written license and may be
used, copied, transmitted, or stored only in accord with that
written license.
The following legend is applicable only to US Government
contracts under FAR:
RESTRICTED RIGHTS LEGEND
Use, reproduction and disclosure by the US Government is
subject to restrictions as set forth in subparagraphs (a)
and (c) of the Commercial Computer Software - Restricted
Rights clause in FAR 52.227-19.
Gaussian, Inc.
340 Quinnipiac St., Bldg. 40, Wallingford CT 06492
---------------------------------------------------------------
Warning -- This program may not be used in any manner that
competes with the business of Gaussian, Inc. or will provide
assistance to any competitor of Gaussian, Inc. The licensee
of this program is prohibited from giving any competitor of
Gaussian, Inc. access to this program. By using this program,
the user acknowledges that Gaussian, Inc. is engaged in the
business of creating and licensing software in the field of
computational chemistry and represents and warrants to the
licensee that it is not a competitor of Gaussian, Inc. and that
it will not use this program in any manner prohibited above.
---------------------------------------------------------------
Cite this work as:
Gaussian 16, Revision C.01,
M. J. Frisch, G. W. Trucks, H. B. Schlegel, G. E. Scuseria,
M. A. Robb, J. R. Cheeseman, G. Scalmani, V. Barone,
G. A. Petersson, H. Nakatsuji, X. Li, M. Caricato, A. V. Marenich,
J. Bloino, B. G. Janesko, R. Gomperts, B. Mennucci, H. P. Hratchian,
J. V. Ortiz, A. F. Izmaylov, J. L. Sonnenberg, D. Williams-Young,
F. Ding, F. Lipparini, F. Egidi, J. Goings, B. Peng, A. Petrone,
T. Henderson, D. Ranasinghe, V. G. Zakrzewski, J. Gao, N. Rega,
G. Zheng, W. Liang, M. Hada, M. Ehara, K. Toyota, R. Fukuda,
J. Hasegawa, M. Ishida, T. Nakajima, Y. Honda, O. Kitao, H. Nakai,
T. Vreven, K. Throssell, J. A. Montgomery, Jr., J. E. Peralta,
F. Ogliaro, M. J. Bearpark, J. J. Heyd, E. N. Brothers, K. N. Kudin,
V. N. Staroverov, T. A. Keith, R. Kobayashi, J. Normand,
K. Raghavachari, A. P. Rendell, J. C. Burant, S. S. Iyengar,
J. Tomasi, M. Cossi, J. M. Millam, M. Klene, C. Adamo, R. Cammi,
J. W. Ochterski, R. L. Martin, K. Morokuma, O. Farkas,
J. B. Foresman, and D. J. Fox, Gaussian, Inc., Wallingford CT, 2019.
******************************************
Gaussian 16: ES64L-G16RevC.01 3-Jul-2019
18-Dec-2019
******************************************
%oldchk=CONF_1_min.chk
%chk=CONF_1_ecd.chk
Copying data from "CONF_1_min.chk" to current chk file "CONF_1_ecd.chk"
IOpt= 2 FromEx=T IUOpen= 4 IOptOp= 5 NList= 0 IFRang= 0 IUIn= 4 IUOut= 2.
----------------------------------------------------------------------
#P td=(nstates=100) APFD/6-311+g(2d,p) guess=read geom=allcheck integr
al(ultrafinegrid) scrf=check
----------------------------------------------------------------------
1/29=7,38=1,40=1,172=1/1;
2/12=2,40=1/2;
3/5=4,6=6,7=112,11=9,14=-4,25=1,30=1,70=2,74=-44,75=-5,116=-2/1,2,3,8;
4/5=1/1;
5/5=2,38=6/2;
8/6=1,10=2,108=100/1;
9/41=100,42=1,70=2/14;
6/7=2,8=2,9=2,10=2/1;
99/5=1,9=1/99;
Leave Link 1 at Wed Dec 18 10:49:19 2019, MaxMem= 3221225472 cpu: 1.1 elap: 0.1
(Enter /public/apps/g16/l101.exe)
Structure from the checkpoint file: "CONF_1_ecd.chk"
-----
*****
-----
Charge = 0 Multiplicity = 1
Redundant internal coordinates found in file. (old form).
C,0,1.5734810719,2.0378210436,-0.7104192001
C,0,2.358714606,0.8190082036,-0.2432799925
C,0,1.5807652724,-0.4807448377,-0.4619998119
C,0,0.2058087746,-0.3692003831,0.23033298
C,0,-0.563881059,0.8711036377,-0.2369783758
C,0,0.2138471618,2.1731168853,-0.0234392546
C,0,-0.6408656072,-1.5900597376,0.0480033691
C,0,-1.9775599354,-1.6097023432,-0.0773662375
C,0,-2.731904514,-0.3521498359,0.0440554482
C,0,-1.9506157324,0.8829239716,0.393357682
C,0,-2.7596135935,-2.8669370448,-0.2940861146
O,0,-0.559754188,3.1858102907,-0.6948436397
C,0,0.3701905737,2.5572354662,1.4459816457
O,0,-3.9506146079,-0.327291548,-0.0847946943
C,0,3.7060222871,-1.825893725,-0.8235662928
C,0,2.3853814545,-1.7343973385,-0.0596341388
C,0,2.6339477423,-1.8554451905,1.4429886142
H,0,2.1505885696,2.9552566771,-0.5453800346
H,0,1.3918748982,1.9608086955,-1.7891766781
H,0,2.615549721,0.9232225939,0.8163397393
H,0,3.3059115186,0.7816386039,-0.7870013647
H,0,1.3856216293,-0.5669349052,-1.5418353111
H,0,0.3869437177,-0.2699945982,1.3123408354
H,0,-0.6921956569,0.7765711336,-1.3250274152
H,0,-0.1223686196,-2.5450435538,0.022166271
H,0,-2.5281040592,1.7619305886,0.1037758562
H,0,-1.8630714196,0.8912881373,1.4886244407
H,0,-2.09927793,-3.7346135754,-0.337241664
H,0,-3.3281468889,-2.8171213114,-1.2274104209
H,0,-3.4872865154,-3.0200203673,0.5084883086
H,0,-0.0868452048,4.020635354,-0.5992920457
H,0,0.8862528904,1.7856578441,2.0197742777
H,0,-0.6031897815,2.7347176338,1.9074582764
H,0,0.9564380202,3.4778767934,1.5227552934
H,0,3.5598695014,-1.6687140727,-1.8968923959
H,0,4.4299513738,-1.0859444161,-0.4707998082
H,0,4.1573860705,-2.8127596972,-0.6859372512
H,0,1.7955955399,-2.606424526,-0.3656392719
H,0,1.7041112072,-1.9146954749,2.0145687995
H,0,3.208993945,-2.7609303004,1.6578607486
H,0,3.2086477665,-1.0059047711,1.8234688282
Recover connectivity data from disk.
ITRead= 0 0 0 0 0 0 0 0 0 0 0 0 0 0 0 0 0 0 0 0
ITRead= 0 0 0 0 0 0 0 0 0 0 0 0 0 0 0 0 0 0 0 0
ITRead= 0
MicOpt= -1 -1 -1 -1 -1 -1 -1 -1 -1 -1 -1 -1 -1 -1 -1 -1 -1 -1 -1 -1
MicOpt= -1 -1 -1 -1 -1 -1 -1 -1 -1 -1 -1 -1 -1 -1 -1 -1 -1 -1 -1 -1
MicOpt= -1
----------------------------
! Current Parameters !
! (Angstroms and Degrees) !
-------------------------- --------------------------
! Name Definition Value !
--------------------------------------------------------------------------------
! R1 R(1,2) 1.5233 !
! R2 R(1,6) 1.5293 !
! R3 R(1,18) 1.0963 !
! R4 R(1,19) 1.0966 !
! R5 R(2,3) 1.5305 !
! R6 R(2,20) 1.0953 !
! R7 R(2,21) 1.0928 !
! R8 R(3,4) 1.5435 !
! R9 R(3,16) 1.543 !
! R10 R(3,22) 1.1007 !
! R11 R(4,5) 1.5327 !
! R12 R(4,7) 1.4969 !
! R13 R(4,23) 1.1015 !
! R14 R(5,6) 1.5316 !
! R15 R(5,10) 1.5233 !
! R16 R(5,24) 1.0997 !
! R17 R(6,12) 1.4404 !
! R18 R(6,13) 1.5268 !
! R19 R(7,8) 1.3427 !
! R20 R(7,25) 1.087 !
! R21 R(8,9) 1.4715 !
! R22 R(8,11) 1.4964 !
! R23 R(9,10) 1.5026 !
! R24 R(9,14) 1.2258 !
! R25 R(10,26) 1.0909 !
! R26 R(10,27) 1.0988 !
! R27 R(11,28) 1.0912 !
! R28 R(11,29) 1.094 !
! R29 R(11,30) 1.0941 !
! R30 R(12,31) 0.9642 !
! R31 R(13,32) 1.0913 !
! R32 R(13,33) 1.0918 !
! R33 R(13,34) 1.0941 !
! R34 R(15,16) 1.5284 !
! R35 R(15,35) 1.0946 !
! R36 R(15,36) 1.0936 !
! R37 R(15,37) 1.0939 !
! R38 R(16,17) 1.5278 !
! R39 R(16,38) 1.0963 !
! R40 R(17,39) 1.0931 !
! R41 R(17,40) 1.094 !
! R42 R(17,41) 1.094 !
! A1 A(2,1,6) 113.0369 !
! A2 A(2,1,18) 110.6124 !
! A3 A(2,1,19) 109.3201 !
! A4 A(6,1,18) 109.0462 !
! A5 A(6,1,19) 107.5094 !
! A6 A(18,1,19) 107.0986 !
! A7 A(1,2,3) 111.9411 !
! A8 A(1,2,20) 109.9645 !
! A9 A(1,2,21) 108.7591 !
! A10 A(3,2,20) 109.7706 !
! A11 A(3,2,21) 109.9031 !
! A12 A(20,2,21) 106.3412 !
! A13 A(2,3,4) 109.1069 !
! A14 A(2,3,16) 112.8086 !
! A15 A(2,3,22) 107.2663 !
! A16 A(4,3,16) 113.9708 !
! A17 A(4,3,22) 106.725 !
! A18 A(16,3,22) 106.5378 !
! A19 A(3,4,5) 111.6586 !
! A20 A(3,4,7) 112.9731 !
! A21 A(3,4,23) 107.4953 !
! A22 A(5,4,7) 109.8056 !
! A23 A(5,4,23) 108.0102 !
! A24 A(7,4,23) 106.6254 !
! A25 A(4,5,6) 112.9809 !
! A26 A(4,5,10) 109.7107 !
! A27 A(4,5,24) 106.9003 !
! A28 A(6,5,10) 113.4519 !
! A29 A(6,5,24) 105.6813 !
! A30 A(10,5,24) 107.69 !
! A31 A(1,6,5) 108.2772 !
! A32 A(1,6,12) 109.2864 !
! A33 A(1,6,13) 111.3175 !
! A34 A(5,6,12) 105.0683 !
! A35 A(5,6,13) 113.5816 !
! A36 A(12,6,13) 109.0695 !
! A37 A(4,7,8) 125.9024 !
! A38 A(4,7,25) 116.7218 !
! A39 A(8,7,25) 117.3745 !
! A40 A(7,8,9) 119.3502 !
! A41 A(7,8,11) 123.0997 !
! A42 A(9,8,11) 117.5202 !
! A43 A(8,9,10) 117.0707 !
! A44 A(8,9,14) 121.2222 !
! A45 A(10,9,14) 121.6503 !
! A46 A(5,10,9) 111.7628 !
! A47 A(5,10,26) 112.23 !
! A48 A(5,10,27) 109.8765 !
! A49 A(9,10,26) 108.9869 !
! A50 A(9,10,27) 106.2245 !
! A51 A(26,10,27) 107.4967 !
! A52 A(8,11,28) 110.9484 !
! A53 A(8,11,29) 110.9101 !
! A54 A(8,11,30) 111.033 !
! A55 A(28,11,29) 108.4785 !
! A56 A(28,11,30) 108.6763 !
! A57 A(29,11,30) 106.6515 !
! A58 A(6,12,31) 107.4042 !
! A59 A(6,13,32) 112.1218 !
! A60 A(6,13,33) 110.8795 !
! A61 A(6,13,34) 109.5166 !
! A62 A(32,13,33) 108.3193 !
! A63 A(32,13,34) 107.7369 !
! A64 A(33,13,34) 108.1353 !
! A65 A(16,15,35) 111.4782 !
! A66 A(16,15,36) 111.73 !
! A67 A(16,15,37) 110.3439 !
! A68 A(35,15,36) 107.9104 !
! A69 A(35,15,37) 107.94 !
! A70 A(36,15,37) 107.2585 !
! A71 A(3,16,15) 111.6457 !
! A72 A(3,16,17) 113.9327 !
! A73 A(3,16,38) 107.0336 !
! A74 A(15,16,17) 110.2582 !
! A75 A(15,16,38) 106.1236 !
! A76 A(17,16,38) 107.3985 !
! A77 A(16,17,39) 112.3447 !
! A78 A(16,17,40) 110.1373 !
! A79 A(16,17,41) 111.469 !
! A80 A(39,17,40) 107.4324 !
! A81 A(39,17,41) 107.8851 !
! A82 A(40,17,41) 107.3565 !
! D1 D(6,1,2,3) 57.4875 !
! D2 D(6,1,2,20) -64.8103 !
! D3 D(6,1,2,21) 179.1167 !
! D4 D(18,1,2,3) -179.9102 !
! D5 D(18,1,2,20) 57.792 !
! D6 D(18,1,2,21) -58.2811 !
! D7 D(19,1,2,3) -62.217 !
! D8 D(19,1,2,20) 175.4851 !
! D9 D(19,1,2,21) 59.4121 !
! D10 D(2,1,6,5) -55.2236 !
! D11 D(2,1,6,12) -169.1545 !
! D12 D(2,1,6,13) 70.307 !
! D13 D(18,1,6,5) -178.6944 !
! D14 D(18,1,6,12) 67.3747 !
! D15 D(18,1,6,13) -53.1638 !
! D16 D(19,1,6,5) 65.5159 !
! D17 D(19,1,6,12) -48.4149 !
! D18 D(19,1,6,13) -168.9534 !
! D19 D(1,2,3,4) -55.0742 !
! D20 D(1,2,3,16) 177.1835 !
! D21 D(1,2,3,22) 60.1779 !
! D22 D(20,2,3,4) 67.3342 !
! D23 D(20,2,3,16) -60.408 !
! D24 D(20,2,3,22) -177.4137 !
! D25 D(21,2,3,4) -176.0432 !
! D26 D(21,2,3,16) 56.2145 !
! D27 D(21,2,3,22) -60.7911 !
! D28 D(2,3,4,5) 54.5611 !
! D29 D(2,3,4,7) 178.916 !
! D30 D(2,3,4,23) -63.7319 !
! D31 D(16,3,4,5) -178.3537 !
! D32 D(16,3,4,7) -53.9988 !
! D33 D(16,3,4,23) 63.3533 !
! D34 D(22,3,4,5) -61.039 !
! D35 D(22,3,4,7) 63.3159 !
! D36 D(22,3,4,23) -179.332 !
! D37 D(2,3,16,15) -57.5342 !
! D38 D(2,3,16,17) 68.1764 !
! D39 D(2,3,16,38) -173.2605 !
! D40 D(4,3,16,15) 177.3245 !
! D41 D(4,3,16,17) -56.9648 !
! D42 D(4,3,16,38) 61.5983 !
! D43 D(22,3,16,15) 59.9018 !
! D44 D(22,3,16,17) -174.3876 !
! D45 D(22,3,16,38) -55.8245 !
! D46 D(3,4,5,6) -56.4822 !
! D47 D(3,4,5,10) 175.8468 !
! D48 D(3,4,5,24) 59.3468 !
! D49 D(7,4,5,6) 177.406 !
! D50 D(7,4,5,10) 49.735 !
! D51 D(7,4,5,24) -66.765 !
! D52 D(23,4,5,6) 61.5025 !
! D53 D(23,4,5,10) -66.1684 !
! D54 D(23,4,5,24) 177.3316 !
! D55 D(3,4,7,8) -145.5563 !
! D56 D(3,4,7,25) 34.8838 !
! D57 D(5,4,7,8) -20.1944 !
! D58 D(5,4,7,25) 160.2457 !
! D59 D(23,4,7,8) 96.5812 !
! D60 D(23,4,7,25) -82.9787 !
! D61 D(4,5,6,1) 54.8304 !
! D62 D(4,5,6,12) 171.5192 !
! D63 D(4,5,6,13) -69.3571 !
! D64 D(10,5,6,1) -179.4862 !
! D65 D(10,5,6,12) -62.7974 !
! D66 D(10,5,6,13) 56.3263 !
! D67 D(24,5,6,1) -61.7229 !
! D68 D(24,5,6,12) 54.9659 !
! D69 D(24,5,6,13) 174.0896 !
! D70 D(4,5,10,9) -58.3936 !
! D71 D(4,5,10,26) 178.813 !
! D72 D(4,5,10,27) 59.2669 !
! D73 D(6,5,10,9) 174.1984 !
! D74 D(6,5,10,26) 51.405 !
! D75 D(6,5,10,27) -68.1412 !
! D76 D(24,5,10,9) 57.6079 !
! D77 D(24,5,10,26) -65.1855 !
! D78 D(24,5,10,27) 175.2683 !
! D79 D(1,6,12,31) -62.6548 !
! D80 D(5,6,12,31) -178.6505 !
! D81 D(13,6,12,31) 59.2479 !
! D82 D(1,6,13,32) -63.6029 !
! D83 D(1,6,13,33) 175.1858 !
! D84 D(1,6,13,34) 55.934 !
! D85 D(5,6,13,32) 58.9218 !
! D86 D(5,6,13,33) -62.2895 !
! D87 D(5,6,13,34) 178.4587 !
! D88 D(12,6,13,32) 175.7311 !
! D89 D(12,6,13,33) 54.5197 !
! D90 D(12,6,13,34) -64.7321 !
! D91 D(4,7,8,9) -3.7312 !
! D92 D(4,7,8,11) 178.3095 !
! D93 D(25,7,8,9) 175.8261 !
! D94 D(25,7,8,11) -2.1332 !
! D95 D(7,8,9,10) -3.8263 !
! D96 D(7,8,9,14) 178.8683 !
! D97 D(11,8,9,10) 174.246 !
! D98 D(11,8,9,14) -3.0594 !
! D99 D(7,8,11,28) -0.2288 !
! D100 D(7,8,11,29) -120.8642 !
! D101 D(7,8,11,30) 120.7399 !
! D102 D(9,8,11,28) -178.223 !
! D103 D(9,8,11,29) 61.1415 !
! D104 D(9,8,11,30) -57.2544 !
! D105 D(8,9,10,5) 35.1485 !
! D106 D(8,9,10,26) 159.7703 !
! D107 D(8,9,10,27) -84.6823 !
! D108 D(14,9,10,5) -147.5585 !
! D109 D(14,9,10,26) -22.9367 !
! D110 D(14,9,10,27) 92.6108 !
! D111 D(35,15,16,3) -48.1514 !
! D112 D(35,15,16,17) -175.863 !
! D113 D(35,15,16,38) 68.1302 !
! D114 D(36,15,16,3) 72.6843 !
! D115 D(36,15,16,17) -55.0273 !
! D116 D(36,15,16,38) -171.034 !
! D117 D(37,15,16,3) -168.08 !
! D118 D(37,15,16,17) 64.2084 !
! D119 D(37,15,16,38) -51.7984 !
! D120 D(3,16,17,39) 60.413 !
! D121 D(3,16,17,40) -179.8702 !
! D122 D(3,16,17,41) -60.8156 !
! D123 D(15,16,17,39) -173.147 !
! D124 D(15,16,17,40) -53.4303 !
! D125 D(15,16,17,41) 65.6243 !
! D126 D(38,16,17,39) -57.9415 !
! D127 D(38,16,17,40) 61.7753 !
! D128 D(38,16,17,41) -179.1701 !
--------------------------------------------------------------------------------
NAtoms= 41 NQM= 41 NQMF= 0 NMMI= 0 NMMIF= 0
NMic= 0 NMicF= 0.
Isotopes and Nuclear Properties:
(Nuclear quadrupole moments (NQMom) in fm**2, nuclear magnetic moments (NMagM)
in nuclear magnetons)
Atom 1 2 3 4 5 6 7 8 9 10
IAtWgt= 12 12 12 12 12 12 12 12 12 12
AtmWgt= 12.0000000 12.0000000 12.0000000 12.0000000 12.0000000 12.0000000 12.0000000 12.0000000 12.0000000 12.0000000
NucSpn= 0 0 0 0 0 0 0 0 0 0
AtZEff= 3.6000000 3.6000000 3.6000000 3.6000000 3.6000000 3.6000000 3.6000000 3.6000000 3.6000000 3.6000000
NQMom= 0.0000000 0.0000000 0.0000000 0.0000000 0.0000000 0.0000000 0.0000000 0.0000000 0.0000000 0.0000000
NMagM= 0.0000000 0.0000000 0.0000000 0.0000000 0.0000000 0.0000000 0.0000000 0.0000000 0.0000000 0.0000000
AtZNuc= 6.0000000 6.0000000 6.0000000 6.0000000 6.0000000 6.0000000 6.0000000 6.0000000 6.0000000 6.0000000
Atom 11 12 13 14 15 16 17 18 19 20
IAtWgt= 12 16 12 16 12 12 12 1 1 1
AtmWgt= 12.0000000 15.9949146 12.0000000 15.9949146 12.0000000 12.0000000 12.0000000 1.0078250 1.0078250 1.0078250
NucSpn= 0 0 0 0 0 0 0 1 1 1
AtZEff= 3.6000000 5.6000000 3.6000000 5.6000000 3.6000000 3.6000000 3.6000000 1.0000000 1.0000000 1.0000000
NQMom= 0.0000000 0.0000000 0.0000000 0.0000000 0.0000000 0.0000000 0.0000000 0.0000000 0.0000000 0.0000000
NMagM= 0.0000000 0.0000000 0.0000000 0.0000000 0.0000000 0.0000000 0.0000000 2.7928460 2.7928460 2.7928460
AtZNuc= 6.0000000 8.0000000 6.0000000 8.0000000 6.0000000 6.0000000 6.0000000 1.0000000 1.0000000 1.0000000
Atom 21 22 23 24 25 26 27 28 29 30
IAtWgt= 1 1 1 1 1 1 1 1 1 1
AtmWgt= 1.0078250 1.0078250 1.0078250 1.0078250 1.0078250 1.0078250 1.0078250 1.0078250 1.0078250 1.0078250
NucSpn= 1 1 1 1 1 1 1 1 1 1
AtZEff= 1.0000000 1.0000000 1.0000000 1.0000000 1.0000000 1.0000000 1.0000000 1.0000000 1.0000000 1.0000000
NQMom= 0.0000000 0.0000000 0.0000000 0.0000000 0.0000000 0.0000000 0.0000000 0.0000000 0.0000000 0.0000000
NMagM= 2.7928460 2.7928460 2.7928460 2.7928460 2.7928460 2.7928460 2.7928460 2.7928460 2.7928460 2.7928460
AtZNuc= 1.0000000 1.0000000 1.0000000 1.0000000 1.0000000 1.0000000 1.0000000 1.0000000 1.0000000 1.0000000
Atom 31 32 33 34 35 36 37 38 39 40
IAtWgt= 1 1 1 1 1 1 1 1 1 1
AtmWgt= 1.0078250 1.0078250 1.0078250 1.0078250 1.0078250 1.0078250 1.0078250 1.0078250 1.0078250 1.0078250
NucSpn= 1 1 1 1 1 1 1 1 1 1
AtZEff= 1.0000000 1.0000000 1.0000000 1.0000000 1.0000000 1.0000000 1.0000000 1.0000000 1.0000000 1.0000000
NQMom= 0.0000000 0.0000000 0.0000000 0.0000000 0.0000000 0.0000000 0.0000000 0.0000000 0.0000000 0.0000000
NMagM= 2.7928460 2.7928460 2.7928460 2.7928460 2.7928460 2.7928460 2.7928460 2.7928460 2.7928460 2.7928460
AtZNuc= 1.0000000 1.0000000 1.0000000 1.0000000 1.0000000 1.0000000 1.0000000 1.0000000 1.0000000 1.0000000
Atom 41
IAtWgt= 1
AtmWgt= 1.0078250
NucSpn= 1
AtZEff= 1.0000000
NQMom= 0.0000000
NMagM= 2.7928460
AtZNuc= 1.0000000
Leave Link 101 at Wed Dec 18 10:49:19 2019, MaxMem= 3221225472 cpu: 4.4 elap: 0.4
(Enter /public/apps/g16/l202.exe)
Input orientation:
---------------------------------------------------------------------
Center Atomic Atomic Coordinates (Angstroms)
Number Number Type X Y Z
---------------------------------------------------------------------
1 6 0 1.573481 2.037821 -0.710419
2 6 0 2.358715 0.819008 -0.243280
3 6 0 1.580765 -0.480745 -0.462000
4 6 0 0.205809 -0.369200 0.230333
5 6 0 -0.563881 0.871104 -0.236978
6 6 0 0.213847 2.173117 -0.023439
7 6 0 -0.640866 -1.590060 0.048003
8 6 0 -1.977560 -1.609702 -0.077366
9 6 0 -2.731905 -0.352150 0.044055
10 6 0 -1.950616 0.882924 0.393358
11 6 0 -2.759614 -2.866937 -0.294086
12 8 0 -0.559754 3.185810 -0.694844
13 6 0 0.370191 2.557235 1.445982
14 8 0 -3.950615 -0.327292 -0.084795
15 6 0 3.706022 -1.825894 -0.823566
16 6 0 2.385381 -1.734397 -0.059634
17 6 0 2.633948 -1.855445 1.442989
18 1 0 2.150589 2.955257 -0.545380
19 1 0 1.391875 1.960809 -1.789177
20 1 0 2.615550 0.923223 0.816340
21 1 0 3.305912 0.781639 -0.787001
22 1 0 1.385622 -0.566935 -1.541835
23 1 0 0.386944 -0.269995 1.312341
24 1 0 -0.692196 0.776571 -1.325027
25 1 0 -0.122369 -2.545044 0.022166
26 1 0 -2.528104 1.761931 0.103776
27 1 0 -1.863071 0.891288 1.488624
28 1 0 -2.099278 -3.734614 -0.337242
29 1 0 -3.328147 -2.817121 -1.227410
30 1 0 -3.487287 -3.020020 0.508488
31 1 0 -0.086845 4.020635 -0.599292
32 1 0 0.886253 1.785658 2.019774
33 1 0 -0.603190 2.734718 1.907458
34 1 0 0.956438 3.477877 1.522755
35 1 0 3.559870 -1.668714 -1.896892
36 1 0 4.429951 -1.085944 -0.470800
37 1 0 4.157386 -2.812760 -0.685937
38 1 0 1.795596 -2.606425 -0.365639
39 1 0 1.704111 -1.914695 2.014569
40 1 0 3.208994 -2.760930 1.657861
41 1 0 3.208648 -1.005905 1.823469
---------------------------------------------------------------------
Distance matrix (angstroms):
1 2 3 4 5
1 C 0.000000
2 C 1.523258 0.000000
3 C 2.530798 1.530491 0.000000
4 C 2.923918 2.504227 1.543461 0.000000
5 C 2.480664 2.923067 2.545120 1.532696 0.000000
6 C 1.529330 2.546055 3.017248 2.554964 1.531567
7 C 4.317413 3.858230 2.535020 1.496863 2.478803
8 C 5.129822 4.972870 3.752888 2.529945 2.859784
9 C 4.981720 5.231498 4.344163 2.943663 2.505126
10 C 3.869285 4.356572 3.880964 2.498912 1.523318
11 C 6.557873 6.307619 4.955905 3.912472 4.335603
12 O 2.422564 3.784590 4.252019 3.752351 2.359560
13 C 2.523443 3.135166 3.786187 3.173145 2.558884
14 O 6.041589 6.414574 5.546350 4.168563 3.595730
15 C 4.414615 3.024480 2.541038 3.934991 5.084285
16 C 3.913098 2.560140 1.543033 2.588123 3.939319
17 C 4.573760 3.173635 2.574485 3.094401 4.525756
18 H 1.096348 2.167519 3.483928 3.928857 3.436153
19 H 1.096645 2.151345 2.785366 3.303652 2.724290
20 H 2.158525 1.095271 2.162419 2.796536 3.349772
21 H 2.141302 1.092800 2.162260 3.459774 3.909709
22 H 2.740675 2.134009 1.100706 2.138139 2.751575
23 H 3.290204 2.737474 2.148932 1.101541 2.146291
24 H 2.664918 3.237288 2.737154 2.130340 1.099660
25 H 4.941178 4.188446 2.719634 2.210278 3.454295
26 H 4.190708 4.989043 4.715135 3.468720 2.183543
27 H 4.237950 4.563792 4.188964 2.729907 2.160094
28 H 6.851965 6.373225 4.913852 4.118443 4.855937
29 H 6.918360 6.821315 5.490166 4.539403 4.714353
30 H 7.258021 7.034133 5.751080 4.554467 4.923705
31 H 2.588549 4.044493 4.802312 4.477118 3.205992
32 H 2.826628 2.867746 3.431928 2.882450 2.834119
33 H 3.475175 4.131404 4.552273 3.619604 2.841340
34 H 2.727924 3.486380 4.472105 4.127203 3.493322
35 H 4.369423 3.219623 2.717911 4.178941 5.119698
36 H 4.239664 2.823231 2.912766 4.341508 5.368712
37 H 5.495935 4.076874 3.482444 4.735557 6.005229
38 H 4.662320 3.473567 2.138680 2.808519 4.204389
39 H 4.802605 3.605485 2.864406 2.795883 4.239567
40 H 5.595683 4.141651 3.513429 4.096014 5.569261
41 H 4.284697 2.885159 2.854674 3.458398 4.690477
6 7 8 9 10
6 C 0.000000
7 C 3.859681 0.000000
8 C 4.372058 1.342704 0.000000
9 C 3.880590 2.429996 1.471468 0.000000
10 C 2.554059 2.819639 2.536827 1.502608 0.000000
11 C 5.858060 2.497305 1.496401 2.537570 3.897244
12 O 1.440413 4.833977 5.038690 4.216796 2.902062
13 C 1.526823 4.491841 5.019551 4.478048 3.049177
14 O 4.857834 3.544948 2.353206 1.225755 2.386053
15 C 5.369132 4.439672 5.736433 6.661200 6.388752
16 C 4.470519 3.031599 4.364759 5.301696 5.084923
17 C 4.923069 3.569428 4.861879 5.745370 5.442299
18 H 2.152936 5.366956 6.172479 5.926644 4.689954
19 H 2.133226 4.485079 5.199224 5.071102 4.134917
20 H 2.834720 4.184635 5.320815 5.551420 4.585892
21 H 3.475644 4.679662 5.842702 6.199303 5.388375
22 H 3.344617 2.771466 3.813532 4.417602 4.120381
23 H 2.789814 2.097025 3.052373 3.367865 2.763682
24 H 2.113146 2.736565 2.983810 2.703481 2.132552
25 H 4.730344 1.086969 2.080025 3.408657 3.902721
26 H 2.775528 3.847157 3.421085 2.124720 1.090873
27 H 2.871065 3.118696 2.953030 2.094705 1.098792
28 H 6.352189 2.621925 2.144201 3.462176 4.677342
29 H 6.236806 3.217739 2.145821 2.836938 4.267882
30 H 6.399220 3.218532 2.147440 2.811376 4.196139
31 H 1.958404 5.675018 5.962207 5.150872 3.782093
32 H 2.185629 4.197075 4.912015 4.643786 3.392342
33 H 2.170555 4.707727 4.970152 4.187177 2.745396
34 H 2.155123 5.514549 6.087051 5.519015 4.057127
35 H 5.428200 4.629793 5.829004 6.714688 6.490112
36 H 5.347630 5.122155 6.440909 7.217736 6.733116
37 H 6.391351 5.005685 6.281343 7.351858 7.220155
38 H 5.046092 2.672160 3.913216 5.074235 5.175493
39 H 4.804641 3.077610 4.245458 5.099285 4.879757
40 H 6.011863 4.334051 5.588978 6.610663 6.441911
41 H 4.741949 4.279284 5.556482 6.235693 5.677226
11 12 13 14 15
11 C 0.000000
12 O 6.452576 0.000000
13 C 6.499627 2.417237 0.000000
14 O 2.812843 4.920567 5.416007 0.000000
15 C 6.570279 6.582598 5.957386 7.836816 0.000000
16 C 5.273385 5.769381 4.974534 6.490410 1.528416
17 C 5.755958 6.339110 4.959471 6.930068 2.507486
18 H 7.620444 2.724234 2.700696 6.943482 5.035490
19 H 6.540434 2.550892 3.444679 6.056609 4.541673
20 H 6.670138 4.181571 2.847470 6.744653 3.381725
21 H 7.095468 4.553230 4.093582 7.374279 2.638304
22 H 4.902026 4.311030 4.440562 5.536769 2.735900
23 H 4.384694 4.107020 2.830436 4.557377 4.242547
24 H 4.314187 2.493813 3.460913 3.657046 5.135037
25 H 2.675573 5.792072 5.320067 4.425532 3.986103
26 H 4.651699 2.557270 3.291525 2.534550 7.252364
27 H 4.255126 3.425055 2.786514 2.884167 6.613933
28 H 1.091223 7.098611 6.990388 3.886003 6.130353
29 H 1.093986 6.631954 7.050421 2.809322 7.115136
30 H 1.094106 6.966404 6.845787 2.795970 7.412422
31 H 7.394288 0.964213 2.556084 5.839340 6.972664
32 H 6.347671 3.379425 1.091279 5.682346 5.392494
33 H 6.393395 2.641467 1.091755 4.954818 6.843024
34 H 7.574075 2.702200 1.094148 6.414257 6.418366
35 H 6.628770 6.479400 6.261590 7.841587 1.094575
36 H 7.408982 6.572309 5.781736 8.423683 1.093637
37 H 6.928302 7.631142 6.908312 8.501682 1.093881
38 H 4.563213 6.261472 5.654833 6.188073 2.113920
39 H 5.114830 6.203319 4.701149 6.237235 3.474269
40 H 6.280574 7.423099 6.032129 7.760119 2.697927
41 H 6.600578 6.173591 4.571138 7.440230 2.815414
16 17 18 19 20
16 C 0.000000
17 C 1.527846 0.000000
18 H 4.720586 5.227820 0.000000
19 H 4.199157 5.153002 1.763974 0.000000
20 H 2.807713 2.848512 2.489906 3.059850 0.000000
21 H 2.776126 3.518324 2.473412 2.461368 1.751385
22 H 2.135277 3.482492 3.739509 2.539824 3.048652
23 H 2.832057 2.753134 4.118715 3.950415 2.576135
24 H 4.168653 5.064845 3.665507 2.441558 3.943113
25 H 2.636788 3.176722 5.978440 5.086905 4.489519
26 H 6.032690 6.444042 4.871919 4.357643 5.260072
27 H 5.228832 5.269707 4.950415 4.741575 4.528911
28 H 4.918343 5.394805 7.928370 6.836234 6.727242
29 H 5.931307 6.603213 7.987619 6.739644 7.314001
30 H 6.038528 6.300717 8.282524 7.341263 7.272451
31 H 6.286775 6.789841 2.478719 2.800951 4.347519
32 H 4.354551 4.079798 3.089745 3.846354 2.276514
33 H 5.724858 5.635990 3.694367 4.271338 3.851277
34 H 5.631486 5.591487 2.444649 3.668786 3.126969
35 H 2.181572 3.470880 5.019339 4.229094 3.869303
36 H 2.183991 2.735022 4.640298 4.500081 2.997588
37 H 2.166823 2.787408 6.108765 5.626024 4.311805
38 H 1.096320 2.130244 5.575897 4.800945 3.811536
39 H 2.190652 1.093074 5.519884 5.439256 3.212515
40 H 2.163769 1.093961 6.216855 6.121994 3.825352
41 H 2.180492 1.093967 4.735159 5.015303 2.255572
21 22 23 24 25
21 H 0.000000
22 H 2.464942 0.000000
23 H 3.746137 3.038396 0.000000
24 H 4.034149 2.483815 3.035713 0.000000
25 H 4.845067 2.938205 2.664544 3.629429 0.000000
26 H 5.982491 4.842406 3.753246 2.526454 4.933989
27 H 5.648795 4.675907 2.538153 3.049713 4.121762
28 H 7.057966 4.861045 4.572309 4.827669 2.335042
29 H 7.560143 5.232764 5.171082 4.457846 3.451446
30 H 7.891669 5.828095 4.818556 5.058500 3.432897
31 H 4.694372 4.909414 4.721051 3.378919 6.595120
32 H 3.839374 4.297572 2.230578 3.833726 4.874703
33 H 5.133781 5.172418 3.219134 3.780373 5.626846
34 H 4.257312 5.092781 3.796727 4.257336 6.300092
35 H 2.701959 2.463196 4.724728 4.938270 4.243774
36 H 2.202570 3.268705 4.493470 5.516798 4.805789
37 H 3.695257 3.668647 4.967394 6.067139 4.346192
38 H 3.733306 2.389777 3.202940 4.307458 1.957740
39 H 4.205327 3.816530 2.221057 4.913055 2.775434
40 H 4.305408 4.286765 3.779962 6.052340 3.717537
41 H 3.165332 3.852453 2.960545 5.320416 4.087702
26 27 28 29 30
26 H 0.000000
27 H 1.765812 0.000000
28 H 5.530858 4.978810 0.000000
29 H 4.835271 4.824478 1.773221 0.000000
30 H 4.893963 4.347077 1.775520 1.754947 0.000000
31 H 3.399382 4.160191 8.016386 7.593121 7.896899
32 H 3.915284 2.939524 6.703903 7.034980 6.671310
33 H 2.811562 2.271774 7.009223 6.933665 6.587271
34 H 4.135216 3.826387 8.050901 8.096177 7.937134
35 H 7.268798 6.886481 6.223054 7.015113 7.567978
36 H 7.540230 6.881201 7.047278 7.984831 8.208673
37 H 8.139239 7.395580 6.333818 7.505093 7.740196
38 H 6.164191 5.390559 4.055078 5.199979 5.370661
39 H 5.922867 4.568912 4.827927 6.053794 5.517303
40 H 7.468985 6.252455 5.753802 7.145779 6.799144
41 H 6.597619 5.425292 6.347330 7.437611 7.114870
31 32 33 34 35
31 H 0.000000
32 H 3.577926 0.000000
33 H 2.864261 1.769680 0.000000
34 H 2.426131 1.765095 1.769949 0.000000
35 H 6.881206 5.866957 7.155023 6.705165 0.000000
36 H 6.818733 5.196812 6.751746 6.071904 1.769294
37 H 8.044644 6.258325 7.756500 7.395708 1.769825
38 H 6.893192 5.080107 6.280839 6.425647 2.517280
39 H 6.728146 3.789661 5.191546 5.466327 4.336343
40 H 7.870637 5.118356 6.693070 6.634378 3.735280
41 H 6.480444 3.636602 5.341293 5.026646 3.795229
36 37 38 39 40
36 H 0.000000
37 H 1.761382 0.000000
38 H 3.043476 2.392325 0.000000
39 H 3.780753 3.757367 2.480373 0.000000
40 H 2.971113 2.528937 2.473079 1.762959 0.000000
41 H 2.600319 3.234493 3.057871 1.768064 1.762822
41
41 H 0.000000
Stoichiometry C15H24O2
Framework group C1[X(C15H24O2)]
Deg. of freedom 117
Full point group C1 NOp 1
RotChk: IX=0 Diff= 4.06D-16
Largest Abelian subgroup C1 NOp 1
Largest concise Abelian subgroup C1 NOp 1
Standard orientation:
---------------------------------------------------------------------
Center Atomic Atomic Coordinates (Angstroms)
Number Number Type X Y Z
---------------------------------------------------------------------
1 6 0 1.446022 2.081799 -0.730285
2 6 0 2.257675 0.883794 -0.254555
3 6 0 1.509844 -0.434492 -0.467328
4 6 0 0.131242 -0.350188 0.221600
5 6 0 -0.665358 0.869654 -0.254395
6 6 0 0.082212 2.190164 -0.046816
7 6 0 -0.687162 -1.590952 0.044624
8 6 0 -2.022798 -1.641610 -0.083302
9 6 0 -2.805700 -0.400808 0.029356
10 6 0 -2.053343 0.853639 0.373089
11 6 0 -2.775700 -2.917471 -0.294328
12 8 0 -0.712706 3.181201 -0.725596
13 6 0 0.226683 2.586130 1.420674
14 8 0 -4.024384 -0.404323 -0.102071
15 6 0 3.665800 -1.733160 -0.816881
16 6 0 2.341801 -1.667258 -0.056130
17 6 0 2.589847 -1.774040 1.447659
18 1 0 2.001841 3.013012 -0.569388
19 1 0 1.268505 1.994519 -1.808941
20 1 0 2.509826 0.999865 0.804957
21 1 0 3.206631 0.864798 -0.796157
22 1 0 1.319002 -0.531261 -1.547036
23 1 0 0.307779 -0.240712 1.303378
24 1 0 -0.789181 0.766013 -1.342135
25 1 0 -0.147105 -2.534068 0.025332
26 1 0 -2.649983 1.717656 0.077288
27 1 0 -1.968343 0.870252 1.468462
28 1 0 -2.095783 -3.770187 -0.331158
29 1 0 -3.343228 -2.885898 -1.229059
30 1 0 -3.501424 -3.082418 0.507660
31 1 0 -0.259039 4.027066 -0.633916
32 1 0 0.758873 1.829746 1.999938
33 1 0 -0.751449 2.744136 1.879173
34 1 0 0.791754 3.520249 1.493308
35 1 0 3.518408 -1.585478 -1.891386
36 1 0 4.372024 -0.974983 -0.466942
37 1 0 4.139115 -2.708736 -0.672660
38 1 0 1.772579 -2.554169 -0.358278
39 1 0 1.660377 -1.851084 2.017712
40 1 0 3.184804 -2.665012 1.668900
41 1 0 3.144339 -0.909526 1.824381
---------------------------------------------------------------------
Rotational constants (GHZ): 0.5578467 0.4055651 0.2642428
Leave Link 202 at Wed Dec 18 10:49:19 2019, MaxMem= 3221225472 cpu: 0.1 elap: 0.0
(Enter /public/apps/g16/l301.exe)
Standard basis: 6-311+G(2d,p) (5D, 7F)
Ernie: Thresh= 0.10000D-02 Tol= 0.10000D-05 Strict=F.
There are 637 symmetry adapted cartesian basis functions of A symmetry.
There are 603 symmetry adapted basis functions of A symmetry.
603 basis functions, 906 primitive gaussians, 637 cartesian basis functions
65 alpha electrons 65 beta electrons
nuclear repulsion energy 1331.1378480691 Hartrees.
IExCor= 3731 DFT=T Ex+Corr=APFD ExCW=0 ScaHFX= 0.229450
ScaDFX= 1.000000 1.000000 1.000000 1.000000 ScalE2= 1.000000 1.000000
IRadAn= 5 IRanWt= -1 IRanGd= 0 ICorTp=0 IEmpDi=211
NAtoms= 41 NActive= 41 NUniq= 41 SFac= 1.00D+00 NAtFMM= 60 NAOKFM=F Big=F
Integral buffers will be 131072 words long.
Regular integral format.
Two-electron integral symmetry is turned on.
R6APFD: NTU= -4 IXU= 1 FactS= 1.050
R6Disp: Petersson-Frisch Dispersion energy= -0.0438257857 Hartrees.
Nuclear repulsion after empirical dispersion term = 1331.0940222833 Hartrees.
------------------------------------------------------------------------------
Polarizable Continuum Model (PCM)
=================================
Model : PCM.
Atomic radii : Bondi.
Polarization charges : Total charges.
Charge compensation : None.
Solution method : Matrix inversion.
Cavity type : Scaled VdW (van der Waals Surface) (Alpha=1.100).
Cavity algorithm : GePol (No added spheres)
Default sphere list used, NSphG= 41.
Lebedev-Laikov grids with approx. 5.0 points / Ang**2.
Smoothing algorithm: York/Karplus (Gamma=1.0000).
Polarization charges: spherical gaussians, with
point-specific exponents (IZeta= 3).
Self-potential: point-specific (ISelfS= 7).
Self-field : sphere-specific E.n sum rule (ISelfD= 2).
Solvent : Acetonitrile, Eps= 35.688000 Eps(inf)= 1.806874
------------------------------------------------------------------------------
GePol: Number of generator spheres = 41
GePol: Total number of spheres = 41
GePol: Number of exposed spheres = 41 (100.00%)
GePol: Number of points = 2415
GePol: Average weight of points = 0.12
GePol: Minimum weight of points = 0.31D-11
GePol: Maximum weight of points = 0.21770
GePol: Number of points with low weight = 214
GePol: Fraction of low-weight points (<1% of avg) = 8.86%
GePol: Cavity surface area = 298.417 Ang**2
GePol: Cavity volume = 284.140 Ang**3
Leave Link 301 at Wed Dec 18 10:49:19 2019, MaxMem= 3221225472 cpu: 1.0 elap: 0.1
(Enter /public/apps/g16/l302.exe)
NPDir=0 NMtPBC= 1 NCelOv= 1 NCel= 1 NClECP= 1 NCelD= 1
NCelK= 1 NCelE2= 1 NClLst= 1 CellRange= 0.0.
One-electron integrals computed using PRISM.
One-electron integral symmetry used in STVInt
NBasis= 603 RedAO= T EigKep= 1.10D-06 NBF= 603
NBsUse= 602 1.00D-06 EigRej= 5.63D-07 NBFU= 602
Precomputing XC quadrature grid using
IXCGrd= 4 IRadAn= 5 IRanWt= -1 IRanGd= 0 AccXCQ= 0.00D+00.
Generated NRdTot= 0 NPtTot= 0 NUsed= 0 NTot= 32
NSgBfM= 637 637 637 637 637 MxSgAt= 41 MxSgA2= 41.
Leave Link 302 at Wed Dec 18 10:49:20 2019, MaxMem= 3221225472 cpu: 8.7 elap: 0.8
(Enter /public/apps/g16/l303.exe)
DipDrv: MaxL=1.
Leave Link 303 at Wed Dec 18 10:49:20 2019, MaxMem= 3221225472 cpu: 0.8 elap: 0.1
(Enter /public/apps/g16/l308.exe)
Leave Link 308 at Wed Dec 18 10:49:20 2019, MaxMem= 3221225472 cpu: 1.4 elap: 0.2
(Enter /public/apps/g16/l401.exe)
Initial guess from the checkpoint file: "CONF_1_ecd.chk"
B after Tr= -0.000000 -0.000000 -0.000000
Rot= 1.000000 0.000000 -0.000000 0.000000 Ang= 0.00 deg.
Guess basis will be translated and rotated to current coordinates.
JPrj=2 DoOrth=T DoCkMO=T.
Leave Link 401 at Wed Dec 18 10:49:21 2019, MaxMem= 3221225472 cpu: 7.4 elap: 0.6
(Enter /public/apps/g16/l502.exe)
Integral symmetry usage will be decided dynamically.
Closed shell SCF:
Using DIIS extrapolation, IDIIS= 1040.
NGot= 3221225472 LenX= 3220399270 LenY= 3219992864
Requested convergence on RMS density matrix=1.00D-08 within 128 cycles.
Requested convergence on MAX density matrix=1.00D-06.
Requested convergence on energy=1.00D-06.
No special actions if energy rises.
Fock matrices will be formed incrementally for 20 cycles.
Cycle 1 Pass 1 IDiag 1:
FoFJK: IHMeth= 1 ICntrl= 0 DoSepK=F KAlg= 0 I1Cent= 0 FoldK=F
IRaf= 880000000 NMat= 1 IRICut= 1 DoRegI=T DoRafI=F ISym2E= 0 IDoP0=0 IntGTp=1.
FoFCou: FMM=F IPFlag= 0 FMFlag= 100000 FMFlg1= 0
NFxFlg= 0 DoJE=F BraDBF=F KetDBF=F FulRan=T
wScrn= 0.000000 ICntrl= 0 IOpCl= 0 I1Cent= 0 NGrid= 0
NMat0= 1 NMatS0= 1 NMatT0= 0 NMatD0= 1 NMtDS0= 0 NMtDT0= 0
Symmetry not used in FoFCou.
Inv3: Mode=1 IEnd= 17496675.
Iteration 1 A*A^-1 deviation from unit magnitude is 3.11D-15 for 364.
Iteration 1 A*A^-1 deviation from orthogonality is 2.19D-15 for 2342 1295.
Iteration 1 A^-1*A deviation from unit magnitude is 2.78D-15 for 583.
Iteration 1 A^-1*A deviation from orthogonality is 3.85D-13 for 1887 1879.
E= -736.158594419886
DIIS: error= 1.49D-09 at cycle 1 NSaved= 1.
NSaved= 1 IEnMin= 1 EnMin= -736.158594419886 IErMin= 1 ErrMin= 1.49D-09
ErrMax= 1.49D-09 0.00D+00 EMaxC= 1.00D-01 BMatC= 3.41D-15 BMatP= 3.41D-15
IDIUse=1 WtCom= 1.00D+00 WtEn= 0.00D+00
Coeff-Com: 0.100D+01
Coeff: 0.100D+01
Gap= 0.204 Goal= None Shift= 0.000
RMSDP=1.72D-09 MaxDP=4.31D-07 OVMax= 5.00D-08
Error on total polarization charges = 0.04828
SCF Done: E(RAPFD) = -736.158594420 A.U. after 1 cycles
NFock= 1 Conv=0.17D-08 -V/T= 2.0046
KE= 7.328091606427D+02 PE=-4.374797760921D+03 EE= 1.574735983575D+03
Leave Link 502 at Wed Dec 18 10:49:50 2019, MaxMem= 3221225472 cpu: 342.3 elap: 29.0
(Enter /public/apps/g16/l801.exe)
DoSCS=F DFT=T ScalE2(SS,OS)= 1.000000 1.000000
ExpMin= 4.38D-02 ExpMax= 8.59D+03 ExpMxC= 1.30D+03 IAcc=3 IRadAn= 5 AccDes= 0.00D+00
HarFok: IExCor= 205 AccDes= 0.00D+00 IRadAn= 5 IDoV=-2 UseB2=F ITyADJ=14
ICtDFT= 12500011 ScaDFX= 1.000000 1.000000 1.000000 1.000000
Largest valence mixing into a core orbital is 5.59D-05
Largest core mixing into a valence orbital is 1.50D-05
Range of M.O.s used for correlation: 18 602
NBasis= 603 NAE= 65 NBE= 65 NFC= 17 NFV= 0
NROrb= 585 NOA= 48 NOB= 48 NVA= 537 NVB= 537
**** Warning!!: The largest alpha MO coefficient is 0.18020192D+03
Leave Link 801 at Wed Dec 18 10:49:50 2019, MaxMem= 3221225472 cpu: 2.0 elap: 0.2
(Enter /public/apps/g16/l914.exe)
RHF ground state
Two-electron integrals replicated using symmetry.
MDV= 3221225472 DFT=T DoStab=F Mixed=T DoRPA=T DoScal=F NonHer=T
NEqPCM: Using non-equilibrium solvation (IEInf=1, Eps= 35.6880, EpsInf= 1.8069)
Inv3: Mode=1 IEnd= 17496675.
Iteration 1 A*A^-1 deviation from unit magnitude is 3.11D-15 for 1484.
Iteration 1 A*A^-1 deviation from orthogonality is 2.00D-15 for 2192 1816.
Iteration 1 A^-1*A deviation from unit magnitude is 3.11D-15 for 1484.
Iteration 1 A^-1*A deviation from orthogonality is 1.52D-15 for 1540 1137.
Making orbital integer symmetry assigments:
Orbital symmetries:
Occupied (A) (A) (A) (A) (A) (A) (A) (A) (A) (A) (A) (A)
(A) (A) (A) (A) (A) (A) (A) (A) (A) (A) (A) (A)
(A) (A) (A) (A) (A) (A) (A) (A) (A) (A) (A) (A)
(A) (A) (A) (A) (A) (A) (A) (A) (A) (A) (A) (A)
(A) (A) (A) (A) (A) (A) (A) (A) (A) (A) (A) (A)
(A) (A) (A) (A) (A)
Virtual (A) (A) (A) (A) (A) (A) (A) (A) (A) (A) (A) (A)
(A) (A) (A) (A) (A) (A) (A) (A) (A) (A) (A) (A)
(A) (A) (A) (A) (A) (A) (A) (A) (A) (A) (A) (A)
(A) (A) (A) (A) (A) (A) (A) (A) (A) (A) (A) (A)
(A) (A) (A) (A) (A) (A) (A) (A) (A) (A) (A) (A)
(A) (A) (A) (A) (A) (A) (A) (A) (A) (A) (A) (A)
(A) (A) (A) (A) (A) (A) (A) (A) (A) (A) (A) (A)
(A) (A) (A) (A) (A) (A) (A) (A) (A) (A) (A) (A)
(A) (A) (A) (A) (A) (A) (A) (A) (A) (A) (A) (A)
(A) (A) (A) (A) (A) (A) (A) (A) (A) (A) (A) (A)
(A) (A) (A) (A) (A) (A) (A) (A) (A) (A) (A) (A)
(A) (A) (A) (A) (A) (A) (A) (A) (A) (A) (A) (A)
(A) (A) (A) (A) (A) (A) (A) (A) (A) (A) (A) (A)
(A) (A) (A) (A) (A) (A) (A) (A) (A) (A) (A) (A)
(A) (A) (A) (A) (A) (A) (A) (A) (A) (A) (A) (A)
(A) (A) (A) (A) (A) (A) (A) (A) (A) (A) (A) (A)
(A) (A) (A) (A) (A) (A) (A) (A) (A) (A) (A) (A)
(A) (A) (A) (A) (A) (A) (A) (A) (A) (A) (A) (A)
(A) (A) (A) (A) (A) (A) (A) (A) (A) (A) (A) (A)
(A) (A) (A) (A) (A) (A) (A) (A) (A) (A) (A) (A)
(A) (A) (A) (A) (A) (A) (A) (A) (A) (A) (A) (A)
(A) (A) (A) (A) (A) (A) (A) (A) (A) (A) (A) (A)
(A) (A) (A) (A) (A) (A) (A) (A) (A) (A) (A) (A)
(A) (A) (A) (A) (A) (A) (A) (A) (A) (A) (A) (A)
(A) (A) (A) (A) (A) (A) (A) (A) (A) (A) (A) (A)
(A) (A) (A) (A) (A) (A) (A) (A) (A) (A) (A) (A)
(A) (A) (A) (A) (A) (A) (A) (A) (A) (A) (A) (A)
(A) (A) (A) (A) (A) (A) (A) (A) (A) (A) (A) (A)
(A) (A) (A) (A) (A) (A) (A) (A) (A) (A) (A) (A)
(A) (A) (A) (A) (A) (A) (A) (A) (A) (A) (A) (A)
(A) (A) (A) (A) (A) (A) (A) (A) (A) (A) (A) (A)
(A) (A) (A) (A) (A) (A) (A) (A) (A) (A) (A) (A)
(A) (A) (A) (A) (A) (A) (A) (A) (A) (A) (A) (A)
(A) (A) (A) (A) (A) (A) (A) (A) (A) (A) (A) (A)
(A) (A) (A) (A) (A) (A) (A) (A) (A) (A) (A) (A)
(A) (A) (A) (A) (A) (A) (A) (A) (A) (A) (A) (A)
(A) (A) (A) (A) (A) (A) (A) (A) (A) (A) (A) (A)
(A) (A) (A) (A) (A) (A) (A) (A) (A) (A) (A) (A)
(A) (A) (A) (A) (A) (A) (A) (A) (A) (A) (A) (A)
(A) (A) (A) (A) (A) (A) (A) (A) (A) (A) (A) (A)
(A) (A) (A) (A) (A) (A) (A) (A) (A) (A) (A) (A)
(A) (A) (A) (A) (A) (A) (A) (A) (A) (A) (A) (A)
(A) (A) (A) (A) (A) (A) (A) (A) (A) (A) (A) (A)
(A) (A) (A) (A) (A) (A) (A) (A) (A) (A) (A) (A)
(A) (A) (A) (A) (A) (A) (A) (A) (A)
400 initial guesses have been made.
Convergence on wavefunction: 0.001000000000000
Davidson Disk Diagonalization: ConvIn= 1.00D-03 SkipCon=T Conv= 1.00D-03.
Max sub-space: 6000 roots to seek: 400 dimension of matrix: 51552
Iteration 1 Dimension 400 NMult 0 NNew 400
CISAX will form 204 AO SS matrices at one time.
NMat= 204 NSing= 204 JSym2X= 0.
FoFJK: IHMeth= 1 ICntrl= 0 DoSepK=F KAlg= 0 I1Cent= 0 FoldK=F
IRaf= 880000000 NMat= 408 IRICut= 510 DoRegI=T DoRafI=T ISym2E= 0 IDoP0=3 IntGTp=3.
NMat= 196 NSing= 196 JSym2X= 0.
New state 2 was old state 3
New state 3 was old state 2
New state 12 was old state 13
New state 13 was old state 12
New state 14 was old state 20
New state 15 was old state 14
New state 16 was old state 25
New state 17 was old state 15
New state 18 was old state 19
New state 19 was old state 16
New state 20 was old state 18
New state 21 was old state 23
New state 23 was old state 31
New state 24 was old state 21
New state 25 was old state 24
New state 26 was old state 28
New state 27 was old state 26
New state 28 was old state 27
New state 30 was old state 49
New state 31 was old state 44
New state 32 was old state 30
New state 35 was old state 32
New state 36 was old state 38
New state 37 was old state 35
New state 38 was old state 37
New state 39 was old state 36
New state 40 was old state 42
New state 41 was old state 40
New state 42 was old state 45
New state 43 was old state 41
New state 44 was old state 46
New state 45 was old state 50
New state 46 was old state 39
New state 48 was old state 43
New state 49 was old state 86
New state 50 was old state 69
New state 51 was old state 54
New state 54 was old state 51
New state 56 was old state 60
New state 57 was old state 56
New state 58 was old state 63
New state 59 was old state 58
New state 60 was old state 62
New state 61 was old state 66
New state 62 was old state 59
New state 63 was old state 57
New state 64 was old state 61
New state 66 was old state 74
New state 68 was old state 64
New state 69 was old state 70
New state 70 was old state 68
New state 71 was old state 73
New state 73 was old state 71
New state 74 was old state 95
New state 75 was old state 111
New state 77 was old state 79
New state 78 was old state 75
New state 79 was old state 91
New state 80 was old state 78
New state 81 was old state 77
New state 82 was old state 80
New state 83 was old state 84
New state 84 was old state 82
New state 85 was old state 83
New state 86 was old state 90
New state 87 was old state 88
New state 88 was old state 81
New state 89 was old state 93
New state 90 was old state 89
New state 91 was old state 92
New state 92 was old state 85
New state 93 was old state 87
New state 94 was old state 99
New state 95 was old state 98
New state 96 was old state 94
New state 97 was old state 102
New state 98 was old state 101
New state 99 was old state 96
New state 100 was old state 103
Excitation Energies [eV] at current iteration:
Root 1 : 3.932267187333414
Root 2 : 5.258459734359306
Root 3 : 5.501037109378009
Root 4 : 5.779154260567018
Root 5 : 6.015828186294156
Root 6 : 6.352477305283665
Root 7 : 6.496231292880482
Root 8 : 6.646252279318935
Root 9 : 6.795358953178382
Root 10 : 6.857541406437451
Root 11 : 6.985745820621482
Root 12 : 6.998673687925285
Root 13 : 7.058947768371636
Root 14 : 7.079517913212354
Root 15 : 7.101870303133071
Root 16 : 7.139457509058146
Root 17 : 7.182117731788186
Root 18 : 7.199182379277076
Root 19 : 7.212817722339976
Root 20 : 7.240664322571265
Root 21 : 7.303177416500664
Root 22 : 7.457905522385434
Root 23 : 7.478729275593353
Root 24 : 7.523313477376786
Root 25 : 7.571903941110515
Root 26 : 7.583811549635855
Root 27 : 7.626489057978718
Root 28 : 7.666422062122055
Root 29 : 7.688618635327513
Root 30 : 7.704825482550453
Root 31 : 7.741599866698946
Root 32 : 7.760932505170794
Root 33 : 7.775875734582062
Root 34 : 7.814297223350136
Root 35 : 7.850933076193788
Root 36 : 7.897367096942513
Root 37 : 7.930415062033557
Root 38 : 7.959969371488924
Root 39 : 8.016624313848457
Root 40 : 8.035512588173029
Root 41 : 8.071023985096620
Root 42 : 8.083889303019031
Root 43 : 8.086408851448841
Root 44 : 8.109562210755426
Root 45 : 8.125944940225954
Root 46 : 8.158448133089557
Root 47 : 8.163167890595821
Root 48 : 8.182870551446173
Root 49 : 8.199126990402647
Root 50 : 8.225407264232985
Root 51 : 8.241799607682609
Root 52 : 8.264877523414944
Root 53 : 8.275088272693617
Root 54 : 8.293333782204270
Root 55 : 8.316082074930902
Root 56 : 8.346367723160704
Root 57 : 8.382555570863186
Root 58 : 8.401109132244004
Root 59 : 8.412500399965072
Root 60 : 8.414165895140721
Root 61 : 8.434238875188331
Root 62 : 8.447319681887615
Root 63 : 8.468935923021496
Root 64 : 8.483246373667381
Root 65 : 8.489449701736477
Root 66 : 8.528161035272662
Root 67 : 8.554968003686891
Root 68 : 8.560837623968141
Root 69 : 8.572602365464327
Root 70 : 8.581669282751509
Root 71 : 8.598492883145544
Root 72 : 8.621537815660947
Root 73 : 8.630431077988780
Root 74 : 8.642432419370085
Root 75 : 8.650156667026463
Root 76 : 8.669529566102591
Root 77 : 8.686178611637752
Root 78 : 8.693795752832155
Root 79 : 8.717228878462368
Root 80 : 8.747621709121844
Root 81 : 8.764753493146149
Root 82 : 8.778827558782508
Root 83 : 8.784585329830144
Root 84 : 8.801886602853681
Root 85 : 8.812468947856509
Root 86 : 8.833455002617312
Root 87 : 8.854807429080710
Root 88 : 8.858053010437818
Root 89 : 8.864168438084622
Root 90 : 8.892314914212481
Root 91 : 8.894935502354800
Root 92 : 8.897435604610356
Root 93 : 8.918436662582760
Root 94 : 8.948235858781262
Root 95 : 8.949909048499803
Root 96 : 8.993309421206051
Root 97 : 9.012874348561258
Root 98 : 9.021328800414032
Root 99 : 9.028599053225218
Root 100 : 9.046827851302481
Root 101 : 9.054753636150700
Root 102 : 9.067039115673365
Root 103 : 9.080033720325591
Root 104 : 9.089024246737942
Root 105 : 9.098860025178036
Root 106 : 9.111902190827360
Root 107 : 9.119760189708815
Root 108 : 9.132577864584341
Root 109 : 9.140809334853040
Root 110 : 9.153790026118308
Root 111 : 9.166038430742573
Root 112 : 9.180542319418784
Root 113 : 9.187594459554315
Root 114 : 9.191111343962158
Root 115 : 9.206286842658658
Root 116 : 9.208934112435955
Root 117 : 9.219013735210812
Root 118 : 9.234368966456129
Root 119 : 9.253641509479545
Root 120 : 9.255121886904032
Root 121 : 9.267042677867551
Root 122 : 9.271004943361580
Root 123 : 9.288559176148130
Root 124 : 9.293981898168596
Root 125 : 9.296347439546837
Root 126 : 9.306637490441119
Root 127 : 9.311662589788972
Root 128 : 9.326474251425484
Root 129 : 9.338548816756003
Root 130 : 9.349261584683376
Root 131 : 9.385698227286364
Root 132 : 9.390531399499991
Root 133 : 9.402371057254909
Root 134 : 9.413226624325137
Root 135 : 9.426234070756108
Root 136 : 9.436249758053691
Root 137 : 9.447251820929132
Root 138 : 9.457150824951352
Root 139 : 9.466282570008222
Root 140 : 9.471233150124119
Root 141 : 9.479008622766026
Root 142 : 9.490518026894385
Root 143 : 9.496839913412130
Root 144 : 9.502950010923950
Root 145 : 9.506139694772260
Root 146 : 9.520971679177388
Root 147 : 9.539378675076671
Root 148 : 9.547028399804963
Root 149 : 9.560947991679141
Root 150 : 9.569529097894740
Root 151 : 9.578728150398922
Root 152 : 9.585518730966738
Root 153 : 9.599765789136002
Root 154 : 9.617326759475096
Root 155 : 9.623826052466818
Root 156 : 9.633951189684330
Root 157 : 9.638460966675249
Root 158 : 9.643370185060396
Root 159 : 9.646288912940760
Root 160 : 9.655938950779261
Root 161 : 9.664728813387125
Root 162 : 9.667770966750473
Root 163 : 9.672868134149718
Root 164 : 9.675486521375806
Root 165 : 9.699357516276208
Root 166 : 9.706562107243268
Root 167 : 9.716040271044662
Root 168 : 9.722498791052448
Root 169 : 9.739237752868085
Root 170 : 9.740082100680475
Root 171 : 9.744722690194779
Root 172 : 9.752713339734923
Root 173 : 9.773528913415209
Root 174 : 9.777235493741189
Root 175 : 9.794202392859276
Root 176 : 9.798580091740247
Root 177 : 9.804701214653926
Root 178 : 9.815192829993915
Root 179 : 9.825527721874272
Root 180 : 9.831052109506023
Root 181 : 9.837303545174644
Root 182 : 9.846597768647689
Root 183 : 9.860414524298559
Root 184 : 9.862943166490679
Root 185 : 9.882233555748078
Root 186 : 9.885288679787591
Root 187 : 9.892892693716899
Root 188 : 9.899766751193798
Root 189 : 9.905279271493541
Root 190 : 9.926099585370974
Root 191 : 9.933190096214499
Root 192 : 9.940397033017009
Root 193 : 9.951151775540298
Root 194 : 9.962171308597275
Root 195 : 9.971870029365913
Root 196 : 9.982142777440043
Root 197 : 9.984699596351803
Root 198 : 9.996634039921490
Root 199 : 9.999750107431890
Root 200 : 10.010709553787349
Root 201 : 10.019213226194037
Root 202 : 10.023003077186647
Root 203 : 10.029362068556406
Root 204 : 10.033570356113017
Root 205 : 10.039937112874378
Root 206 : 10.048539977987151
Root 207 : 10.056138414362218
Root 208 : 10.060947132281145
Root 209 : 10.071632411753454
Root 210 : 10.074206989645610
Root 211 : 10.075495653809201
Root 212 : 10.086191662006835
Root 213 : 10.104884147162867
Root 214 : 10.112724507563428
Root 215 : 10.135427491123453
Root 216 : 10.137751313972938
Root 217 : 10.148698577573793
Root 218 : 10.152975658317438
Root 219 : 10.168793021458029
Root 220 : 10.183983312403145
Root 221 : 10.188875390643542
Root 222 : 10.195159742704744
Root 223 : 10.196499102321967
Root 224 : 10.209733736925299
Root 225 : 10.219636974419380
Root 226 : 10.226293539811003
Root 227 : 10.229189472254792
Root 228 : 10.232994619866187
Root 229 : 10.241024025441025
Root 230 : 10.249763615845334
Root 231 : 10.256172191297969
Root 232 : 10.260798832684126
Root 233 : 10.263937566957383
Root 234 : 10.268564074313746
Root 235 : 10.277104405738774
Root 236 : 10.284724714347238
Root 237 : 10.289297237345092
Root 238 : 10.290636180691335
Root 239 : 10.295814498861281
Root 240 : 10.305154226482347
Root 241 : 10.309383651377361
Root 242 : 10.313562851060345
Root 243 : 10.317904232790449
Root 244 : 10.322655193078953
Root 245 : 10.331365963845489
Root 246 : 10.335444575861809
Root 247 : 10.346955393926399
Root 248 : 10.356346507533244
Root 249 : 10.366851057953200
Root 250 : 10.375648016205547
Root 251 : 10.390408691864458
Root 252 : 10.401204067288619
Root 253 : 10.404279838508758
Root 254 : 10.407233540072040
Root 255 : 10.416664952617630
Root 256 : 10.424313615367742
Root 257 : 10.426430112446123
Root 258 : 10.436906880834457
Root 259 : 10.446434655569421
Root 260 : 10.447616495654312
Root 261 : 10.454796745750762
Root 262 : 10.457988988598489
Root 263 : 10.460010048395009
Root 264 : 10.473504882113199
Root 265 : 10.477167556002806
Root 266 : 10.479388331256461
Root 267 : 10.491810054660482
Root 268 : 10.495943844768362
Root 269 : 10.502223436458589
Root 270 : 10.506092297507104
Root 271 : 10.512100865619725
Root 272 : 10.519679137254860
Root 273 : 10.529404885624357
Root 274 : 10.539205006830773
Root 275 : 10.540472587003457
Root 276 : 10.552555352818946
Root 277 : 10.561543250186800
Root 278 : 10.571035921702993
Root 279 : 10.575246788572047
Root 280 : 10.579262043051157
Root 281 : 10.588183891612610
Root 282 : 10.591354250501682
Root 283 : 10.603560415382729
Root 284 : 10.613647301036028
Root 285 : 10.617270897591474
Root 286 : 10.628557688605602
Root 287 : 10.632929419139408
Root 288 : 10.636672708582843
Root 289 : 10.649229852449174
Root 290 : 10.654684257990073
Root 291 : 10.657923480773682
Root 292 : 10.669053745112917
Root 293 : 10.671117369876766
Root 294 : 10.679554630777165
Root 295 : 10.681646625904161
Root 296 : 10.684219554088656
Root 297 : 10.687035938634180
Root 298 : 10.690374696331135
Root 299 : 10.697400282695476
Root 300 : 10.703116438285106
Root 301 : 10.710969269040188
Root 302 : 10.714259721093010
Root 303 : 10.716850567984915
Root 304 : 10.721073490617067
Root 305 : 10.733591550194312
Root 306 : 10.736801032261814
Root 307 : 10.747193133376896
Root 308 : 10.754535078925249
Root 309 : 10.756544579280950
Root 310 : 10.763051211933981
Root 311 : 10.771205929564140
Root 312 : 10.774209869167050
Root 313 : 10.784896723999999
Root 314 : 10.796913845207641
Root 315 : 10.803601791686242
Root 316 : 10.808291193488618
Root 317 : 10.811713762428582
Root 318 : 10.815284186053697
Root 319 : 10.825985863047823
Root 320 : 10.832263501217366
Root 321 : 10.835456764865556
Root 322 : 10.842433372173938
Root 323 : 10.845298587565093
Root 324 : 10.849074753586644
Root 325 : 10.853238547451468
Root 326 : 10.858503758047426
Root 327 : 10.867089081611327
Root 328 : 10.870186428476234
Root 329 : 10.873649553877662
Root 330 : 10.876254708647219
Root 331 : 10.878971600082657
Root 332 : 10.896859135886904
Root 333 : 10.900811339093860
Root 334 : 10.904411847657061
Root 335 : 10.915207230144993
Root 336 : 10.919341771424227
Root 337 : 10.927812050683471
Root 338 : 10.929846570786841
Root 339 : 10.936461353413984
Root 340 : 10.939710252415555
Root 341 : 10.944233093242108
Root 342 : 10.951916481813019
Root 343 : 10.957409230031747
Root 344 : 10.961867251150752
Root 345 : 10.963812369130075
Root 346 : 10.970627509316513
Root 347 : 10.977894459806445
Root 348 : 10.986117078617333
Root 349 : 10.990678145173916
Root 350 : 11.002777380369650
Root 351 : 11.009169721726066
Root 352 : 11.023429392231542
Root 353 : 11.025190985747642
Root 354 : 11.030513116502949
Root 355 : 11.033211575799216
Root 356 : 11.044459125056674
Root 357 : 11.047115120004095
Root 358 : 11.055371873035424
Root 359 : 11.061323904114897
Root 360 : 11.063819154385943
Root 361 : 11.070005034824479
Root 362 : 11.077558053863427
Root 363 : 11.079566676232126
Root 364 : 11.083316698614926
Root 365 : 11.091847176953308
Root 366 : 11.097972541650487
Root 367 : 11.105281649227269
Root 368 : 11.105929108883892
Root 369 : 11.110082743602598
Root 370 : 11.115823194741424
Root 371 : 11.118527874553092
Root 372 : 11.130080243223091
Root 373 : 11.132473177028348
Root 374 : 11.148899575072745
Root 375 : 11.149850195123076
Root 376 : 11.157337706471790
Root 377 : 11.166722359399017
Root 378 : 11.182173833202098
Root 379 : 11.183896548983400
Root 380 : 11.186705263034629
Root 381 : 11.191051612864598
Root 382 : 11.192810119143537
Root 383 : 11.198477542912114
Root 384 : 11.205746606268480
Root 385 : 11.209878511673226
Root 386 : 11.212646352016813
Root 387 : 11.217291306364123
Root 388 : 11.227843227056406
Root 389 : 11.229934761991123
Root 390 : 11.235770759139795
Root 391 : 11.242299627467736
Root 392 : 11.247643186270926
Root 393 : 11.256401155916743
Root 394 : 11.258896190673767
Root 395 : 11.276070978121499
Root 396 : 11.287367795772772
Root 397 : 11.292311762396698
Root 398 : 11.300846637711189
Root 399 : 11.352595986194709
Root 400 : 11.865217933238275
Iteration 2 Dimension 600 NMult 400 NNew 200
CISAX will form 200 AO SS matrices at one time.
NMat= 200 NSing= 200 JSym2X= 0.
Root 1 not converged, maximum delta is 0.005909175771187
New state 2 was old state 3
Root 2 not converged, maximum delta is 0.442595171180515
New state 3 was old state 2
Root 3 not converged, maximum delta is 0.367199983094512
Root 4 not converged, maximum delta is 0.147371235306132
Root 5 not converged, maximum delta is 0.076170445162534
Root 6 not converged, maximum delta is 0.208885013227696
Root 7 not converged, maximum delta is 0.159394315619056
Root 8 not converged, maximum delta is 0.019504951255086
New state 9 was old state 10
Root 9 not converged, maximum delta is 0.179704402930107
New state 10 was old state 9
Root 10 not converged, maximum delta is 0.032659820915184
Root 11 not converged, maximum delta is 0.188035434205667
Root 12 not converged, maximum delta is 0.131191169681033
New state 13 was old state 14
Root 13 not converged, maximum delta is 0.310658750346820
New state 14 was old state 13
Root 14 not converged, maximum delta is 0.178884636135174
Root 15 not converged, maximum delta is 0.103201764769097
Root 16 not converged, maximum delta is 0.172454762236574
Root 17 not converged, maximum delta is 0.105960101685736
Root 18 not converged, maximum delta is 0.086191013259578
Root 19 not converged, maximum delta is 0.112028441048323
Root 20 not converged, maximum delta is 0.108894629629674
Root 21 not converged, maximum delta is 0.060864953492238
New state 22 was old state 23
Root 22 not converged, maximum delta is 0.298331259024215
New state 23 was old state 22
Root 23 not converged, maximum delta is 0.337561688685631
Root 24 not converged, maximum delta is 0.062405285455096
Root 25 not converged, maximum delta is 0.131395826994378
Root 26 not converged, maximum delta is 0.097166956874602
Root 27 not converged, maximum delta is 0.101343572876870
New state 28 was old state 29
Root 28 not converged, maximum delta is 0.241702489064016
New state 29 was old state 30
Root 29 not converged, maximum delta is 0.173579349645779
New state 30 was old state 28
Root 30 not converged, maximum delta is 0.240497465337931
Root 31 not converged, maximum delta is 0.143955081421596
Root 32 not converged, maximum delta is 0.167359233862220
Root 33 not converged, maximum delta is 0.065521039172568
Root 34 not converged, maximum delta is 0.052829431743977
Root 35 not converged, maximum delta is 0.267302495220659
Root 36 not converged, maximum delta is 0.101218035327234
Root 37 not converged, maximum delta is 0.231957658502787
Root 38 not converged, maximum delta is 0.092903463171195
Root 39 not converged, maximum delta is 0.252107292207472
New state 40 was old state 41
Root 40 not converged, maximum delta is 0.333195959628598
New state 41 was old state 40
Root 41 not converged, maximum delta is 0.068983396138950
Root 42 not converged, maximum delta is 0.157347710924436
Root 43 not converged, maximum delta is 0.287523215906421
Root 44 not converged, maximum delta is 0.254866270614067
New state 45 was old state 50
Root 45 not converged, maximum delta is 0.426593134820080
New state 46 was old state 45
Root 46 not converged, maximum delta is 0.062700209196408
New state 47 was old state 49
Root 47 not converged, maximum delta is 0.123737583456963
New state 48 was old state 46
Root 48 not converged, maximum delta is 0.241556002887078
New state 49 was old state 47
Root 49 not converged, maximum delta is 0.195946940390123
New state 50 was old state 48
Root 50 not converged, maximum delta is 0.160280622864479
New state 51 was old state 53
Root 51 not converged, maximum delta is 0.475747091181265
New state 52 was old state 51
Root 52 not converged, maximum delta is 0.150216577719235
New state 53 was old state 52
Root 53 not converged, maximum delta is 0.047235032928816
Root 54 not converged, maximum delta is 0.123773637009421
Root 55 not converged, maximum delta is 0.455718406884459
Root 56 not converged, maximum delta is 0.268300263855332
New state 57 was old state 58
Root 57 not converged, maximum delta is 0.290788584444282
New state 58 was old state 57
Root 58 not converged, maximum delta is 0.288112852128644
Root 59 not converged, maximum delta is 0.332193640893533
Root 60 not converged, maximum delta is 0.329768520084367
New state 61 was old state 63
Root 61 not converged, maximum delta is 0.326840747286606
New state 62 was old state 61
Root 62 not converged, maximum delta is 0.136306722032727
New state 63 was old state 62
Root 63 not converged, maximum delta is 0.089183518080209
Root 64 not converged, maximum delta is 0.275184802029400
Root 65 not converged, maximum delta is 0.257230885273408
Root 66 not converged, maximum delta is 0.096110250301248
Root 67 not converged, maximum delta is 0.248773389212145
New state 68 was old state 69
Root 68 not converged, maximum delta is 0.288114157500603
New state 69 was old state 68
Root 69 not converged, maximum delta is 0.372964007311606
Root 70 not converged, maximum delta is 0.066598209332995
Root 71 not converged, maximum delta is 0.201340027071524
Root 72 not converged, maximum delta is 0.380753154210020
Root 73 not converged, maximum delta is 0.481702396666258
Root 74 not converged, maximum delta is 0.262501404384017
Root 75 not converged, maximum delta is 0.162090929701494
Root 76 not converged, maximum delta is 0.046344318816617
Root 77 not converged, maximum delta is 0.057923821886861
Root 78 not converged, maximum delta is 0.120422731905437
Root 79 not converged, maximum delta is 0.157203671292104
Root 80 not converged, maximum delta is 0.080563367464500
Root 81 not converged, maximum delta is 0.120695957071197
New state 82 was old state 83
Root 82 not converged, maximum delta is 0.151221319857600
New state 83 was old state 82
Root 83 not converged, maximum delta is 0.132212681139572
Root 84 not converged, maximum delta is 0.244972285972921
Root 85 not converged, maximum delta is 0.091336974743384
New state 86 was old state 87
Root 86 not converged, maximum delta is 0.245489225925300
New state 87 was old state 86
Root 87 not converged, maximum delta is 0.173213023178939
Root 88 not converged, maximum delta is 0.165946961197889
Root 89 not converged, maximum delta is 0.150489018900375
New state 90 was old state 91
Root 90 not converged, maximum delta is 0.112092458357114
New state 91 was old state 90
Root 91 not converged, maximum delta is 0.167542048111672
Root 92 not converged, maximum delta is 0.185518775444473
New state 93 was old state 102
Root 93 not converged, maximum delta is 0.363376616108252
New state 94 was old state 93
Root 94 not converged, maximum delta is 0.076782953566590
New state 95 was old state 94
Root 95 not converged, maximum delta is 0.135999749234559
New state 96 was old state 95
Root 96 not converged, maximum delta is 0.129831065239896
New state 97 was old state 96
Root 97 not converged, maximum delta is 0.109827307338714
New state 98 was old state 97
Root 98 not converged, maximum delta is 0.259902129951311
Root 99 not converged, maximum delta is 0.403454387560793
New state 100 was old state 98
Root 100 not converged, maximum delta is 0.162850593731429
Excitation Energies [eV] at current iteration:
Root 1 : 3.877642106920555 Change is -0.054625080412859
Root 2 : 5.059205050464243 Change is -0.441832058913766
Root 3 : 5.303160385617706 Change is 0.044700651258400
Root 4 : 5.692346759648325 Change is -0.086807500918692
Root 5 : 5.975927348696845 Change is -0.039900837597311
Root 6 : 6.308859406603499 Change is -0.043617898680166
Root 7 : 6.416098767765299 Change is -0.080132525115182
Root 8 : 6.624743223177772 Change is -0.021509056141163
Root 9 : 6.729654673884310 Change is -0.127886732553141
Root 10 : 6.770963132831316 Change is -0.024395820347066
Root 11 : 6.961293523029570 Change is -0.024452297591913
Root 12 : 6.979094129353610 Change is -0.019579558571676
Root 13 : 7.035017922895384 Change is -0.044499990316970
Root 14 : 7.050378775327530 Change is -0.008568993044106
Root 15 : 7.078309002985946 Change is -0.023561300147126
Root 16 : 7.110569354038499 Change is -0.028888155019647
Root 17 : 7.158984312990176 Change is -0.023133418798010
Root 18 : 7.167879592157113 Change is -0.031302787119963
Root 19 : 7.196756289270674 Change is -0.016061433069302
Root 20 : 7.220066247504129 Change is -0.020598075067135
Root 21 : 7.271213757630469 Change is -0.031963658870195
Root 22 : 7.429982658137948 Change is -0.048746617455405
Root 23 : 7.442573963631480 Change is -0.015331558753954
Root 24 : 7.506565495499494 Change is -0.016747981877292
Root 25 : 7.546026616540504 Change is -0.025877324570010
Root 26 : 7.553279323628626 Change is -0.030532226007229
Root 27 : 7.604541943906582 Change is -0.021947114072136
Root 28 : 7.626623622380254 Change is -0.061995012947259
Root 29 : 7.639039163417578 Change is -0.065786319132875
Root 30 : 7.657813505465023 Change is -0.008608556657032
Root 31 : 7.711330780121891 Change is -0.030269086577056
Root 32 : 7.735331193812775 Change is -0.025601311358018
Root 33 : 7.761478718022540 Change is -0.014397016559522
Root 34 : 7.789495405243351 Change is -0.024801818106784
Root 35 : 7.805380332150309 Change is -0.045552744043478
Root 36 : 7.873596207545228 Change is -0.023770889397285
Root 37 : 7.889263514472460 Change is -0.041151547561097
Root 38 : 7.938568719605036 Change is -0.021400651883887
Root 39 : 7.952882806611185 Change is -0.063741507237272
Root 40 : 7.983221674622220 Change is -0.087802310474399
Root 41 : 8.015230860951174 Change is -0.020281727221854
Root 42 : 8.065803046592308 Change is -0.018086256426724
Root 43 : 8.069258814033077 Change is -0.017150037415764
Root 44 : 8.094345789718698 Change is -0.015216421036727
Root 45 : 8.099670222717480 Change is -0.125737041515505
Root 46 : 8.109809620734856 Change is -0.016135319491099
Root 47 : 8.126176390944190 Change is -0.072950599458456
Root 48 : 8.135966772991507 Change is -0.022481360098051
Root 49 : 8.149507749264114 Change is -0.013660141331707
Root 50 : 8.158565354681325 Change is -0.024305196764848
Root 51 : 8.202262245536200 Change is -0.072826027157417
Root 52 : 8.217269084047670 Change is -0.024530523634938
Root 53 : 8.237025345528695 Change is -0.027852177886247
Root 54 : 8.270031141611067 Change is -0.023302640593202
Root 55 : 8.275936028127264 Change is -0.040146046803639
Root 56 : 8.306253222473442 Change is -0.040114500687262
Root 57 : 8.350185476719073 Change is -0.050923655524932
Root 58 : 8.366862094075875 Change is -0.015693476787311
Root 59 : 8.384027356228282 Change is -0.028473043736792
Root 60 : 8.391249512119206 Change is -0.022916383021516
Root 61 : 8.395381699614413 Change is -0.073554223407082
Root 62 : 8.414885090499039 Change is -0.019353784689291
Root 63 : 8.432623307048454 Change is -0.014696374839162
Root 64 : 8.465575202630784 Change is -0.017671171036597
Root 65 : 8.471300486050000 Change is -0.018149215686479
Root 66 : 8.505515911139552 Change is -0.022645124133110
Root 67 : 8.526839828393294 Change is -0.028128175293598
Root 68 : 8.534303430773370 Change is -0.038298934690958
Root 69 : 8.538100006765074 Change is -0.022737617203065
Root 70 : 8.565114001733287 Change is -0.016555281018224
Root 71 : 8.569081944244548 Change is -0.029410938900997
Root 72 : 8.589444307327204 Change is -0.032093508333743
Root 73 : 8.603579505403554 Change is -0.026851572585226
Root 74 : 8.614131251451477 Change is -0.028301167918608
Root 75 : 8.623983437096332 Change is -0.026173229930132
Root 76 : 8.656124457094938 Change is -0.013405109007653
Root 77 : 8.662920386299442 Change is -0.023258225338309
Root 78 : 8.673926443974626 Change is -0.019869308857529
Root 79 : 8.691594347577018 Change is -0.025634530885349
Root 80 : 8.719399367322234 Change is -0.028222341799610
Root 81 : 8.733338111543024 Change is -0.031415381603125
Root 82 : 8.747917352189431 Change is -0.036667977640714
Root 83 : 8.753436768055927 Change is -0.025390790726580
Root 84 : 8.766971818330367 Change is -0.034914784523315
Root 85 : 8.790815293411200 Change is -0.021653654445309
Root 86 : 8.796158802184900 Change is -0.058648626895809
Root 87 : 8.810209621826271 Change is -0.023245380791040
Root 88 : 8.833698507979600 Change is -0.024354502458219
Root 89 : 8.838241659860113 Change is -0.025926778224508
Root 90 : 8.863681721926397 Change is -0.031253780428401
Root 91 : 8.868168477722506 Change is -0.024146436489975
Root 92 : 8.873170434758952 Change is -0.024265169851403
Root 93 : 8.887491368029727 Change is -0.179547747643640
Root 94 : 8.895511601522022 Change is -0.022925061060739
Root 95 : 8.918570200071754 Change is -0.029665658709508
Root 96 : 8.929857351522633 Change is -0.020051696977169
Root 97 : 8.963971905658804 Change is -0.029337515547247
Root 98 : 8.986032765414233 Change is -0.026841583147025
Root 99 : 8.991619266812986 Change is -0.036979786412231
Root 100 : 9.006460274883871 Change is -0.014868525530163
Iteration 3 Dimension 800 NMult 600 NNew 200
CISAX will form 200 AO SS matrices at one time.
NMat= 200 NSing= 200 JSym2X= 0.
Root 1 has converged.
Root 2 not converged, maximum delta is 0.003988584062360
Root 3 not converged, maximum delta is 0.003079627372164
Root 4 has converged.
Root 5 has converged.
Root 6 not converged, maximum delta is 0.002507383177362
Root 7 not converged, maximum delta is 0.002391269207264
Root 8 has converged.
Root 9 not converged, maximum delta is 0.002111173662197
Root 10 not converged, maximum delta is 0.001701348355213
Root 11 not converged, maximum delta is 0.001311464263838
Root 12 not converged, maximum delta is 0.001335721941902
Root 13 not converged, maximum delta is 0.004815027833046
Root 14 not converged, maximum delta is 0.003295749143367
Root 15 not converged, maximum delta is 0.002413261250438
Root 16 not converged, maximum delta is 0.001636847849296
Root 17 not converged, maximum delta is 0.002405951762680
Root 18 not converged, maximum delta is 0.002645118694435
Root 19 not converged, maximum delta is 0.002900344235848
Root 20 not converged, maximum delta is 0.002557865472186
Root 21 not converged, maximum delta is 0.001267578473814
Root 22 not converged, maximum delta is 0.003580152926261
Root 23 not converged, maximum delta is 0.004500650200103
Root 24 not converged, maximum delta is 0.001140661074311
Root 25 not converged, maximum delta is 0.004221039454885
Root 26 not converged, maximum delta is 0.003809400538980
Root 27 not converged, maximum delta is 0.007730802807225
Root 28 not converged, maximum delta is 0.009104230403692
Root 29 not converged, maximum delta is 0.007285562363757
Root 30 not converged, maximum delta is 0.007789953187180
Root 31 not converged, maximum delta is 0.003031861937233
Root 32 not converged, maximum delta is 0.005456568980201
Root 33 not converged, maximum delta is 0.002201314137178
Root 34 not converged, maximum delta is 0.002762817579557
Root 35 not converged, maximum delta is 0.005161870756907
Root 36 not converged, maximum delta is 0.003967820828285
Root 37 not converged, maximum delta is 0.004198513976613
Root 38 not converged, maximum delta is 0.006624124336621
Root 39 not converged, maximum delta is 0.034372355791461
Root 40 not converged, maximum delta is 0.022819664417010
Root 41 has converged.
Root 42 not converged, maximum delta is 0.001753846587676
Root 43 not converged, maximum delta is 0.003024369720884
Root 44 not converged, maximum delta is 0.052511117847471
Root 45 not converged, maximum delta is 0.045076094722375
Root 46 not converged, maximum delta is 0.003792477657383
Root 47 not converged, maximum delta is 0.011021532975080
Root 48 not converged, maximum delta is 0.009615466609436
Root 49 not converged, maximum delta is 0.013793321790904
Root 50 not converged, maximum delta is 0.015099350033573
Root 51 not converged, maximum delta is 0.004206399847751
Root 52 not converged, maximum delta is 0.004087523628683
Root 53 not converged, maximum delta is 0.001307689103883
Root 54 not converged, maximum delta is 0.007563585911538
Root 55 not converged, maximum delta is 0.008238111701313
Root 56 not converged, maximum delta is 0.001744972011382
Root 57 not converged, maximum delta is 0.005621669491201
Root 58 not converged, maximum delta is 0.009068899982739
Root 59 not converged, maximum delta is 0.021018014655630
Root 60 not converged, maximum delta is 0.069139468760349
Root 61 not converged, maximum delta is 0.062040389594282
Root 62 not converged, maximum delta is 0.006506750272338
Root 63 not converged, maximum delta is 0.001471187493093
Root 64 not converged, maximum delta is 0.008812264303717
Root 65 not converged, maximum delta is 0.008663757878777
Root 66 not converged, maximum delta is 0.003799754902061
Root 67 not converged, maximum delta is 0.009012764200161
Root 68 not converged, maximum delta is 0.027146907445606
Root 69 not converged, maximum delta is 0.025744197890841
Root 70 not converged, maximum delta is 0.006427726629651
Root 71 not converged, maximum delta is 0.011806416428839
Root 72 not converged, maximum delta is 0.012760745980587
Root 73 not converged, maximum delta is 0.004585939396570
Root 74 not converged, maximum delta is 0.005082910110252
Root 75 not converged, maximum delta is 0.004487643213337
Root 76 not converged, maximum delta is 0.002511617081869
Root 77 not converged, maximum delta is 0.003666168212964
Root 78 not converged, maximum delta is 0.006282607401596
Root 79 not converged, maximum delta is 0.008721826932685
Root 80 not converged, maximum delta is 0.003679304519412
Root 81 not converged, maximum delta is 0.006787307901028
Root 82 not converged, maximum delta is 0.008948342448868
Root 83 not converged, maximum delta is 0.004100765652514
Root 84 not converged, maximum delta is 0.007563056219220
Root 85 not converged, maximum delta is 0.047580177818458
Root 86 not converged, maximum delta is 0.039337427029352
Root 87 not converged, maximum delta is 0.011704505733213
Root 88 not converged, maximum delta is 0.005345241243235
Root 89 not converged, maximum delta is 0.004915255433903
Root 90 not converged, maximum delta is 0.014379479592381
Root 91 not converged, maximum delta is 0.054853109320590
Root 92 not converged, maximum delta is 0.015510342007612
Root 93 not converged, maximum delta is 0.033952408485720
Root 94 not converged, maximum delta is 0.014857422122901
Root 95 not converged, maximum delta is 0.026827313639321
Root 96 not converged, maximum delta is 0.011712359871760
Root 97 not converged, maximum delta is 0.010234191848539
Root 98 not converged, maximum delta is 0.026584539350030
Root 99 not converged, maximum delta is 0.024107682260993
Root 100 not converged, maximum delta is 0.034723072080415
Excitation Energies [eV] at current iteration:
Root 1 : 3.877063880830574 Change is -0.000578226089981
Root 2 : 5.055252756017953 Change is -0.003952294446290
Root 3 : 5.302415825643264 Change is -0.000744559974442
Root 4 : 5.691599075906802 Change is -0.000747683741524
Root 5 : 5.975377391451865 Change is -0.000549957244981
Root 6 : 6.308293533913141 Change is -0.000565872690357
Root 7 : 6.415038324394246 Change is -0.001060443371053
Root 8 : 6.624403570137005 Change is -0.000339653040767
Root 9 : 6.727490324469233 Change is -0.002164349415077
Root 10 : 6.770566700524483 Change is -0.000396432306833
Root 11 : 6.960840477563281 Change is -0.000453045466290
Root 12 : 6.978828533052426 Change is -0.000265596301183
Root 13 : 7.034295818552574 Change is -0.000722104342810
Root 14 : 7.050089105363246 Change is -0.000289669964283
Root 15 : 7.077884793941227 Change is -0.000424209044718
Root 16 : 7.110107471901166 Change is -0.000461882137333
Root 17 : 7.158708049694878 Change is -0.000276263295298
Root 18 : 7.167270922829649 Change is -0.000608669327464
Root 19 : 7.196402491673236 Change is -0.000353797597438
Root 20 : 7.219743164838372 Change is -0.000323082665758
Root 21 : 7.270672837574146 Change is -0.000540920056323
Root 22 : 7.429389064933012 Change is -0.000593593204936
Root 23 : 7.442161082709819 Change is -0.000412880921660
Root 24 : 7.506314315053905 Change is -0.000251180445589
Root 25 : 7.545402104900361 Change is -0.000624511640143
Root 26 : 7.552640804959703 Change is -0.000638518668923
Root 27 : 7.603986245426561 Change is -0.000555698480022
Root 28 : 7.625002626469963 Change is -0.001620995910291
Root 29 : 7.637533574965812 Change is -0.001505588451767
Root 30 : 7.657567289661124 Change is -0.000246215803900
Root 31 : 7.710616292947778 Change is -0.000714487174113
Root 32 : 7.734849907903675 Change is -0.000481285909101
Root 33 : 7.761280396443911 Change is -0.000198321578629
Root 34 : 7.788906453408834 Change is -0.000588951834517
Root 35 : 7.804342345497378 Change is -0.001037986652931
Root 36 : 7.873089412943939 Change is -0.000506794601289
Root 37 : 7.888408670520640 Change is -0.000854843951820
Root 38 : 7.938195094908152 Change is -0.000373624696885
Root 39 : 7.950198185537296 Change is -0.002684621073889
Root 40 : 7.979772164228122 Change is -0.003449510394098
Root 41 : 8.014756970536732 Change is -0.000473890414442
Root 42 : 8.065423435665000 Change is -0.000379610927306
Root 43 : 8.068881057678929 Change is -0.000377756354148
Root 44 : 8.093672734229431 Change is -0.000673055489268
Root 45 : 8.098565369422477 Change is -0.001104853295002
Root 46 : 8.109533366461701 Change is -0.000276254273156
Root 47 : 8.124504737906801 Change is -0.001671653037391
Root 48 : 8.135212977757433 Change is -0.000753795234072
Root 49 : 8.148823776811438 Change is -0.000683972452676
Root 50 : 8.157953079149994 Change is -0.000612275531330
Root 51 : 8.201423024016215 Change is -0.000839221519986
Root 52 : 8.216601970412736 Change is -0.000667113634935
Root 53 : 8.236376968295307 Change is -0.000648377233388
Root 54 : 8.269573393742071 Change is -0.000457747868996
Root 55 : 8.275345618179937 Change is -0.000590409947328
Root 56 : 8.305678979735120 Change is -0.000574242738323
Root 57 : 8.349369002956823 Change is -0.000816473762249
Root 58 : 8.366294620152122 Change is -0.000567473923754
Root 59 : 8.383306782688766 Change is -0.000720573539515
Root 60 : 8.390290648713380 Change is -0.000958863405825
Root 61 : 8.394373450429713 Change is -0.001008249184700
Root 62 : 8.414480649409461 Change is -0.000404441089578
Root 63 : 8.432317761922043 Change is -0.000305545126409
Root 64 : 8.465188340190632 Change is -0.000386862440151
Root 65 : 8.471060811347341 Change is -0.000239674702658
Root 66 : 8.504914456463988 Change is -0.000601454675564
Root 67 : 8.526079215344920 Change is -0.000760613048374
Root 68 : 8.533371441433097 Change is -0.000931989340273
Root 69 : 8.537521677607476 Change is -0.000578329157598
Root 70 : 8.564840426731010 Change is -0.000273575002276
Root 71 : 8.568201629766945 Change is -0.000880314477605
Root 72 : 8.588358329098568 Change is -0.001085978228635
Root 73 : 8.603010776347991 Change is -0.000568729055563
Root 74 : 8.613621595706803 Change is -0.000509655744673
Root 75 : 8.623372311678494 Change is -0.000611125417838
Root 76 : 8.655791302749593 Change is -0.000333154345344
Root 77 : 8.662379962503543 Change is -0.000540423795900
Root 78 : 8.673365437385650 Change is -0.000561006588976
Root 79 : 8.690993094011951 Change is -0.000601253565068
Root 80 : 8.718615424808768 Change is -0.000783942513467
Root 81 : 8.732522550011332 Change is -0.000815561531690
Root 82 : 8.746862884066852 Change is -0.001054468122578
Root 83 : 8.752692592473126 Change is -0.000744175582801
Root 84 : 8.766078704760943 Change is -0.000893113569424
Root 85 : 8.790145178629201 Change is -0.000670114781998
Root 86 : 8.793787303727761 Change is -0.002371498457140
Root 87 : 8.809477243250635 Change is -0.000732378575637
Root 88 : 8.833115078277393 Change is -0.000583429702207
Root 89 : 8.837601277918477 Change is -0.000640381941636
Root 90 : 8.862853598546447 Change is -0.000828123379950
Root 91 : 8.867218714254545 Change is -0.000949763467961
Root 92 : 8.872637742597107 Change is -0.000532692161846
Root 93 : 8.881095868138454 Change is -0.006395499891272
Root 94 : 8.894957313981465 Change is -0.000554287540557
Root 95 : 8.917310227106059 Change is -0.001259972965696
Root 96 : 8.929225885233452 Change is -0.000631466289182
Root 97 : 8.962413410318799 Change is -0.001558495340004
Root 98 : 8.985014082968828 Change is -0.001018682445405
Root 99 : 8.990631396009103 Change is -0.000987870803883
Root 100 : 9.004528567744911 Change is -0.001931707138960
Iteration 4 Dimension 990 NMult 800 NNew 190
CISAX will form 190 AO SS matrices at one time.
NMat= 190 NSing= 190 JSym2X= 0.
Root 1 has converged.
Root 2 has converged.
Root 3 has converged.
Root 4 has converged.
Root 5 has converged.
Root 6 has converged.
Root 7 has converged.
Root 8 has converged.
Root 9 has converged.
Root 10 has converged.
Root 11 has converged.
Root 12 has converged.
Root 13 has converged.
Root 14 has converged.
Root 15 has converged.
Root 16 has converged.
Root 17 has converged.
Root 18 has converged.
Root 19 has converged.
Root 20 has converged.
Root 21 has converged.
Root 22 has converged.
Root 23 has converged.
Root 24 has converged.
Root 25 has converged.
Root 26 has converged.
Root 27 has converged.
Root 28 has converged.
Root 29 has converged.
Root 30 has converged.
Root 31 has converged.
Root 32 has converged.
Root 33 has converged.
Root 34 has converged.
Root 35 has converged.
Root 36 has converged.
Root 37 has converged.
Root 38 has converged.
Root 39 not converged, maximum delta is 0.002583475186653
Root 40 not converged, maximum delta is 0.001578219919719
Root 41 has converged.
Root 42 has converged.
Root 43 has converged.
Root 44 not converged, maximum delta is 0.003524609005695
Root 45 not converged, maximum delta is 0.003039150707261
Root 46 has converged.
Root 47 has converged.
Root 48 has converged.
Root 49 has converged.
Root 50 not converged, maximum delta is 0.001002122312383
Root 51 has converged.
Root 52 has converged.
Root 53 has converged.
Root 54 has converged.
Root 55 has converged.
Root 56 has converged.
Root 57 has converged.
Root 58 has converged.
Root 59 not converged, maximum delta is 0.001401462837288
Root 60 not converged, maximum delta is 0.003794443654823
Root 61 not converged, maximum delta is 0.003152859875184
Root 62 has converged.
Root 63 has converged.
Root 64 has converged.
Root 65 has converged.
Root 66 has converged.
Root 67 has converged.
Root 68 not converged, maximum delta is 0.001987125475264
Root 69 not converged, maximum delta is 0.001968376385240
Root 70 has converged.
Root 71 has converged.
Root 72 has converged.
Root 73 has converged.
Root 74 has converged.
Root 75 has converged.
Root 76 has converged.
Root 77 has converged.
Root 78 has converged.
Root 79 has converged.
Root 80 has converged.
Root 81 has converged.
Root 82 has converged.
Root 83 has converged.
Root 84 has converged.
Root 85 not converged, maximum delta is 0.003863565586442
Root 86 not converged, maximum delta is 0.003437687168054
Root 87 has converged.
Root 88 has converged.
Root 89 has converged.
Root 90 has converged.
Root 91 not converged, maximum delta is 0.001821726015439
Root 92 has converged.
Root 93 not converged, maximum delta is 0.001187373272401
Root 94 has converged.
Root 95 has converged.
Root 96 has converged.
Root 97 has converged.
Root 98 not converged, maximum delta is 0.001823733705881
Root 99 not converged, maximum delta is 0.002923861996841
Root 100 not converged, maximum delta is 0.006486002205546
Excitation Energies [eV] at current iteration:
Root 1 : 3.877059661591642 Change is -0.000004219238933
Root 2 : 5.055183588368887 Change is -0.000069167649066
Root 3 : 5.302401437257219 Change is -0.000014388386045
Root 4 : 5.691583249131590 Change is -0.000015826775213
Root 5 : 5.975363992823648 Change is -0.000013398628217
Root 6 : 6.308275153708909 Change is -0.000018380204233
Root 7 : 6.415001520081105 Change is -0.000036804313141
Root 8 : 6.624390451511876 Change is -0.000013118625129
Root 9 : 6.727405563323142 Change is -0.000084761146091
Root 10 : 6.770550563342117 Change is -0.000016137182365
Root 11 : 6.960819022535853 Change is -0.000021455027427
Root 12 : 6.978815866985771 Change is -0.000012666066655
Root 13 : 7.034260503247310 Change is -0.000035315305264
Root 14 : 7.050075759376408 Change is -0.000013345986838
Root 15 : 7.077861898990653 Change is -0.000022894950575
Root 16 : 7.110089093843015 Change is -0.000018378058151
Root 17 : 7.158695478944300 Change is -0.000012570750578
Root 18 : 7.167244959596369 Change is -0.000025963233281
Root 19 : 7.196385962429165 Change is -0.000016529244072
Root 20 : 7.219727622076016 Change is -0.000015542762355
[truncated: 2,746 more rows]

## Sheet: 6-CONF_2_ecd
Entering Gaussian System, Link 0=g16
Input=CONF_2_ecd.com
Output=CONF_2_ecd.log
Initial command:
/public/apps/g16/l1.exe "scr.176.master/Gau-117301.inp" -scrdir="scr.176.master/"
Default is to use a total of 12 processors:
12 via shared-memory
1 via Linda
Entering Link 1 = /public/apps/g16/l1.exe PID= 117302.
Copyright (c) 1988-2019, Gaussian, Inc. All Rights Reserved.
This is part of the Gaussian(R) 16 program. It is based on
the Gaussian(R) 09 system (copyright 2009, Gaussian, Inc.),
the Gaussian(R) 03 system (copyright 2003, Gaussian, Inc.),
the Gaussian(R) 98 system (copyright 1998, Gaussian, Inc.),
the Gaussian(R) 94 system (copyright 1995, Gaussian, Inc.),
the Gaussian 92(TM) system (copyright 1992, Gaussian, Inc.),
the Gaussian 90(TM) system (copyright 1990, Gaussian, Inc.),
the Gaussian 88(TM) system (copyright 1988, Gaussian, Inc.),
the Gaussian 86(TM) system (copyright 1986, Carnegie Mellon
University), and the Gaussian 82(TM) system (copyright 1983,
Carnegie Mellon University). Gaussian is a federally registered
trademark of Gaussian, Inc.
This software contains proprietary and confidential information,
including trade secrets, belonging to Gaussian, Inc.
This software is provided under written license and may be
used, copied, transmitted, or stored only in accord with that
written license.
The following legend is applicable only to US Government
contracts under FAR:
RESTRICTED RIGHTS LEGEND
Use, reproduction and disclosure by the US Government is
subject to restrictions as set forth in subparagraphs (a)
and (c) of the Commercial Computer Software - Restricted
Rights clause in FAR 52.227-19.
Gaussian, Inc.
340 Quinnipiac St., Bldg. 40, Wallingford CT 06492
---------------------------------------------------------------
Warning -- This program may not be used in any manner that
competes with the business of Gaussian, Inc. or will provide
assistance to any competitor of Gaussian, Inc. The licensee
of this program is prohibited from giving any competitor of
Gaussian, Inc. access to this program. By using this program,
the user acknowledges that Gaussian, Inc. is engaged in the
business of creating and licensing software in the field of
computational chemistry and represents and warrants to the
licensee that it is not a competitor of Gaussian, Inc. and that
it will not use this program in any manner prohibited above.
---------------------------------------------------------------
Cite this work as:
Gaussian 16, Revision C.01,
M. J. Frisch, G. W. Trucks, H. B. Schlegel, G. E. Scuseria,
M. A. Robb, J. R. Cheeseman, G. Scalmani, V. Barone,
G. A. Petersson, H. Nakatsuji, X. Li, M. Caricato, A. V. Marenich,
J. Bloino, B. G. Janesko, R. Gomperts, B. Mennucci, H. P. Hratchian,
J. V. Ortiz, A. F. Izmaylov, J. L. Sonnenberg, D. Williams-Young,
F. Ding, F. Lipparini, F. Egidi, J. Goings, B. Peng, A. Petrone,
T. Henderson, D. Ranasinghe, V. G. Zakrzewski, J. Gao, N. Rega,
G. Zheng, W. Liang, M. Hada, M. Ehara, K. Toyota, R. Fukuda,
J. Hasegawa, M. Ishida, T. Nakajima, Y. Honda, O. Kitao, H. Nakai,
T. Vreven, K. Throssell, J. A. Montgomery, Jr., J. E. Peralta,
F. Ogliaro, M. J. Bearpark, J. J. Heyd, E. N. Brothers, K. N. Kudin,
V. N. Staroverov, T. A. Keith, R. Kobayashi, J. Normand,
K. Raghavachari, A. P. Rendell, J. C. Burant, S. S. Iyengar,
J. Tomasi, M. Cossi, J. M. Millam, M. Klene, C. Adamo, R. Cammi,
J. W. Ochterski, R. L. Martin, K. Morokuma, O. Farkas,
J. B. Foresman, and D. J. Fox, Gaussian, Inc., Wallingford CT, 2019.
******************************************
Gaussian 16: ES64L-G16RevC.01 3-Jul-2019
27-May-2020
******************************************
%oldchk=CONF_2_min.chk
%chk=CONF_2_ecd.chk
Copying data from "CONF_2_min.chk" to current chk file "CONF_2_ecd.chk"
IOpt= 2 FromEx=T IUOpen= 4 IOptOp= 5 NList= 0 IFRang= 0 IUIn= 4 IUOut= 2.
----------------------------------------------------------------------
#P td=(nstates=100) APFD/6-311+g(2d,p) guess=read geom=allcheck integr
al(ultrafinegrid) scrf=check
----------------------------------------------------------------------
1/29=7,38=1,40=1,172=1/1;
2/12=2,40=1/2;
3/5=4,6=6,7=112,11=9,14=-4,25=1,30=1,70=2,74=-44,75=-5,116=-2/1,2,3,8;
4/5=1/1;
5/5=2,38=6/2;
8/6=1,10=2,108=100/1;
9/41=100,42=1,70=2/14;
6/7=2,8=2,9=2,10=2/1;
99/5=1,9=1/99;
Leave Link 1 at Wed May 27 10:52:44 2020, MaxMem= 3221225472 cpu: 1.2 elap: 0.1
(Enter /public/apps/g16/l101.exe)
Structure from the checkpoint file: "CONF_2_ecd.chk"
-----
*****
-----
Charge = 0 Multiplicity = 1
Redundant internal coordinates found in file. (old form).
C,0,1.5569919094,2.048545369,-0.7120431368
C,0,2.3481730184,0.8315548175,-0.2486433026
C,0,1.580102837,-0.4744998124,-0.4649979179
C,0,0.2082392261,-0.3748158229,0.2342044519
C,0,-0.570675214,0.8619861596,-0.2276193299
C,0,0.1997896018,2.1776709903,-0.0199761545
C,0,-0.6322750895,-1.6004035351,0.0542517086
C,0,-1.9696028683,-1.6265434289,-0.0639312369
C,0,-2.7304213903,-0.3728087379,0.0614046717
C,0,-1.9539546825,0.8662241252,0.4076205686
C,0,-2.7463801389,-2.8875888167,-0.2775741352
O,0,-0.5382976373,3.2645892538,-0.606451051
C,0,0.3535195244,2.5652452973,1.4420358865
O,0,-3.9496066067,-0.3546384717,-0.0632065522
C,0,3.712672656,-1.8049839952,-0.8400112178
C,0,2.3967792963,-1.7217268896,-0.067000951
C,0,2.6567313084,-1.8392042209,1.4340086078
H,0,2.1279969946,2.9685747487,-0.5489882993
H,0,1.3792031664,1.9676872756,-1.7930498659
H,0,2.6048604098,0.9382347834,0.8108347029
H,0,3.2953754516,0.8006839561,-0.7927421508
H,0,1.3805654979,-0.5618884142,-1.5440085317
H,0,0.3934006584,-0.2751674662,1.3154084489
H,0,-0.7034351423,0.7599153978,-1.3162561609
H,0,-0.1088475546,-2.5526465475,0.0237455987
H,0,-2.5356684282,1.7436378311,0.1204332449
H,0,-1.8614847758,0.875448898,1.5025323587
H,0,-2.0820033515,-3.7519957291,-0.3239435188
H,0,-3.3195650067,-2.8403602854,-1.2081848557
H,0,-3.4695845931,-3.0443788712,0.528307844
H,0,-0.6138692913,3.0953350909,-1.5530546099
H,0,0.8493791761,1.7842398473,2.0192477402
H,0,-0.6202156999,2.7591931275,1.8965513608
H,0,0.9524900241,3.4762064167,1.5174686739
H,0,3.5580764533,-1.6501041969,-1.9124907475
H,0,4.4340382748,-1.0598126824,-0.4930550873
H,0,4.1717641487,-2.7885536305,-0.7044144178
H,0,1.8108642319,-2.5982367483,-0.3676808163
H,0,1.7313768975,-1.9030011618,2.0123262379
H,0,3.2384735101,-2.7410761333,1.6459756691
H,0,3.2293231978,-0.9859377881,1.8092662728
Recover connectivity data from disk.
ITRead= 0 0 0 0 0 0 0 0 0 0 0 0 0 0 0 0 0 0 0 0
ITRead= 0 0 0 0 0 0 0 0 0 0 0 0 0 0 0 0 0 0 0 0
ITRead= 0
MicOpt= -1 -1 -1 -1 -1 -1 -1 -1 -1 -1 -1 -1 -1 -1 -1 -1 -1 -1 -1 -1
MicOpt= -1 -1 -1 -1 -1 -1 -1 -1 -1 -1 -1 -1 -1 -1 -1 -1 -1 -1 -1 -1
MicOpt= -1
----------------------------
! Current Parameters !
! (Angstroms and Degrees) !
-------------------------- --------------------------
! Name Definition Value !
--------------------------------------------------------------------------------
! R1 R(1,2) 1.5237 !
! R2 R(1,6) 1.5289 !
! R3 R(1,18) 1.095 !
! R4 R(1,19) 1.0985 !
! R5 R(2,3) 1.5305 !
! R6 R(2,20) 1.0953 !
! R7 R(2,21) 1.0928 !
! R8 R(3,4) 1.543 !
! R9 R(3,16) 1.543 !
! R10 R(3,22) 1.1008 !
! R11 R(4,5) 1.5329 !
! R12 R(4,7) 1.497 !
! R13 R(4,23) 1.1015 !
! R14 R(5,6) 1.5388 !
! R15 R(5,10) 1.5222 !
! R16 R(5,24) 1.1014 !
! R17 R(6,12) 1.4388 !
! R18 R(6,13) 1.5203 !
! R19 R(7,8) 1.3428 !
! R20 R(7,25) 1.087 !
! R21 R(8,9) 1.4719 !
! R22 R(8,11) 1.4964 !
! R23 R(9,10) 1.5027 !
! R24 R(9,14) 1.2257 !
! R25 R(10,26) 1.0912 !
! R26 R(10,27) 1.0988 !
! R27 R(11,28) 1.0912 !
! R28 R(11,29) 1.094 !
! R29 R(11,30) 1.0941 !
! R30 R(12,31) 0.9646 !
! R31 R(13,32) 1.0904 !
! R32 R(13,33) 1.092 !
! R33 R(13,34) 1.0928 !
! R34 R(15,16) 1.5284 !
! R35 R(15,35) 1.0946 !
! R36 R(15,36) 1.0936 !
! R37 R(15,37) 1.0939 !
! R38 R(16,17) 1.5279 !
! R39 R(16,38) 1.0963 !
! R40 R(17,39) 1.0931 !
! R41 R(17,40) 1.094 !
! R42 R(17,41) 1.094 !
! A1 A(2,1,6) 112.9987 !
! A2 A(2,1,18) 110.7938 !
! A3 A(2,1,19) 108.9366 !
! A4 A(6,1,18) 108.9367 !
! A5 A(6,1,19) 107.9378 !
! A6 A(18,1,19) 107.0239 !
! A7 A(1,2,3) 112.2091 !
! A8 A(1,2,20) 109.7586 !
! A9 A(1,2,21) 108.7357 !
! A10 A(3,2,20) 109.7212 !
! A11 A(3,2,21) 109.9066 !
! A12 A(20,2,21) 106.3334 !
! A13 A(2,3,4) 109.0862 !
! A14 A(2,3,16) 112.8104 !
! A15 A(2,3,22) 107.294 !
! A16 A(4,3,16) 113.948 !
! A17 A(4,3,22) 106.7472 !
! A18 A(16,3,22) 106.5351 !
! A19 A(3,4,5) 111.5546 !
! A20 A(3,4,7) 113.069 !
! A21 A(3,4,23) 107.5295 !
! A22 A(5,4,7) 109.8194 !
! A23 A(5,4,23) 107.9488 !
! A24 A(7,4,23) 106.6459 !
! A25 A(4,5,6) 113.2537 !
! A26 A(4,5,10) 109.7728 !
! A27 A(4,5,24) 106.5144 !
! A28 A(6,5,10) 113.3486 !
! A29 A(6,5,24) 105.8406 !
! A30 A(10,5,24) 107.6497 !
! A31 A(1,6,5) 108.1301 !
! A32 A(1,6,12) 109.5523 !
! A33 A(1,6,13) 111.5345 !
! A34 A(5,6,12) 109.5155 !
! A35 A(5,6,13) 113.4766 !
! A36 A(12,6,13) 104.5529 !
! A37 A(4,7,8) 125.8532 !
! A38 A(4,7,25) 116.7565 !
! A39 A(8,7,25) 117.389 !
! A40 A(7,8,9) 119.3882 !
! A41 A(7,8,11) 123.0895 !
! A42 A(9,8,11) 117.4939 !
! A43 A(8,9,10) 117.0571 !
! A44 A(8,9,14) 121.2076 !
! A45 A(10,9,14) 121.6815 !
! A46 A(5,10,9) 111.7854 !
! A47 A(5,10,26) 112.1391 !
! A48 A(5,10,27) 109.8391 !
! A49 A(9,10,26) 109.0813 !
! A50 A(9,10,27) 106.2592 !
! A51 A(26,10,27) 107.4788 !
! A52 A(8,11,28) 110.9514 !
! A53 A(8,11,29) 110.9186 !
! A54 A(8,11,30) 111.022 !
! A55 A(28,11,29) 108.4845 !
! A56 A(28,11,30) 108.6767 !
! A57 A(29,11,30) 106.6444 !
! A58 A(6,12,31) 107.9179 !
! A59 A(6,13,32) 111.8662 !
! A60 A(6,13,33) 110.8174 !
! A61 A(6,13,34) 109.5301 !
! A62 A(32,13,33) 108.2033 !
! A63 A(32,13,34) 108.1354 !
! A64 A(33,13,34) 108.1775 !
! A65 A(16,15,35) 111.484 !
! A66 A(16,15,36) 111.7354 !
! A67 A(16,15,37) 110.3419 !
! A68 A(35,15,36) 107.9144 !
! A69 A(35,15,37) 107.9365 !
! A70 A(36,15,37) 107.2479 !
! A71 A(3,16,15) 111.6696 !
! A72 A(3,16,17) 113.9285 !
! A73 A(3,16,38) 107.0153 !
! A74 A(15,16,17) 110.2548 !
! A75 A(15,16,38) 106.1324 !
! A76 A(17,16,38) 107.3909 !
! A77 A(16,17,39) 112.3477 !
! A78 A(16,17,40) 110.1343 !
! A79 A(16,17,41) 111.4739 !
! A80 A(39,17,40) 107.4309 !
! A81 A(39,17,41) 107.8869 !
! A82 A(40,17,41) 107.3509 !
! D1 D(6,1,2,3) 57.5638 !
! D2 D(6,1,2,20) -64.7084 !
! D3 D(6,1,2,21) 179.3552 !
! D4 D(18,1,2,3) -179.8689 !
! D5 D(18,1,2,20) 57.8589 !
! D6 D(18,1,2,21) -58.0774 !
! D7 D(19,1,2,3) -62.3931 !
! D8 D(19,1,2,20) 175.3347 !
! D9 D(19,1,2,21) 59.3983 !
! D10 D(2,1,6,5) -54.8649 !
! D11 D(2,1,6,12) -174.1601 !
! D12 D(2,1,6,13) 70.575 !
! D13 D(18,1,6,5) -178.4622 !
! D14 D(18,1,6,12) 62.2425 !
! D15 D(18,1,6,13) -53.0223 !
! D16 D(19,1,6,5) 65.6631 !
! D17 D(19,1,6,12) -53.6321 !
! D18 D(19,1,6,13) -168.8969 !
! D19 D(1,2,3,4) -55.2232 !
! D20 D(1,2,3,16) 177.0799 !
! D21 D(1,2,3,22) 60.0591 !
! D22 D(20,2,3,4) 67.0702 !
! D23 D(20,2,3,16) -60.6267 !
! D24 D(20,2,3,22) -177.6475 !
! D25 D(21,2,3,4) -176.3436 !
! D26 D(21,2,3,16) 55.9596 !
! D27 D(21,2,3,22) -61.0613 !
! D28 D(2,3,4,5) 54.4474 !
! D29 D(2,3,4,7) 178.8129 !
! D30 D(2,3,4,23) -63.7327 !
! D31 D(16,3,4,5) -178.4995 !
! D32 D(16,3,4,7) -54.134 !
! D33 D(16,3,4,23) 63.3204 !
! D34 D(22,3,4,5) -61.1866 !
! D35 D(22,3,4,7) 63.1789 !
! D36 D(22,3,4,23) -179.3666 !
! D37 D(2,3,16,15) -57.7412 !
! D38 D(2,3,16,17) 67.9813 !
! D39 D(2,3,16,38) -173.4799 !
! D40 D(4,3,16,15) 177.1632 !
! D41 D(4,3,16,17) -57.1142 !
! D42 D(4,3,16,38) 61.4246 !
! D43 D(22,3,16,15) 59.7278 !
! D44 D(22,3,16,17) -174.5496 !
! D45 D(22,3,16,38) -56.0108 !
! D46 D(3,4,5,6) -56.3233 !
! D47 D(3,4,5,10) 175.8796 !
! D48 D(3,4,5,24) 59.6073 !
! D49 D(7,4,5,6) 177.506 !
! D50 D(7,4,5,10) 49.7089 !
! D51 D(7,4,5,24) -66.5634 !
! D52 D(23,4,5,6) 61.6051 !
! D53 D(23,4,5,10) -66.192 !
! D54 D(23,4,5,24) 177.5357 !
! D55 D(3,4,7,8) -145.5369 !
! D56 D(3,4,7,25) 34.8939 !
! D57 D(5,4,7,8) -20.2298 !
! D58 D(5,4,7,25) 160.2009 !
! D59 D(23,4,7,8) 96.4916 !
! D60 D(23,4,7,25) -83.0776 !
! D61 D(4,5,6,1) 54.6088 !
! D62 D(4,5,6,12) 173.9272 !
! D63 D(4,5,6,13) -69.676 !
! D64 D(10,5,6,1) -179.4795 !
! D65 D(10,5,6,12) -60.1611 !
! D66 D(10,5,6,13) 56.2357 !
! D67 D(24,5,6,1) -61.7203 !
! D68 D(24,5,6,12) 57.5981 !
! D69 D(24,5,6,13) 173.9949 !
! D70 D(4,5,10,9) -58.3237 !
! D71 D(4,5,10,26) 178.8096 !
! D72 D(4,5,10,27) 59.3698 !
! D73 D(6,5,10,9) 173.9319 !
! D74 D(6,5,10,26) 51.0652 !
! D75 D(6,5,10,27) -68.3745 !
! D76 D(24,5,10,9) 57.2305 !
! D77 D(24,5,10,26) -65.6362 !
! D78 D(24,5,10,27) 174.9241 !
! D79 D(1,6,12,31) 56.6866 !
! D80 D(5,6,12,31) -61.7519 !
! D81 D(13,6,12,31) 176.3321 !
! D82 D(1,6,13,32) -65.2619 !
! D83 D(1,6,13,33) 173.8944 !
! D84 D(1,6,13,34) 54.6202 !
! D85 D(5,6,13,32) 57.157 !
! D86 D(5,6,13,33) -63.6868 !
! D87 D(5,6,13,34) 177.0391 !
! D88 D(12,6,13,32) 176.4342 !
! D89 D(12,6,13,33) 55.5905 !
! D90 D(12,6,13,34) -63.6837 !
! D91 D(4,7,8,9) -3.6252 !
! D92 D(4,7,8,11) 178.3617 !
! D93 D(25,7,8,9) 175.9416 !
! D94 D(25,7,8,11) -2.0715 !
! D95 D(7,8,9,10) -3.876 !
! D96 D(7,8,9,14) 178.7483 !
! D97 D(11,8,9,10) 174.2475 !
! D98 D(11,8,9,14) -3.1282 !
! D99 D(7,8,11,28) -0.1652 !
! D100 D(7,8,11,29) -120.816 !
! D101 D(7,8,11,30) 120.7986 !
! D102 D(9,8,11,28) -178.2136 !
! D103 D(9,8,11,29) 61.1356 !
! D104 D(9,8,11,30) -57.2498 !
! D105 D(8,9,10,5) 35.1121 !
! D106 D(8,9,10,26) 159.7016 !
! D107 D(8,9,10,27) -84.7077 !
! D108 D(14,9,10,5) -147.5254 !
! D109 D(14,9,10,26) -22.936 !
! D110 D(14,9,10,27) 92.6548 !
! D111 D(35,15,16,3) -48.1381 !
! D112 D(35,15,16,17) -175.8599 !
! D113 D(35,15,16,38) 68.1391 !
! D114 D(36,15,16,3) 72.7107 !
! D115 D(36,15,16,17) -55.0112 !
! D116 D(36,15,16,38) -171.0121 !
! D117 D(37,15,16,3) -168.0648 !
! D118 D(37,15,16,17) 64.2134 !
! D119 D(37,15,16,38) -51.7876 !
! D120 D(3,16,17,39) 60.3176 !
! D121 D(3,16,17,40) -179.9676 !
! D122 D(3,16,17,41) -60.919 !
! D123 D(15,16,17,39) -173.2164 !
! D124 D(15,16,17,40) -53.5016 !
! D125 D(15,16,17,41) 65.5471 !
! D126 D(38,16,17,39) -58.0064 !
! D127 D(38,16,17,40) 61.7083 !
! D128 D(38,16,17,41) -179.243 !
--------------------------------------------------------------------------------
NAtoms= 41 NQM= 41 NQMF= 0 NMMI= 0 NMMIF= 0
NMic= 0 NMicF= 0.
Isotopes and Nuclear Properties:
(Nuclear quadrupole moments (NQMom) in fm**2, nuclear magnetic moments (NMagM)
in nuclear magnetons)
Atom 1 2 3 4 5 6 7 8 9 10
IAtWgt= 12 12 12 12 12 12 12 12 12 12
AtmWgt= 12.0000000 12.0000000 12.0000000 12.0000000 12.0000000 12.0000000 12.0000000 12.0000000 12.0000000 12.0000000
NucSpn= 0 0 0 0 0 0 0 0 0 0
AtZEff= 3.6000000 3.6000000 3.6000000 3.6000000 3.6000000 3.6000000 3.6000000 3.6000000 3.6000000 3.6000000
NQMom= 0.0000000 0.0000000 0.0000000 0.0000000 0.0000000 0.0000000 0.0000000 0.0000000 0.0000000 0.0000000
NMagM= 0.0000000 0.0000000 0.0000000 0.0000000 0.0000000 0.0000000 0.0000000 0.0000000 0.0000000 0.0000000
AtZNuc= 6.0000000 6.0000000 6.0000000 6.0000000 6.0000000 6.0000000 6.0000000 6.0000000 6.0000000 6.0000000
Atom 11 12 13 14 15 16 17 18 19 20
IAtWgt= 12 16 12 16 12 12 12 1 1 1
AtmWgt= 12.0000000 15.9949146 12.0000000 15.9949146 12.0000000 12.0000000 12.0000000 1.0078250 1.0078250 1.0078250
NucSpn= 0 0 0 0 0 0 0 1 1 1
AtZEff= 3.6000000 5.6000000 3.6000000 5.6000000 3.6000000 3.6000000 3.6000000 1.0000000 1.0000000 1.0000000
NQMom= 0.0000000 0.0000000 0.0000000 0.0000000 0.0000000 0.0000000 0.0000000 0.0000000 0.0000000 0.0000000
NMagM= 0.0000000 0.0000000 0.0000000 0.0000000 0.0000000 0.0000000 0.0000000 2.7928460 2.7928460 2.7928460
AtZNuc= 6.0000000 8.0000000 6.0000000 8.0000000 6.0000000 6.0000000 6.0000000 1.0000000 1.0000000 1.0000000
Atom 21 22 23 24 25 26 27 28 29 30
IAtWgt= 1 1 1 1 1 1 1 1 1 1
AtmWgt= 1.0078250 1.0078250 1.0078250 1.0078250 1.0078250 1.0078250 1.0078250 1.0078250 1.0078250 1.0078250
NucSpn= 1 1 1 1 1 1 1 1 1 1
AtZEff= 1.0000000 1.0000000 1.0000000 1.0000000 1.0000000 1.0000000 1.0000000 1.0000000 1.0000000 1.0000000
NQMom= 0.0000000 0.0000000 0.0000000 0.0000000 0.0000000 0.0000000 0.0000000 0.0000000 0.0000000 0.0000000
NMagM= 2.7928460 2.7928460 2.7928460 2.7928460 2.7928460 2.7928460 2.7928460 2.7928460 2.7928460 2.7928460
AtZNuc= 1.0000000 1.0000000 1.0000000 1.0000000 1.0000000 1.0000000 1.0000000 1.0000000 1.0000000 1.0000000
Atom 31 32 33 34 35 36 37 38 39 40
IAtWgt= 1 1 1 1 1 1 1 1 1 1
AtmWgt= 1.0078250 1.0078250 1.0078250 1.0078250 1.0078250 1.0078250 1.0078250 1.0078250 1.0078250 1.0078250
NucSpn= 1 1 1 1 1 1 1 1 1 1
AtZEff= 1.0000000 1.0000000 1.0000000 1.0000000 1.0000000 1.0000000 1.0000000 1.0000000 1.0000000 1.0000000
NQMom= 0.0000000 0.0000000 0.0000000 0.0000000 0.0000000 0.0000000 0.0000000 0.0000000 0.0000000 0.0000000
NMagM= 2.7928460 2.7928460 2.7928460 2.7928460 2.7928460 2.7928460 2.7928460 2.7928460 2.7928460 2.7928460
AtZNuc= 1.0000000 1.0000000 1.0000000 1.0000000 1.0000000 1.0000000 1.0000000 1.0000000 1.0000000 1.0000000
Atom 41
IAtWgt= 1
AtmWgt= 1.0078250
NucSpn= 1
AtZEff= 1.0000000
NQMom= 0.0000000
NMagM= 2.7928460
AtZNuc= 1.0000000
Leave Link 101 at Wed May 27 10:52:44 2020, MaxMem= 3221225472 cpu: 6.4 elap: 0.6
(Enter /public/apps/g16/l202.exe)
Input orientation:
---------------------------------------------------------------------
Center Atomic Atomic Coordinates (Angstroms)
Number Number Type X Y Z
---------------------------------------------------------------------
1 6 0 1.556992 2.048545 -0.712043
2 6 0 2.348173 0.831555 -0.248643
3 6 0 1.580103 -0.474500 -0.464998
4 6 0 0.208239 -0.374816 0.234204
5 6 0 -0.570675 0.861986 -0.227619
6 6 0 0.199790 2.177671 -0.019976
7 6 0 -0.632275 -1.600404 0.054252
8 6 0 -1.969603 -1.626543 -0.063931
9 6 0 -2.730421 -0.372809 0.061405
10 6 0 -1.953955 0.866224 0.407621
11 6 0 -2.746380 -2.887589 -0.277574
12 8 0 -0.538298 3.264589 -0.606451
13 6 0 0.353520 2.565245 1.442036
14 8 0 -3.949607 -0.354638 -0.063207
15 6 0 3.712673 -1.804984 -0.840011
16 6 0 2.396779 -1.721727 -0.067001
17 6 0 2.656731 -1.839204 1.434009
18 1 0 2.127997 2.968575 -0.548988
19 1 0 1.379203 1.967687 -1.793050
20 1 0 2.604860 0.938235 0.810835
21 1 0 3.295375 0.800684 -0.792742
22 1 0 1.380565 -0.561888 -1.544009
23 1 0 0.393401 -0.275167 1.315408
24 1 0 -0.703435 0.759915 -1.316256
25 1 0 -0.108848 -2.552647 0.023746
26 1 0 -2.535668 1.743638 0.120433
27 1 0 -1.861485 0.875449 1.502532
28 1 0 -2.082003 -3.751996 -0.323944
29 1 0 -3.319565 -2.840360 -1.208185
30 1 0 -3.469585 -3.044379 0.528308
31 1 0 -0.613869 3.095335 -1.553055
32 1 0 0.849379 1.784240 2.019248
33 1 0 -0.620216 2.759193 1.896551
34 1 0 0.952490 3.476206 1.517469
35 1 0 3.558076 -1.650104 -1.912491
36 1 0 4.434038 -1.059813 -0.493055
37 1 0 4.171764 -2.788554 -0.704414
38 1 0 1.810864 -2.598237 -0.367681
39 1 0 1.731377 -1.903001 2.012326
40 1 0 3.238474 -2.741076 1.645976
41 1 0 3.229323 -0.985938 1.809266
---------------------------------------------------------------------
Distance matrix (angstroms):
1 2 3 4 5
1 C 0.000000
2 C 1.523737 0.000000
3 C 2.535216 1.530529 0.000000
4 C 2.930392 2.503555 1.542994 0.000000
5 C 2.483859 2.919083 2.543303 1.532863 0.000000
6 C 1.528930 2.545559 3.022800 2.565125 1.538752
7 C 4.323763 3.858658 2.536118 1.496968 2.479236
8 C 5.134510 4.971876 3.753461 2.529566 2.859471
9 C 4.984284 5.228646 4.343738 2.943737 2.504547
10 C 3.870178 4.352033 3.879248 2.499067 1.522173
11 C 6.563017 6.307721 4.957477 3.912253 4.335378
12 O 2.424902 3.792017 4.299816 3.809106 2.432501
13 C 2.520988 3.137311 3.792273 3.181811 2.557924
14 O 6.043088 6.411199 5.545583 4.168518 3.595050
15 C 4.417355 3.027030 2.541393 3.934511 5.082797
16 C 3.916156 2.560196 1.543029 2.587393 3.937913
17 C 4.574884 3.171668 2.574446 3.095008 4.524775
18 H 1.095029 2.169225 3.487407 3.934097 3.438579
19 H 1.098509 2.148230 2.787178 3.311833 2.734076
20 H 2.156380 1.095337 2.161873 2.792919 3.341890
21 H 2.141413 1.092790 2.162330 3.459310 3.907617
22 H 2.745479 2.134460 1.100780 2.138080 2.750934
23 H 3.296080 2.737193 2.148917 1.101461 2.145576
24 H 2.671174 3.233766 2.731843 2.126662 1.101442
25 H 4.948472 4.190938 2.722153 2.210833 3.454879
26 H 4.187583 4.981970 4.711946 3.468403 2.181662
27 H 4.238689 4.559579 4.187847 2.730490 2.158656
28 H 6.858512 6.375035 4.916594 4.118505 4.856153
29 H 6.923031 6.821066 5.491481 4.539251 4.714369
30 H 7.262425 7.033692 5.752415 4.554059 4.922884
31 H 2.552588 3.949669 4.329099 3.988998 2.597401
32 H 2.833818 2.880507 3.436181 2.873841 2.813453
33 H 3.471314 4.138717 4.568926 3.643041 2.848500
34 H 2.715578 3.472933 4.464544 4.126869 3.492780
35 H 4.373262 3.223490 2.718393 4.178046 5.118201
36 H 4.241137 2.826277 2.913473 4.342293 5.367581
37 H 5.498602 4.079019 3.482653 4.734624 6.003708
38 H 4.666436 3.473664 2.138453 2.806114 4.202914
39 H 4.802845 3.601419 2.863675 2.795893 4.238155
40 H 5.597152 4.140762 3.513370 4.095681 5.567947
41 H 4.285065 2.883522 2.855481 3.461393 4.690812
6 7 8 9 10
6 C 0.000000
7 C 3.869327 0.000000
8 C 4.379525 1.342794 0.000000
9 C 3.885577 2.430897 1.471871 0.000000
10 C 2.557606 2.820631 2.537025 1.502654 0.000000
11 C 5.865418 2.497277 1.496416 2.537574 3.897248
12 O 1.438790 4.910551 5.125050 4.299082 2.963879
13 C 1.520305 4.500041 5.023537 4.477610 3.046494
14 O 4.861270 3.545478 2.353329 1.225672 2.386380
15 C 5.373485 4.440735 5.737804 6.661617 6.387692
16 C 4.475967 3.033907 4.367421 5.303231 5.084451
17 C 4.928075 3.574677 4.867445 5.749415 5.443458
18 H 2.150201 5.372017 6.175817 5.928040 4.690129
19 H 2.139836 4.493311 5.207960 5.079954 4.143201
20 H 2.830338 4.182840 5.316862 5.544882 4.577178
21 H 3.475041 4.680711 5.843167 6.198135 5.385224
22 H 3.349939 2.772089 3.814151 4.417388 4.119149
23 H 2.799492 2.097326 3.051652 3.367540 2.763500
24 H 2.122778 2.730286 2.977698 2.699942 2.132335
25 H 4.740577 1.087048 2.080328 3.409657 3.903903
26 H 2.773235 3.848363 3.422359 2.126208 1.091202
27 H 2.874485 3.120628 2.953890 2.095244 1.098848
28 H 6.360811 2.621849 2.144245 3.462347 4.677557
29 H 6.243263 3.217571 2.145942 2.836857 4.267843
30 H 6.405835 3.218714 2.147312 2.810987 4.195773
31 H 1.963282 4.963238 5.133385 4.371990 3.257148
32 H 2.176049 4.184772 4.890781 4.615298 3.361365
33 H 2.164175 4.732895 4.989892 4.198829 2.753018
34 H 2.148602 5.515837 6.089130 5.522579 4.060935
35 H 5.432455 4.629211 5.828633 6.713639 6.488244
36 H 5.351071 5.124384 6.442977 7.218648 6.732554
37 H 6.395969 5.006602 6.283063 7.352718 7.219311
38 H 5.052302 2.672570 3.915148 5.075423 5.174693
39 H 4.809147 3.084230 4.252590 5.104432 4.881123
40 H 6.016899 4.337904 5.593749 6.614171 6.442627
41 H 4.746854 4.285975 5.563100 6.240954 5.679919
11 12 13 14 15
11 C 0.000000
12 O 6.544699 0.000000
13 C 6.503832 2.341093 0.000000
14 O 2.812391 5.003094 5.413721 0.000000
15 C 6.573259 6.620111 5.965782 7.836929 0.000000
16 C 5.277847 5.811113 4.982994 6.491961 1.528415
17 C 5.763874 6.357703 4.970314 6.934644 2.507459
18 H 7.624164 2.683292 2.697336 6.943846 5.038130
19 H 6.549108 2.601304 3.445995 6.064797 4.537225
20 H 6.667633 4.159335 2.848528 6.737693 3.387889
21 H 7.097293 4.560985 4.094194 7.372704 2.639295
22 H 4.903511 4.382121 4.444125 5.535925 2.734890
23 H 4.384126 4.134185 2.843514 4.557259 4.243081
24 H 4.307757 2.608541 3.461870 3.653764 5.129086
25 H 2.675735 5.867010 5.330867 4.426085 3.988620
26 H 4.653071 2.613646 3.281628 2.536870 7.249616
27 H 4.255851 3.450598 2.786632 2.885291 6.613884
28 H 1.091213 7.189945 6.996999 3.885610 6.134774
29 H 1.093987 6.735573 7.052361 2.808334 7.117578
30 H 1.094099 7.048631 6.849738 2.795535 7.415741
31 H 6.478413 0.964581 3.191771 5.024849 6.575753
32 H 6.326994 3.318339 1.090422 5.651697 5.408913
33 H 6.413544 2.554830 1.091953 4.962000 6.862537
34 H 7.576392 2.603510 1.092843 6.419070 6.408377
35 H 6.629517 6.529949 6.268270 7.839859 1.094578
36 H 7.412530 6.590708 5.791050 8.424224 1.093630
37 H 6.932007 7.670386 6.917326 8.502456 1.093874
38 H 4.567310 6.320467 5.662197 6.189464 2.114053
39 H 5.124779 6.222010 4.710515 6.243303 3.474330
40 H 6.288083 7.443483 6.043310 7.764334 2.698382
41 H 6.609101 6.172328 4.584322 7.445920 2.814806
16 17 18 19 20
16 C 0.000000
17 C 1.527876 0.000000
18 H 4.722657 5.227483 0.000000
19 H 4.198391 5.151544 1.763564 0.000000
20 H 2.808788 2.846964 2.489738 3.056505 0.000000
21 H 2.774298 3.512164 2.474255 2.456467 1.751339
22 H 2.135291 3.482631 3.743379 2.541806 3.048697
23 H 2.831451 2.753714 4.123914 3.957868 2.572449
24 H 4.162994 5.060642 3.672041 2.454267 3.937148
25 H 2.641369 3.185321 5.984595 5.093963 4.491099
26 H 6.030997 6.443854 4.868097 4.363237 5.248844
27 H 5.228917 5.271462 4.950341 4.749306 4.520025
28 H 4.924176 5.404144 7.933525 6.844925 6.727011
29 H 5.935506 6.610569 7.990882 6.748171 7.311158
30 H 6.043015 6.309080 8.285475 7.349847 7.269107
31 H 5.871665 6.630916 2.922678 2.302504 4.538863
32 H 4.363334 4.091256 3.103764 3.853308 2.292968
33 H 5.747734 5.665473 3.684722 4.270517 3.859506
34 H 5.622724 5.582562 2.430998 3.662956 3.109817
35 H 2.181645 3.470913 5.023590 4.224946 3.876161
36 H 2.184051 2.734931 4.642075 4.493079 3.006362
37 H 2.166792 2.787372 6.111110 5.621864 4.317420
38 H 1.096346 2.130189 5.578784 4.802673 3.811294
39 H 2.190713 1.093070 5.518142 5.439406 3.206116
40 H 2.163749 1.093950 6.217004 6.120150 3.825736
41 H 2.180572 1.093958 4.734179 5.012337 2.255939
21 22 23 24 25
21 H 0.000000
22 H 2.467286 0.000000
23 H 3.744758 3.038580 0.000000
24 H 4.033140 2.478325 3.033167 0.000000
25 H 4.847702 2.939272 2.666000 3.622459 0.000000
26 H 5.976966 4.839701 3.752731 2.527620 4.935268
27 H 5.645094 4.675280 2.538394 3.049589 4.124365
28 H 7.061364 4.863612 4.572027 4.821045 2.335095
29 H 7.562224 5.234065 5.170576 4.451719 3.450962
30 H 7.892678 5.829340 4.817750 5.052391 3.433793
31 H 4.596270 4.165710 4.539048 2.349102 5.885664
32 H 3.854551 4.299218 2.223615 3.819170 4.869169
33 H 5.138084 5.183644 3.251536 3.784993 5.655488
34 H 4.240826 5.085479 3.798186 4.260319 6.301168
35 H 2.707252 2.462021 4.724929 4.931954 4.243810
36 H 2.201775 3.267434 4.495883 5.512051 4.809724
37 H 3.695739 3.667935 4.967175 6.060821 4.348506
38 H 3.733244 2.390736 3.199788 4.301009 1.959741
39 H 4.198144 3.816958 2.219396 4.909063 2.786201
40 H 4.300540 4.286803 3.779473 6.047347 3.724472
41 H 3.157028 3.852554 2.965054 5.318222 4.097078
26 27 28 29 30
26 H 0.000000
27 H 1.765920 0.000000
28 H 5.532203 4.979748 0.000000
29 H 4.836606 4.825062 1.773280 0.000000
30 H 4.895270 4.347430 1.775510 1.754861 0.000000
31 H 2.884607 3.977568 7.109998 6.532397 7.084015
32 H 3.881455 2.905457 6.688307 7.013084 6.647699
33 H 2.802661 2.290086 7.032994 6.948444 6.608513
34 H 4.137723 3.831790 8.052692 8.098065 7.940480
35 H 7.265259 6.885670 6.225105 7.015320 7.568984
36 H 7.537408 6.881949 7.052322 7.987498 8.212730
37 H 8.137001 7.395649 6.338974 7.508427 7.744370
38 H 6.162992 5.389836 4.060479 5.204457 5.374475
39 H 5.923252 4.570375 4.839298 6.063196 5.527663
40 H 7.468645 6.253751 5.762813 7.152899 6.807291
41 H 6.598323 5.429104 6.357032 7.445256 7.124142
31 32 33 34 35
31 H 0.000000
32 H 4.076936 0.000000
33 H 3.465951 1.767851 0.000000
34 H 3.467947 1.767814 1.769524 0.000000
35 H 6.328785 5.881354 7.169995 6.695727 0.000000
36 H 6.623460 5.220161 6.770562 6.061258 1.769336
37 H 7.631686 6.274314 7.778534 7.385642 1.769782
38 H 6.300889 5.082124 6.303884 6.417901 2.517567
39 H 6.572327 3.791268 5.222973 5.457786 4.336471
40 H 7.690126 5.130847 6.723484 6.625469 3.735646
41 H 6.536981 3.658157 5.371459 5.017952 3.794822
36 37 38 39 40
36 H 0.000000
37 H 1.761251 0.000000
38 H 3.043601 2.392375 0.000000
39 H 3.780513 3.757708 2.480747 0.000000
40 H 2.971780 2.529352 2.472506 1.762930 0.000000
41 H 2.599515 3.233606 3.057880 1.768073 1.762742
41
41 H 0.000000
Stoichiometry C15H24O2
Framework group C1[X(C15H24O2)]
Deg. of freedom 117
Full point group C1 NOp 1
RotChk: IX=0 Diff= 1.98D-15
Largest Abelian subgroup C1 NOp 1
Largest concise Abelian subgroup C1 NOp 1
Standard orientation:
---------------------------------------------------------------------
Center Atomic Atomic Coordinates (Angstroms)
Number Number Type X Y Z
---------------------------------------------------------------------
1 6 0 1.441429 2.092420 -0.723012
2 6 0 2.252975 0.892804 -0.249635
3 6 0 1.511695 -0.428711 -0.465557
4 6 0 0.133684 -0.352830 0.224485
5 6 0 -0.665991 0.866837 -0.247319
6 6 0 0.077554 2.197992 -0.040131
7 6 0 -0.681815 -1.595152 0.044175
8 6 0 -2.017598 -1.647628 -0.082413
9 6 0 -2.803292 -0.408363 0.032973
10 6 0 -2.053159 0.846818 0.379079
11 6 0 -2.768471 -2.924300 -0.295862
12 8 0 -0.677603 3.268104 -0.635713
13 6 0 0.214341 2.594235 1.421240
14 8 0 -4.021772 -0.414277 -0.099471
15 6 0 3.671948 -1.719154 -0.821567
16 6 0 2.349737 -1.658323 -0.057295
17 6 0 2.602232 -1.764824 1.445804
18 1 0 1.993488 3.023962 -0.560071
19 1 0 1.272206 2.003872 -1.804791
20 1 0 2.500721 1.008610 0.811013
21 1 0 3.204084 0.878118 -0.787562
22 1 0 1.320841 -0.524201 -1.545452
23 1 0 0.309914 -0.245352 1.306432
24 1 0 -0.789735 0.757922 -1.336354
25 1 0 -0.139899 -2.537202 0.020878
26 1 0 -2.649855 1.711672 0.084625
27 1 0 -1.967942 0.862151 1.474511
28 1 0 -2.087231 -3.775866 -0.334482
29 1 0 -3.336452 -2.891843 -1.230288
30 1 0 -3.493689 -3.091871 0.506030
31 1 0 -0.743788 3.093685 -1.582081
32 1 0 0.721469 1.825254 2.004772
33 1 0 -0.765868 2.771099 1.868754
34 1 0 0.795099 3.516905 1.496777
35 1 0 3.521302 -1.571528 -1.895630
36 1 0 4.376529 -0.958802 -0.473061
37 1 0 4.149075 -2.693114 -0.679048
38 1 0 1.782818 -2.547185 -0.358129
39 1 0 1.674576 -1.844230 2.018474
40 1 0 3.199914 -2.654428 1.665140
41 1 0 3.155800 -0.899165 1.821224
---------------------------------------------------------------------
Rotational constants (GHZ): 0.5557160 0.4055370 0.2637782
Leave Link 202 at Wed May 27 10:52:44 2020, MaxMem= 3221225472 cpu: 0.2 elap: 0.0
(Enter /public/apps/g16/l301.exe)
Standard basis: 6-311+G(2d,p) (5D, 7F)
Ernie: Thresh= 0.10000D-02 Tol= 0.10000D-05 Strict=F.
There are 637 symmetry adapted cartesian basis functions of A symmetry.
There are 603 symmetry adapted basis functions of A symmetry.
603 basis functions, 906 primitive gaussians, 637 cartesian basis functions
65 alpha electrons 65 beta electrons
nuclear repulsion energy 1330.8718130223 Hartrees.
IExCor= 3731 DFT=T Ex+Corr=APFD ExCW=0 ScaHFX= 0.229450
ScaDFX= 1.000000 1.000000 1.000000 1.000000 ScalE2= 1.000000 1.000000
IRadAn= 5 IRanWt= -1 IRanGd= 0 ICorTp=0 IEmpDi=211
NAtoms= 41 NActive= 41 NUniq= 41 SFac= 1.00D+00 NAtFMM= 60 NAOKFM=F Big=F
Integral buffers will be 131072 words long.
Regular integral format.
Two-electron integral symmetry is turned on.
R6APFD: NTU= -4 IXU= 1 FactS= 1.050
R6Disp: Petersson-Frisch Dispersion energy= -0.0438687287 Hartrees.
Nuclear repulsion after empirical dispersion term = 1330.8279442936 Hartrees.
------------------------------------------------------------------------------
Polarizable Continuum Model (PCM)
=================================
Model : PCM.
Atomic radii : Bondi.
Polarization charges : Total charges.
Charge compensation : None.
Solution method : Matrix inversion.
Cavity type : Scaled VdW (van der Waals Surface) (Alpha=1.100).
Cavity algorithm : GePol (No added spheres)
Default sphere list used, NSphG= 41.
Lebedev-Laikov grids with approx. 5.0 points / Ang**2.
Smoothing algorithm: York/Karplus (Gamma=1.0000).
Polarization charges: spherical gaussians, with
point-specific exponents (IZeta= 3).
Self-potential: point-specific (ISelfS= 7).
Self-field : sphere-specific E.n sum rule (ISelfD= 2).
Solvent : Methanol, Eps= 32.613000 Eps(inf)= 1.765709
------------------------------------------------------------------------------
GePol: Number of generator spheres = 41
GePol: Total number of spheres = 41
GePol: Number of exposed spheres = 41 (100.00%)
GePol: Number of points = 2412
GePol: Average weight of points = 0.12
GePol: Minimum weight of points = 0.17D-10
GePol: Maximum weight of points = 0.21770
GePol: Number of points with low weight = 212
GePol: Fraction of low-weight points (<1% of avg) = 8.79%
GePol: Cavity surface area = 298.055 Ang**2
GePol: Cavity volume = 284.050 Ang**3
Leave Link 301 at Wed May 27 10:52:45 2020, MaxMem= 3221225472 cpu: 1.3 elap: 0.1
(Enter /public/apps/g16/l302.exe)
NPDir=0 NMtPBC= 1 NCelOv= 1 NCel= 1 NClECP= 1 NCelD= 1
NCelK= 1 NCelE2= 1 NClLst= 1 CellRange= 0.0.
One-electron integrals computed using PRISM.
One-electron integral symmetry used in STVInt
NBasis= 603 RedAO= T EigKep= 1.09D-06 NBF= 603
NBsUse= 602 1.00D-06 EigRej= 5.72D-07 NBFU= 602
Precomputing XC quadrature grid using
IXCGrd= 4 IRadAn= 5 IRanWt= -1 IRanGd= 0 AccXCQ= 0.00D+00.
Generated NRdTot= 0 NPtTot= 0 NUsed= 0 NTot= 32
NSgBfM= 637 637 637 637 637 MxSgAt= 41 MxSgA2= 41.
Leave Link 302 at Wed May 27 10:52:45 2020, MaxMem= 3221225472 cpu: 9.4 elap: 0.8
(Enter /public/apps/g16/l303.exe)
DipDrv: MaxL=1.
Leave Link 303 at Wed May 27 10:52:46 2020, MaxMem= 3221225472 cpu: 0.9 elap: 0.1
(Enter /public/apps/g16/l308.exe)
Leave Link 308 at Wed May 27 10:52:46 2020, MaxMem= 3221225472 cpu: 1.4 elap: 0.2
(Enter /public/apps/g16/l401.exe)
Initial guess from the checkpoint file: "CONF_2_ecd.chk"
B after Tr= -0.000000 -0.000000 -0.000000
Rot= 1.000000 0.000000 0.000000 -0.000000 Ang= 0.00 deg.
Guess basis will be translated and rotated to current coordinates.
JPrj=2 DoOrth=T DoCkMO=T.
Leave Link 401 at Wed May 27 10:52:46 2020, MaxMem= 3221225472 cpu: 6.9 elap: 0.6
(Enter /public/apps/g16/l502.exe)
Integral symmetry usage will be decided dynamically.
Closed shell SCF:
Using DIIS extrapolation, IDIIS= 1040.
NGot= 3221225472 LenX= 3220399270 LenY= 3219992864
Requested convergence on RMS density matrix=1.00D-08 within 128 cycles.
Requested convergence on MAX density matrix=1.00D-06.
Requested convergence on energy=1.00D-06.
No special actions if energy rises.
Fock matrices will be formed incrementally for 20 cycles.
Cycle 1 Pass 1 IDiag 1:
FoFJK: IHMeth= 1 ICntrl= 0 DoSepK=F KAlg= 0 I1Cent= 0 FoldK=F
IRaf= 880000000 NMat= 1 IRICut= 1 DoRegI=T DoRafI=F ISym2E= 0 IDoP0=0 IntGTp=1.
FoFCou: FMM=F IPFlag= 0 FMFlag= 100000 FMFlg1= 0
NFxFlg= 0 DoJE=F BraDBF=F KetDBF=F FulRan=T
wScrn= 0.000000 ICntrl= 0 IOpCl= 0 I1Cent= 0 NGrid= 0
NMat0= 1 NMatS0= 1 NMatT0= 0 NMatD0= 1 NMtDS0= 0 NMtDT0= 0
Symmetry not used in FoFCou.
Inv3: Mode=1 IEnd= 17453232.
Iteration 1 A*A^-1 deviation from unit magnitude is 2.89D-15 for 191.
Iteration 1 A*A^-1 deviation from orthogonality is 2.33D-15 for 2250 1830.
Iteration 1 A^-1*A deviation from unit magnitude is 3.11D-15 for 191.
Iteration 1 A^-1*A deviation from orthogonality is 4.46D-13 for 1933 1883.
E= -736.159027092453
DIIS: error= 1.69D-08 at cycle 1 NSaved= 1.
NSaved= 1 IEnMin= 1 EnMin= -736.159027092453 IErMin= 1 ErrMin= 1.69D-08
ErrMax= 1.69D-08 0.00D+00 EMaxC= 1.00D-01 BMatC= 1.45D-13 BMatP= 1.45D-13
IDIUse=1 WtCom= 1.00D+00 WtEn= 0.00D+00
Coeff-Com: 0.100D+01
Coeff: 0.100D+01
Gap= 0.201 Goal= None Shift= 0.000
RMSDP=4.30D-09 MaxDP=1.20D-06 OVMax= 1.93D-07
Cycle 2 Pass 1 IDiag 1:
RMSU= 3.68D-09 CP: 1.00D+00
E= -736.159027092463 Delta-E= -0.000000000010 Rises=F Damp=F
DIIS: error= 3.47D-08 at cycle 2 NSaved= 2.
NSaved= 2 IEnMin= 2 EnMin= -736.159027092463 IErMin= 1 ErrMin= 1.69D-08
ErrMax= 3.47D-08 0.00D+00 EMaxC= 1.00D-01 BMatC= 5.96D-13 BMatP= 1.45D-13
IDIUse=1 WtCom= 1.00D+00 WtEn= 0.00D+00
Coeff-Com: 0.670D+00 0.330D+00
Coeff: 0.670D+00 0.330D+00
Gap= 0.201 Goal= None Shift= 0.000
RMSDP=3.06D-09 MaxDP=8.59D-07 DE=-9.78D-12 OVMax= 1.30D-07
Error on total polarization charges = 0.04837
SCF Done: E(RAPFD) = -736.159027092 A.U. after 2 cycles
NFock= 2 Conv=0.31D-08 -V/T= 2.0046
KE= 7.328095402999D+02 PE=-4.373918000169D+03 EE= 1.574121488483D+03
Leave Link 502 at Wed May 27 10:53:29 2020, MaxMem= 3221225472 cpu: 508.8 elap: 42.9
(Enter /public/apps/g16/l801.exe)
DoSCS=F DFT=T ScalE2(SS,OS)= 1.000000 1.000000
ExpMin= 4.38D-02 ExpMax= 8.59D+03 ExpMxC= 1.30D+03 IAcc=3 IRadAn= 5 AccDes= 0.00D+00
HarFok: IExCor= 205 AccDes= 0.00D+00 IRadAn= 5 IDoV=-2 UseB2=F ITyADJ=14
ICtDFT= 12500011 ScaDFX= 1.000000 1.000000 1.000000 1.000000
Largest valence mixing into a core orbital is 5.60D-05
Largest core mixing into a valence orbital is 1.51D-05
Range of M.O.s used for correlation: 18 602
NBasis= 603 NAE= 65 NBE= 65 NFC= 17 NFV= 0
NROrb= 585 NOA= 48 NOB= 48 NVA= 537 NVB= 537
**** Warning!!: The largest alpha MO coefficient is 0.17716898D+03
Leave Link 801 at Wed May 27 10:53:29 2020, MaxMem= 3221225472 cpu: 2.0 elap: 0.2
(Enter /public/apps/g16/l914.exe)
RHF ground state
Two-electron integrals replicated using symmetry.
MDV= 3221225472 DFT=T DoStab=F Mixed=T DoRPA=T DoScal=F NonHer=T
NEqPCM: Using non-equilibrium solvation (IEInf=1, Eps= 32.6130, EpsInf= 1.7657)
Inv3: Mode=1 IEnd= 17453232.
Iteration 1 A*A^-1 deviation from unit magnitude is 3.77D-15 for 384.
Iteration 1 A*A^-1 deviation from orthogonality is 2.11D-15 for 1411 429.
Iteration 1 A^-1*A deviation from unit magnitude is 3.33D-15 for 384.
Iteration 1 A^-1*A deviation from orthogonality is 2.00D-15 for 2192 1509.
Making orbital integer symmetry assigments:
Orbital symmetries:
Occupied (A) (A) (A) (A) (A) (A) (A) (A) (A) (A) (A) (A)
(A) (A) (A) (A) (A) (A) (A) (A) (A) (A) (A) (A)
(A) (A) (A) (A) (A) (A) (A) (A) (A) (A) (A) (A)
(A) (A) (A) (A) (A) (A) (A) (A) (A) (A) (A) (A)
(A) (A) (A) (A) (A) (A) (A) (A) (A) (A) (A) (A)
(A) (A) (A) (A) (A)
Virtual (A) (A) (A) (A) (A) (A) (A) (A) (A) (A) (A) (A)
(A) (A) (A) (A) (A) (A) (A) (A) (A) (A) (A) (A)
(A) (A) (A) (A) (A) (A) (A) (A) (A) (A) (A) (A)
(A) (A) (A) (A) (A) (A) (A) (A) (A) (A) (A) (A)
(A) (A) (A) (A) (A) (A) (A) (A) (A) (A) (A) (A)
(A) (A) (A) (A) (A) (A) (A) (A) (A) (A) (A) (A)
(A) (A) (A) (A) (A) (A) (A) (A) (A) (A) (A) (A)
(A) (A) (A) (A) (A) (A) (A) (A) (A) (A) (A) (A)
(A) (A) (A) (A) (A) (A) (A) (A) (A) (A) (A) (A)
(A) (A) (A) (A) (A) (A) (A) (A) (A) (A) (A) (A)
(A) (A) (A) (A) (A) (A) (A) (A) (A) (A) (A) (A)
(A) (A) (A) (A) (A) (A) (A) (A) (A) (A) (A) (A)
(A) (A) (A) (A) (A) (A) (A) (A) (A) (A) (A) (A)
(A) (A) (A) (A) (A) (A) (A) (A) (A) (A) (A) (A)
(A) (A) (A) (A) (A) (A) (A) (A) (A) (A) (A) (A)
(A) (A) (A) (A) (A) (A) (A) (A) (A) (A) (A) (A)
(A) (A) (A) (A) (A) (A) (A) (A) (A) (A) (A) (A)
(A) (A) (A) (A) (A) (A) (A) (A) (A) (A) (A) (A)
(A) (A) (A) (A) (A) (A) (A) (A) (A) (A) (A) (A)
(A) (A) (A) (A) (A) (A) (A) (A) (A) (A) (A) (A)
(A) (A) (A) (A) (A) (A) (A) (A) (A) (A) (A) (A)
(A) (A) (A) (A) (A) (A) (A) (A) (A) (A) (A) (A)
(A) (A) (A) (A) (A) (A) (A) (A) (A) (A) (A) (A)
(A) (A) (A) (A) (A) (A) (A) (A) (A) (A) (A) (A)
(A) (A) (A) (A) (A) (A) (A) (A) (A) (A) (A) (A)
(A) (A) (A) (A) (A) (A) (A) (A) (A) (A) (A) (A)
(A) (A) (A) (A) (A) (A) (A) (A) (A) (A) (A) (A)
(A) (A) (A) (A) (A) (A) (A) (A) (A) (A) (A) (A)
(A) (A) (A) (A) (A) (A) (A) (A) (A) (A) (A) (A)
(A) (A) (A) (A) (A) (A) (A) (A) (A) (A) (A) (A)
(A) (A) (A) (A) (A) (A) (A) (A) (A) (A) (A) (A)
(A) (A) (A) (A) (A) (A) (A) (A) (A) (A) (A) (A)
(A) (A) (A) (A) (A) (A) (A) (A) (A) (A) (A) (A)
(A) (A) (A) (A) (A) (A) (A) (A) (A) (A) (A) (A)
(A) (A) (A) (A) (A) (A) (A) (A) (A) (A) (A) (A)
(A) (A) (A) (A) (A) (A) (A) (A) (A) (A) (A) (A)
(A) (A) (A) (A) (A) (A) (A) (A) (A) (A) (A) (A)
(A) (A) (A) (A) (A) (A) (A) (A) (A) (A) (A) (A)
(A) (A) (A) (A) (A) (A) (A) (A) (A) (A) (A) (A)
(A) (A) (A) (A) (A) (A) (A) (A) (A) (A) (A) (A)
(A) (A) (A) (A) (A) (A) (A) (A) (A) (A) (A) (A)
(A) (A) (A) (A) (A) (A) (A) (A) (A) (A) (A) (A)
(A) (A) (A) (A) (A) (A) (A) (A) (A) (A) (A) (A)
(A) (A) (A) (A) (A) (A) (A) (A) (A) (A) (A) (A)
(A) (A) (A) (A) (A) (A) (A) (A) (A)
400 initial guesses have been made.
Convergence on wavefunction: 0.001000000000000
Davidson Disk Diagonalization: ConvIn= 1.00D-03 SkipCon=T Conv= 1.00D-03.
Max sub-space: 6000 roots to seek: 400 dimension of matrix: 51552
Iteration 1 Dimension 400 NMult 0 NNew 400
CISAX will form 204 AO SS matrices at one time.
NMat= 204 NSing= 204 JSym2X= 0.
FoFJK: IHMeth= 1 ICntrl= 0 DoSepK=F KAlg= 0 I1Cent= 0 FoldK=F
IRaf= 880000000 NMat= 408 IRICut= 510 DoRegI=T DoRafI=T ISym2E= 0 IDoP0=3 IntGTp=3.
NMat= 196 NSing= 196 JSym2X= 0.
New state 2 was old state 3
New state 3 was old state 4
New state 4 was old state 2
New state 9 was old state 10
New state 10 was old state 11
New state 11 was old state 12
New state 12 was old state 14
New state 14 was old state 9
New state 15 was old state 22
New state 16 was old state 15
New state 17 was old state 18
New state 18 was old state 16
New state 19 was old state 17
New state 20 was old state 21
New state 21 was old state 20
New state 22 was old state 19
New state 23 was old state 27
New state 24 was old state 23
New state 25 was old state 30
New state 26 was old state 47
New state 27 was old state 24
New state 28 was old state 25
New state 29 was old state 31
New state 30 was old state 34
New state 31 was old state 29
New state 32 was old state 28
New state 34 was old state 36
New state 36 was old state 50
New state 38 was old state 39
New state 39 was old state 38
New state 40 was old state 43
New state 41 was old state 44
New state 42 was old state 41
New state 43 was old state 40
New state 44 was old state 42
New state 45 was old state 49
New state 46 was old state 48
New state 47 was old state 53
New state 48 was old state 52
New state 49 was old state 46
New state 50 was old state 45
New state 51 was old state 54
New state 52 was old state 51
New state 53 was old state 61
New state 54 was old state 57
New state 55 was old state 86
New state 57 was old state 59
New state 59 was old state 60
New state 60 was old state 55
New state 61 was old state 71
New state 62 was old state 67
New state 63 was old state 62
New state 64 was old state 63
New state 65 was old state 64
New state 66 was old state 68
New state 67 was old state 72
New state 68 was old state 69
New state 69 was old state 65
New state 70 was old state 75
New state 71 was old state 66
New state 72 was old state 74
New state 73 was old state 70
New state 74 was old state 80
New state 75 was old state 77
New state 76 was old state 73
New state 77 was old state 82
New state 79 was old state 76
New state 80 was old state 83
New state 81 was old state 88
New state 82 was old state 79
New state 83 was old state 91
New state 84 was old state 115
New state 85 was old state 81
New state 86 was old state 87
New state 87 was old state 89
New state 88 was old state 102
New state 89 was old state 90
New state 90 was old state 84
New state 91 was old state 85
New state 93 was old state 94
New state 94 was old state 93
New state 95 was old state 97
New state 96 was old state 103
New state 97 was old state 101
New state 98 was old state 96
New state 99 was old state 104
Excitation Energies [eV] at current iteration:
Root 1 : 3.914202054691673
Root 2 : 5.177308571615631
Root 3 : 5.624012715668528
Root 4 : 5.682000179580292
Root 5 : 6.081856652909891
Root 6 : 6.384865511234838
Root 7 : 6.460054790436947
Root 8 : 6.578689856735839
Root 9 : 6.790405321482271
Root 10 : 6.874020910989825
Root 11 : 6.884833497000249
Root 12 : 6.953412565507421
Root 13 : 6.986849706826217
Root 14 : 6.993069800583398
Root 15 : 7.112318429987502
Root 16 : 7.175683801712951
Root 17 : 7.192302405719040
Root 18 : 7.232658464326940
Root 19 : 7.241122783909525
Root 20 : 7.318162235709169
Root 21 : 7.378546962944603
Root 22 : 7.449335668111606
Root 23 : 7.478804952066554
Root 24 : 7.539758628108248
Root 25 : 7.604187273288215
Root 26 : 7.629914267755395
Root 27 : 7.653293898543976
Root 28 : 7.656062104119433
Root 29 : 7.679546188592166
Root 30 : 7.717920102079478
Root 31 : 7.757732566482888
Root 32 : 7.780187512124031
Root 33 : 7.797807778705578
Root 34 : 7.830954358341688
Root 35 : 7.888808024129830
Root 36 : 7.900004678567957
Root 37 : 7.911779884096098
Root 38 : 7.959694357176055
Root 39 : 7.996360739761269
Root 40 : 8.020568373019216
Root 41 : 8.025624527014756
Root 42 : 8.056676398831137
Root 43 : 8.068473813655324
Root 44 : 8.105916239858733
Root 45 : 8.116041896606079
Root 46 : 8.126275144160862
Root 47 : 8.154091501637955
Root 48 : 8.172150863258580
Root 49 : 8.220277210546898
Root 50 : 8.259243580382364
Root 51 : 8.260745308454995
Root 52 : 8.281373007503566
Root 53 : 8.306049472208612
Root 54 : 8.310505669943529
Root 55 : 8.325045840048331
Root 56 : 8.355945036654971
Root 57 : 8.368936149045291
Root 58 : 8.379178708037179
Root 59 : 8.406673973484734
Root 60 : 8.411850268011429
Root 61 : 8.437720745897993
Root 62 : 8.447906138089300
Root 63 : 8.472855984789286
Root 64 : 8.482177978972759
Root 65 : 8.483892822941408
Root 66 : 8.497379252116462
Root 67 : 8.542292093878698
Root 68 : 8.558488003104744
Root 69 : 8.563865462555414
Root 70 : 8.575317441218736
Root 71 : 8.596241553042081
Root 72 : 8.604847062077930
Root 73 : 8.637623704857235
Root 74 : 8.651630991305884
Root 75 : 8.662953026403013
Root 76 : 8.679272738066132
Root 77 : 8.699866307451172
Root 78 : 8.713793159539691
Root 79 : 8.730114326753068
Root 80 : 8.746982287366555
Root 81 : 8.753796089584343
Root 82 : 8.782441080916872
Root 83 : 8.801822652202848
Root 84 : 8.809869257754276
Root 85 : 8.821533693226739
Root 86 : 8.840543990011637
Root 87 : 8.848595406700763
Root 88 : 8.854481213505814
Root 89 : 8.865627342896756
Root 90 : 8.878962563175701
Root 91 : 8.895560928456522
Root 92 : 8.912912012725485
Root 93 : 8.920792746847326
Root 94 : 8.959099584332211
Root 95 : 8.968282897177954
Root 96 : 8.989057104772421
Root 97 : 8.997647766901006
Root 98 : 9.019092472527653
Root 99 : 9.026134318777233
Root 100 : 9.034166886274873
Root 101 : 9.040866185839034
Root 102 : 9.052869457620190
Root 103 : 9.070753774856955
Root 104 : 9.072386812570290
Root 105 : 9.080432908010462
Root 106 : 9.088937463697409
Root 107 : 9.108377259802110
Root 108 : 9.116332638366423
Root 109 : 9.128353806790349
Root 110 : 9.143167374106813
Root 111 : 9.157120839081879
Root 112 : 9.169046984333436
Root 113 : 9.183453144860424
Root 114 : 9.196376237013165
Root 115 : 9.208301721827613
Root 116 : 9.214954152814801
Root 117 : 9.234872030927246
Root 118 : 9.243106414136326
Root 119 : 9.247044844025114
Root 120 : 9.258070235938339
Root 121 : 9.276930269609409
Root 122 : 9.284662342380598
Root 123 : 9.301033045458087
Root 124 : 9.308776317097971
Root 125 : 9.322837523085424
Root 126 : 9.328585977669455
Root 127 : 9.333106022177574
Root 128 : 9.339845862586140
Root 129 : 9.346542899933668
Root 130 : 9.360014186822566
Root 131 : 9.378136305430113
Root 132 : 9.391110630743951
Root 133 : 9.392518987018853
Root 134 : 9.408795668860215
Root 135 : 9.417003181014534
Root 136 : 9.443332752592708
Root 137 : 9.454540033278658
Root 138 : 9.460910531516308
Root 139 : 9.473803356276710
Root 140 : 9.478247208634452
Root 141 : 9.485594719611271
Root 142 : 9.497704877959283
Root 143 : 9.512467617653115
Root 144 : 9.523091128674778
Root 145 : 9.535037150717994
Root 146 : 9.549517703980705
Root 147 : 9.554060101282376
Root 148 : 9.565624438829746
Root 149 : 9.578996366926484
Root 150 : 9.589606454863453
Root 151 : 9.602917284093268
Root 152 : 9.607437922061726
Root 153 : 9.617786753273970
Root 154 : 9.626869975625572
Root 155 : 9.629328843255641
Root 156 : 9.645780730487946
Root 157 : 9.651904313742394
Root 158 : 9.653929740770932
Root 159 : 9.658814294642609
Root 160 : 9.662233884242857
Root 161 : 9.669677352646966
Root 162 : 9.684469358798447
Root 163 : 9.697032770411251
Root 164 : 9.699926790168773
Root 165 : 9.708282690773290
Root 166 : 9.724230742433077
Root 167 : 9.741167821373756
Root 168 : 9.746028395880669
Root 169 : 9.757551361345071
Root 170 : 9.769653794832017
Root 171 : 9.776883587945600
Root 172 : 9.780736502209150
Root 173 : 9.784758882631865
Root 174 : 9.795392294343770
Root 175 : 9.817325846483214
Root 176 : 9.820306516138196
Root 177 : 9.827602940191191
Root 178 : 9.833479935946606
Root 179 : 9.838546368412320
Root 180 : 9.861510050732257
Root 181 : 9.865575925480476
Root 182 : 9.872274653915930
Root 183 : 9.880057898421603
Root 184 : 9.893856474846357
Root 185 : 9.898148315470161
Root 186 : 9.914480528764456
Root 187 : 9.921445948364576
Root 188 : 9.923329709372899
Root 189 : 9.928962242892180
Root 190 : 9.938353376377018
Root 191 : 9.944238004177764
Root 192 : 9.947933149844728
Root 193 : 9.975849284294815
Root 194 : 9.984976754256554
Root 195 : 9.987716942874968
Root 196 : 9.992479835834390
Root 197 : 9.993659281228682
Root 198 : 10.010220217712785
Root 199 : 10.018386533839822
Root 200 : 10.025939374461020
Root 201 : 10.028139940723724
Root 202 : 10.032066312837772
Root 203 : 10.040036706211614
Root 204 : 10.050102904357304
Root 205 : 10.060180399082922
Root 206 : 10.069538429611159
Root 207 : 10.071327288332926
Root 208 : 10.083537743636478
Root 209 : 10.093185383366977
Root 210 : 10.100662245186307
Root 211 : 10.112858447245985
Root 212 : 10.114784429451609
Root 213 : 10.127759434016127
Root 214 : 10.130517323012995
Root 215 : 10.139734697336035
Root 216 : 10.145438117384504
Root 217 : 10.150951547095259
Root 218 : 10.159736456903667
Root 219 : 10.161938043935052
Root 220 : 10.171288908984499
Root 221 : 10.178749188689354
Root 222 : 10.187230363041696
Root 223 : 10.200853904588820
Root 224 : 10.201875075156938
Root 225 : 10.210289715762281
Root 226 : 10.218658394910639
Root 227 : 10.225019383193198
Root 228 : 10.229380753342824
Root 229 : 10.245719098532602
Root 230 : 10.248585062249767
Root 231 : 10.255551824494617
Root 232 : 10.258743939416016
Root 233 : 10.268158804690422
Root 234 : 10.276809372097015
Root 235 : 10.281624938680228
Root 236 : 10.286165723288603
Root 237 : 10.295343966221074
Root 238 : 10.307934627686134
Root 239 : 10.313108947474648
Root 240 : 10.321314588676493
Root 241 : 10.326992687193181
Root 242 : 10.332636171262894
Root 243 : 10.342112769501034
Root 244 : 10.345047561382113
Root 245 : 10.349817326882951
Root 246 : 10.364326786253008
Root 247 : 10.370404368252078
Root 248 : 10.383122956119703
Root 249 : 10.386896463087925
Root 250 : 10.402802522275637
Root 251 : 10.407114699562589
Root 252 : 10.411893362681811
Root 253 : 10.414990137927887
Root 254 : 10.424078053282097
Root 255 : 10.430751540376962
Root 256 : 10.435188501546248
Root 257 : 10.438436359705175
Root 258 : 10.442677124445732
Root 259 : 10.445388122549618
Root 260 : 10.450656073975789
Root 261 : 10.456556746879684
Root 262 : 10.465695561216522
Root 263 : 10.471248723037238
Root 264 : 10.478417538894266
Root 265 : 10.488599795484156
Root 266 : 10.490810469995969
Root 267 : 10.500203305152640
Root 268 : 10.507541834679069
Root 269 : 10.511104905820197
Root 270 : 10.518737882791044
Root 271 : 10.533228751659818
Root 272 : 10.536419501263911
Root 273 : 10.538384780101088
Root 274 : 10.549082305019486
Root 275 : 10.553609792336923
Root 276 : 10.559380900594483
Root 277 : 10.562914672265840
Root 278 : 10.570870147340372
Root 279 : 10.578271147082475
Root 280 : 10.583516852523411
Root 281 : 10.595274704701565
Root 282 : 10.598632738391023
Root 283 : 10.602065057491405
Root 284 : 10.610443645130564
Root 285 : 10.613385188029254
Root 286 : 10.624594166986416
Root 287 : 10.628344917348018
Root 288 : 10.631601340750375
Root 289 : 10.641443795527474
Root 290 : 10.649553440259233
Root 291 : 10.650677604068813
Root 292 : 10.661280307049912
Root 293 : 10.673064448168338
Root 294 : 10.673735659957092
Root 295 : 10.680186528154477
Root 296 : 10.690172060376723
Root 297 : 10.702832313883073
Root 298 : 10.716628856160941
Root 299 : 10.721344860002631
Root 300 : 10.731740811448530
Root 301 : 10.733255083077076
Root 302 : 10.741316379826646
Root 303 : 10.744169683736370
Root 304 : 10.753112092037313
Root 305 : 10.759839358341397
Root 306 : 10.765509099620518
Root 307 : 10.770733677783834
Root 308 : 10.773231130859172
Root 309 : 10.778371379597223
Root 310 : 10.779328277793594
Root 311 : 10.790514291164886
Root 312 : 10.794005944009497
Root 313 : 10.794911124366390
Root 314 : 10.804060719709778
Root 315 : 10.809630841948616
Root 316 : 10.812874618320098
Root 317 : 10.813908695903340
Root 318 : 10.819165748373607
Root 319 : 10.833277663452611
Root 320 : 10.834877313043073
Root 321 : 10.851487276817602
Root 322 : 10.856374428810037
Root 323 : 10.858425092676534
Root 324 : 10.868321580687866
Root 325 : 10.869787176216329
Root 326 : 10.872734932189367
Root 327 : 10.883822443074530
Root 328 : 10.887729948513710
Root 329 : 10.896109060147802
Root 330 : 10.897759058634707
Root 331 : 10.902349359703358
Root 332 : 10.907594261889498
Root 333 : 10.913704552641418
Root 334 : 10.921781203847294
Root 335 : 10.923509795930187
Root 336 : 10.927988706510575
Root 337 : 10.933959473126574
Root 338 : 10.940189459443554
Root 339 : 10.946946222005817
Root 340 : 10.956671299998826
Root 341 : 10.959508169793201
Root 342 : 10.963923718083995
Root 343 : 10.964897624276054
Root 344 : 10.972002126561156
Root 345 : 10.976441307191774
Root 346 : 10.980229587388230
Root 347 : 10.987015931277064
Root 348 : 10.988889578341992
Root 349 : 10.998702894364897
Root 350 : 11.001498614499294
Root 351 : 11.010605443826032
Root 352 : 11.015812454682223
Root 353 : 11.025209931908673
Root 354 : 11.030383717946215
Root 355 : 11.033660068589434
Root 356 : 11.038847334596234
Root 357 : 11.044273728355316
Root 358 : 11.051336479217195
Root 359 : 11.053098298323867
Root 360 : 11.058944825355846
Root 361 : 11.061995697484956
Root 362 : 11.068805714652424
Root 363 : 11.073181330561283
Root 364 : 11.077418876488901
Root 365 : 11.086737351794183
Root 366 : 11.089804436977616
Root 367 : 11.092353203538279
Root 368 : 11.099843989347978
Root 369 : 11.100730215775354
Root 370 : 11.110149699380944
Root 371 : 11.119638813032152
Root 372 : 11.120131260617422
Root 373 : 11.127026884601815
Root 374 : 11.127730397854622
Root 375 : 11.133967281190678
Root 376 : 11.140689590475441
Root 377 : 11.147198389812466
Root 378 : 11.158191078471621
Root 379 : 11.158991082995662
Root 380 : 11.166382374208503
Root 381 : 11.169594505801948
Root 382 : 11.173380989450822
Root 383 : 11.184729560823323
Root 384 : 11.188962648307815
Root 385 : 11.194681645473718
Root 386 : 11.199966093810149
Root 387 : 11.205161942752994
Root 388 : 11.212972514459292
Root 389 : 11.221163139446006
Root 390 : 11.231414680264583
Root 391 : 11.236998054592661
Root 392 : 11.247568512608144
Root 393 : 11.252197965881996
Root 394 : 11.269011249075618
Root 395 : 11.269601596954281
Root 396 : 11.279105932747946
Root 397 : 11.284050236483166
Root 398 : 11.308304643829816
Root 399 : 11.341990592436062
Root 400 : 11.881529456720822
Iteration 2 Dimension 600 NMult 400 NNew 200
CISAX will form 200 AO SS matrices at one time.
NMat= 200 NSing= 200 JSym2X= 0.
Root 1 not converged, maximum delta is 0.005507579751271
Root 2 not converged, maximum delta is 0.263021026772629
New state 3 was old state 4
Root 3 not converged, maximum delta is 0.209511537777152
New state 4 was old state 3
Root 4 not converged, maximum delta is 0.025712209045095
Root 5 not converged, maximum delta is 0.071030357746319
Root 6 not converged, maximum delta is 0.347828863121214
Root 7 not converged, maximum delta is 0.350424080332769
Root 8 not converged, maximum delta is 0.039258201667865
Root 9 not converged, maximum delta is 0.020159597545180
Root 10 not converged, maximum delta is 0.122864827600657
Root 11 not converged, maximum delta is 0.314958482814412
Root 12 not converged, maximum delta is 0.334096039960778
Root 13 not converged, maximum delta is 0.156668596734158
Root 14 not converged, maximum delta is 0.082194537496459
Root 15 not converged, maximum delta is 0.082589245672682
Root 16 not converged, maximum delta is 0.191491060902140
Root 17 not converged, maximum delta is 0.247246818589932
New state 18 was old state 19
Root 18 not converged, maximum delta is 0.331333529940942
New state 19 was old state 18
Root 19 not converged, maximum delta is 0.377990550035143
Root 20 not converged, maximum delta is 0.036995904916021
Root 21 not converged, maximum delta is 0.142423637263555
Root 22 not converged, maximum delta is 0.113581978023563
Root 23 not converged, maximum delta is 0.114544056650928
Root 24 not converged, maximum delta is 0.074048830198498
New state 25 was old state 26
Root 25 not converged, maximum delta is 0.202668303564408
New state 26 was old state 25
Root 26 not converged, maximum delta is 0.235303581341898
New state 27 was old state 28
Root 27 not converged, maximum delta is 0.193008128467240
New state 28 was old state 27
Root 28 not converged, maximum delta is 0.079682619631644
Root 29 not converged, maximum delta is 0.064297431686940
Root 30 not converged, maximum delta is 0.290348783316519
Root 31 not converged, maximum delta is 0.345854143027688
Root 32 not converged, maximum delta is 0.295475675819278
Root 33 not converged, maximum delta is 0.382982202576871
Root 34 not converged, maximum delta is 0.176990347101307
New state 35 was old state 36
Root 35 not converged, maximum delta is 0.299454672239579
New state 36 was old state 35
Root 36 not converged, maximum delta is 0.259937297508930
Root 37 not converged, maximum delta is 0.117437998696986
Root 38 not converged, maximum delta is 0.277887894765763
Root 39 not converged, maximum delta is 0.197229708280188
New state 40 was old state 41
Root 40 not converged, maximum delta is 0.236656044305372
New state 41 was old state 40
Root 41 not converged, maximum delta is 0.155128018605893
Root 42 not converged, maximum delta is 0.250435082421400
Root 43 not converged, maximum delta is 0.302623799951110
New state 44 was old state 47
Root 44 not converged, maximum delta is 0.222602082164586
New state 45 was old state 44
Root 45 not converged, maximum delta is 0.094700053104467
New state 46 was old state 45
Root 46 not converged, maximum delta is 0.157905897650634
New state 47 was old state 46
Root 47 not converged, maximum delta is 0.113141897623228
New state 48 was old state 49
Root 48 not converged, maximum delta is 0.311704443294652
New state 49 was old state 48
Root 49 not converged, maximum delta is 0.134002343019980
New state 50 was old state 55
Root 50 not converged, maximum delta is 0.348417043661548
Root 51 not converged, maximum delta is 0.153004560005619
New state 52 was old state 50
Root 52 not converged, maximum delta is 0.198684898356610
New state 53 was old state 52
Root 53 not converged, maximum delta is 0.141672281935542
New state 54 was old state 53
Root 54 not converged, maximum delta is 0.249994280955115
New state 55 was old state 54
Root 55 not converged, maximum delta is 0.196760276444814
New state 56 was old state 58
Root 56 not converged, maximum delta is 0.247991949526362
New state 57 was old state 56
Root 57 not converged, maximum delta is 0.060153184877183
New state 58 was old state 57
Root 58 not converged, maximum delta is 0.252466738194063
Root 59 not converged, maximum delta is 0.213567178757652
Root 60 not converged, maximum delta is 0.210465465264057
Root 61 not converged, maximum delta is 0.247000786911222
Root 62 not converged, maximum delta is 0.100276667051540
New state 63 was old state 64
Root 63 not converged, maximum delta is 0.242534455714639
New state 64 was old state 63
Root 64 not converged, maximum delta is 0.187786357561281
Root 65 not converged, maximum delta is 0.226454112271107
Root 66 not converged, maximum delta is 0.191662836015977
Root 67 not converged, maximum delta is 0.087762599177472
Root 68 not converged, maximum delta is 0.077417290983995
New state 69 was old state 70
Root 69 not converged, maximum delta is 0.205881098504945
New state 70 was old state 69
Root 70 not converged, maximum delta is 0.137474909196943
Root 71 not converged, maximum delta is 0.113721351242079
Root 72 not converged, maximum delta is 0.099337711543975
Root 73 not converged, maximum delta is 0.164722375744610
Root 74 not converged, maximum delta is 0.165675633915677
Root 75 not converged, maximum delta is 0.224768581155482
Root 76 not converged, maximum delta is 0.212574096930689
Root 77 not converged, maximum delta is 0.179196110163091
Root 78 not converged, maximum delta is 0.075176308196598
Root 79 not converged, maximum delta is 0.085505267587044
Root 80 not converged, maximum delta is 0.104973464567266
Root 81 not converged, maximum delta is 0.101039960507598
Root 82 not converged, maximum delta is 0.167375416297142
Root 83 not converged, maximum delta is 0.253825174401771
Root 84 not converged, maximum delta is 0.230259202652098
Root 85 not converged, maximum delta is 0.207410906788500
New state 86 was old state 88
Root 86 not converged, maximum delta is 0.377030219340280
New state 87 was old state 86
Root 87 not converged, maximum delta is 0.169301495521116
New state 88 was old state 89
Root 88 not converged, maximum delta is 0.347007626577778
New state 89 was old state 87
Root 89 not converged, maximum delta is 0.209826047553568
Root 90 not converged, maximum delta is 0.310885540894440
New state 91 was old state 97
Root 91 not converged, maximum delta is 0.306390027893596
New state 92 was old state 91
Root 92 not converged, maximum delta is 0.266935284792748
New state 93 was old state 92
Root 93 not converged, maximum delta is 0.114044497418175
New state 94 was old state 93
Root 94 not converged, maximum delta is 0.140646777069456
New state 95 was old state 94
Root 95 not converged, maximum delta is 0.095479522836943
New state 96 was old state 95
Root 96 not converged, maximum delta is 0.062611435083972
New state 97 was old state 96
Root 97 not converged, maximum delta is 0.150322512982026
Root 98 not converged, maximum delta is 0.150718879594829
Root 99 not converged, maximum delta is 0.169683319966129
Root 100 not converged, maximum delta is 0.273931779413163
Excitation Energies [eV] at current iteration:
Root 1 : 3.860270885922930 Change is -0.053931168768743
Root 2 : 4.999708630600438 Change is -0.177599941015194
Root 3 : 5.383246507469851 Change is -0.298753672110442
Root 4 : 5.599393474779799 Change is -0.024619240888729
Root 5 : 6.052646518393331 Change is -0.029210134516559
Root 6 : 6.317490143853070 Change is -0.067375367381768
Root 7 : 6.392495012314720 Change is -0.067559778122227
Root 8 : 6.556077873402344 Change is -0.022611983333495
Root 9 : 6.765111051042311 Change is -0.025294270439960
Root 10 : 6.839990343668527 Change is -0.034030567321298
Root 11 : 6.859563653766983 Change is -0.025269843233265
Root 12 : 6.877101656392437 Change is -0.076310909114984
Root 13 : 6.963777533509992 Change is -0.023072173316224
Root 14 : 6.982534018261402 Change is -0.010535782321995
Root 15 : 7.055376898160393 Change is -0.056941531827108
Root 16 : 7.159200820768293 Change is -0.016482980944658
Root 17 : 7.167673287205914 Change is -0.024629118513126
Root 18 : 7.204499331447895 Change is -0.036623452461629
Root 19 : 7.221041580301357 Change is -0.011616884025583
Root 20 : 7.295460665881151 Change is -0.022701569828017
Root 21 : 7.321060908758325 Change is -0.057486054186279
Root 22 : 7.414090491243136 Change is -0.035245176868470
Root 23 : 7.433554376351230 Change is -0.045250575715323
Root 24 : 7.517427929865416 Change is -0.022330698242832
Root 25 : 7.561508037229074 Change is -0.068406230526321
Root 26 : 7.586724125576623 Change is -0.017463147711591
Root 27 : 7.618549396988384 Change is -0.037512707131050
Root 28 : 7.639766427704983 Change is -0.013527470838992
Root 29 : 7.664210186522389 Change is -0.015336002069777
Root 30 : 7.688477675192934 Change is -0.029442426886543
Root 31 : 7.703103274532533 Change is -0.054629291950355
Root 32 : 7.757218181654793 Change is -0.022969330469238
Root 33 : 7.773467181371071 Change is -0.024340597334507
Root 34 : 7.811499159551025 Change is -0.019455198790663
Root 35 : 7.850386516214556 Change is -0.049618162353401
Root 36 : 7.866789192845370 Change is -0.022018831284459
Root 37 : 7.894598762067932 Change is -0.017181122028166
Root 38 : 7.927885031546482 Change is -0.031809325629573
Root 39 : 7.954930303666770 Change is -0.041430436094499
Root 40 : 7.999291719571127 Change is -0.026332807443629
Root 41 : 8.006246190530845 Change is -0.014322182488370
Root 42 : 8.033151974526463 Change is -0.023524424304674
Root 43 : 8.040611385081782 Change is -0.027862428573542
Root 44 : 8.071498648495558 Change is -0.082592853142398
Root 45 : 8.085869906796374 Change is -0.020046333062359
Root 46 : 8.095145017521963 Change is -0.020896879084116
Root 47 : 8.112562926903031 Change is -0.013712217257833
Root 48 : 8.120958267983307 Change is -0.099318942563591
Root 49 : 8.139359500918150 Change is -0.032791362340429
Root 50 : 8.195254149371436 Change is -0.129791690676893
Root 51 : 8.230681906355626 Change is -0.030063402099368
Root 52 : 8.239646334693484 Change is -0.019597245688880
Root 53 : 8.259513893493118 Change is -0.021859114010447
Root 54 : 8.284746333248991 Change is -0.021303138959620
Root 55 : 8.285978081059451 Change is -0.024527588884079
Root 56 : 8.325460026378554 Change is -0.053718681658624
Root 57 : 8.326521356346033 Change is -0.029423680308939
Root 58 : 8.351380296832451 Change is -0.017555852212840
Root 59 : 8.377363946701248 Change is -0.029310026783485
Root 60 : 8.390108064941886 Change is -0.021742203069543
Root 61 : 8.400115329216252 Change is -0.037605416681742
Root 62 : 8.420803553292451 Change is -0.027102584796847
Root 63 : 8.441817956665588 Change is -0.040360022307171
Root 64 : 8.454623638758722 Change is -0.018232346030565
Root 65 : 8.465248853582539 Change is -0.018643969358870
Root 66 : 8.475149182179511 Change is -0.022230069936951
Root 67 : 8.500332597332454 Change is -0.041959496546244
Root 68 : 8.535132594522940 Change is -0.023355408581803
Root 69 : 8.537005648593478 Change is -0.038311792625258
Root 70 : 8.544430100352244 Change is -0.019435362203170
Root 71 : 8.580837742982082 Change is -0.015403810059999
Root 72 : 8.583193395039659 Change is -0.021653667038270
Root 73 : 8.603965156920678 Change is -0.033658547936557
Root 74 : 8.626083232384559 Change is -0.025547758921324
Root 75 : 8.642905423810163 Change is -0.020047602592850
Root 76 : 8.649466209711450 Change is -0.029806528354683
Root 77 : 8.667411940073867 Change is -0.032454367377305
Root 78 : 8.689262272607060 Change is -0.024530886932630
Root 79 : 8.704189461455563 Change is -0.025924865297504
Root 80 : 8.716675833738396 Change is -0.030306453628160
Root 81 : 8.727533945024009 Change is -0.026262144560334
Root 82 : 8.758664904637737 Change is -0.023776176279135
Root 83 : 8.760950921729977 Change is -0.040871730472870
Root 84 : 8.772135855995751 Change is -0.037733401758524
Root 85 : 8.784788800286870 Change is -0.036744892939868
Root 86 : 8.807358984883674 Change is -0.047122228622141
Root 87 : 8.816973379861309 Change is -0.023570610150328
Root 88 : 8.826965129557875 Change is -0.038662213338882
Root 89 : 8.831125019767853 Change is -0.017470386932911
Root 90 : 8.851547180106945 Change is -0.027415383068756
Root 91 : 8.866212297392124 Change is -0.131435469508881
Root 92 : 8.878179141029747 Change is -0.017381787426776
Root 93 : 8.887926751219993 Change is -0.024985261505492
Root 94 : 8.901511419328003 Change is -0.019281327519322
Root 95 : 8.933882840283792 Change is -0.025216744048419
Root 96 : 8.940666585832220 Change is -0.027616311345734
Root 97 : 8.957799838967905 Change is -0.031257265804517
Root 98 : 8.987997195045914 Change is -0.031095277481740
Root 99 : 8.998979121967237 Change is -0.027155196809997
Root 100 : 9.004200636300114 Change is -0.029966249974759
Iteration 3 Dimension 800 NMult 600 NNew 200
CISAX will form 200 AO SS matrices at one time.
NMat= 200 NSing= 200 JSym2X= 0.
Root 1 has converged.
Root 2 not converged, maximum delta is 0.003514281234418
Root 3 not converged, maximum delta is 0.002765387087887
Root 4 has converged.
Root 5 has converged.
Root 6 not converged, maximum delta is 0.003790119071900
Root 7 not converged, maximum delta is 0.004266216456899
Root 8 has converged.
Root 9 has converged.
Root 10 not converged, maximum delta is 0.004122583907890
Root 11 not converged, maximum delta is 0.011663221833613
Root 12 not converged, maximum delta is 0.012034536611299
Root 13 not converged, maximum delta is 0.001323165679413
Root 14 has converged.
Root 15 not converged, maximum delta is 0.001655206192542
Root 16 not converged, maximum delta is 0.011684591092024
Root 17 not converged, maximum delta is 0.009113426590791
Root 18 not converged, maximum delta is 0.002276334917072
Root 19 not converged, maximum delta is 0.001218634444114
Root 20 not converged, maximum delta is 0.001674242976391
Root 21 not converged, maximum delta is 0.002984404207162
Root 22 not converged, maximum delta is 0.001598685606852
Root 23 not converged, maximum delta is 0.003417137518294
Root 24 not converged, maximum delta is 0.002518225614143
Root 25 not converged, maximum delta is 0.005006570194879
Root 26 not converged, maximum delta is 0.006634270863875
Root 27 not converged, maximum delta is 0.006960761025217
Root 28 not converged, maximum delta is 0.001269276735196
Root 29 not converged, maximum delta is 0.001063535676892
Root 30 not converged, maximum delta is 0.011805998875157
Root 31 not converged, maximum delta is 0.013978060687357
Root 32 not converged, maximum delta is 0.002805640958139
Root 33 not converged, maximum delta is 0.003079168475137
Root 34 not converged, maximum delta is 0.003057224054727
Root 35 not converged, maximum delta is 0.009853160429728
Root 36 not converged, maximum delta is 0.009436603014924
Root 37 not converged, maximum delta is 0.003528717674907
Root 38 not converged, maximum delta is 0.003401718194703
Root 39 not converged, maximum delta is 0.002730845211435
Root 40 not converged, maximum delta is 0.007889917627852
Root 41 not converged, maximum delta is 0.002432151761795
Root 42 not converged, maximum delta is 0.035816868702468
Root 43 not converged, maximum delta is 0.040609979196356
Root 44 not converged, maximum delta is 0.026041205522815
Root 45 not converged, maximum delta is 0.004070484907847
Root 46 not converged, maximum delta is 0.009094981977691
Root 47 not converged, maximum delta is 0.023679306090541
Root 48 not converged, maximum delta is 0.028708568129276
Root 49 not converged, maximum delta is 0.003923131762954
Root 50 not converged, maximum delta is 0.009141467153952
Root 51 not converged, maximum delta is 0.007670610801079
Root 52 not converged, maximum delta is 0.010363953420856
Root 53 not converged, maximum delta is 0.007533220806663
Root 54 not converged, maximum delta is 0.026998172001067
Root 55 not converged, maximum delta is 0.028029357031863
Root 56 not converged, maximum delta is 0.004633824640445
Root 57 not converged, maximum delta is 0.005884922486865
Root 58 not converged, maximum delta is 0.002084891767847
Root 59 not converged, maximum delta is 0.008460318906573
Root 60 not converged, maximum delta is 0.009840987519251
Root 61 not converged, maximum delta is 0.009651687433955
Root 62 not converged, maximum delta is 0.001897310533709
Root 63 not converged, maximum delta is 0.004082696310511
Root 64 not converged, maximum delta is 0.004753210006348
Root 65 not converged, maximum delta is 0.005296429322631
Root 66 not converged, maximum delta is 0.005148542822502
Root 67 not converged, maximum delta is 0.003499789748300
Root 68 not converged, maximum delta is 0.006536116415544
Root 69 not converged, maximum delta is 0.013235274805979
Root 70 not converged, maximum delta is 0.007605852479768
Root 71 not converged, maximum delta is 0.005244734399023
Root 72 not converged, maximum delta is 0.002702490946543
Root 73 not converged, maximum delta is 0.004733230173218
Root 74 not converged, maximum delta is 0.006903597592346
Root 75 not converged, maximum delta is 0.012581353591030
Root 76 not converged, maximum delta is 0.010811231269611
Root 77 not converged, maximum delta is 0.004603626125239
Root 78 not converged, maximum delta is 0.005079780041223
Root 79 not converged, maximum delta is 0.004055091110066
Root 80 not converged, maximum delta is 0.004340389130435
Root 81 not converged, maximum delta is 0.003304911866226
Root 82 not converged, maximum delta is 0.053026032402848
Root 83 not converged, maximum delta is 0.077108651587601
Root 84 not converged, maximum delta is 0.012926553190572
Root 85 not converged, maximum delta is 0.003721776594104
Root 86 not converged, maximum delta is 0.015246784654887
Root 87 not converged, maximum delta is 0.011379876172269
Root 88 not converged, maximum delta is 0.017980291385879
Root 89 not converged, maximum delta is 0.006031340505414
Root 90 not converged, maximum delta is 0.076357100048818
Root 91 not converged, maximum delta is 0.059480682470215
Root 92 not converged, maximum delta is 0.064136349965620
Root 93 not converged, maximum delta is 0.020977227529823
Root 94 not converged, maximum delta is 0.012644086309737
Root 95 not converged, maximum delta is 0.003628256240834
Root 96 not converged, maximum delta is 0.003572553758369
Root 97 not converged, maximum delta is 0.011439764110137
Root 98 not converged, maximum delta is 0.040619232077983
Root 99 not converged, maximum delta is 0.049633357116324
Root 100 not converged, maximum delta is 0.076247309148769
Excitation Energies [eV] at current iteration:
Root 1 : 3.859724272883834 Change is -0.000546613039096
Root 2 : 4.996626809090237 Change is -0.003081821510199
Root 3 : 5.381223112351264 Change is -0.002023395118587
Root 4 : 5.598986461808483 Change is -0.000407012971316
Root 5 : 6.052202436499215 Change is -0.000444081894117
Root 6 : 6.316604604567006 Change is -0.000885539286064
Root 7 : 6.391631706120672 Change is -0.000863306194047
Root 8 : 6.555734765873255 Change is -0.000343107529089
Root 9 : 6.764716068327517 Change is -0.000394982714794
Root 10 : 6.839474442452378 Change is -0.000515901216148
Root 11 : 6.858824465146372 Change is -0.000739188620611
Root 12 : 6.875949463159304 Change is -0.001152193233132
Root 13 : 6.963523607326663 Change is -0.000253926183329
Root 14 : 6.982358823854751 Change is -0.000175194406652
Root 15 : 7.054262568460377 Change is -0.001114329700016
Root 16 : 7.158813580417837 Change is -0.000387240350456
Root 17 : 7.167243980415914 Change is -0.000429306790000
Root 18 : 7.203981340832068 Change is -0.000517990615827
Root 19 : 7.220782741359557 Change is -0.000258838941800
Root 20 : 7.295041998720750 Change is -0.000418667160401
Root 21 : 7.320150393030307 Change is -0.000910515728018
Root 22 : 7.413616094696359 Change is -0.000474396546776
Root 23 : 7.432446865483206 Change is -0.001107510868024
Root 24 : 7.516979141305437 Change is -0.000448788559980
Root 25 : 7.560266849212656 Change is -0.001241188016418
Root 26 : 7.586233717809876 Change is -0.000490407766748
Root 27 : 7.617274305280603 Change is -0.001275091707781
Root 28 : 7.639560786235582 Change is -0.000205641469402
Root 29 : 7.663964286135615 Change is -0.000245900386774
Root 30 : 7.687208505502612 Change is -0.001269169690322
Root 31 : 7.702494416014300 Change is -0.000608858518233
Root 32 : 7.756712745438354 Change is -0.000505436216440
Root 33 : 7.773218307821897 Change is -0.000248873549174
Root 34 : 7.811176263410806 Change is -0.000322896140220
Root 35 : 7.849014068227442 Change is -0.001372447987114
Root 36 : 7.866115930916873 Change is -0.000673261928497
Root 37 : 7.894234879793870 Change is -0.000363882274062
Root 38 : 7.927195515152476 Change is -0.000689516394006
Root 39 : 7.954281760220356 Change is -0.000648543446414
Root 40 : 7.998734199154581 Change is -0.000557520416547
Root 41 : 8.005975472169119 Change is -0.000270718361726
Root 42 : 8.031870362096639 Change is -0.001281612429824
Root 43 : 8.039752529620049 Change is -0.000858855461733
Root 44 : 8.068814559228935 Change is -0.002684089266623
Root 45 : 8.085398280107007 Change is -0.000471626689367
Root 46 : 8.094530903632011 Change is -0.000614113889952
Root 47 : 8.112136563434035 Change is -0.000426363468996
Root 48 : 8.119155266020995 Change is -0.001803001962312
Root 49 : 8.138636447993187 Change is -0.000723052924964
Root 50 : 8.193390606351471 Change is -0.001863543019966
Root 51 : 8.229362087823912 Change is -0.001319818531714
Root 52 : 8.239207163205526 Change is -0.000439171487958
Root 53 : 8.259054222959334 Change is -0.000459670533784
Root 54 : 8.284168897766708 Change is -0.000577435482283
Root 55 : 8.285512295463066 Change is -0.000465785596384
Root 56 : 8.324747657543925 Change is -0.000712368834628
Root 57 : 8.325888574953678 Change is -0.000632781392354
Root 58 : 8.350906583562066 Change is -0.000473713270385
Root 59 : 8.376670583593780 Change is -0.000693363107468
Root 60 : 8.389587413441081 Change is -0.000520651500805
Root 61 : 8.399377153045567 Change is -0.000738176170686
Root 62 : 8.420147370453650 Change is -0.000656182838801
Root 63 : 8.441197963255389 Change is -0.000619993410199
Root 64 : 8.454037087002952 Change is -0.000586551755769
Root 65 : 8.464822405670345 Change is -0.000426447912194
Root 66 : 8.474773805673854 Change is -0.000375376505657
Root 67 : 8.499128012227263 Change is -0.001204585105190
Root 68 : 8.534558924137645 Change is -0.000573670385295
Root 69 : 8.536183067288906 Change is -0.000822581304572
Root 70 : 8.543889343619940 Change is -0.000540756732304
Root 71 : 8.580394693350707 Change is -0.000443049631374
Root 72 : 8.582811813052855 Change is -0.000381581986805
Root 73 : 8.603003823254289 Change is -0.000961333666389
Root 74 : 8.625439923318851 Change is -0.000643309065709
Root 75 : 8.642411050114628 Change is -0.000494373695535
Root 76 : 8.648822734005346 Change is -0.000643475706103
Root 77 : 8.666670701115061 Change is -0.000741238958806
Root 78 : 8.688612271338952 Change is -0.000650001268108
Root 79 : 8.703390289047512 Change is -0.000799172408052
Root 80 : 8.715859329268898 Change is -0.000816504469497
Root 81 : 8.726803255428976 Change is -0.000730689595034
Root 82 : 8.757871675108197 Change is -0.000793229529540
Root 83 : 8.759962536072242 Change is -0.000988385657735
Root 84 : 8.770957504749624 Change is -0.001178351246127
Root 85 : 8.783973597560756 Change is -0.000815202726115
Root 86 : 8.806107907079731 Change is -0.001251077803942
Root 87 : 8.816269109239057 Change is -0.000704270622252
Root 88 : 8.825932505011229 Change is -0.001032624546645
Root 89 : 8.830681042914776 Change is -0.000443976853077
Root 90 : 8.850040903038558 Change is -0.001506277068386
Root 91 : 8.862589811307586 Change is -0.003622486084538
Root 92 : 8.876958234895797 Change is -0.001220906133950
Root 93 : 8.887175067801294 Change is -0.000751683418700
Root 94 : 8.900761473660349 Change is -0.000749945667653
Root 95 : 8.933200067013576 Change is -0.000682773270215
Root 96 : 8.939967391769237 Change is -0.000699194062983
Root 97 : 8.956597047123587 Change is -0.001202791844317
Root 98 : 8.986521520051284 Change is -0.001475674994630
Root 99 : 8.997900049407264 Change is -0.001079072559973
Root 100 : 9.002611148565377 Change is -0.001589487734738
Iteration 4 Dimension 988 NMult 800 NNew 188
CISAX will form 188 AO SS matrices at one time.
NMat= 188 NSing= 188 JSym2X= 0.
Root 1 has converged.
Root 2 has converged.
Root 3 has converged.
Root 4 has converged.
Root 5 has converged.
Root 6 has converged.
Root 7 has converged.
Root 8 has converged.
Root 9 has converged.
Root 10 has converged.
Root 11 has converged.
Root 12 has converged.
Root 13 has converged.
Root 14 has converged.
Root 15 has converged.
Root 16 has converged.
Root 17 has converged.
Root 18 has converged.
Root 19 has converged.
Root 20 has converged.
Root 21 has converged.
Root 22 has converged.
Root 23 has converged.
Root 24 has converged.
Root 25 has converged.
Root 26 has converged.
Root 27 has converged.
Root 28 has converged.
Root 29 has converged.
Root 30 has converged.
Root 31 has converged.
Root 32 has converged.
Root 33 has converged.
Root 34 has converged.
Root 35 has converged.
Root 36 has converged.
Root 37 has converged.
Root 38 has converged.
Root 39 has converged.
Root 40 has converged.
Root 41 has converged.
Root 42 not converged, maximum delta is 0.002210884200834
Root 43 not converged, maximum delta is 0.002504091124764
Root 44 not converged, maximum delta is 0.001652236834617
Root 45 has converged.
Root 46 has converged.
Root 47 not converged, maximum delta is 0.001952215138604
Root 48 not converged, maximum delta is 0.002309122298832
Root 49 has converged.
Root 50 has converged.
Root 51 has converged.
Root 52 has converged.
Root 53 has converged.
Root 54 not converged, maximum delta is 0.001920290956418
Root 55 not converged, maximum delta is 0.002044874390787
Root 56 not converged, maximum delta is 0.001285033410052
Root 57 not converged, maximum delta is 0.001663965076353
Root 58 has converged.
Root 59 has converged.
Root 60 has converged.
Root 61 has converged.
Root 62 has converged.
Root 63 has converged.
Root 64 has converged.
Root 65 has converged.
Root 66 has converged.
Root 67 has converged.
Root 68 has converged.
Root 69 has converged.
Root 70 has converged.
Root 71 has converged.
Root 72 has converged.
Root 73 has converged.
Root 74 has converged.
Root 75 has converged.
Root 76 has converged.
Root 77 has converged.
Root 78 has converged.
Root 79 has converged.
Root 80 has converged.
Root 81 has converged.
Root 82 not converged, maximum delta is 0.004526228320829
Root 83 not converged, maximum delta is 0.006137570097109
Root 84 not converged, maximum delta is 0.001018663221767
Root 85 has converged.
Root 86 has converged.
Root 87 has converged.
Root 88 has converged.
Root 89 has converged.
Root 90 not converged, maximum delta is 0.002749980110901
Root 91 not converged, maximum delta is 0.001587071023280
Root 92 not converged, maximum delta is 0.001418208542934
Root 93 has converged.
Root 94 has converged.
Root 95 has converged.
Root 96 has converged.
Root 97 has converged.
Root 98 not converged, maximum delta is 0.003758232080799
Root 99 not converged, maximum delta is 0.003651733557898
Root 100 not converged, maximum delta is 0.004457511360309
Excitation Energies [eV] at current iteration:
Root 1 : 3.859719940952108 Change is -0.000004331931726
Root 2 : 4.996573864143653 Change is -0.000052944946584
Root 3 : 5.381182033503339 Change is -0.000041078847925
[truncated: 2,796 more rows]

## Sheet: 6-ls4
!====================================================================================!
! !
! LIST OF CONFORMERS (LIST FORM 4) !
! !
!------------------------------------------------------------------------------------!
! !
! DATE: 2020/01/14 TIME: 21:07:45.20 !
! OEE9-3-8-5: !
! EMPIRICAL FORMULA: C15H26O3 MW = 254.188 !
! FORCE FIELD: MMFF94S(2010-12-04HG) !
! TOTAL NUMBER OF CONFORMERS FOUND: 352 !
! STERIC ENERGY: EMIN= 49.0666 EMAX= 71.0368 EAVE= 49.1205 !
! GIBB'S FREE ENERGY: GMIN= 266.6900 GMAX= 287.4582 GAVE= 266.7351 !
! MIXING ENERGIES: HMIX= 304.8240 TSMIX= 38.1435 GMIX= 266.6805 !
! MIXING HEAT CAPACITY: CPMIX= 75.8181 !
! TEMPERATURE: 25.00 CELSIUS ( 298.15 KELVIN) !
! !
!------------------------------------------------------------------------------------!
! !
! DEFINITIONS: !
! NO. = INDEX NUMBER IN THE ORDER OF THE TOTAL GIBBS'S FREE ENERGY !
! CONF. ID = IDENTIFICATION NUMBER OF EACH CONFORMER !
! HE = ENTHALPY CONTRIBUTION OF EACH CONFORMER (KCAL/MOL) !
! TSE = ENTROPY (MULRPLIED BY TEMP.) CONTRIBUTION OF EACH CONFORMER (KCAL/MOL)!
! GE = TOTAL GIBB'S FREE ENERGY OF EACH CONFORMER (KCAL/MOL) !
! DGE = RELATIVE GIBB'S FREE ENERGY OF EACH CONFORMER (KCAL/MOL) !
! GEPOP = DISTRIBUTION IN GIBB'S FREE ENERGY (%) !
! SE = STERIC ENERGY OF EACH CONFORMER (KCAL/MOL) !
! DSE = RELATIVE STERIC ENERGY FROM THE GLOBAL ENERGY MINIMUM (KCAL/MOL) !
! SEPOP = DISTRIBUTION BASED ON STERIC ENERGY (%) !
! CHIRAL = CHIRALITY EXISTANCE OF EACH CONFORMER !
! SYM. NUM. = SYMMETRY NUMBER OF EACH CONFORMER !
! POINT GROUP = POINT GROUP OF SYMMETRY OF EACH CONFORMER !
! INIT. = FLAG OF EACH CONFORMER THAT HAD USED FOR INITIAL STRUCTURE !
! REOPT. = FLAG OF EACH CONFORMER THAT HAD BEEN OPTIMIZED AGAIN !
! NO. NEG. = NUMBER OF NEGATIVE EIGEN VALUES OF EACH CONFORMER !
! !
!====================================================================================!
========================================================================================================================================
CONF. SYM. POINT NO.
NO. ID HE TSE GE DGE GPOP SE DSE EPOP CHIRAL NUM. GROUP INIT. REOPT. NEG.
----------------------------------------------------------------------------------------------------------------------------------------
1 00000020 304.7806 38.0907 266.6900 0.0000 98.4179 49.0666 0.0000 97.8136 T 1 C1 T F 0
2 00000022 307.1473 37.9050 269.2423 2.5523 1.3250 51.3781 2.3115 1.9772 T 1 C1 T F 0
3 00000028 308.5778 37.9275 270.6503 3.9603 0.1231 52.7671 3.7005 0.1896 T 1 C1 T F 0
4 00000021 309.5754 38.7353 270.8401 4.1502 0.0893 54.4958 5.4292 0.0103 T 1 C1 T F 0
5 00000025 310.9032 38.8045 272.0988 5.4088 0.0107 55.3867 6.3201 0.0023 T 1 C1 T F 0
6 00000027 310.8039 38.6975 272.1064 5.4164 0.0105 55.5796 6.5130 0.0016 T 1 C1 T F 0
7 00000026 310.8792 38.5435 272.3356 5.6457 0.0072 55.2549 6.1883 0.0028 T 1 C1 T F 0
8 00000035 312.1922 39.2434 272.9488 6.2588 0.0025 57.0396 7.9730 0.0001 T 1 C1 T F 0
9 00000019 312.4362 39.4838 272.9524 6.2624 0.0025 57.3316 8.2650 0.0001 T 1 C1 T F 0
10 00000053 311.4474 38.0276 273.4199 6.7299 0.0011 55.8013 6.7347 0.0011 T 1 C1 T F 0
11 00000091 312.8296 39.2466 273.5830 6.8931 0.0009 57.6187 8.5521 0.0001 T 1 C1 T F 0
12 00000060 312.8380 39.1856 273.6525 6.9625 0.0008 57.8354 8.7688 0.0000 T 1 C1 T F 0
13 00000052 312.8880 39.2182 273.6699 6.9799 0.0008 57.6485 8.5818 0.0001 T 1 C1 T F 0
14 00000008 313.2145 39.4817 273.7327 7.0428 0.0007 58.2595 9.1929 0.0000 T 1 C1 T F 0
15 00000089 313.1244 39.3218 273.8026 7.1127 0.0006 57.9130 8.8463 0.0000 T 1 C1 T F 0
16 00000073 313.7320 39.6628 274.0693 7.3793 0.0004 58.6295 9.5629 0.0000 T 1 C1 T F 0
17 00000015 313.2837 39.2137 274.0700 7.3801 0.0004 58.3073 9.2407 0.0000 T 1 C1 T F 0
18 00000055 313.3675 39.2384 274.1292 7.4392 0.0003 58.3903 9.3237 0.0000 T 1 C1 T F 0
19 00000093 313.6593 39.4189 274.2404 7.5505 0.0003 58.5636 9.4970 0.0000 T 1 C1 T F 0
20 00000071 313.7458 39.4552 274.2906 7.6007 0.0003 58.6487 9.5821 0.0000 T 1 C1 T F 0
21 00000159 312.8828 38.5855 274.2973 7.6073 0.0003 57.3314 8.2648 0.0001 T 1 C1 T F 0
22 00000107 313.5792 39.2487 274.3306 7.6406 0.0002 58.4758 9.4092 0.0000 T 1 C1 T F 0
23 00000014 313.7870 39.4035 274.3835 7.6935 0.0002 58.8529 9.7863 0.0000 T 1 C1 T F 0
24 00000043 313.5659 39.1351 274.4308 7.7409 0.0002 58.6867 9.6201 0.0000 T 1 C1 T F 0
25 00000050 313.6281 39.1929 274.4352 7.7453 0.0002 58.4487 9.3821 0.0000 T 1 C1 T F 0
26 00000037 312.5407 38.0978 274.4429 7.7529 0.0002 56.9253 7.8587 0.0002 T 1 C1 T F 0
27 00000101 313.7795 39.2933 274.4862 7.7963 0.0002 58.8244 9.7578 0.0000 T 1 C1 T F 0
28 00000032 313.2304 38.6120 274.6184 7.9284 0.0002 57.5846 8.5180 0.0001 T 1 C1 T F 0
29 00000083 314.0014 39.3817 274.6197 7.9297 0.0002 58.9897 9.9230 0.0000 T 1 C1 T F 0
30 00000074 314.0479 39.3907 274.6571 7.9672 0.0001 58.9182 9.8516 0.0000 T 1 C1 T F 0
31 00000138 314.0294 39.3690 274.6604 7.9705 0.0001 58.7942 9.7276 0.0000 T 1 C1 T F 0
32 00000094 313.9914 39.3073 274.6841 7.9942 0.0001 58.8618 9.7952 0.0000 T 1 C1 T F 0
33 00000090 314.0799 39.3781 274.7017 8.0118 0.0001 58.9445 9.8779 0.0000 T 1 C1 T F 0
34 00000017 314.2351 39.4886 274.7465 8.0565 0.0001 59.2454 10.1788 0.0000 T 1 C1 T F 0
35 00000108 314.0034 39.1934 274.8100 8.1201 0.0001 58.8827 9.8161 0.0000 T 1 C1 T F 0
36 00000033 313.0996 38.2804 274.8192 8.1292 0.0001 57.3475 8.2809 0.0001 T 1 C1 T F 0
37 00000084 314.0528 39.2224 274.8304 8.1404 0.0001 59.1050 10.0383 0.0000 T 1 C1 T F 0
38 00000057 312.8057 37.8729 274.9327 8.2428 0.0001 57.0374 7.9708 0.0001 T 1 C1 T F 0
39 00000041 314.2046 39.2602 274.9444 8.2545 0.0001 58.9654 9.8988 0.0000 T 1 C1 T F 0
40 00000155 313.6127 38.6504 274.9623 8.2723 0.0001 58.1671 9.1005 0.0000 T 1 C1 T F 0
41 00000160 313.6511 38.5821 275.0689 8.3790 0.0001 58.1181 9.0515 0.0000 T 1 C1 T F 0
42 00000167 313.7283 38.6231 275.1052 8.4152 0.0001 58.2217 9.1550 0.0000 T 1 C1 T F 0
43 00000151 313.5666 38.4533 275.1132 8.4233 0.0001 57.9661 8.8995 0.0000 T 1 C1 T F 0
44 00000068 314.4832 39.3360 275.1472 8.4573 0.0001 59.3496 10.2830 0.0000 T 1 C1 T F 0
45 00000117 314.5640 39.4163 275.1477 8.4577 0.0001 59.5958 10.5292 0.0000 T 1 C1 T F 0
46 00000018 314.5791 39.3899 275.1892 8.4992 0.0001 59.5853 10.5187 0.0000 T 1 C1 T F 0
47 00000072 314.5500 39.3562 275.1938 8.5038 0.0001 59.4468 10.3802 0.0000 T 1 C1 T F 0
48 00000170 314.8706 39.5351 275.3355 8.6455 0.0000 59.7038 10.6372 0.0000 T 1 C1 T F 0
49 00000168 314.3036 38.9401 275.3635 8.6736 0.0000 58.9298 9.8632 0.0000 T 1 C1 T F 0
50 00000086 314.7645 39.3657 275.3988 8.7088 0.0000 59.7838 10.7171 0.0000 T 1 C1 T F 0
51 00000104 314.7446 39.3162 275.4284 8.7384 0.0000 59.8212 10.7546 0.0000 T 1 C1 T F 0
52 00000100 314.6797 39.2457 275.4341 8.7441 0.0000 59.6766 10.6100 0.0000 T 1 C1 T F 0
53 00000042 314.7470 39.3110 275.4360 8.7460 0.0000 59.5743 10.5077 0.0000 T 1 C1 T F 0
54 00000080 315.0912 39.6418 275.4494 8.7594 0.0000 59.9192 10.8526 0.0000 T 1 C1 T F 0
55 00000147 314.0963 38.6230 275.4734 8.7834 0.0000 58.5793 9.5127 0.0000 T 1 C1 T F 0
56 00000069 314.8671 39.3745 275.4927 8.8027 0.0000 59.7206 10.6540 0.0000 T 1 C1 T F 0
57 00000079 314.8756 39.3720 275.5036 8.8137 0.0000 59.6920 10.6254 0.0000 T 1 C1 T F 0
58 00000095 314.7768 39.2560 275.5208 8.8308 0.0000 59.5267 10.4601 0.0000 T 1 C1 T F 0
59 00000126 314.8523 39.2889 275.5633 8.8734 0.0000 59.6960 10.6294 0.0000 T 1 C1 T F 0
60 00000039 313.7275 38.1500 275.5775 8.8875 0.0000 58.0546 8.9879 0.0000 T 1 C1 T F 0
61 00000129 314.8721 39.2918 275.5802 8.8903 0.0000 59.7460 10.6793 0.0000 T 1 C1 T F 0
62 00000113 314.9606 39.3788 275.5817 8.8918 0.0000 59.9890 10.9224 0.0000 T 1 C1 T F 0
63 00000114 314.9557 39.3704 275.5853 8.8953 0.0000 59.8513 10.7847 0.0000 T 1 C1 T F 0
64 00000166 314.2771 38.6528 275.6243 8.9343 0.0000 58.7393 9.6727 0.0000 T 1 C1 T F 0
65 00000173 314.2832 38.6241 275.6591 8.9692 0.0000 58.7828 9.7162 0.0000 T 1 C1 T F 0
66 00000174 314.2281 38.5618 275.6662 8.9763 0.0000 58.6565 9.5899 0.0000 T 1 C1 T F 0
67 00000125 314.9420 39.2644 275.6776 8.9876 0.0000 59.7533 10.6867 0.0000 T 1 C1 T F 0
68 00000156 314.3040 38.5707 275.7333 9.0434 0.0000 58.6772 9.6106 0.0000 T 1 C1 T F 0
69 00000137 314.7480 39.0118 275.7362 9.0462 0.0000 59.6512 10.5846 0.0000 T 1 C1 T F 0
70 00000070 315.2132 39.3486 275.8646 9.1746 0.0000 60.1377 11.0710 0.0000 T 1 C1 T F 0
71 00000115 315.2530 39.3759 275.8771 9.1871 0.0000 60.1195 11.0529 0.0000 T 1 C1 T F 0
72 00000162 314.8078 38.9261 275.8817 9.1917 0.0000 59.5550 10.4884 0.0000 T 1 C1 T F 0
73 00000012 314.5880 38.7020 275.8860 9.1961 0.0000 59.3842 10.3176 0.0000 T 1 C1 T F 0
74 00000163 315.5026 39.6045 275.8981 9.2082 0.0000 60.4286 11.3620 0.0000 T 1 C1 T F 0
75 00000016 315.2892 39.3857 275.9035 9.2136 0.0000 60.2938 11.2272 0.0000 T 1 C1 T F 0
76 00000064 315.0176 39.0912 275.9264 9.2365 0.0000 59.9389 10.8723 0.0000 T 1 C1 T F 0
77 00000063 315.1973 39.2524 275.9448 9.2549 0.0000 60.1993 11.1327 0.0000 T 1 C1 T F 0
78 00000157 314.4244 38.4600 275.9644 9.2744 0.0000 58.7631 9.6965 0.0000 T 1 C1 T F 0
79 00000048 314.9524 38.9827 275.9697 9.2798 0.0000 59.9481 10.8815 0.0000 T 1 C1 T F 0
80 00000040 315.3939 39.4138 275.9801 9.2901 0.0000 60.4147 11.3481 0.0000 T 1 C1 T F 0
81 00000186 315.5018 39.5171 275.9847 9.2947 0.0000 60.3775 11.3109 0.0000 T 1 C1 T F 0
82 00000185 315.0408 38.9850 276.0558 9.3658 0.0000 59.7134 10.6468 0.0000 T 1 C1 T F 0
83 00000144 315.5666 39.4908 276.0758 9.3859 0.0000 60.6116 11.5449 0.0000 T 1 C1 T F 0
84 00000013 315.5020 39.4186 276.0835 9.3935 0.0000 60.5993 11.5327 0.0000 T 1 C1 T F 0
85 00000161 314.7627 38.6461 276.1166 9.4266 0.0000 59.2322 10.1656 0.0000 T 1 C1 T F 0
86 00000066 314.9204 38.7957 276.1248 9.4348 0.0000 59.8527 10.7861 0.0000 T 1 C1 T F 0
87 00000123 315.4201 39.2940 276.1261 9.4361 0.0000 60.3889 11.3223 0.0000 T 1 C1 T F 0
88 00000082 314.6278 38.5009 276.1269 9.4369 0.0000 58.9975 9.9309 0.0000 T 1 C1 T F 0
89 00000105 315.4413 39.3085 276.1328 9.4429 0.0000 60.3914 11.3248 0.0000 T 1 C1 T F 0
90 00000010 316.0193 39.8437 276.1756 9.4856 0.0000 60.7891 11.7225 0.0000 T 1 C1 T F 0
91 00000132 315.6333 39.4413 276.1920 9.5021 0.0000 60.6848 11.6182 0.0000 T 1 C1 T F 0
92 00000183 314.7714 38.5703 276.2010 9.5111 0.0000 59.1656 10.0990 0.0000 T 1 C1 T F 0
93 00000044 315.0157 38.7467 276.2690 9.5790 0.0000 59.6344 10.5678 0.0000 T 1 C1 T F 0
94 00000175 315.2658 38.9302 276.3355 9.6456 0.0000 59.9051 10.8385 0.0000 T 1 C1 T F 0
95 00000179 315.9074 39.5568 276.3506 9.6606 0.0000 60.7674 11.7008 0.0000 T 1 C1 T F 0
96 00000172 314.8596 38.5046 276.3550 9.6651 0.0000 59.2603 10.1936 0.0000 T 1 C1 T F 0
97 00000189 315.9156 39.5412 276.3744 9.6844 0.0000 60.7700 11.7034 0.0000 T 1 C1 T F 0
98 00000270 315.7058 39.3289 276.3769 9.6870 0.0000 60.6048 11.5382 0.0000 T 1 C1 T F 0
99 00000188 315.2973 38.9172 276.3801 9.6901 0.0000 59.9712 10.9046 0.0000 T 1 C1 T F 0
100 00000085 315.8102 39.4188 276.3914 9.7014 0.0000 60.8188 11.7522 0.0000 T 1 C1 T F 0
101 00000149 314.8763 38.4835 276.3928 9.7028 0.0000 59.2402 10.1735 0.0000 T 1 C1 T F 0
102 00000034 315.7485 39.3515 276.3969 9.7070 0.0000 60.7571 11.6905 0.0000 T 1 C1 T F 0
103 00000273 316.0426 39.5646 276.4780 9.7880 0.0000 61.0119 11.9453 0.0000 T 1 C1 T F 0
104 00000247 315.7365 39.2123 276.5243 9.8343 0.0000 60.6264 11.5598 0.0000 T 1 C1 T F 0
105 00000253 315.5787 39.0418 276.5369 9.8470 0.0000 60.4419 11.3753 0.0000 T 1 C1 T F 0
106 00000065 315.5636 39.0197 276.5439 9.8540 0.0000 60.4138 11.3472 0.0000 T 1 C1 T F 0
107 00000141 315.8826 39.2636 276.6190 9.9290 0.0000 60.6313 11.5647 0.0000 T 1 C1 T F 0
108 00000242 315.9763 39.3157 276.6606 9.9707 0.0000 60.9534 11.8868 0.0000 T 1 C1 T F 0
109 00000212 316.1941 39.5045 276.6895 9.9996 0.0000 61.0864 12.0198 0.0000 T 1 C1 T F 0
110 00000150 315.2363 38.5437 276.6926 10.0026 0.0000 59.5878 10.5211 0.0000 T 1 C1 T F 0
111 00000049 316.2519 39.5072 276.7446 10.0547 0.0000 61.0542 11.9876 0.0000 T 1 C1 T F 0
112 00000210 315.7404 38.9844 276.7561 10.0661 0.0000 60.4154 11.3488 0.0000 T 1 C1 T F 0
113 00000200 315.7497 38.9737 276.7760 10.0860 0.0000 60.3849 11.3183 0.0000 T 1 C1 T F 0
114 00000203 316.3562 39.5737 276.7825 10.0925 0.0000 61.2128 12.1462 0.0000 T 1 C1 T F 0
115 00000133 315.1803 38.3802 276.8001 10.1101 0.0000 59.5957 10.5291 0.0000 T 1 C1 T F 0
116 00000191 315.2746 38.4661 276.8085 10.1185 0.0000 59.5958 10.5292 0.0000 T 1 C1 T F 0
117 00000038 315.0235 38.2106 276.8129 10.1230 0.0000 59.3404 10.2738 0.0000 T 1 C1 T F 0
118 00000193 315.7057 38.8841 276.8216 10.1316 0.0000 60.3057 11.2391 0.0000 T 1 C1 T F 0
119 00000196 316.3441 39.5180 276.8261 10.1361 0.0000 61.1535 12.0869 0.0000 T 1 C1 T F 0
120 00000165 315.4018 38.5478 276.8540 10.1641 0.0000 59.8168 10.7502 0.0000 T 1 C1 T F 0
121 00000215 316.2748 39.4121 276.8627 10.1728 0.0000 61.2924 12.2258 0.0000 T 1 C1 T F 0
122 00000030 315.1737 38.2786 276.8951 10.2051 0.0000 59.5842 10.5176 0.0000 T 1 C1 T F 0
123 00000061 315.3569 38.4304 276.9265 10.2366 0.0000 59.7778 10.7112 0.0000 T 1 C1 T F 0
124 00000154 315.4851 38.5439 276.9412 10.2513 0.0000 59.9667 10.9000 0.0000 T 1 C1 T F 0
125 00000148 315.4528 38.4984 276.9544 10.2645 0.0000 59.7752 10.7086 0.0000 T 1 C1 T F 0
126 00000140 315.9503 38.9932 276.9571 10.2671 0.0000 60.5360 11.4694 0.0000 T 1 C1 T F 0
127 00000209 315.5136 38.5403 276.9733 10.2833 0.0000 59.9443 10.8777 0.0000 T 1 C1 T F 0
128 00000058 315.3647 38.3581 277.0066 10.3167 0.0000 59.7242 10.6576 0.0000 T 1 C1 T F 0
129 00000112 315.6165 38.4951 277.1214 10.4315 0.0000 59.9948 10.9282 0.0000 T 1 C1 T F 0
130 00000217 316.0442 38.8946 277.1496 10.4597 0.0000 60.5716 11.5050 0.0000 T 1 C1 T F 0
131 00000192 315.6700 38.5044 277.1656 10.4757 0.0000 60.0490 10.9824 0.0000 T 1 C1 T F 0
132 00000221 316.0924 38.9203 277.1721 10.4821 0.0000 60.7495 11.6828 0.0000 T 1 C1 T F 0
133 00000199 315.6675 38.4905 277.1770 10.4870 0.0000 60.0249 10.9583 0.0000 T 1 C1 T F 0
134 00000220 315.6941 38.4979 277.1962 10.5063 0.0000 60.0834 11.0168 0.0000 T 1 C1 T F 0
135 00000223 316.7693 39.5596 277.2097 10.5197 0.0000 61.6270 12.5604 0.0000 T 1 C1 T F 0
136 00000051 316.0199 38.8077 277.2122 10.5223 0.0000 60.6071 11.5405 0.0000 T 1 C1 T F 0
137 00000143 316.3017 38.9672 277.3345 10.6445 0.0000 60.9037 11.8371 0.0000 T 1 C1 T F 0
138 00000205 316.3391 38.8566 277.4824 10.7925 0.0000 60.8838 11.8171 0.0000 T 1 C1 T F 0
139 00000087 317.0901 39.5829 277.5072 10.8173 0.0000 62.0706 13.0040 0.0000 T 1 C1 T F 0
140 00000184 316.1373 38.5871 277.5502 10.8603 0.0000 60.5760 11.5094 0.0000 T 1 C1 T F 0
141 00000011 317.2880 39.6719 277.6161 10.9262 0.0000 62.3658 13.2992 0.0000 T 1 C1 T F 0
142 00000171 316.5894 38.9502 277.6392 10.9492 0.0000 61.2548 12.1882 0.0000 T 1 C1 T F 0
143 00000029 316.5500 38.8880 277.6620 10.9720 0.0000 61.0980 12.0314 0.0000 T 1 C1 T F 0
144 00000226 317.3954 39.6707 277.7247 11.0348 0.0000 62.1462 13.0796 0.0000 T 1 C1 T F 0
145 00000225 316.6284 38.8790 277.7494 11.0594 0.0000 61.1984 12.1318 0.0000 T 1 C1 T F 0
146 00000103 317.1410 39.3793 277.7617 11.0717 0.0000 61.9815 12.9149 0.0000 T 1 C1 T F 0
147 00000250 317.1312 39.3183 277.8129 11.1230 0.0000 61.9608 12.8942 0.0000 T 1 C1 T F 0
148 00000146 316.4037 38.5728 277.8309 11.1410 0.0000 60.8198 11.7532 0.0000 T 1 C1 T F 0
149 00000124 317.5895 39.7238 277.8657 11.1757 0.0000 62.6433 13.5766 0.0000 T 1 C1 T F 0
150 00000294 317.1340 39.2621 277.8719 11.1820 0.0000 61.9319 12.8653 0.0000 T 1 C1 T F 0
151 00000326 316.8935 39.0029 277.8906 11.2006 0.0000 61.7473 12.6807 0.0000 T 1 C1 T F 0
152 00000096 317.4965 39.5905 277.9060 11.2160 0.0000 62.4911 13.4245 0.0000 T 1 C1 T F 0
153 00000243 316.8614 38.8823 277.9792 11.2892 0.0000 61.4414 12.3748 0.0000 T 1 C1 T F 0
154 00000081 317.5167 39.5124 278.0043 11.3143 0.0000 62.4674 13.4008 0.0000 T 1 C1 T F 0
155 00000244 317.8216 39.7540 278.0676 11.3777 0.0000 62.5518 13.4851 0.0000 T 1 C1 T F 0
156 00000268 316.8389 38.7332 278.1057 11.4157 0.0000 61.2204 12.1537 0.0000 T 1 C1 T F 0
157 00000239 317.0300 38.8356 278.1944 11.5044 0.0000 61.5552 12.4886 0.0000 T 1 C1 T F 0
158 00000228 317.0798 38.7908 278.2890 11.5990 0.0000 61.6888 12.6222 0.0000 T 1 C1 T F 0
159 00000135 317.9402 39.6466 278.2936 11.6036 0.0000 62.9318 13.8652 0.0000 T 1 C1 T F 0
160 00000031 316.7281 38.4252 278.3029 11.6129 0.0000 61.1872 12.1206 0.0000 T 1 C1 T F 0
161 00000266 317.2183 38.8781 278.3402 11.6503 0.0000 61.7513 12.6847 0.0000 T 1 C1 T F 0
162 00000102 318.0802 39.7011 278.3791 11.6891 0.0000 63.1447 14.0780 0.0000 T 1 C1 T F 0
163 00000024 317.2483 38.8326 278.4157 11.7257 0.0000 61.5966 12.5300 0.0000 T 1 C1 T F 0
164 00000180 317.4211 38.9695 278.4516 11.7617 0.0000 62.0947 13.0281 0.0000 T 1 C1 T F 0
165 00000187 317.5466 38.9973 278.5494 11.8594 0.0000 62.2515 13.1849 0.0000 T 1 C1 T F 0
166 00000257 317.9957 39.3427 278.6531 11.9631 0.0000 62.7667 13.7001 0.0000 T 1 C1 T F 0
167 00000298 318.2674 39.5911 278.6763 11.9863 0.0000 63.0495 13.9829 0.0000 T 1 C1 T F 0
168 00000136 317.7010 39.0192 278.6818 11.9918 0.0000 62.7998 13.7332 0.0000 T 1 C1 T F 0
169 00000271 317.5205 38.8145 278.7061 12.0161 0.0000 62.1584 13.0918 0.0000 T 1 C1 T F 0
170 00000092 317.8549 39.1104 278.7445 12.0545 0.0000 62.8191 13.7525 0.0000 T 1 C1 T F 0
171 00000119 318.6092 39.8400 278.7692 12.0792 0.0000 63.6882 14.6216 0.0000 T 1 C1 T F 0
172 00000023 317.5393 38.7612 278.7781 12.0882 0.0000 61.9421 12.8755 0.0000 T 1 C1 T F 0
173 00000164 317.9317 39.1515 278.7802 12.0903 0.0000 62.6301 13.5635 0.0000 T 1 C1 T F 0
174 00000109 318.3925 39.5517 278.8408 12.1508 0.0000 63.4226 14.3559 0.0000 T 1 C1 T F 0
175 00000315 317.6404 38.7761 278.8643 12.1743 0.0000 62.0599 12.9933 0.0000 T 1 C1 T F 0
176 00000118 318.6580 39.7319 278.9261 12.2361 0.0000 63.7439 14.6773 0.0000 T 1 C1 T F 0
177 00000127 318.5703 39.6415 278.9288 12.2388 0.0000 63.5814 14.5148 0.0000 T 1 C1 T F 0
178 00000158 317.8957 38.9395 278.9562 12.2663 0.0000 62.4417 13.3751 0.0000 T 1 C1 T F 0
179 00000204 318.0232 39.0593 278.9640 12.2740 0.0000 62.7014 13.6348 0.0000 T 1 C1 T F 0
180 00000278 317.8581 38.8330 279.0251 12.3351 0.0000 62.5025 13.4359 0.0000 T 1 C1 T F 0
181 00000116 318.6474 39.6169 279.0304 12.3405 0.0000 63.7263 14.6596 0.0000 T 1 C1 T F 0
182 00000287 317.9033 38.7845 279.1188 12.4288 0.0000 62.4746 13.4080 0.0000 T 1 C1 T F 0
183 00000097 318.2219 39.1002 279.1217 12.4317 0.0000 63.2032 14.1366 0.0000 T 1 C1 T F 0
184 00000236 318.8076 39.6838 279.1238 12.4339 0.0000 63.8779 14.8113 0.0000 T 1 C1 T F 0
185 00000198 318.0247 38.9004 279.1243 12.4344 0.0000 62.6022 13.5356 0.0000 T 1 C1 T F 0
186 00000130 318.6769 39.5422 279.1347 12.4447 0.0000 63.6977 14.6311 0.0000 T 1 C1 T F 0
187 00000213 318.1609 39.0172 279.1437 12.4537 0.0000 62.8701 13.8035 0.0000 T 1 C1 T F 0
188 00000258 318.8266 39.6720 279.1546 12.4646 0.0000 63.8634 14.7968 0.0000 T 1 C1 T F 0
189 00000197 318.1441 38.9694 279.1747 12.4848 0.0000 62.7789 13.7122 0.0000 T 1 C1 T F 0
190 00000009 317.6628 38.4825 279.1802 12.4903 0.0000 61.8788 12.8122 0.0000 T 1 C1 T F 0
191 00000289 318.0193 38.8048 279.2145 12.5246 0.0000 62.6087 13.5421 0.0000 T 1 C1 T F 0
192 00000047 317.5262 38.3007 279.2255 12.5355 0.0000 62.2931 13.2264 0.0000 T 1 C1 T F 0
193 00000260 318.8131 39.5807 279.2324 12.5425 0.0000 63.7993 14.7327 0.0000 T 1 C1 T F 0
194 00000241 318.8316 39.5975 279.2341 12.5441 0.0000 63.8558 14.7892 0.0000 T 1 C1 T F 0
195 00000067 317.7281 38.4882 279.2398 12.5499 0.0000 62.4702 13.4036 0.0000 T 1 C1 T F 0
196 00000134 318.9452 39.7011 279.2441 12.5542 0.0000 63.9922 14.9256 0.0000 T 1 C1 T F 0
197 00000264 318.8472 39.6026 279.2446 12.5546 0.0000 63.8522 14.7856 0.0000 T 1 C1 T F 0
198 00000059 317.6568 38.4040 279.2528 12.5629 0.0000 62.1044 13.0378 0.0000 T 1 C1 T F 0
199 00000190 318.3977 39.1127 279.2850 12.5951 0.0000 63.0381 13.9715 0.0000 T 1 C1 T F 0
200 00000208 318.1023 38.8126 279.2897 12.5998 0.0000 62.6372 13.5705 0.0000 T 1 C1 T F 0
201 00000233 318.9447 39.6341 279.3106 12.6207 0.0000 63.9411 14.8745 0.0000 T 1 C1 T F 0
202 00000283 318.2582 38.9390 279.3193 12.6293 0.0000 62.8940 13.8274 0.0000 T 1 C1 T F 0
203 00000237 318.8642 39.5368 279.3274 12.6375 0.0000 63.8224 14.7558 0.0000 T 1 C1 T F 0
204 00000230 318.7669 39.3823 279.3846 12.6946 0.0000 63.3627 14.2961 0.0000 T 1 C1 T F 0
205 00000206 318.5443 39.1556 279.3888 12.6988 0.0000 63.6306 14.5639 0.0000 T 1 C1 T F 0
206 00000292 318.2973 38.8642 279.4331 12.7432 0.0000 62.8488 13.7821 0.0000 T 1 C1 T F 0
207 00000265 318.9932 39.5567 279.4365 12.7466 0.0000 63.9413 14.8747 0.0000 T 1 C1 T F 0
208 00000261 318.4950 39.0572 279.4378 12.7479 0.0000 63.5485 14.4819 0.0000 T 1 C1 T F 0
209 00000128 318.4959 39.0549 279.4410 12.7511 0.0000 63.6197 14.5531 0.0000 T 1 C1 T F 0
210 00000248 318.5389 39.0225 279.5164 12.8264 0.0000 63.5980 14.5314 0.0000 T 1 C1 T F 0
211 00000304 318.3842 38.8531 279.5311 12.8412 0.0000 63.0443 13.9777 0.0000 T 1 C1 T F 0
212 00000255 319.3410 39.6884 279.6525 12.9626 0.0000 64.4128 15.3462 0.0000 T 1 C1 T F 0
213 00000219 318.5850 38.9100 279.6750 12.9851 0.0000 63.1811 14.1145 0.0000 T 1 C1 T F 0
214 00000078 319.3638 39.6623 279.7015 13.0115 0.0000 64.3551 15.2885 0.0000 T 1 C1 T F 0
215 00000251 319.1040 39.3787 279.7253 13.0353 0.0000 63.7998 14.7332 0.0000 T 1 C1 T F 0
216 00000099 319.6602 39.9081 279.7521 13.0621 0.0000 64.6877 15.6211 0.0000 T 1 C1 T F 0
217 00000224 318.8685 39.0971 279.7714 13.0815 0.0000 63.4990 14.4324 0.0000 T 1 C1 T F 0
218 00000088 318.6743 38.8810 279.7933 13.1034 0.0000 63.5744 14.5077 0.0000 T 1 C1 T F 0
219 00000227 318.6690 38.8447 279.8242 13.1343 0.0000 63.2331 14.1665 0.0000 T 1 C1 T F 0
220 00000131 319.0372 39.1638 279.8734 13.1835 0.0000 64.1500 15.0834 0.0000 T 1 C1 T F 0
221 00000276 319.2986 39.4069 279.8917 13.2017 0.0000 63.9292 14.8625 0.0000 T 1 C1 T F 0
222 00000293 319.6151 39.6882 279.9269 13.2369 0.0000 64.6578 15.5912 0.0000 T 1 C1 T F 0
223 00000120 319.6075 39.6553 279.9522 13.2622 0.0000 64.6689 15.6023 0.0000 T 1 C1 T F 0
224 00000153 318.9869 38.9887 279.9982 13.3082 0.0000 63.5047 14.4381 0.0000 T 1 C1 T F 0
225 00000290 319.3932 39.3183 280.0749 13.3849 0.0000 63.9914 14.9247 0.0000 T 1 C1 T F 0
226 00000310 319.1157 38.9564 280.1594 13.4694 0.0000 63.6994 14.6328 0.0000 T 1 C1 T F 0
227 00000106 319.0772 38.8430 280.2341 13.5442 0.0000 64.0099 14.9433 0.0000 T 1 C1 T F 0
228 00000249 319.1193 38.8419 280.2775 13.5875 0.0000 63.6358 14.5692 0.0000 T 1 C1 T F 0
229 00000267 319.1456 38.8637 280.2819 13.5919 0.0000 63.6678 14.6012 0.0000 T 1 C1 T F 0
230 00000245 319.2677 38.9545 280.3131 13.6232 0.0000 63.7668 14.7002 0.0000 T 1 C1 T F 0
231 00000054 318.9359 38.5582 280.3777 13.6878 0.0000 63.4232 14.3566 0.0000 T 1 C1 T F 0
232 00000176 319.7973 39.3317 280.4657 13.7757 0.0000 64.8178 15.7512 0.0000 T 1 C1 T F 0
233 00000194 319.6356 39.1115 280.5242 13.8342 0.0000 64.6008 15.5342 0.0000 T 1 C1 T F 0
234 00000121 319.6688 39.1367 280.5322 13.8422 0.0000 64.7197 15.6531 0.0000 T 1 C1 T F 0
235 00000280 319.9474 39.4108 280.5367 13.8467 0.0000 64.9652 15.8986 0.0000 T 1 C1 T F 0
236 00000062 318.7703 38.2040 280.5663 13.8764 0.0000 63.0116 13.9450 0.0000 T 1 C1 T F 0
237 00000122 319.7097 39.1080 280.6017 13.9117 0.0000 64.7134 15.6468 0.0000 T 1 C1 T F 0
238 00000282 320.4520 39.7880 280.6641 13.9741 0.0000 65.3431 16.2765 0.0000 T 1 C1 T F 0
239 00000111 319.9957 39.2964 280.6993 14.0093 0.0000 65.0330 15.9664 0.0000 T 1 C1 T F 0
240 00000003 319.7294 39.0056 280.7239 14.0339 0.0000 64.6846 15.6180 0.0000 T 1 C1 T F 0
241 00000001 319.7229 38.9128 280.8101 14.1202 0.0000 64.5771 15.5105 0.0000 T 1 C1 T F 0
242 00000316 320.0649 39.1123 280.9526 14.2627 0.0000 65.0989 16.0323 0.0000 T 1 C1 T F 0
243 00000145 320.0165 38.9614 281.0551 14.3651 0.0000 64.9002 15.8336 0.0000 T 1 C1 T F 0
244 00000004 319.9552 38.8411 281.1141 14.4241 0.0000 64.8091 15.7425 0.0000 T 1 C1 T F 0
245 00000218 320.3288 39.1933 281.1354 14.4455 0.0000 65.4180 16.3514 0.0000 T 1 C1 T F 0
246 00000202 320.7681 39.4666 281.3016 14.6116 0.0000 65.7312 16.6646 0.0000 T 1 C1 T F 0
247 00000056 320.1552 38.8184 281.3368 14.6468 0.0000 65.0264 15.9598 0.0000 T 1 C1 T F 0
248 00000259 320.4771 39.0426 281.4345 14.7445 0.0000 65.3768 16.3102 0.0000 T 1 C1 T F 0
249 00000178 320.5002 38.9774 281.5228 14.8328 0.0000 65.5007 16.4341 0.0000 T 1 C1 T F 0
250 00000211 320.7061 39.1786 281.5275 14.8375 0.0000 65.7311 16.6644 0.0000 T 1 C1 T F 0
251 00000284 320.5074 38.9545 281.5529 14.8630 0.0000 65.4526 16.3860 0.0000 T 1 C1 T F 0
252 00000263 320.3645 38.8055 281.5590 14.8690 0.0000 64.8931 15.8265 0.0000 T 1 C1 T F 0
253 00000320 320.6851 39.1035 281.5816 14.8917 0.0000 65.6757 16.6091 0.0000 T 1 C1 T F 0
254 00000169 320.3091 38.7240 281.5850 14.8951 0.0000 65.1463 16.0797 0.0000 T 1 C1 T F 0
255 00000325 320.3058 38.6884 281.6174 14.9274 0.0000 65.1490 16.0824 0.0000 T 1 C1 T F 0
256 00000098 320.2370 38.5802 281.6568 14.9669 0.0000 64.7174 15.6508 0.0000 T 1 C1 T F 0
257 00000246 320.5842 38.9230 281.6612 14.9713 0.0000 65.0500 15.9833 0.0000 T 1 C1 T F 0
258 00000006 320.6949 38.9946 281.7003 15.0104 0.0000 65.5138 16.4472 0.0000 T 1 C1 T F 0
259 00000303 320.9993 39.2927 281.7065 15.0166 0.0000 65.6099 16.5432 0.0000 T 1 C1 T F 0
260 00000313 320.9383 39.1964 281.7419 15.0520 0.0000 65.9681 16.9015 0.0000 T 1 C1 T F 0
261 00000195 320.8130 39.0519 281.7611 15.0712 0.0000 65.7626 16.6960 0.0000 T 1 C1 T F 0
262 00000152 321.0132 39.2477 281.7656 15.0756 0.0000 65.8944 16.8278 0.0000 T 1 C1 T F 0
263 00000285 320.8451 39.0655 281.7795 15.0896 0.0000 65.4046 16.3380 0.0000 T 1 C1 T F 0
264 00000297 320.9571 39.0596 281.8975 15.2076 0.0000 65.7911 16.7245 0.0000 T 1 C1 T F 0
265 00000269 320.9587 38.9892 281.9695 15.2796 0.0000 65.4401 16.3735 0.0000 T 1 C1 T F 0
266 00000222 321.0095 39.0053 282.0042 15.3142 0.0000 65.9113 16.8447 0.0000 T 1 C1 T F 0
267 00000110 320.8708 38.8273 282.0436 15.3536 0.0000 65.7267 16.6601 0.0000 T 1 C1 T F 0
268 00000076 320.8475 38.7249 282.1226 15.4326 0.0000 65.2914 16.2248 0.0000 T 1 C1 T F 0
269 00000007 321.1011 38.8449 282.2562 15.5663 0.0000 65.9161 16.8495 0.0000 T 1 C1 T F 0
270 00000207 321.4301 39.0284 282.4017 15.7117 0.0000 66.3081 17.2415 0.0000 T 1 C1 T F 0
271 00000256 321.2366 38.8346 282.4020 15.7121 0.0000 66.0377 16.9711 0.0000 T 1 C1 T F 0
272 00000216 321.2933 38.8467 282.4466 15.7567 0.0000 66.1809 17.1143 0.0000 T 1 C1 T F 0
273 00000005 321.4884 39.0364 282.4520 15.7621 0.0000 66.2882 17.2216 0.0000 T 1 C1 T F 0
274 00000075 321.7497 39.2573 282.4924 15.8024 0.0000 66.3801 17.3135 0.0000 T 1 C1 T F 0
275 00000036 320.9162 38.3872 282.5289 15.8390 0.0000 65.0565 15.9899 0.0000 T 1 C1 T F 0
276 00000318 321.8382 39.3027 282.5354 15.8455 0.0000 66.6725 17.6058 0.0000 T 1 C1 T F 0
277 00000232 321.9689 39.2583 282.7106 16.0207 0.0000 66.8089 17.7423 0.0000 T 1 C1 T F 0
278 00000238 321.7456 38.9042 282.8414 16.1515 0.0000 66.5126 17.4460 0.0000 T 1 C1 T F 0
279 00000046 322.2030 39.3358 282.8672 16.1773 0.0000 66.7243 17.6577 0.0000 T 1 C1 T F 0
280 00000319 321.7901 38.8924 282.8977 16.2078 0.0000 66.5564 17.4898 0.0000 T 1 C1 T F 0
281 00000317 322.1177 39.2107 282.9070 16.2171 0.0000 66.6652 17.5986 0.0000 T 1 C1 T F 0
282 00000272 321.7887 38.8264 282.9624 16.2724 0.0000 66.6968 17.6302 0.0000 T 1 C1 T F 0
283 00000322 322.1470 39.1364 283.0106 16.3206 0.0000 66.9888 17.9222 0.0000 T 1 C1 T F 0
284 00000327 322.2151 39.1009 283.1142 16.4243 0.0000 67.0176 17.9510 0.0000 T 1 C1 T F 0
285 00000182 321.8834 38.7145 283.1688 16.4789 0.0000 66.7212 17.6545 0.0000 T 1 C1 T F 0
286 00000045 322.4856 39.3140 283.1716 16.4816 0.0000 67.0556 17.9890 0.0000 T 1 C1 T F 0
287 00000177 322.0003 38.8037 283.1965 16.5066 0.0000 66.8958 17.8291 0.0000 T 1 C1 T F 0
288 00000181 322.1543 38.8665 283.2878 16.5978 0.0000 67.0346 17.9680 0.0000 T 1 C1 T F 0
289 00000286 322.1887 38.8412 283.3474 16.6575 0.0000 67.0059 17.9393 0.0000 T 1 C1 T F 0
290 00000201 322.2103 38.8533 283.3571 16.6671 0.0000 67.0760 18.0094 0.0000 T 1 C1 T F 0
291 00000332 322.6806 39.2831 283.3975 16.7075 0.0000 67.5899 18.5233 0.0000 T 1 C1 T F 0
292 00000324 322.7933 39.3460 283.4474 16.7574 0.0000 67.6687 18.6021 0.0000 T 1 C1 T F 0
293 00000330 322.7328 39.2563 283.4765 16.7865 0.0000 67.5459 18.4793 0.0000 T 1 C1 T F 0
294 00000002 322.4452 38.9388 283.5064 16.8164 0.0000 67.3372 18.2706 0.0000 T 1 C1 T F 0
295 00000321 322.8597 39.3083 283.5515 16.8615 0.0000 67.4457 18.3791 0.0000 T 1 C1 T F 0
296 00000277 322.4131 38.8614 283.5517 16.8617 0.0000 67.2993 18.2326 0.0000 T 1 C1 T F 0
297 00000329 322.4661 38.9077 283.5584 16.8684 0.0000 67.2642 18.1976 0.0000 T 1 C1 T F 0
298 00000254 322.2903 38.6981 283.5922 16.9023 0.0000 67.2459 18.1793 0.0000 T 1 C1 T F 0
299 00000333 322.6237 39.0234 283.6002 16.9103 0.0000 67.3867 18.3201 0.0000 T 1 C1 T F 0
300 00000338 322.6251 38.9676 283.6575 16.9676 0.0000 67.4561 18.3895 0.0000 T 1 C1 T F 0
301 00000337 322.9118 39.1762 283.7356 17.0456 0.0000 67.7913 18.7247 0.0000 T 1 C1 T F 0
302 00000291 322.5848 38.8463 283.7384 17.0485 0.0000 67.4047 18.3381 0.0000 T 1 C1 T F 0
303 00000077 322.5242 38.7585 283.7658 17.0758 0.0000 67.0214 17.9548 0.0000 T 1 C1 T F 0
304 00000323 322.8630 39.0840 283.7790 17.0890 0.0000 67.6612 18.5946 0.0000 T 1 C1 T F 0
305 00000334 323.0923 39.2814 283.8109 17.1210 0.0000 67.9299 18.8633 0.0000 T 1 C1 T F 0
306 00000307 322.7603 38.9405 283.8197 17.1298 0.0000 67.6070 18.5404 0.0000 T 1 C1 T F 0
307 00000229 322.8788 39.0354 283.8434 17.1534 0.0000 67.7042 18.6376 0.0000 T 1 C1 T F 0
308 00000349 323.3373 39.4603 283.8770 17.1870 0.0000 67.8328 18.7662 0.0000 T 1 C1 T F 0
309 00000275 322.6226 38.7257 283.8969 17.2070 0.0000 67.5981 18.5315 0.0000 T 1 C1 T F 0
310 00000335 323.1930 39.2764 283.9166 17.2267 0.0000 68.0185 18.9519 0.0000 T 1 C1 T F 0
311 00000341 323.1353 39.1935 283.9418 17.2518 0.0000 67.9502 18.8836 0.0000 T 1 C1 T F 0
312 00000288 322.8264 38.8801 283.9463 17.2563 0.0000 67.6164 18.5498 0.0000 T 1 C1 T F 0
313 00000336 322.9241 38.9397 283.9844 17.2944 0.0000 67.7027 18.6360 0.0000 T 1 C1 T F 0
314 00000331 323.0677 39.0390 284.0287 17.3388 0.0000 67.8371 18.7704 0.0000 T 1 C1 T F 0
315 00000328 322.9855 38.9511 284.0344 17.3445 0.0000 67.7160 18.6494 0.0000 T 1 C1 T F 0
316 00000342 323.1184 39.0277 284.0907 17.4008 0.0000 67.9063 18.8397 0.0000 T 1 C1 T F 0
317 00000301 322.8326 38.6819 284.1507 17.4608 0.0000 67.7121 18.6455 0.0000 T 1 C1 T F 0
318 00000344 323.3973 39.2236 284.1737 17.4838 0.0000 68.1740 19.1074 0.0000 T 1 C1 T F 0
319 00000339 323.5751 39.3984 284.1767 17.4868 0.0000 68.4223 19.3557 0.0000 T 1 C1 T F 0
320 00000305 322.7143 38.5332 284.1811 17.4911 0.0000 67.5100 18.4434 0.0000 T 1 C1 T F 0
321 00000351 322.9710 38.7681 284.2029 17.5130 0.0000 67.8893 18.8227 0.0000 T 1 C1 T F 0
322 00000299 322.8938 38.6816 284.2122 17.5222 0.0000 67.7973 18.7307 0.0000 T 1 C1 T F 0
323 00000350 323.0178 38.7546 284.2632 17.5732 0.0000 67.9605 18.8939 0.0000 T 1 C1 T F 0
324 00000234 322.8150 38.5501 284.2649 17.5750 0.0000 67.5895 18.5229 0.0000 T 1 C1 T F 0
325 00000343 323.5486 39.2241 284.3245 17.6346 0.0000 68.4158 19.3491 0.0000 T 1 C1 T F 0
326 00000139 322.8954 38.5556 284.3398 17.6499 0.0000 67.7171 18.6505 0.0000 T 1 C1 T F 0
327 00000340 323.4531 39.0485 284.4047 17.7147 0.0000 68.2637 19.1971 0.0000 T 1 C1 T F 0
328 00000142 323.0611 38.5761 284.4850 17.7950 0.0000 67.9074 18.8408 0.0000 T 1 C1 T F 0
329 00000345 323.8575 39.1838 284.6737 17.9838 0.0000 68.6191 19.5525 0.0000 T 1 C1 T F 0
330 00000348 323.8698 39.1815 284.6882 17.9983 0.0000 68.6632 19.5966 0.0000 T 1 C1 T F 0
331 00000346 323.9910 39.1749 284.8161 18.1262 0.0000 68.7505 19.6839 0.0000 T 1 C1 T F 0
332 00000347 323.9732 39.0854 284.8878 18.1979 0.0000 68.7519 19.6852 0.0000 T 1 C1 T F 0
333 00000314 323.7036 38.5285 285.1751 18.4851 0.0000 68.4591 19.3925 0.0000 T 1 C1 T F 0
334 00000308 324.0049 38.5986 285.4062 18.7163 0.0000 68.8014 19.7348 0.0000 T 1 C1 T F 0
335 00000214 324.7059 39.2032 285.5027 18.8128 0.0000 69.3765 20.3099 0.0000 T 1 C1 F F 0
336 00000240 325.0460 39.4348 285.6112 18.9213 0.0000 69.7843 20.7177 0.0000 T 1 C1 F F 0
337 00000274 324.8733 39.1318 285.7415 19.0516 0.0000 69.5366 20.4700 0.0000 T 1 C1 F F 0
338 00000252 325.1739 39.3140 285.8599 19.1699 0.0000 69.7726 20.7060 0.0000 T 1 C1 F F 0
339 00000352 325.3516 39.3404 286.0112 19.3213 0.0000 70.0763 21.0097 0.0000 T 1 C1 F F 0
340 00000262 325.5528 39.2447 286.3082 19.6182 0.0000 70.2673 21.2007 0.0000 T 1 C1 F F 0
341 00000300 325.5649 39.1892 286.3757 19.6857 0.0000 70.2485 21.1819 0.0000 T 1 C1 F F 0
342 00000235 325.7690 39.3220 286.4470 19.7570 0.0000 70.4524 21.3858 0.0000 T 1 C1 F F 0
343 00000295 325.7635 39.1838 286.5797 19.8897 0.0000 70.3954 21.3288 0.0000 T 1 C1 F F 0
344 00000302 325.8293 39.2354 286.5939 19.9039 0.0000 70.4801 21.4135 0.0000 T 1 C1 F F 0
345 00000296 325.8210 39.1848 286.6362 19.9462 0.0000 70.4832 21.4166 0.0000 T 1 C1 F F 0
346 00000309 326.1770 39.4300 286.7470 20.0571 0.0000 70.8447 21.7780 0.0000 T 1 C1 F F 0
347 00000306 326.0690 39.2469 286.8221 20.1321 0.0000 70.6514 21.5848 0.0000 T 1 C1 F F 0
348 00000231 325.6507 38.7615 286.8892 20.1992 0.0000 70.2088 21.1422 0.0000 T 1 C1 F F 0
349 00000311 326.1110 39.1215 286.9895 20.2996 0.0000 70.7176 21.6510 0.0000 T 1 C1 F F 0
350 00000312 326.1709 39.1170 287.0540 20.3640 0.0000 70.8045 21.7379 0.0000 T 1 C1 F F 0
351 00000281 326.4360 39.0052 287.4308 20.7409 0.0000 71.0368 21.9702 0.0000 T 1 C1 F F 0
352 00000279 326.2541 38.7959 287.4582 20.7682 0.0000 70.8237 21.7571 0.0000 T 1 C1 F F 0
----------------------------------------------------------------------------------------------------------------------------------------
========================================================================================================================================
