# Supplementary material for: Sesquiterpenes From Oplopanax elatus Stems and Their Anti-Photoaging Effects by Down-Regulating Matrix Metalloproteinase-1 Expression via Anti-Inflammation
Source: Front Chem. 2021 Nov 4;9:766041. doi: 10.3389/fchem.2021.766041 (PMC8600134; doi:10.3389/fchem.2021.766041)
Supplement: Supplementary file 9 [file Table8.XLS]

## Sheet: 4-CONF_1_ecd
Entering Gaussian System, Link 0=g16
Input=CONF_1_ecd.com
Output=CONF_1_ecd.log
Initial command:
/public/apps/g16/l1.exe "scr.146.master/Gau-116126.inp" -scrdir="scr.146.master/"
Default is to use a total of 12 processors:
12 via shared-memory
1 via Linda
Entering Link 1 = /public/apps/g16/l1.exe PID= 116127.
Copyright (c) 1988-2019, Gaussian, Inc. All Rights Reserved.
This is part of the Gaussian(R) 16 program. It is based on
the Gaussian(R) 09 system (copyright 2009, Gaussian, Inc.),
the Gaussian(R) 03 system (copyright 2003, Gaussian, Inc.),
the Gaussian(R) 98 system (copyright 1998, Gaussian, Inc.),
the Gaussian(R) 94 system (copyright 1995, Gaussian, Inc.),
the Gaussian 92(TM) system (copyright 1992, Gaussian, Inc.),
the Gaussian 90(TM) system (copyright 1990, Gaussian, Inc.),
the Gaussian 88(TM) system (copyright 1988, Gaussian, Inc.),
the Gaussian 86(TM) system (copyright 1986, Carnegie Mellon
University), and the Gaussian 82(TM) system (copyright 1983,
Carnegie Mellon University). Gaussian is a federally registered
trademark of Gaussian, Inc.
This software contains proprietary and confidential information,
including trade secrets, belonging to Gaussian, Inc.
This software is provided under written license and may be
used, copied, transmitted, or stored only in accord with that
written license.
The following legend is applicable only to US Government
contracts under FAR:
RESTRICTED RIGHTS LEGEND
Use, reproduction and disclosure by the US Government is
subject to restrictions as set forth in subparagraphs (a)
and (c) of the Commercial Computer Software - Restricted
Rights clause in FAR 52.227-19.
Gaussian, Inc.
340 Quinnipiac St., Bldg. 40, Wallingford CT 06492
---------------------------------------------------------------
Warning -- This program may not be used in any manner that
competes with the business of Gaussian, Inc. or will provide
assistance to any competitor of Gaussian, Inc. The licensee
of this program is prohibited from giving any competitor of
Gaussian, Inc. access to this program. By using this program,
the user acknowledges that Gaussian, Inc. is engaged in the
business of creating and licensing software in the field of
computational chemistry and represents and warrants to the
licensee that it is not a competitor of Gaussian, Inc. and that
it will not use this program in any manner prohibited above.
---------------------------------------------------------------
Cite this work as:
Gaussian 16, Revision C.01,
M. J. Frisch, G. W. Trucks, H. B. Schlegel, G. E. Scuseria,
M. A. Robb, J. R. Cheeseman, G. Scalmani, V. Barone,
G. A. Petersson, H. Nakatsuji, X. Li, M. Caricato, A. V. Marenich,
J. Bloino, B. G. Janesko, R. Gomperts, B. Mennucci, H. P. Hratchian,
J. V. Ortiz, A. F. Izmaylov, J. L. Sonnenberg, D. Williams-Young,
F. Ding, F. Lipparini, F. Egidi, J. Goings, B. Peng, A. Petrone,
T. Henderson, D. Ranasinghe, V. G. Zakrzewski, J. Gao, N. Rega,
G. Zheng, W. Liang, M. Hada, M. Ehara, K. Toyota, R. Fukuda,
J. Hasegawa, M. Ishida, T. Nakajima, Y. Honda, O. Kitao, H. Nakai,
T. Vreven, K. Throssell, J. A. Montgomery, Jr., J. E. Peralta,
F. Ogliaro, M. J. Bearpark, J. J. Heyd, E. N. Brothers, K. N. Kudin,
V. N. Staroverov, T. A. Keith, R. Kobayashi, J. Normand,
K. Raghavachari, A. P. Rendell, J. C. Burant, S. S. Iyengar,
J. Tomasi, M. Cossi, J. M. Millam, M. Klene, C. Adamo, R. Cammi,
J. W. Ochterski, R. L. Martin, K. Morokuma, O. Farkas,
J. B. Foresman, and D. J. Fox, Gaussian, Inc., Wallingford CT, 2019.
******************************************
Gaussian 16: ES64L-G16RevC.01 3-Jul-2019
20-May-2020
******************************************
%oldchk=CONF_1_min.chk
%chk=CONF_1_ecd.chk
Copying data from "CONF_1_min.chk" to current chk file "CONF_1_ecd.chk"
IOpt= 2 FromEx=T IUOpen= 4 IOptOp= 5 NList= 0 IFRang= 0 IUIn= 4 IUOut= 2.
----------------------------------------------------------------------
#P td=(nstates=100) APFD/6-311+g(2d,p) guess=read geom=allcheck integr
al(ultrafinegrid) scrf=check
----------------------------------------------------------------------
1/29=7,38=1,40=1,172=1/1;
2/12=2,40=1/2;
3/5=4,6=6,7=112,11=9,14=-4,25=1,30=1,70=2,74=-44,75=-5,116=-2/1,2,3,8;
4/5=1/1;
5/5=2,38=6/2;
8/6=1,10=2,108=100/1;
9/41=100,42=1,70=2/14;
6/7=2,8=2,9=2,10=2/1;
99/5=1,9=1/99;
Leave Link 1 at Wed May 20 10:15:01 2020, MaxMem= 3221225472 cpu: 1.3 elap: 0.1
(Enter /public/apps/g16/l101.exe)
Structure from the checkpoint file: "CONF_1_ecd.chk"
-----
*****
-----
Charge = 0 Multiplicity = 1
Redundant internal coordinates found in file. (old form).
C,0,3.4225344096,-0.134315829,-0.2653101858
C,0,2.9595606192,1.2853953794,-0.5640378173
C,0,1.5981962038,1.6333942641,0.0338439916
C,0,0.590488454,0.5335979511,-0.3586349333
C,0,1.0229941083,-0.9110176426,-0.0110907908
C,0,2.3817625445,-1.164560817,-0.684442345
C,0,-0.8182146317,0.7922731611,0.1036211897
C,0,-1.7388305235,-0.162900374,0.2683222931
C,0,-1.4159755277,-1.6108285862,0.0244120664
C,0,-0.0487948852,-1.8227226591,-0.6229527487
C,0,-3.1517427209,0.1951343149,0.6555190052
C,0,-3.742109241,-0.7117616131,1.732594347
O,0,1.781888448,1.7147995599,1.4553833608
C,0,1.1634108858,2.9992316626,-0.4993144137
O,0,2.8590111217,-2.4963936229,-0.4798823565
C,0,-4.0441562989,0.1703067464,-0.5899357785
C,0,1.1105136814,-1.1937300814,1.4944554599
O,0,-3.5911213937,1.0574048648,-1.6048044669
H,0,4.3580420671,-0.3413127761,-0.7946251824
H,0,3.634507433,-0.2450200228,0.803708524
H,0,3.6948654457,2.0120459657,-0.2033748197
H,0,2.886828435,1.4225338121,-1.6485583265
H,0,0.5800471506,0.5816316095,-1.4589109203
H,0,2.2330268501,-1.093407691,-1.7691182447
H,0,-1.106924723,1.8228022008,0.2984395883
H,0,-1.4677415783,-2.1416295827,0.9837655177
H,0,-2.1983964851,-2.0663694871,-0.5934454281
H,0,0.2534995123,-2.8687931223,-0.5195419068
H,0,-0.1141482774,-1.6139417888,-1.6977531545
H,0,-3.1473506322,1.227945316,1.0250451768
H,0,-4.7337631712,-0.3581854874,2.0276529116
H,0,-3.1082991948,-0.7279550159,2.6228844603
H,0,-3.8480157349,-1.7401254084,1.3766052137
H,0,0.9094617949,1.7622678371,1.8630866734
H,0,0.2611827348,3.3590122106,0.0001984869
H,0,1.9576656697,3.7290174873,-0.3214817049
H,0,0.9665738978,2.95671333,-1.5735965008
H,0,3.121005744,-2.5789171888,0.4440895511
H,0,-4.1087786766,-0.854127704,-0.980995324
H,0,-5.0552874727,0.4894425664,-0.32510723
H,0,0.2367693211,-0.802184214,2.0180170573
H,0,1.1418930011,-2.2734165978,1.6701570372
H,0,1.9895263791,-0.7424536085,1.9518854637
H,0,-2.6281047437,0.967520681,-1.6441727962
Recover connectivity data from disk.
ITRead= 0 0 0 0 0 0 0 0 0 0 0 0 0 0 0 0 0 0 0 0
ITRead= 0 0 0 0 0 0 0 0 0 0 0 0 0 0 0 0 0 0 0 0
ITRead= 0 0 0 0
MicOpt= -1 -1 -1 -1 -1 -1 -1 -1 -1 -1 -1 -1 -1 -1 -1 -1 -1 -1 -1 -1
MicOpt= -1 -1 -1 -1 -1 -1 -1 -1 -1 -1 -1 -1 -1 -1 -1 -1 -1 -1 -1 -1
MicOpt= -1 -1 -1 -1
----------------------------
! Current Parameters !
! (Angstroms and Degrees) !
-------------------------- --------------------------
! Name Definition Value !
--------------------------------------------------------------------------------
! R1 R(1,2) 1.5229 !
! R2 R(1,6) 1.5232 !
! R3 R(1,19) 1.0946 !
! R4 R(1,20) 1.0954 !
! R5 R(2,3) 1.527 !
! R6 R(2,21) 1.0949 !
! R7 R(2,22) 1.0956 !
! R8 R(3,4) 1.5424 !
! R9 R(3,13) 1.4357 !
! R10 R(3,14) 1.5293 !
! R11 R(4,5) 1.5475 !
! R12 R(4,7) 1.505 !
! R13 R(4,23) 1.1014 !
! R14 R(5,6) 1.5375 !
! R15 R(5,10) 1.5344 !
! R16 R(5,17) 1.5344 !
! R17 R(6,15) 1.4295 !
! R18 R(6,24) 1.0971 !
! R19 R(7,8) 1.3368 !
! R20 R(7,25) 1.0878 !
! R21 R(8,9) 1.5034 !
! R22 R(8,11) 1.5081 !
! R23 R(9,10) 1.5275 !
! R24 R(9,26) 1.0976 !
! R25 R(9,27) 1.0961 !
! R26 R(10,28) 1.0938 !
! R27 R(10,29) 1.0968 !
! R28 R(11,12) 1.5268 !
! R29 R(11,16) 1.5324 !
! R30 R(11,30) 1.0969 !
! R31 R(12,31) 1.0934 !
! R32 R(12,32) 1.093 !
! R33 R(12,33) 1.0934 !
! R34 R(13,34) 0.9642 !
! R35 R(14,35) 1.0922 !
! R36 R(14,36) 1.0932 !
! R37 R(14,37) 1.093 !
! R38 R(15,38) 0.9639 !
! R39 R(16,18) 1.422 !
! R40 R(16,39) 1.0984 !
! R41 R(16,40) 1.0929 !
! R42 R(17,41) 1.0913 !
! R43 R(17,42) 1.0943 !
! R44 R(17,43) 1.0888 !
! R45 R(18,44) 0.968 !
! A1 A(2,1,6) 111.6438 !
! A2 A(2,1,19) 109.9536 !
! A3 A(2,1,20) 110.1494 !
! A4 A(6,1,19) 108.8436 !
! A5 A(6,1,20) 109.4135 !
! A6 A(19,1,20) 106.7029 !
! A7 A(1,2,3) 113.9962 !
! A8 A(1,2,21) 110.4831 !
! A9 A(1,2,22) 109.333 !
! A10 A(3,2,21) 108.5721 !
! A11 A(3,2,22) 107.4496 !
! A12 A(21,2,22) 106.7139 !
! A13 A(2,3,4) 108.6824 !
! A14 A(2,3,13) 106.6503 !
! A15 A(2,3,14) 108.6924 !
! A16 A(4,3,13) 112.0846 !
! A17 A(4,3,14) 111.2452 !
! A18 A(13,3,14) 109.3252 !
! A19 A(3,4,5) 115.2065 !
! A20 A(3,4,7) 114.256 !
! A21 A(3,4,23) 103.2558 !
! A22 A(5,4,7) 110.6753 !
! A23 A(5,4,23) 105.5288 !
! A24 A(7,4,23) 106.8861 !
! A25 A(4,5,6) 107.6126 !
! A26 A(4,5,10) 105.6582 !
! A27 A(4,5,17) 114.0989 !
! A28 A(6,5,10) 110.1627 !
! A29 A(6,5,17) 110.422 !
! A30 A(10,5,17) 108.7623 !
! A31 A(1,6,5) 111.826 !
! A32 A(1,6,15) 111.2636 !
! A33 A(1,6,24) 108.7111 !
! A34 A(5,6,15) 112.7071 !
! A35 A(5,6,24) 107.6063 !
! A36 A(15,6,24) 104.3096 !
! A37 A(4,7,8) 124.0309 !
! A38 A(4,7,25) 117.792 !
! A39 A(8,7,25) 118.1684 !
! A40 A(7,8,9) 121.3509 !
! A41 A(7,8,11) 120.4774 !
! A42 A(9,8,11) 118.131 !
! A43 A(8,9,10) 113.2396 !
! A44 A(8,9,26) 108.2894 !
! A45 A(8,9,27) 109.7808 !
! A46 A(10,9,26) 110.2155 !
! A47 A(10,9,27) 110.0208 !
! A48 A(26,9,27) 104.9532 !
! A49 A(5,10,9) 111.9493 !
! A50 A(5,10,28) 109.7256 !
! A51 A(5,10,29) 108.6191 !
! A52 A(9,10,28) 109.8755 !
! A53 A(9,10,29) 109.6068 !
! A54 A(28,10,29) 106.9274 !
! A55 A(8,11,12) 113.726 !
! A56 A(8,11,16) 109.4565 !
! A57 A(8,11,30) 107.8342 !
! A58 A(12,11,16) 109.7887 !
! A59 A(12,11,30) 108.8546 !
! A60 A(16,11,30) 106.9407 !
! A61 A(11,12,31) 110.4255 !
! A62 A(11,12,32) 111.0512 !
! A63 A(11,12,33) 111.4961 !
! A64 A(31,12,32) 108.1148 !
! A65 A(31,12,33) 107.708 !
! A66 A(32,12,33) 107.9052 !
! A67 A(3,13,34) 107.8011 !
! A68 A(3,14,35) 111.6906 !
! A69 A(3,14,36) 109.4476 !
! A70 A(3,14,37) 111.0458 !
! A71 A(35,14,36) 107.8102 !
! A72 A(35,14,37) 108.2736 !
! A73 A(36,14,37) 108.4637 !
! A74 A(6,15,38) 107.9192 !
! A75 A(11,16,18) 112.6071 !
! A76 A(11,16,39) 109.7993 !
! A77 A(11,16,40) 109.7022 !
! A78 A(18,16,39) 110.2711 !
! A79 A(18,16,40) 106.5906 !
! A80 A(39,16,40) 107.7089 !
! A81 A(5,17,41) 111.0379 !
! A82 A(5,17,42) 109.9356 !
! A83 A(5,17,43) 112.4517 !
! A84 A(41,17,42) 107.4531 !
! A85 A(41,17,43) 107.2244 !
! A86 A(42,17,43) 108.5608 !
! A87 A(16,18,44) 106.7409 !
! D1 D(6,1,2,3) 54.1556 !
! D2 D(6,1,2,21) 176.7333 !
! D3 D(6,1,2,22) -66.1113 !
! D4 D(19,1,2,3) 175.0689 !
! D5 D(19,1,2,21) -62.3534 !
! D6 D(19,1,2,22) 54.8021 !
! D7 D(20,1,2,3) -67.6142 !
! D8 D(20,1,2,21) 54.9635 !
! D9 D(20,1,2,22) 172.1189 !
! D10 D(2,1,6,5) -56.7087 !
! D11 D(2,1,6,15) 176.2737 !
! D12 D(2,1,6,24) 61.9544 !
! D13 D(19,1,6,5) -178.2665 !
! D14 D(19,1,6,15) 54.7159 !
! D15 D(19,1,6,24) -59.6034 !
! D16 D(20,1,6,5) 65.485 !
! D17 D(20,1,6,15) -61.5326 !
! D18 D(20,1,6,24) -175.8519 !
! D19 D(1,2,3,4) -50.8443 !
! D20 D(1,2,3,13) 70.1788 !
! D21 D(1,2,3,14) -172.0572 !
! D22 D(21,2,3,4) -174.4619 !
! D23 D(21,2,3,13) -53.4388 !
! D24 D(21,2,3,14) 64.3252 !
! D25 D(22,2,3,4) 70.4734 !
! D26 D(22,2,3,13) -168.5035 !
! D27 D(22,2,3,14) -50.7395 !
! D28 D(2,3,4,5) 53.453 !
! D29 D(2,3,4,7) -176.7468 !
! D30 D(2,3,4,23) -61.059 !
! D31 D(13,3,4,5) -64.1676 !
! D32 D(13,3,4,7) 65.6326 !
! D33 D(13,3,4,23) -178.6796 !
! D34 D(14,3,4,5) 173.0862 !
! D35 D(14,3,4,7) -57.1136 !
! D36 D(14,3,4,23) 58.5741 !
! D37 D(2,3,13,34) -169.1399 !
! D38 D(4,3,13,34) -50.3133 !
! D39 D(14,3,13,34) 73.5139 !
! D40 D(2,3,14,35) -172.2253 !
! D41 D(2,3,14,36) -52.9154 !
! D42 D(2,3,14,37) 66.8028 !
! D43 D(4,3,14,35) 68.1474 !
! D44 D(4,3,14,36) -172.5426 !
! D45 D(4,3,14,37) -52.8245 !
! D46 D(13,3,14,35) -56.1728 !
! D47 D(13,3,14,36) 63.1372 !
! D48 D(13,3,14,37) -177.1447 !
! D49 D(3,4,5,6) -56.4006 !
! D50 D(3,4,5,10) -174.0825 !
! D51 D(3,4,5,17) 66.4907 !
! D52 D(7,4,5,6) 172.075 !
! D53 D(7,4,5,10) 54.3932 !
! D54 D(7,4,5,17) -65.0336 !
! D55 D(23,4,5,6) 56.7921 !
! D56 D(23,4,5,10) -60.8898 !
! D57 D(23,4,5,17) 179.6834 !
! D58 D(3,4,7,8) -157.5183 !
! D59 D(3,4,7,25) 23.578 !
! D60 D(5,4,7,8) -25.5037 !
! D61 D(5,4,7,25) 155.5925 !
! D62 D(23,4,7,8) 88.9276 !
! D63 D(23,4,7,25) -89.9762 !
! D64 D(4,5,6,1) 56.2851 !
! D65 D(4,5,6,15) -177.4814 !
! D66 D(4,5,6,24) -63.0321 !
! D67 D(10,5,6,1) 171.0077 !
! D68 D(10,5,6,15) -62.7587 !
! D69 D(10,5,6,24) 51.6906 !
! D70 D(17,5,6,1) -68.8375 !
! D71 D(17,5,6,15) 57.3961 !
! D72 D(17,5,6,24) 171.8454 !
! D73 D(4,5,10,9) -64.438 !
! D74 D(4,5,10,28) 173.2931 !
! D75 D(4,5,10,29) 56.7294 !
! D76 D(6,5,10,9) 179.6061 !
! D77 D(6,5,10,28) 57.3372 !
! D78 D(6,5,10,29) -59.2265 !
! D79 D(17,5,10,9) 58.4545 !
! D80 D(17,5,10,28) -63.8144 !
! D81 D(17,5,10,29) 179.6219 !
! D82 D(4,5,17,41) 45.4641 !
! D83 D(4,5,17,42) 164.2364 !
! D84 D(4,5,17,43) -74.6828 !
! D85 D(6,5,17,41) 166.8128 !
! D86 D(6,5,17,42) -74.4149 !
! D87 D(6,5,17,43) 46.6659 !
! D88 D(10,5,17,41) -72.1947 !
! D89 D(10,5,17,42) 46.5776 !
! D90 D(10,5,17,43) 167.6584 !
! D91 D(1,6,15,38) 55.4299 !
! D92 D(5,6,15,38) -71.105 !
! D93 D(24,6,15,38) 172.4637 !
! D94 D(4,7,8,9) 1.3455 !
! D95 D(4,7,8,11) -176.2922 !
! D96 D(25,7,8,9) -179.7545 !
! D97 D(25,7,8,11) 2.6077 !
! D98 D(7,8,9,10) -9.1169 !
! D99 D(7,8,9,26) 113.4308 !
! D100 D(7,8,9,27) -132.511 !
! D101 D(11,8,9,10) 168.5745 !
! D102 D(11,8,9,26) -68.8778 !
! D103 D(11,8,9,27) 45.1805 !
! D104 D(7,8,11,12) -136.6308 !
! D105 D(7,8,11,16) 100.1756 !
! D106 D(7,8,11,30) -15.8187 !
! D107 D(9,8,11,12) 45.6567 !
! D108 D(9,8,11,16) -77.5368 !
! D109 D(9,8,11,30) 166.4688 !
! D110 D(8,9,10,5) 41.8909 !
! D111 D(8,9,10,28) 164.0742 !
! D112 D(8,9,10,29) -78.7042 !
! D113 D(26,9,10,5) -79.5805 !
! D114 D(26,9,10,28) 42.6027 !
! D115 D(26,9,10,29) 159.8244 !
! D116 D(27,9,10,5) 165.1528 !
! D117 D(27,9,10,28) -72.6639 !
! D118 D(27,9,10,29) 44.5577 !
! D119 D(8,11,12,31) 175.5637 !
! D120 D(8,11,12,32) 55.6402 !
! D121 D(8,11,12,33) -64.7335 !
! D122 D(16,11,12,31) -61.4244 !
! D123 D(16,11,12,32) 178.6521 !
! D124 D(16,11,12,33) 58.2784 !
! D125 D(30,11,12,31) 55.3254 !
! D126 D(30,11,12,32) -64.598 !
! D127 D(30,11,12,33) 175.0282 !
! D128 D(8,11,16,18) -57.9704 !
! D129 D(8,11,16,39) 65.3135 !
! D130 D(8,11,16,40) -176.5019 !
! D131 D(12,11,16,18) 176.5356 !
! D132 D(12,11,16,39) -60.1805 !
! D133 D(12,11,16,40) 58.0041 !
! D134 D(30,11,16,18) 58.5906 !
! D135 D(30,11,16,39) -178.1254 !
! D136 D(30,11,16,40) -59.9409 !
! D137 D(11,16,18,44) 42.1381 !
! D138 D(39,16,18,44) -80.8824 !
! D139 D(40,16,18,44) 162.4772 !
--------------------------------------------------------------------------------
NAtoms= 44 NQM= 44 NQMF= 0 NMMI= 0 NMMIF= 0
NMic= 0 NMicF= 0.
Isotopes and Nuclear Properties:
(Nuclear quadrupole moments (NQMom) in fm**2, nuclear magnetic moments (NMagM)
in nuclear magnetons)
Atom 1 2 3 4 5 6 7 8 9 10
IAtWgt= 12 12 12 12 12 12 12 12 12 12
AtmWgt= 12.0000000 12.0000000 12.0000000 12.0000000 12.0000000 12.0000000 12.0000000 12.0000000 12.0000000 12.0000000
NucSpn= 0 0 0 0 0 0 0 0 0 0
AtZEff= 3.6000000 3.6000000 3.6000000 3.6000000 3.6000000 3.6000000 3.6000000 3.6000000 3.6000000 3.6000000
NQMom= 0.0000000 0.0000000 0.0000000 0.0000000 0.0000000 0.0000000 0.0000000 0.0000000 0.0000000 0.0000000
NMagM= 0.0000000 0.0000000 0.0000000 0.0000000 0.0000000 0.0000000 0.0000000 0.0000000 0.0000000 0.0000000
AtZNuc= 6.0000000 6.0000000 6.0000000 6.0000000 6.0000000 6.0000000 6.0000000 6.0000000 6.0000000 6.0000000
Atom 11 12 13 14 15 16 17 18 19 20
IAtWgt= 12 12 16 12 16 12 12 16 1 1
AtmWgt= 12.0000000 12.0000000 15.9949146 12.0000000 15.9949146 12.0000000 12.0000000 15.9949146 1.0078250 1.0078250
NucSpn= 0 0 0 0 0 0 0 0 1 1
AtZEff= 3.6000000 3.6000000 5.6000000 3.6000000 5.6000000 3.6000000 3.6000000 5.6000000 1.0000000 1.0000000
NQMom= 0.0000000 0.0000000 0.0000000 0.0000000 0.0000000 0.0000000 0.0000000 0.0000000 0.0000000 0.0000000
NMagM= 0.0000000 0.0000000 0.0000000 0.0000000 0.0000000 0.0000000 0.0000000 0.0000000 2.7928460 2.7928460
AtZNuc= 6.0000000 6.0000000 8.0000000 6.0000000 8.0000000 6.0000000 6.0000000 8.0000000 1.0000000 1.0000000
Atom 21 22 23 24 25 26 27 28 29 30
IAtWgt= 1 1 1 1 1 1 1 1 1 1
AtmWgt= 1.0078250 1.0078250 1.0078250 1.0078250 1.0078250 1.0078250 1.0078250 1.0078250 1.0078250 1.0078250
NucSpn= 1 1 1 1 1 1 1 1 1 1
AtZEff= 1.0000000 1.0000000 1.0000000 1.0000000 1.0000000 1.0000000 1.0000000 1.0000000 1.0000000 1.0000000
NQMom= 0.0000000 0.0000000 0.0000000 0.0000000 0.0000000 0.0000000 0.0000000 0.0000000 0.0000000 0.0000000
NMagM= 2.7928460 2.7928460 2.7928460 2.7928460 2.7928460 2.7928460 2.7928460 2.7928460 2.7928460 2.7928460
AtZNuc= 1.0000000 1.0000000 1.0000000 1.0000000 1.0000000 1.0000000 1.0000000 1.0000000 1.0000000 1.0000000
Atom 31 32 33 34 35 36 37 38 39 40
IAtWgt= 1 1 1 1 1 1 1 1 1 1
AtmWgt= 1.0078250 1.0078250 1.0078250 1.0078250 1.0078250 1.0078250 1.0078250 1.0078250 1.0078250 1.0078250
NucSpn= 1 1 1 1 1 1 1 1 1 1
AtZEff= 1.0000000 1.0000000 1.0000000 1.0000000 1.0000000 1.0000000 1.0000000 1.0000000 1.0000000 1.0000000
NQMom= 0.0000000 0.0000000 0.0000000 0.0000000 0.0000000 0.0000000 0.0000000 0.0000000 0.0000000 0.0000000
NMagM= 2.7928460 2.7928460 2.7928460 2.7928460 2.7928460 2.7928460 2.7928460 2.7928460 2.7928460 2.7928460
AtZNuc= 1.0000000 1.0000000 1.0000000 1.0000000 1.0000000 1.0000000 1.0000000 1.0000000 1.0000000 1.0000000
Atom 41 42 43 44
IAtWgt= 1 1 1 1
AtmWgt= 1.0078250 1.0078250 1.0078250 1.0078250
NucSpn= 1 1 1 1
AtZEff= 1.0000000 1.0000000 1.0000000 1.0000000
NQMom= 0.0000000 0.0000000 0.0000000 0.0000000
NMagM= 2.7928460 2.7928460 2.7928460 2.7928460
AtZNuc= 1.0000000 1.0000000 1.0000000 1.0000000
Leave Link 101 at Wed May 20 10:15:01 2020, MaxMem= 3221225472 cpu: 4.5 elap: 0.4
(Enter /public/apps/g16/l202.exe)
Input orientation:
---------------------------------------------------------------------
Center Atomic Atomic Coordinates (Angstroms)
Number Number Type X Y Z
---------------------------------------------------------------------
1 6 0 3.422534 -0.134316 -0.265310
2 6 0 2.959561 1.285395 -0.564038
3 6 0 1.598196 1.633394 0.033844
4 6 0 0.590488 0.533598 -0.358635
5 6 0 1.022994 -0.911018 -0.011091
6 6 0 2.381763 -1.164561 -0.684442
7 6 0 -0.818215 0.792273 0.103621
8 6 0 -1.738831 -0.162900 0.268322
9 6 0 -1.415976 -1.610829 0.024412
10 6 0 -0.048795 -1.822723 -0.622953
11 6 0 -3.151743 0.195134 0.655519
12 6 0 -3.742109 -0.711762 1.732594
13 8 0 1.781888 1.714800 1.455383
14 6 0 1.163411 2.999232 -0.499314
15 8 0 2.859011 -2.496394 -0.479882
16 6 0 -4.044156 0.170307 -0.589936
17 6 0 1.110514 -1.193730 1.494455
18 8 0 -3.591121 1.057405 -1.604804
19 1 0 4.358042 -0.341313 -0.794625
20 1 0 3.634507 -0.245020 0.803709
21 1 0 3.694865 2.012046 -0.203375
22 1 0 2.886828 1.422534 -1.648558
23 1 0 0.580047 0.581632 -1.458911
24 1 0 2.233027 -1.093408 -1.769118
25 1 0 -1.106925 1.822802 0.298440
26 1 0 -1.467742 -2.141630 0.983766
27 1 0 -2.198396 -2.066369 -0.593445
28 1 0 0.253500 -2.868793 -0.519542
29 1 0 -0.114148 -1.613942 -1.697753
30 1 0 -3.147351 1.227945 1.025045
31 1 0 -4.733763 -0.358185 2.027653
32 1 0 -3.108299 -0.727955 2.622884
33 1 0 -3.848016 -1.740125 1.376605
34 1 0 0.909462 1.762268 1.863087
35 1 0 0.261183 3.359012 0.000198
36 1 0 1.957666 3.729017 -0.321482
37 1 0 0.966574 2.956713 -1.573597
38 1 0 3.121006 -2.578917 0.444090
39 1 0 -4.108779 -0.854128 -0.980995
40 1 0 -5.055287 0.489443 -0.325107
41 1 0 0.236769 -0.802184 2.018017
42 1 0 1.141893 -2.273417 1.670157
43 1 0 1.989526 -0.742454 1.951885
44 1 0 -2.628105 0.967521 -1.644173
---------------------------------------------------------------------
Distance matrix (angstroms):
1 2 3 4 5
1 C 0.000000
2 C 1.522880 0.000000
3 C 2.557832 1.527049 0.000000
4 C 2.911237 2.493971 1.542422 0.000000
5 C 2.534894 2.979978 2.609005 1.547502 0.000000
6 C 1.523247 2.520046 2.993069 2.489690 1.537510
7 C 4.356447 3.867884 2.559569 1.505004 2.510858
8 C 5.188956 4.986508 3.797025 2.510759 2.874965
9 C 5.067071 5.280123 4.428352 2.961619 2.537631
10 C 3.876694 4.325976 3.884418 2.455767 1.534377
11 C 6.646622 6.326454 5.001699 3.891961 4.369939
12 C 7.460374 7.360403 6.074897 4.969463 5.078026
13 O 3.011932 2.376839 1.435668 2.470897 3.101835
14 C 3.870080 2.483461 1.529316 2.535228 3.943112
15 O 2.437829 3.784061 4.348415 3.787050 2.470656
16 C 7.479950 7.091977 5.862241 4.654612 5.213476
17 C 3.092664 3.715162 3.219294 2.586123 1.534358
18 O 7.239186 6.636762 5.472289 4.394676 5.263523
19 H 1.094622 2.157568 3.493219 3.892302 3.472900
20 H 1.095440 2.160661 2.875360 3.350125 2.815573
21 H 2.164456 1.094884 2.143752 3.441957 3.964867
22 H 2.150381 1.095574 2.129674 2.779800 3.405971
23 H 3.164964 2.637834 2.090729 1.101373 2.126120
24 H 2.143881 2.763833 3.330035 2.708236 2.141986
25 H 4.966299 4.191536 2.724622 2.230472 3.479387
26 H 5.431786 5.808718 4.955112 3.632519 2.950917
27 H 5.952761 6.151399 5.338151 3.820058 3.471503
28 H 4.193421 4.958027 4.731188 3.422823 2.164146
29 H 4.092592 4.374832 4.059032 2.627104 2.152214
30 H 6.832581 6.310535 4.864883 4.045755 4.800054
31 H 8.475434 8.282841 6.930756 5.902313 6.132076
32 H 7.165603 7.143457 5.867725 4.915486 4.902950
33 H 7.624658 7.698244 6.545599 5.280265 5.132237
34 H 3.800347 3.212670 1.958850 2.558793 3.266785
35 H 4.718896 3.449564 2.183230 2.867084 4.337469
36 H 4.132111 2.652153 2.155716 3.475811 4.743404
37 H 4.159064 2.790073 2.175772 2.736615 4.171804
38 H 2.563249 3.996911 4.497868 4.090921 2.718590
39 H 7.599409 7.396812 6.307712 4.939254 5.222934
40 H 8.500948 8.057817 6.760645 5.646048 6.245430
41 H 3.976019 4.294018 3.423809 2.749165 2.178824
42 H 3.677378 4.578284 4.260153 3.507046 2.167225
43 H 2.709114 3.373871 3.078421 2.987326 2.194510
44 H 6.302820 5.699977 4.595731 3.492884 4.418867
6 7 8 9 10
6 C 0.000000
7 C 3.832766 0.000000
8 C 4.346305 1.336793 0.000000
9 C 3.889016 2.477598 1.503404 0.000000
10 C 2.518842 2.821014 2.530929 1.527470 0.000000
11 C 5.853541 2.471137 1.508122 2.583154 3.915932
12 C 6.599159 3.669446 2.541351 3.022765 4.519226
13 O 3.637227 3.072271 4.162972 4.830509 4.492766
14 C 4.342329 3.026720 4.360201 5.308501 4.973527
15 O 1.429472 4.967675 5.210101 4.394775 2.988250
16 C 6.563782 3.357762 2.482370 3.233760 4.464994
17 C 2.522800 3.098164 3.268757 2.952651 2.494603
18 O 6.438908 3.267725 2.903228 3.808553 4.669823
19 H 2.143725 5.374523 6.191409 5.968398 4.652339
20 H 2.151631 4.625239 5.400569 5.289623 4.253378
21 H 3.470806 4.685081 5.871792 6.268796 5.375545
22 H 2.806719 4.146650 5.252119 5.523970 4.494601
23 H 2.625865 2.107371 2.985776 3.315303 2.622058
24 H 1.097136 4.046359 4.559897 4.098743 2.655618
25 H 4.696949 1.087795 2.084041 3.458385 3.906207
26 H 4.307698 3.131186 2.121489 1.097629 2.167177
27 H 4.668982 3.250022 2.139402 1.096106 2.163567
28 H 2.731502 3.865270 3.451371 2.159979 1.093773
29 H 2.730991 3.087156 2.934377 2.158846 1.096839
30 H 6.262390 2.542382 2.119200 3.472400 4.650110
31 H 7.657441 4.511870 3.478937 4.073058 5.578486
32 H 6.424159 3.728575 2.781851 3.224203 4.592879
33 H 6.587058 4.148882 2.857375 2.785671 4.294081
34 H 4.150169 2.649806 3.641840 4.490675 4.466632
35 H 5.042649 2.786386 4.059041 5.245261 5.228267
36 H 4.925313 4.063335 5.399905 6.325745 5.910887
37 H 4.447275 3.268536 4.521490 5.393757 4.977721
38 H 1.954602 5.195989 5.430105 4.658060 3.429001
39 H 6.504724 3.835993 2.766811 2.972310 4.189253
40 H 7.627225 4.269461 3.431705 4.216384 5.522661
41 H 3.469236 2.705586 2.715347 2.712919 2.845658
42 H 2.882876 3.961630 3.836403 3.112907 2.622826
43 H 2.698564 3.695251 4.131696 4.008325 3.457098
44 H 5.528619 2.522141 2.392968 3.301714 3.934614
11 12 13 14 15
11 C 0.000000
12 C 1.526789 0.000000
13 O 5.223972 6.039834 0.000000
14 C 5.274197 6.543471 2.419323 0.000000
15 O 6.683010 7.187124 4.758108 5.751290 0.000000
16 C 1.532376 2.502683 6.364871 5.927038 7.401157
17 C 4.560657 4.882310 2.985266 4.643150 2.941460
18 O 2.458786 3.780341 6.218211 5.253416 7.449775
19 H 7.667305 8.493322 3.990827 4.631643 2.643961
20 H 6.802124 7.449507 2.774486 4.281280 2.705122
21 H 7.135468 8.153263 2.549375 2.733199 4.593597
22 H 6.578725 7.741461 3.307683 2.603249 4.089568
23 H 4.306559 5.526265 3.349866 2.665695 3.953026
24 H 6.044415 6.936130 4.299647 4.416580 2.005581
25 H 2.637819 3.927469 3.113748 2.678586 5.915225
26 H 2.898978 2.788909 5.065034 5.962461 4.581366
27 H 2.753758 3.102978 5.859830 6.080372 5.076927
28 H 4.729069 5.068510 5.219734 5.938187 2.632289
29 H 4.247073 5.073787 4.961627 4.934550 3.331907
30 H 1.096935 2.148680 4.971883 4.903447 7.225779
31 H 2.166034 1.093368 6.861376 7.241165 8.277070
32 H 2.173593 1.092975 5.589637 6.472059 6.954375
33 H 2.179448 1.093378 6.605947 7.148075 7.000193
34 H 4.517467 5.270196 0.964159 2.678714 5.237026
35 H 4.699748 5.966468 2.670870 1.092232 6.423781
36 H 6.288793 7.511803 2.691695 1.093185 6.292317
37 H 5.436525 6.823511 3.373693 1.092993 5.874854
38 H 6.862029 7.228337 4.609984 5.986479 0.963937
39 H 2.166806 2.741949 6.872793 6.548006 7.176228
40 H 2.161418 2.720563 7.170678 6.708323 8.460218
41 H 3.785903 3.990127 3.006519 4.652568 3.998249
42 H 5.055546 5.127976 4.044946 5.701569 2.760595
43 H 5.384448 5.735911 2.515496 4.548742 3.121827
44 H 2.481806 3.932372 5.441848 4.451308 6.592626
16 17 18 19 20
16 C 0.000000
17 C 5.725025 0.000000
18 O 1.422020 6.064519 0.000000
19 H 8.420249 4.063612 8.111843 0.000000
20 H 7.815153 2.783474 7.727028 1.757113 0.000000
21 H 7.964540 4.454043 7.480705 2.515488 2.472288
22 H 7.122310 4.458550 6.488379 2.450475 3.058328
23 H 4.723088 3.486499 4.200749 3.945421 3.890055
24 H 6.510797 3.452682 6.210773 2.455804 3.050139
25 H 3.485295 3.930261 3.221708 5.978632 5.197342
26 H 3.802565 2.794050 4.630687 6.351659 5.446328
27 H 2.899925 4.008705 3.566580 6.782564 6.268343
28 H 5.264117 2.756174 5.601244 4.828157 4.479553
29 H 4.455981 3.444789 4.385667 4.736635 4.709955
30 H 2.128620 4.920799 2.672476 7.880653 6.943502
31 H 2.758012 5.927732 4.062545 9.519793 8.458061
32 H 3.464811 4.391888 4.614540 8.220409 7.000576
33 H 2.748728 4.989935 4.096459 8.602924 7.651908
34 H 5.752390 2.985672 5.725238 4.835410 3.546457
35 H 5.389995 4.866377 4.765887 5.577491 5.001399
36 H 6.982718 5.314954 6.290745 4.749027 4.457670
37 H 5.817136 5.163317 4.937705 4.794354 4.797973
38 H 7.743835 2.657836 7.904015 2.841047 2.416627
39 H 1.098440 5.786553 2.076310 8.484384 7.969609
40 H 1.092871 6.645373 2.025830 9.461574 8.793531
41 H 5.106220 1.091263 5.588887 5.010813 3.650973
42 H 6.162379 1.094339 6.649900 4.489075 3.328401
43 H 6.610546 1.088832 6.858073 3.648849 2.066812
44 H 1.937051 5.338470 0.968003 7.158284 6.832473
21 22 23 24 25
21 H 0.000000
22 H 1.757556 0.000000
23 H 3.650281 2.462585 0.000000
24 H 3.772581 2.602298 2.373674 0.000000
25 H 4.831648 4.461063 2.733982 4.892275 0.000000
26 H 6.731629 6.212461 4.192405 4.729992 4.039379
27 H 7.177476 6.256614 3.934551 4.686830 4.136717
28 H 5.980431 5.159902 3.590888 2.938020 4.952869
29 H 5.467133 4.269481 2.315058 2.405261 4.096535
30 H 6.995695 6.602828 4.525622 6.491879 2.246141
31 H 9.035334 8.646323 6.424637 7.968198 4.571744
32 H 7.859923 7.668858 5.655084 6.924811 3.989349
33 H 8.571475 8.031946 5.747908 6.876983 4.622821
34 H 3.477230 4.044385 3.540916 4.806206 2.552959
35 H 3.694041 3.655457 3.153493 5.180994 2.078607
36 H 2.445364 2.818571 3.619063 5.042545 3.661922
37 H 3.195853 2.459005 2.409060 4.248013 3.014908
38 H 4.671774 4.521684 4.479615 2.809543 6.105059
39 H 8.349641 7.386971 4.926956 6.395068 4.220668
40 H 8.882472 8.105516 5.749000 7.596717 4.213814
41 H 4.981255 5.041424 3.757900 4.290950 3.413651
42 H 5.328506 5.264857 4.272942 3.796262 4.870092
43 H 3.891092 4.295988 3.920888 3.745441 4.347692
44 H 6.568629 5.533674 3.236583 5.281443 2.611367
26 27 28 29 30
26 H 0.000000
27 H 1.739861 0.000000
28 H 2.398202 2.580918 0.000000
29 H 3.049789 2.401724 1.760113 0.000000
30 H 3.765213 3.791113 5.543897 4.968930 0.000000
31 H 3.864877 4.026926 6.137112 6.066005 2.457181
32 H 2.715993 3.600563 5.075404 5.330837 2.525898
33 H 2.445656 2.590131 4.657434 4.838323 3.069849
34 H 4.654537 5.509246 5.249184 5.012599 4.176786
35 H 5.849243 5.986377 6.249460 5.268224 4.148476
36 H 6.921097 7.136759 6.817222 5.893535 5.842062
37 H 6.201540 6.017399 5.962888 4.698326 5.163909
38 H 4.641021 5.443824 3.038948 3.998111 7.356766
39 H 3.534547 2.295492 4.827141 4.128938 3.046895
40 H 4.637475 3.842656 6.284805 5.542855 2.451228
41 H 2.401905 3.787867 3.272668 3.819560 4.069360
42 H 2.701609 4.040334 2.436903 3.654499 5.574344
43 H 3.853265 5.076432 3.693652 4.301721 5.579338
44 H 4.233122 3.239316 4.928057 3.603720 2.731696
31 32 33 34 35
31 H 0.000000
32 H 1.770074 0.000000
33 H 1.765834 1.767733 0.000000
34 H 6.030704 4.787578 5.927648 0.000000
35 H 6.548100 5.910600 6.691877 2.537757 0.000000
36 H 8.185284 7.361922 8.154812 3.120765 1.765910
37 H 7.513414 6.913163 7.344675 3.638785 1.770947
38 H 8.314849 6.854010 7.080990 5.074482 6.605652
39 H 3.112640 3.742303 2.532048 6.333803 6.148972
40 H 2.521375 3.736773 3.053572 6.479700 6.050216
41 H 4.990333 3.400126 4.239883 2.655736 4.624688
42 H 6.190254 4.621718 5.026904 4.046974 5.940426
43 H 6.734688 5.141816 5.950058 2.729112 4.859864
44 H 4.435493 4.616601 4.236110 5.044489 4.095262
36 37 38 39 40
36 H 0.000000
37 H 1.773840 0.000000
38 H 6.459837 6.273423 0.000000
39 H 7.631640 6.374393 7.568061 0.000000
40 H 7.725048 6.626384 8.766885 1.769534 0.000000
41 H 5.382056 5.249916 3.735351 5.280205 5.929958
42 H 6.376623 6.156861 2.348076 6.050830 7.072448
43 H 5.016300 5.211458 2.631785 6.767835 7.505442
44 H 5.514043 4.108964 7.070384 2.439386 2.803517
41 42 43 44
41 H 0.000000
42 H 1.762039 0.000000
43 H 1.755021 1.772484 0.000000
44 H 4.975037 5.975060 6.097390 0.000000
Stoichiometry C15H26O3
Framework group C1[X(C15H26O3)]
Deg. of freedom 126
Full point group C1 NOp 1
RotChk: IX=0 Diff= 1.06D-15
Largest Abelian subgroup C1 NOp 1
Largest concise Abelian subgroup C1 NOp 1
Standard orientation:
---------------------------------------------------------------------
Center Atomic Atomic Coordinates (Angstroms)
Number Number Type X Y Z
---------------------------------------------------------------------
1 6 0 3.423105 -0.152944 -0.184231
2 6 0 2.980687 1.292892 -0.365850
3 6 0 1.602331 1.598336 0.216145
4 6 0 0.600700 0.549682 -0.309332
5 6 0 1.010834 -0.925131 -0.082440
6 6 0 2.389831 -1.129555 -0.730911
7 6 0 -0.821000 0.779146 0.127879
8 6 0 -1.753472 -0.177653 0.173130
9 6 0 -1.432870 -1.600234 -0.192522
10 6 0 -0.046050 -1.765664 -0.811009
11 6 0 -3.176121 0.157692 0.544673
12 6 0 -3.809169 -0.838346 1.513302
13 8 0 1.738239 1.546744 1.644435
14 6 0 1.195658 3.011807 -0.202812
15 8 0 2.850340 -2.479375 -0.634423
16 6 0 -4.025898 0.256677 -0.726648
17 6 0 1.045176 -1.346021 1.392663
18 8 0 -3.532352 1.228686 -1.639749
19 1 0 4.374540 -0.319939 -0.699092
20 1 0 3.597872 -0.363682 0.876445
21 1 0 3.708495 1.975718 0.084502
22 1 0 2.945792 1.529952 -1.434900
23 1 0 0.627957 0.698830 -1.400219
24 1 0 2.278513 -0.957406 -1.808723
25 1 0 -1.108791 1.790286 0.407290
26 1 0 -1.520960 -2.216477 0.711509
27 1 0 -2.197099 -1.988972 -0.875372
28 1 0 0.245083 -2.819852 -0.794611
29 1 0 -0.073389 -1.458240 -1.863530
30 1 0 -3.176901 1.152032 1.007874
31 1 0 -4.807718 -0.503278 1.806701
32 1 0 -3.206077 -0.942857 2.418814
33 1 0 -3.910270 -1.828464 1.060619
34 1 0 0.852837 1.565436 2.025639
35 1 0 0.279585 3.333330 0.297593
36 1 0 1.988608 3.713970 0.067834
37 1 0 1.035102 3.070309 -1.282365
38 1 0 3.080223 -2.649222 0.286164
39 1 0 -4.084521 -0.726725 -1.212502
40 1 0 -5.043131 0.560433 -0.467157
41 1 0 0.156980 -0.995372 1.920876
42 1 0 1.062863 -2.437556 1.468922
43 1 0 1.911354 -0.947760 1.918666
44 1 0 -2.569220 1.132950 -1.655305
---------------------------------------------------------------------
Rotational constants (GHZ): 0.6604707 0.2893052 0.2434674
Leave Link 202 at Wed May 20 10:15:01 2020, MaxMem= 3221225472 cpu: 0.1 elap: 0.0
(Enter /public/apps/g16/l301.exe)
Standard basis: 6-311+G(2d,p) (5D, 7F)
Ernie: Thresh= 0.10000D-02 Tol= 0.10000D-05 Strict=F.
There are 678 symmetry adapted cartesian basis functions of A symmetry.
There are 642 symmetry adapted basis functions of A symmetry.
642 basis functions, 964 primitive gaussians, 678 cartesian basis functions
70 alpha electrons 70 beta electrons
nuclear repulsion energy 1522.7111456632 Hartrees.
IExCor= 3731 DFT=T Ex+Corr=APFD ExCW=0 ScaHFX= 0.229450
ScaDFX= 1.000000 1.000000 1.000000 1.000000 ScalE2= 1.000000 1.000000
IRadAn= 5 IRanWt= -1 IRanGd= 0 ICorTp=0 IEmpDi=211
NAtoms= 44 NActive= 44 NUniq= 44 SFac= 1.00D+00 NAtFMM= 60 NAOKFM=F Big=F
Integral buffers will be 131072 words long.
Regular integral format.
Two-electron integral symmetry is turned on.
R6APFD: NTU= -4 IXU= 1 FactS= 1.050
R6Disp: Petersson-Frisch Dispersion energy= -0.0527125895 Hartrees.
Nuclear repulsion after empirical dispersion term = 1522.6584330737 Hartrees.
------------------------------------------------------------------------------
Polarizable Continuum Model (PCM)
=================================
Model : PCM.
Atomic radii : Bondi.
Polarization charges : Total charges.
Charge compensation : None.
Solution method : Matrix inversion.
Cavity type : Scaled VdW (van der Waals Surface) (Alpha=1.100).
Cavity algorithm : GePol (No added spheres)
Default sphere list used, NSphG= 44.
Lebedev-Laikov grids with approx. 5.0 points / Ang**2.
Smoothing algorithm: York/Karplus (Gamma=1.0000).
Polarization charges: spherical gaussians, with
point-specific exponents (IZeta= 3).
Self-potential: point-specific (ISelfS= 7).
Self-field : sphere-specific E.n sum rule (ISelfD= 2).
Solvent : Methanol, Eps= 32.613000 Eps(inf)= 1.765709
------------------------------------------------------------------------------
GePol: Number of generator spheres = 44
GePol: Total number of spheres = 44
GePol: Number of exposed spheres = 44 (100.00%)
GePol: Number of points = 2447
GePol: Average weight of points = 0.13
GePol: Minimum weight of points = 0.12D-11
GePol: Maximum weight of points = 0.21770
GePol: Number of points with low weight = 226
GePol: Fraction of low-weight points (<1% of avg) = 9.24%
GePol: Cavity surface area = 307.142 Ang**2
GePol: Cavity volume = 298.527 Ang**3
Leave Link 301 at Wed May 20 10:15:01 2020, MaxMem= 3221225472 cpu: 1.0 elap: 0.1
(Enter /public/apps/g16/l302.exe)
NPDir=0 NMtPBC= 1 NCelOv= 1 NCel= 1 NClECP= 1 NCelD= 1
NCelK= 1 NCelE2= 1 NClLst= 1 CellRange= 0.0.
One-electron integrals computed using PRISM.
One-electron integral symmetry used in STVInt
NBasis= 642 RedAO= T EigKep= 1.89D-06 NBF= 642
NBsUse= 640 1.00D-06 EigRej= 8.32D-07 NBFU= 640
Precomputing XC quadrature grid using
IXCGrd= 4 IRadAn= 5 IRanWt= -1 IRanGd= 0 AccXCQ= 0.00D+00.
Generated NRdTot= 0 NPtTot= 0 NUsed= 0 NTot= 32
NSgBfM= 677 677 677 677 677 MxSgAt= 44 MxSgA2= 44.
Leave Link 302 at Wed May 20 10:15:02 2020, MaxMem= 3221225472 cpu: 11.2 elap: 1.0
(Enter /public/apps/g16/l303.exe)
DipDrv: MaxL=1.
Leave Link 303 at Wed May 20 10:15:03 2020, MaxMem= 3221225472 cpu: 1.2 elap: 0.1
(Enter /public/apps/g16/l308.exe)
Leave Link 308 at Wed May 20 10:15:03 2020, MaxMem= 3221225472 cpu: 1.5 elap: 0.2
(Enter /public/apps/g16/l401.exe)
Initial guess from the checkpoint file: "CONF_1_ecd.chk"
B after Tr= 0.000000 0.000000 -0.000000
Rot= 1.000000 0.000000 0.000000 0.000000 Ang= 0.00 deg.
Guess basis will be translated and rotated to current coordinates.
JPrj=2 DoOrth=T DoCkMO=T.
Leave Link 401 at Wed May 20 10:15:03 2020, MaxMem= 3221225472 cpu: 8.1 elap: 0.7
(Enter /public/apps/g16/l502.exe)
Integral symmetry usage will be decided dynamically.
Closed shell SCF:
Using DIIS extrapolation, IDIIS= 1040.
NGot= 3221225472 LenX= 3220290486 LenY= 3219830124
Requested convergence on RMS density matrix=1.00D-08 within 128 cycles.
Requested convergence on MAX density matrix=1.00D-06.
Requested convergence on energy=1.00D-06.
No special actions if energy rises.
Fock matrices will be formed incrementally for 20 cycles.
Cycle 1 Pass 1 IDiag 1:
FoFJK: IHMeth= 1 ICntrl= 0 DoSepK=F KAlg= 0 I1Cent= 0 FoldK=F
IRaf= 870000000 NMat= 1 IRICut= 1 DoRegI=T DoRafI=F ISym2E= 0 IDoP0=0 IntGTp=1.
FoFCou: FMM=F IPFlag= 0 FMFlag= 100000 FMFlg1= 0
NFxFlg= 0 DoJE=F BraDBF=F KetDBF=F FulRan=T
wScrn= 0.000000 ICntrl= 0 IOpCl= 0 I1Cent= 0 NGrid= 0
NMat0= 1 NMatS0= 1 NMatT0= 0 NMatD0= 1 NMtDS0= 0 NMtDT0= 0
Symmetry not used in FoFCou.
Inv3: Mode=1 IEnd= 17963427.
Iteration 1 A*A^-1 deviation from unit magnitude is 3.55D-15 for 2171.
Iteration 1 A*A^-1 deviation from orthogonality is 2.44D-15 for 2240 421.
Iteration 1 A^-1*A deviation from unit magnitude is 3.55D-15 for 2171.
Iteration 1 A^-1*A deviation from orthogonality is 1.64D-14 for 1846 1841.
E= -812.552632049282
DIIS: error= 4.61D-09 at cycle 1 NSaved= 1.
NSaved= 1 IEnMin= 1 EnMin= -812.552632049282 IErMin= 1 ErrMin= 4.61D-09
ErrMax= 4.61D-09 0.00D+00 EMaxC= 1.00D-01 BMatC= 4.10D-14 BMatP= 4.10D-14
IDIUse=1 WtCom= 1.00D+00 WtEn= 0.00D+00
Coeff-Com: 0.100D+01
Coeff: 0.100D+01
Gap= 0.247 Goal= None Shift= 0.000
RMSDP=2.43D-09 MaxDP=3.98D-07 OVMax= 2.44D-07
Error on total polarization charges = 0.04849
SCF Done: E(RAPFD) = -812.552632049 A.U. after 1 cycles
NFock= 1 Conv=0.24D-08 -V/T= 2.0045
KE= 8.089320754634D+02 PE=-4.938691670091D+03 EE= 1.794548529504D+03
Leave Link 502 at Wed May 20 10:15:35 2020, MaxMem= 3221225472 cpu: 371.7 elap: 31.5
(Enter /public/apps/g16/l801.exe)
DoSCS=F DFT=T ScalE2(SS,OS)= 1.000000 1.000000
ExpMin= 4.38D-02 ExpMax= 8.59D+03 ExpMxC= 1.30D+03 IAcc=3 IRadAn= 5 AccDes= 0.00D+00
HarFok: IExCor= 205 AccDes= 0.00D+00 IRadAn= 5 IDoV=-2 UseB2=F ITyADJ=14
ICtDFT= 12500011 ScaDFX= 1.000000 1.000000 1.000000 1.000000
Largest valence mixing into a core orbital is 5.60D-05
Largest core mixing into a valence orbital is 1.38D-05
Range of M.O.s used for correlation: 19 640
NBasis= 642 NAE= 70 NBE= 70 NFC= 18 NFV= 0
NROrb= 622 NOA= 52 NOB= 52 NVA= 570 NVB= 570
**** Warning!!: The largest alpha MO coefficient is 0.13803624D+03
Leave Link 801 at Wed May 20 10:15:35 2020, MaxMem= 3221225472 cpu: 2.1 elap: 0.2
(Enter /public/apps/g16/l914.exe)
RHF ground state
Two-electron integrals replicated using symmetry.
MDV= 3221225472 DFT=T DoStab=F Mixed=T DoRPA=T DoScal=F NonHer=T
NEqPCM: Using non-equilibrium solvation (IEInf=1, Eps= 32.6130, EpsInf= 1.7657)
Inv3: Mode=1 IEnd= 17963427.
Iteration 1 A*A^-1 deviation from unit magnitude is 3.44D-15 for 78.
Iteration 1 A*A^-1 deviation from orthogonality is 2.48D-15 for 1868 1304.
Iteration 1 A^-1*A deviation from unit magnitude is 3.44D-15 for 616.
Iteration 1 A^-1*A deviation from orthogonality is 1.61D-15 for 1814 636.
Making orbital integer symmetry assigments:
Orbital symmetries:
Occupied (A) (A) (A) (A) (A) (A) (A) (A) (A) (A) (A) (A)
(A) (A) (A) (A) (A) (A) (A) (A) (A) (A) (A) (A)
(A) (A) (A) (A) (A) (A) (A) (A) (A) (A) (A) (A)
(A) (A) (A) (A) (A) (A) (A) (A) (A) (A) (A) (A)
(A) (A) (A) (A) (A) (A) (A) (A) (A) (A) (A) (A)
(A) (A) (A) (A) (A) (A) (A) (A) (A) (A)
Virtual (A) (A) (A) (A) (A) (A) (A) (A) (A) (A) (A) (A)
(A) (A) (A) (A) (A) (A) (A) (A) (A) (A) (A) (A)
(A) (A) (A) (A) (A) (A) (A) (A) (A) (A) (A) (A)
(A) (A) (A) (A) (A) (A) (A) (A) (A) (A) (A) (A)
(A) (A) (A) (A) (A) (A) (A) (A) (A) (A) (A) (A)
(A) (A) (A) (A) (A) (A) (A) (A) (A) (A) (A) (A)
(A) (A) (A) (A) (A) (A) (A) (A) (A) (A) (A) (A)
(A) (A) (A) (A) (A) (A) (A) (A) (A) (A) (A) (A)
(A) (A) (A) (A) (A) (A) (A) (A) (A) (A) (A) (A)
(A) (A) (A) (A) (A) (A) (A) (A) (A) (A) (A) (A)
(A) (A) (A) (A) (A) (A) (A) (A) (A) (A) (A) (A)
(A) (A) (A) (A) (A) (A) (A) (A) (A) (A) (A) (A)
(A) (A) (A) (A) (A) (A) (A) (A) (A) (A) (A) (A)
(A) (A) (A) (A) (A) (A) (A) (A) (A) (A) (A) (A)
(A) (A) (A) (A) (A) (A) (A) (A) (A) (A) (A) (A)
(A) (A) (A) (A) (A) (A) (A) (A) (A) (A) (A) (A)
(A) (A) (A) (A) (A) (A) (A) (A) (A) (A) (A) (A)
(A) (A) (A) (A) (A) (A) (A) (A) (A) (A) (A) (A)
(A) (A) (A) (A) (A) (A) (A) (A) (A) (A) (A) (A)
(A) (A) (A) (A) (A) (A) (A) (A) (A) (A) (A) (A)
(A) (A) (A) (A) (A) (A) (A) (A) (A) (A) (A) (A)
(A) (A) (A) (A) (A) (A) (A) (A) (A) (A) (A) (A)
(A) (A) (A) (A) (A) (A) (A) (A) (A) (A) (A) (A)
(A) (A) (A) (A) (A) (A) (A) (A) (A) (A) (A) (A)
(A) (A) (A) (A) (A) (A) (A) (A) (A) (A) (A) (A)
(A) (A) (A) (A) (A) (A) (A) (A) (A) (A) (A) (A)
(A) (A) (A) (A) (A) (A) (A) (A) (A) (A) (A) (A)
(A) (A) (A) (A) (A) (A) (A) (A) (A) (A) (A) (A)
(A) (A) (A) (A) (A) (A) (A) (A) (A) (A) (A) (A)
(A) (A) (A) (A) (A) (A) (A) (A) (A) (A) (A) (A)
(A) (A) (A) (A) (A) (A) (A) (A) (A) (A) (A) (A)
(A) (A) (A) (A) (A) (A) (A) (A) (A) (A) (A) (A)
(A) (A) (A) (A) (A) (A) (A) (A) (A) (A) (A) (A)
(A) (A) (A) (A) (A) (A) (A) (A) (A) (A) (A) (A)
(A) (A) (A) (A) (A) (A) (A) (A) (A) (A) (A) (A)
(A) (A) (A) (A) (A) (A) (A) (A) (A) (A) (A) (A)
(A) (A) (A) (A) (A) (A) (A) (A) (A) (A) (A) (A)
(A) (A) (A) (A) (A) (A) (A) (A) (A) (A) (A) (A)
(A) (A) (A) (A) (A) (A) (A) (A) (A) (A) (A) (A)
(A) (A) (A) (A) (A) (A) (A) (A) (A) (A) (A) (A)
(A) (A) (A) (A) (A) (A) (A) (A) (A) (A) (A) (A)
(A) (A) (A) (A) (A) (A) (A) (A) (A) (A) (A) (A)
(A) (A) (A) (A) (A) (A) (A) (A) (A) (A) (A) (A)
(A) (A) (A) (A) (A) (A) (A) (A) (A) (A) (A) (A)
(A) (A) (A) (A) (A) (A) (A) (A) (A) (A) (A) (A)
(A) (A) (A) (A) (A) (A) (A) (A) (A) (A) (A) (A)
(A) (A) (A) (A) (A) (A) (A) (A) (A) (A) (A) (A)
(A) (A) (A) (A) (A) (A)
400 initial guesses have been made.
Convergence on wavefunction: 0.001000000000000
Davidson Disk Diagonalization: ConvIn= 1.00D-03 SkipCon=T Conv= 1.00D-03.
Max sub-space: 6000 roots to seek: 400 dimension of matrix: 59280
Iteration 1 Dimension 400 NMult 0 NNew 400
CISAX will form 204 AO SS matrices at one time.
NMat= 204 NSing= 204 JSym2X= 0.
FoFJK: IHMeth= 1 ICntrl= 0 DoSepK=F KAlg= 0 I1Cent= 0 FoldK=F
IRaf= 870000000 NMat= 408 IRICut= 510 DoRegI=T DoRafI=T ISym2E= 0 IDoP0=3 IntGTp=3.
NMat= 196 NSing= 196 JSym2X= 0.
New state 2 was old state 6
New state 4 was old state 5
New state 5 was old state 7
New state 6 was old state 4
New state 7 was old state 12
New state 8 was old state 10
New state 9 was old state 8
New state 10 was old state 14
New state 11 was old state 13
New state 12 was old state 9
New state 13 was old state 11
New state 14 was old state 15
New state 15 was old state 22
New state 16 was old state 17
New state 17 was old state 23
New state 18 was old state 16
New state 19 was old state 18
New state 22 was old state 19
New state 23 was old state 28
New state 24 was old state 43
New state 26 was old state 24
New state 28 was old state 26
New state 29 was old state 33
New state 30 was old state 29
New state 31 was old state 30
New state 32 was old state 42
New state 33 was old state 35
New state 34 was old state 31
New state 35 was old state 34
New state 36 was old state 32
New state 37 was old state 39
New state 38 was old state 37
New state 39 was old state 36
New state 40 was old state 38
New state 42 was old state 40
New state 43 was old state 49
New state 44 was old state 46
New state 45 was old state 44
New state 46 was old state 47
New state 47 was old state 50
New state 48 was old state 45
New state 49 was old state 62
New state 50 was old state 55
New state 51 was old state 48
New state 53 was old state 56
New state 54 was old state 51
New state 55 was old state 54
New state 56 was old state 68
New state 57 was old state 53
New state 58 was old state 59
New state 59 was old state 60
New state 60 was old state 58
New state 61 was old state 71
New state 62 was old state 57
New state 63 was old state 70
New state 64 was old state 63
New state 65 was old state 61
New state 66 was old state 65
New state 67 was old state 64
New state 68 was old state 94
New state 69 was old state 66
New state 70 was old state 127
New state 71 was old state 69
New state 73 was old state 76
New state 74 was old state 73
New state 75 was old state 67
New state 76 was old state 74
New state 77 was old state 81
New state 78 was old state 75
New state 79 was old state 77
New state 80 was old state 79
New state 81 was old state 83
New state 82 was old state 78
New state 83 was old state 100
New state 84 was old state 80
New state 85 was old state 88
New state 86 was old state 91
New state 87 was old state 92
New state 88 was old state 89
New state 89 was old state 85
New state 90 was old state 86
New state 91 was old state 90
New state 92 was old state 87
New state 93 was old state 84
New state 94 was old state 97
New state 95 was old state 103
New state 96 was old state 95
New state 97 was old state 102
New state 99 was old state 93
New state 100 was old state 104
Excitation Energies [eV] at current iteration:
Root 1 : 6.016313937381001
Root 2 : 6.439003113834826
Root 3 : 6.490191489277142
Root 4 : 6.562778772572681
Root 5 : 6.594726521383177
Root 6 : 6.665988376543239
Root 7 : 6.801680422855177
Root 8 : 6.908207379975791
Root 9 : 6.960775363205797
Root 10 : 7.031040183688066
Root 11 : 7.047544157842628
Root 12 : 7.103533329520126
Root 13 : 7.145430464060606
Root 14 : 7.190540350371400
Root 15 : 7.227937308369123
Root 16 : 7.300920786871698
Root 17 : 7.320709180362337
Root 18 : 7.359771694041054
Root 19 : 7.369330293856327
Root 20 : 7.384703163806756
Root 21 : 7.443288219814372
Root 22 : 7.496172583850402
Root 23 : 7.524373286193712
Root 24 : 7.545435271212731
Root 25 : 7.591141108991226
Root 26 : 7.663092479070342
Root 27 : 7.674871002151393
Root 28 : 7.733144624750756
Root 29 : 7.736412392443380
Root 30 : 7.786360122175001
Root 31 : 7.789152985851774
Root 32 : 7.809691492224230
Root 33 : 7.815009561317913
Root 34 : 7.830658865215034
Root 35 : 7.847543603911893
Root 36 : 7.866287777122956
Root 37 : 7.877579469934975
Root 38 : 7.911272827467058
Root 39 : 7.938273528474936
Root 40 : 7.980004001911430
Root 41 : 7.985124727693999
Root 42 : 7.996935112180623
Root 43 : 8.020740856538854
Root 44 : 8.057161838518240
Root 45 : 8.087466043544602
Root 46 : 8.113639105998963
Root 47 : 8.148552658742405
Root 48 : 8.175243964478440
Root 49 : 8.193777936956776
Root 50 : 8.220587189417889
Root 51 : 8.239227850162759
Root 52 : 8.267508017104740
Root 53 : 8.277782890379918
Root 54 : 8.288279454999397
Root 55 : 8.311469456378740
Root 56 : 8.326378776037837
Root 57 : 8.338499807734815
Root 58 : 8.358973479774065
Root 59 : 8.365602067175411
Root 60 : 8.385300506810804
Root 61 : 8.394731883940555
Root 62 : 8.413287397812336
Root 63 : 8.433931688444206
Root 64 : 8.454581241059302
Root 65 : 8.479371776758812
Root 66 : 8.497066739929386
Root 67 : 8.503418215559332
Root 68 : 8.512699192412514
Root 69 : 8.514593233874010
Root 70 : 8.564663188772940
Root 71 : 8.569651804366554
Root 72 : 8.579410916106976
Root 73 : 8.605646346090870
Root 74 : 8.609568722887241
Root 75 : 8.617779351064273
Root 76 : 8.627488948379586
Root 77 : 8.641462945356009
Root 78 : 8.648008610306105
Root 79 : 8.655256054916284
Root 80 : 8.658155822339340
Root 81 : 8.665517591132025
Root 82 : 8.692742933651346
Root 83 : 8.710340726759153
Root 84 : 8.713196770144620
Root 85 : 8.734033314531111
Root 86 : 8.760988260052473
Root 87 : 8.776014289508355
Root 88 : 8.785692597032330
Root 89 : 8.790112021245182
Root 90 : 8.796670359273000
Root 91 : 8.820721200869746
Root 92 : 8.826375035066404
Root 93 : 8.836661065656042
Root 94 : 8.857387407471508
Root 95 : 8.866361546356240
Root 96 : 8.880892081398981
Root 97 : 8.897057373767984
Root 98 : 8.914469555451728
Root 99 : 8.917681440939466
Root 100 : 8.932893802924511
Root 101 : 8.944642057632947
Root 102 : 8.946482311985276
Root 103 : 8.963146561413149
Root 104 : 8.972238624215821
Root 105 : 8.981029572506323
Root 106 : 8.998966683799484
Root 107 : 9.020532051834333
Root 108 : 9.038732436793234
Root 109 : 9.057451209269216
Root 110 : 9.063338075324133
Root 111 : 9.072922467644675
Root 112 : 9.087412729996887
Root 113 : 9.102491559988367
Root 114 : 9.113394404178139
Root 115 : 9.118143926231934
Root 116 : 9.137044175622167
Root 117 : 9.139913237207537
Root 118 : 9.147481572938966
Root 119 : 9.162760493767280
Root 120 : 9.181236644481411
Root 121 : 9.185546748336520
Root 122 : 9.189184873784535
Root 123 : 9.199718395651191
Root 124 : 9.216718524890608
Root 125 : 9.221455909946778
Root 126 : 9.227633144911936
Root 127 : 9.239605318556807
Root 128 : 9.242597884296082
Root 129 : 9.250749621780406
Root 130 : 9.261190622057480
Root 131 : 9.273886498698815
Root 132 : 9.286239405930628
Root 133 : 9.296280649091351
Root 134 : 9.300730192849356
Root 135 : 9.311744849401041
Root 136 : 9.326684600280519
Root 137 : 9.343296471825171
Root 138 : 9.352519511388905
Root 139 : 9.356131822856042
Root 140 : 9.366003080995174
Root 141 : 9.370451095319389
Root 142 : 9.378213053464403
Root 143 : 9.383035302914827
Root 144 : 9.391704350346098
Root 145 : 9.416692242634273
Root 146 : 9.421996458058047
Root 147 : 9.427877622961496
Root 148 : 9.446758643608943
Root 149 : 9.453988905153125
Root 150 : 9.462818770080005
Root 151 : 9.468717920867970
Root 152 : 9.478039673488661
Root 153 : 9.487927608560421
Root 154 : 9.494548316012148
Root 155 : 9.500659799352691
Root 156 : 9.507949517916256
Root 157 : 9.513357478802904
Root 158 : 9.520253309291881
Root 159 : 9.531887332564697
Root 160 : 9.536003936041356
Root 161 : 9.543465711749754
Root 162 : 9.556994106910805
Root 163 : 9.559546363241987
Root 164 : 9.567260822054163
Root 165 : 9.573890553669528
Root 166 : 9.577480692674897
Root 167 : 9.582832415338952
Root 168 : 9.595360451917914
Root 169 : 9.603653943887482
Root 170 : 9.612408365270907
Root 171 : 9.630629086146747
Root 172 : 9.637536689732009
Root 173 : 9.642522893394016
Root 174 : 9.649264399322453
Root 175 : 9.658435672215480
Root 176 : 9.660057046593554
Root 177 : 9.666050813912591
Root 178 : 9.675620008728087
Root 179 : 9.684793646999552
Root 180 : 9.691314166805626
Root 181 : 9.706281617211673
Root 182 : 9.715612760620520
Root 183 : 9.719047211325712
Root 184 : 9.724705543451517
Root 185 : 9.735899648049092
Root 186 : 9.745261827877988
Root 187 : 9.748798937883537
Root 188 : 9.765700277487548
Root 189 : 9.771423377646416
Root 190 : 9.778014922768527
Root 191 : 9.781420829770932
Root 192 : 9.793637073049997
Root 193 : 9.797759111491166
Root 194 : 9.807459165419765
Root 195 : 9.810900571279140
Root 196 : 9.819580533786480
Root 197 : 9.826777589372130
Root 198 : 9.829141749275147
Root 199 : 9.838992442786418
Root 200 : 9.839976679937397
Root 201 : 9.844401315887421
Root 202 : 9.852852673622946
Root 203 : 9.854901696332316
Root 204 : 9.857393181346238
Root 205 : 9.866051827571889
Root 206 : 9.873317032568208
Root 207 : 9.880577784962725
Root 208 : 9.905068168942954
Root 209 : 9.911651734179479
Root 210 : 9.927057452282599
Root 211 : 9.929472886483826
Root 212 : 9.938490142433977
Root 213 : 9.950706363914719
Root 214 : 9.956802323325846
Root 215 : 9.971051768356881
Root 216 : 9.973713876621552
Root 217 : 9.982220228464483
Root 218 : 9.992942584503888
Root 219 : 9.999663744325600
Root 220 : 10.010193584052841
Root 221 : 10.014859823622215
Root 222 : 10.024233229756447
Root 223 : 10.032272502145171
Root 224 : 10.039331466526386
Root 225 : 10.040933845102860
Root 226 : 10.044800915860160
Root 227 : 10.064728748695268
Root 228 : 10.071785930824788
Root 229 : 10.077483800936198
Root 230 : 10.079444829391990
Root 231 : 10.090913826519088
Root 232 : 10.106982658403597
Root 233 : 10.112354213655573
Root 234 : 10.124853873431933
Root 235 : 10.136024266692354
Root 236 : 10.139334865684036
Root 237 : 10.145480964207607
Root 238 : 10.155344444090352
Root 239 : 10.162197528150585
Root 240 : 10.168133675749210
Root 241 : 10.178066000628487
Root 242 : 10.181083272550181
Root 243 : 10.182107616446299
Root 244 : 10.189936714176460
Root 245 : 10.198729400193487
Root 246 : 10.202397641070345
Root 247 : 10.211204730927701
Root 248 : 10.212358615263987
Root 249 : 10.215106096871507
Root 250 : 10.219219912867516
Root 251 : 10.222539956780095
Root 252 : 10.230957620014106
Root 253 : 10.234675569430417
Root 254 : 10.242286474564741
Root 255 : 10.245560097103867
Root 256 : 10.252643995749111
Root 257 : 10.257327613451702
Root 258 : 10.259266142099152
Root 259 : 10.264128790047808
Root 260 : 10.269163277693973
Root 261 : 10.279670248007996
Root 262 : 10.283093290376719
Root 263 : 10.283848320005772
Root 264 : 10.291588003196098
Root 265 : 10.302575975385578
Root 266 : 10.303212607913274
Root 267 : 10.313168152700463
Root 268 : 10.320681442203162
Root 269 : 10.322147401766705
Root 270 : 10.333406324909458
Root 271 : 10.343796555004065
Root 272 : 10.345926525234368
Root 273 : 10.348117778277411
Root 274 : 10.355868931697813
Root 275 : 10.362132618488454
Root 276 : 10.366563638711403
Root 277 : 10.375809341674012
Root 278 : 10.381159615946217
Root 279 : 10.383871195229235
Root 280 : 10.388595614397616
Root 281 : 10.394194567035660
Root 282 : 10.397240858783489
Root 283 : 10.404637365960561
Root 284 : 10.407631668397741
Root 285 : 10.413472245768720
Root 286 : 10.424612906267436
Root 287 : 10.431244009290786
Root 288 : 10.445241128808327
Root 289 : 10.452870312895554
Root 290 : 10.457614474802769
Root 291 : 10.465057131611651
Root 292 : 10.475326532976791
Root 293 : 10.480734541554295
Root 294 : 10.488378794532746
Root 295 : 10.499313461247727
Root 296 : 10.504655021813946
Root 297 : 10.511529377592213
Root 298 : 10.522279093857394
Root 299 : 10.528295385698888
Root 300 : 10.530797163568486
Root 301 : 10.537397643541782
Root 302 : 10.539472026428202
Root 303 : 10.543484601053462
Root 304 : 10.550917509651388
Root 305 : 10.556460629641302
Root 306 : 10.567115227045752
Root 307 : 10.568786260120259
Root 308 : 10.575294898075509
Root 309 : 10.579755352356740
Root 310 : 10.585958009324878
Root 311 : 10.593165281172148
Root 312 : 10.602769067214597
Root 313 : 10.609852345604738
Root 314 : 10.619043860362721
Root 315 : 10.620809240251868
Root 316 : 10.627837869698727
Root 317 : 10.630570086444807
Root 318 : 10.633271546317566
Root 319 : 10.643488124298747
Root 320 : 10.645517488760126
Root 321 : 10.652367236168216
Root 322 : 10.662519925889679
Root 323 : 10.666557380979221
Root 324 : 10.675069905763735
Root 325 : 10.677866148642329
Root 326 : 10.685534444819014
Root 327 : 10.691156589467797
Root 328 : 10.694787323376651
Root 329 : 10.703273625500527
Root 330 : 10.708465076438518
Root 331 : 10.711332968233634
Root 332 : 10.714054256575167
Root 333 : 10.724667942743590
Root 334 : 10.728603643767608
Root 335 : 10.736490478649264
Root 336 : 10.738740282192532
Root 337 : 10.744419773220994
Root 338 : 10.747904226344067
Root 339 : 10.754820814660841
Root 340 : 10.762495719802351
Root 341 : 10.769653201422809
Root 342 : 10.777949126588695
Root 343 : 10.783933218242760
Root 344 : 10.788451457256787
Root 345 : 10.791208752730364
Root 346 : 10.794328669263523
Root 347 : 10.802262843643609
Root 348 : 10.802972522534382
Root 349 : 10.810242866713509
Root 350 : 10.816439826977081
Root 351 : 10.819069470858167
Root 352 : 10.826061256643834
Root 353 : 10.832110678597731
Root 354 : 10.835311233994227
Root 355 : 10.838995892577886
Root 356 : 10.842002613883736
Root 357 : 10.845203266281315
Root 358 : 10.849107290895015
Root 359 : 10.851843603138457
Root 360 : 10.854531005936670
Root 361 : 10.857786312966281
Root 362 : 10.866915733338319
Root 363 : 10.869054408016821
Root 364 : 10.874236993469717
Root 365 : 10.880389325708229
Root 366 : 10.885632574279363
Root 367 : 10.886467624127381
Root 368 : 10.893314425118236
Root 369 : 10.898148053505428
Root 370 : 10.903289622048643
Root 371 : 10.908255462002264
Root 372 : 10.912078920006804
Root 373 : 10.918765794030769
Root 374 : 10.932577520296574
Root 375 : 10.936818375245828
Root 376 : 10.937260007115391
Root 377 : 10.951385592891903
Root 378 : 10.957931956163371
Root 379 : 10.964581451904348
Root 380 : 10.970133887874484
Root 381 : 10.972403923821208
Root 382 : 10.979463589620565
Root 383 : 10.984861412250231
Root 384 : 10.996112436708477
Root 385 : 11.007096709033556
Root 386 : 11.009516093630523
Root 387 : 11.015821979354204
Root 388 : 11.024828425932276
Root 389 : 11.030099539069147
Root 390 : 11.033309161057568
Root 391 : 11.041951003577356
Root 392 : 11.048522876528905
Root 393 : 11.052422157070062
Root 394 : 11.064922999605164
Root 395 : 11.080974443615478
Root 396 : 11.086705047223765
Root 397 : 11.087532563345247
Root 398 : 11.114217286191534
Root 399 : 11.120479702843445
Root 400 : 11.128468960741587
Iteration 2 Dimension 600 NMult 400 NNew 200
CISAX will form 200 AO SS matrices at one time.
NMat= 200 NSing= 200 JSym2X= 0.
Root 1 not converged, maximum delta is 0.161862749039030
Root 2 not converged, maximum delta is 0.336460724960781
Root 3 not converged, maximum delta is 0.477208226538644
Root 4 not converged, maximum delta is 0.597432159691106
Root 5 not converged, maximum delta is 0.126027016809763
Root 6 not converged, maximum delta is 0.455467334085495
Root 7 not converged, maximum delta is 0.420938861217617
Root 8 not converged, maximum delta is 0.043461184271582
Root 9 not converged, maximum delta is 0.071817323968933
New state 10 was old state 11
Root 10 not converged, maximum delta is 0.194031444747082
New state 11 was old state 10
Root 11 not converged, maximum delta is 0.068235286924703
Root 12 not converged, maximum delta is 0.187864810122777
Root 13 not converged, maximum delta is 0.141542663358080
Root 14 not converged, maximum delta is 0.300057310137355
Root 15 not converged, maximum delta is 0.230866688311869
New state 16 was old state 20
Root 16 not converged, maximum delta is 0.354266974115110
New state 17 was old state 16
Root 17 not converged, maximum delta is 0.198086384120492
New state 18 was old state 17
Root 18 not converged, maximum delta is 0.194717793560523
Root 19 not converged, maximum delta is 0.246600172574802
New state 20 was old state 18
Root 20 not converged, maximum delta is 0.289528175220903
Root 21 not converged, maximum delta is 0.296076593968286
New state 22 was old state 23
Root 22 not converged, maximum delta is 0.417189451530969
New state 23 was old state 22
Root 23 not converged, maximum delta is 0.349606610396869
Root 24 not converged, maximum delta is 0.126818021725134
Root 25 not converged, maximum delta is 0.058827240850126
Root 26 not converged, maximum delta is 0.102635797601698
Root 27 not converged, maximum delta is 0.065495723523974
Root 28 not converged, maximum delta is 0.194382369865616
Root 29 not converged, maximum delta is 0.122456566779536
Root 30 not converged, maximum delta is 0.167695333400243
Root 31 not converged, maximum delta is 0.205645029050619
Root 32 not converged, maximum delta is 0.186788967915745
Root 33 not converged, maximum delta is 0.162291459694868
Root 34 not converged, maximum delta is 0.110009536879490
Root 35 not converged, maximum delta is 0.174066788512759
Root 36 not converged, maximum delta is 0.261660064049880
Root 37 not converged, maximum delta is 0.208071749107049
Root 38 not converged, maximum delta is 0.028950507003428
Root 39 not converged, maximum delta is 0.089732286717321
Root 40 not converged, maximum delta is 0.213851717368097
New state 41 was old state 42
Root 41 not converged, maximum delta is 0.417342736646831
New state 42 was old state 41
Root 42 not converged, maximum delta is 0.257418678494212
Root 43 not converged, maximum delta is 0.294746079581969
Root 44 not converged, maximum delta is 0.351842667023655
Root 45 not converged, maximum delta is 0.167315039706030
Root 46 not converged, maximum delta is 0.150985062204637
Root 47 not converged, maximum delta is 0.084766028772926
Root 48 not converged, maximum delta is 0.100469412660277
Root 49 not converged, maximum delta is 0.062754010571955
Root 50 not converged, maximum delta is 0.047638658045974
Root 51 not converged, maximum delta is 0.082636427720675
Root 52 not converged, maximum delta is 0.113159556789683
Root 53 not converged, maximum delta is 0.274866062926828
Root 54 not converged, maximum delta is 0.130102971132322
Root 55 not converged, maximum delta is 0.305822384136506
Root 56 not converged, maximum delta is 0.287961051971677
Root 57 not converged, maximum delta is 0.252979567397673
Root 58 not converged, maximum delta is 0.145711924264990
Root 59 not converged, maximum delta is 0.061645954025405
Root 60 not converged, maximum delta is 0.069582532968083
Root 61 not converged, maximum delta is 0.135751199913777
Root 62 not converged, maximum delta is 0.252855135141576
Root 63 not converged, maximum delta is 0.189740376402139
Root 64 not converged, maximum delta is 0.130419424147006
Root 65 not converged, maximum delta is 0.106714601834666
Root 66 not converged, maximum delta is 0.156857522060486
Root 67 not converged, maximum delta is 0.280512193991948
Root 68 not converged, maximum delta is 0.254545475646707
Root 69 not converged, maximum delta is 0.220311238024910
Root 70 not converged, maximum delta is 0.154348133778468
Root 71 not converged, maximum delta is 0.203892321881603
Root 72 not converged, maximum delta is 0.133930184821711
Root 73 not converged, maximum delta is 0.146332692768686
Root 74 not converged, maximum delta is 0.228744370414643
Root 75 not converged, maximum delta is 0.175855855484087
New state 76 was old state 77
Root 76 not converged, maximum delta is 0.339196668995316
New state 77 was old state 76
Root 77 not converged, maximum delta is 0.192842739490041
Root 78 not converged, maximum delta is 0.200841381304561
New state 79 was old state 80
Root 79 not converged, maximum delta is 0.221226264919461
New state 80 was old state 79
Root 80 not converged, maximum delta is 0.213233903266796
Root 81 not converged, maximum delta is 0.213762781981682
Root 82 not converged, maximum delta is 0.088600043880735
Root 83 not converged, maximum delta is 0.071407508510497
Root 84 not converged, maximum delta is 0.070619669094712
Root 85 not converged, maximum delta is 0.060243782400477
Root 86 not converged, maximum delta is 0.068753119991133
Root 87 not converged, maximum delta is 0.166045091796073
Root 88 not converged, maximum delta is 0.293813361198584
Root 89 not converged, maximum delta is 0.389475092327303
Root 90 not converged, maximum delta is 0.302565493188281
Root 91 not converged, maximum delta is 0.087035439212117
Root 92 not converged, maximum delta is 0.147489032085022
Root 93 not converged, maximum delta is 0.131843820715679
Root 94 not converged, maximum delta is 0.256361323341659
Root 95 not converged, maximum delta is 0.300020679025659
Root 96 not converged, maximum delta is 0.195653592605296
Root 97 not converged, maximum delta is 0.146426956859013
Root 98 not converged, maximum delta is 0.318098542965049
Root 99 not converged, maximum delta is 0.078713330186391
Root 100 not converged, maximum delta is 0.272502887570230
Excitation Energies [eV] at current iteration:
Root 1 : 5.930035113592492 Change is -0.086278823788509
Root 2 : 6.360945075842057 Change is -0.078058037992769
Root 3 : 6.434416501770840 Change is -0.055774987506301
Root 4 : 6.477789496320036 Change is -0.084989276252645
Root 5 : 6.560318088433554 Change is -0.034408432949622
Root 6 : 6.622927866308276 Change is -0.043060510234962
Root 7 : 6.681202698226241 Change is -0.120477724628936
Root 8 : 6.876964997332888 Change is -0.031242382642903
Root 9 : 6.947507037192901 Change is -0.013268326012895
Root 10 : 6.970157745330807 Change is -0.077386412511821
Root 11 : 7.005857312574993 Change is -0.025182871113074
Root 12 : 7.083098535891010 Change is -0.020434793629116
Root 13 : 7.125827220425503 Change is -0.019603243635103
Root 14 : 7.159175957741807 Change is -0.031364392629593
Root 15 : 7.184070730797928 Change is -0.043866577571195
Root 16 : 7.250244817121542 Change is -0.134458346685214
Root 17 : 7.271752032677388 Change is -0.029168754194310
Root 18 : 7.301979403443855 Change is -0.018729776918481
Root 19 : 7.342088063618701 Change is -0.027242230237626
Root 20 : 7.352792356188355 Change is -0.006979337852699
Root 21 : 7.416012376735018 Change is -0.027275843079354
Root 22 : 7.429965599889178 Change is -0.094407686304535
Root 23 : 7.488351112442994 Change is -0.007821471407408
Root 24 : 7.510579350866186 Change is -0.034855920346545
Root 25 : 7.568050958154640 Change is -0.023090150836586
Root 26 : 7.630758133864353 Change is -0.032334345205990
Root 27 : 7.652645141944974 Change is -0.022225860206420
Root 28 : 7.711397222524131 Change is -0.021747402226625
Root 29 : 7.718660491357214 Change is -0.017751901086165
Root 30 : 7.764036755048080 Change is -0.022323367126921
Root 31 : 7.769573293026683 Change is -0.019579692825091
Root 32 : 7.780800413748635 Change is -0.028891078475595
Root 33 : 7.785418176600978 Change is -0.029591384716934
Root 34 : 7.815195521507992 Change is -0.015463343707043
Root 35 : 7.827077427920905 Change is -0.020466175990987
Root 36 : 7.841280257779487 Change is -0.025007519343468
Root 37 : 7.850369534354841 Change is -0.027209935580134
Root 38 : 7.893452412107035 Change is -0.017820415360023
Root 39 : 7.919507683441620 Change is -0.018765845033315
Root 40 : 7.945835663676333 Change is -0.034168338235098
Root 41 : 7.961045508606261 Change is -0.035889603574362
Root 42 : 7.965224625423639 Change is -0.019900102270360
Root 43 : 7.981989811807169 Change is -0.038751044731685
Root 44 : 8.006239086791451 Change is -0.050922751726790
Root 45 : 8.056003178156510 Change is -0.031462865388090
Root 46 : 8.090337123059442 Change is -0.023301982939521
Root 47 : 8.119850466413428 Change is -0.028702192328976
Root 48 : 8.155138148204628 Change is -0.020105816273812
Root 49 : 8.173673405295055 Change is -0.020104531661719
Root 50 : 8.201079814296953 Change is -0.019507375120936
Root 51 : 8.216680632702383 Change is -0.022547217460375
Root 52 : 8.243924206567570 Change is -0.023583810537171
Root 53 : 8.260115296912135 Change is -0.017667593467783
Root 54 : 8.267496697323773 Change is -0.020782757675625
Root 55 : 8.281647997382212 Change is -0.029821458996528
Root 56 : 8.297630825439599 Change is -0.028747950598237
Root 57 : 8.312021491698772 Change is -0.026478316036043
Root 58 : 8.331698218819581 Change is -0.027275260954484
Root 59 : 8.344622696747102 Change is -0.020979370428308
Root 60 : 8.366825533197941 Change is -0.018474973612862
Root 61 : 8.370511592034811 Change is -0.024220291905745
Root 62 : 8.384248044285666 Change is -0.029039353526670
Root 63 : 8.403865929812731 Change is -0.030065758631476
Root 64 : 8.429403244915804 Change is -0.025177996143498
Root 65 : 8.457975781099934 Change is -0.021395995658878
Root 66 : 8.475342772443405 Change is -0.021723967485981
Root 67 : 8.479522590125127 Change is -0.023895625434205
Root 68 : 8.485064050987042 Change is -0.027635141425472
Root 69 : 8.488571548077712 Change is -0.026021685796298
Root 70 : 8.506335525720527 Change is -0.058327663052413
Root 71 : 8.538120660281276 Change is -0.031531144085279
Root 72 : 8.546890768726497 Change is -0.032520147380480
Root 73 : 8.573992799225129 Change is -0.031653546865742
Root 74 : 8.579039828368494 Change is -0.030528894518747
Root 75 : 8.594357993611084 Change is -0.023421357453190
Root 76 : 8.600341560207983 Change is -0.041121385148026
Root 77 : 8.607434049855424 Change is -0.020054898524160
Root 78 : 8.627016131088206 Change is -0.020992479217900
Root 79 : 8.630594114959557 Change is -0.027561707379785
Root 80 : 8.633437848394371 Change is -0.021818206521914
Root 81 : 8.640533614939113 Change is -0.024983976192912
Root 82 : 8.661654359341677 Change is -0.031088574309668
Root 83 : 8.681102730022968 Change is -0.029237996736184
Root 84 : 8.685367275245408 Change is -0.027829494899212
Root 85 : 8.704780472628538 Change is -0.029252841902571
Root 86 : 8.731030270343730 Change is -0.029957989708743
Root 87 : 8.739691407472060 Change is -0.036322882036296
Root 88 : 8.756061418326620 Change is -0.029631178705710
Root 89 : 8.766271656518276 Change is -0.023840364726907
Root 90 : 8.769966109628617 Change is -0.026704249644382
Root 91 : 8.799860157217710 Change is -0.020861043652037
Root 92 : 8.804816159199515 Change is -0.021558875866889
Root 93 : 8.819232588242642 Change is -0.017428477413400
Root 94 : 8.832556388227351 Change is -0.024831019244158
Root 95 : 8.841401371849143 Change is -0.024960174507097
Root 96 : 8.855811252765422 Change is -0.025080828633558
Root 97 : 8.867610207957338 Change is -0.029447165810646
Root 98 : 8.882156193157861 Change is -0.032313362293865
Root 99 : 8.896729854589752 Change is -0.020951586349714
Root 100 : 8.910534568658218 Change is -0.022359234266293
Iteration 3 Dimension 800 NMult 600 NNew 200
CISAX will form 200 AO SS matrices at one time.
NMat= 200 NSing= 200 JSym2X= 0.
Root 1 not converged, maximum delta is 0.003639608085565
Root 2 not converged, maximum delta is 0.010331634099654
Root 3 not converged, maximum delta is 0.010804099470335
Root 4 not converged, maximum delta is 0.006935581739249
Root 5 not converged, maximum delta is 0.001344494075130
Root 6 not converged, maximum delta is 0.005364057579621
Root 7 not converged, maximum delta is 0.004650892181918
Root 8 has converged.
Root 9 not converged, maximum delta is 0.001727766055683
Root 10 not converged, maximum delta is 0.002090918007747
Root 11 not converged, maximum delta is 0.001434721904332
Root 12 not converged, maximum delta is 0.002487618220458
Root 13 not converged, maximum delta is 0.003266759991188
Root 14 not converged, maximum delta is 0.004513191412505
Root 15 not converged, maximum delta is 0.003882075507281
Root 16 not converged, maximum delta is 0.003727174589603
Root 17 not converged, maximum delta is 0.001783911791629
Root 18 not converged, maximum delta is 0.002219298819300
Root 19 not converged, maximum delta is 0.002345021438667
Root 20 not converged, maximum delta is 0.002029844836224
Root 21 not converged, maximum delta is 0.008025023736589
Root 22 not converged, maximum delta is 0.007385479279872
Root 23 not converged, maximum delta is 0.003302943913380
Root 24 not converged, maximum delta is 0.003252939450171
Root 25 has converged.
Root 26 not converged, maximum delta is 0.001778352207520
Root 27 not converged, maximum delta is 0.001735169255453
Root 28 has converged.
Root 29 has converged.
Root 30 not converged, maximum delta is 0.010275624697367
Root 31 not converged, maximum delta is 0.014672505825478
Root 32 not converged, maximum delta is 0.009295402812430
Root 33 not converged, maximum delta is 0.005179721900908
Root 34 not converged, maximum delta is 0.004801484425672
Root 35 not converged, maximum delta is 0.004548553792334
Root 36 not converged, maximum delta is 0.007176401919230
Root 37 not converged, maximum delta is 0.006057249736024
Root 38 has converged.
Root 39 not converged, maximum delta is 0.004001837821682
Root 40 not converged, maximum delta is 0.005896660023712
Root 41 not converged, maximum delta is 0.014701239683977
Root 42 not converged, maximum delta is 0.014385035598218
Root 43 not converged, maximum delta is 0.003038903118344
Root 44 not converged, maximum delta is 0.003096154562254
Root 45 not converged, maximum delta is 0.001951192280536
Root 46 not converged, maximum delta is 0.001383333289882
Root 47 not converged, maximum delta is 0.002137940046157
Root 48 not converged, maximum delta is 0.001981294347522
Root 49 not converged, maximum delta is 0.001295546849670
Root 50 not converged, maximum delta is 0.001034741359190
Root 51 not converged, maximum delta is 0.002553590334445
Root 52 not converged, maximum delta is 0.002894185355216
Root 53 not converged, maximum delta is 0.005395306903255
Root 54 not converged, maximum delta is 0.002675686079024
Root 55 not converged, maximum delta is 0.005223354582195
Root 56 not converged, maximum delta is 0.007064444771565
Root 57 not converged, maximum delta is 0.003394872896550
Root 58 not converged, maximum delta is 0.002748049741115
Root 59 not converged, maximum delta is 0.001769531409771
Root 60 not converged, maximum delta is 0.010134800815476
Root 61 not converged, maximum delta is 0.014664350153910
Root 62 not converged, maximum delta is 0.005629352204498
Root 63 not converged, maximum delta is 0.005690619548930
Root 64 not converged, maximum delta is 0.002779520347681
Root 65 not converged, maximum delta is 0.004156465908219
Root 66 not converged, maximum delta is 0.007107120233809
Root 67 not converged, maximum delta is 0.016296940710367
Root 68 not converged, maximum delta is 0.020418512456086
Root 69 not converged, maximum delta is 0.008240829246586
Root 70 not converged, maximum delta is 0.008715583627437
Root 71 not converged, maximum delta is 0.003124565680671
Root 72 not converged, maximum delta is 0.002932549384274
Root 73 not converged, maximum delta is 0.006823975347570
Root 74 not converged, maximum delta is 0.006270485148719
Root 75 not converged, maximum delta is 0.003882541172404
Root 76 not converged, maximum delta is 0.012061212276739
Root 77 not converged, maximum delta is 0.007717209630545
Root 78 not converged, maximum delta is 0.003181966437437
Root 79 not converged, maximum delta is 0.004045779727465
Root 80 not converged, maximum delta is 0.004385199759571
Root 81 not converged, maximum delta is 0.004691074713504
Root 82 not converged, maximum delta is 0.003796618708380
Root 83 not converged, maximum delta is 0.003468675408993
Root 84 not converged, maximum delta is 0.004158029290979
Root 85 not converged, maximum delta is 0.002338558421771
Root 86 not converged, maximum delta is 0.003053637351691
Root 87 not converged, maximum delta is 0.007256276131932
Root 88 not converged, maximum delta is 0.006788818279577
Root 89 not converged, maximum delta is 0.008028167144273
Root 90 not converged, maximum delta is 0.007136842448126
Root 91 not converged, maximum delta is 0.004156717864177
Root 92 not converged, maximum delta is 0.010949813792643
Root 93 not converged, maximum delta is 0.011408652060773
Root 94 not converged, maximum delta is 0.023923782618609
Root 95 not converged, maximum delta is 0.019945305696503
Root 96 not converged, maximum delta is 0.022921965905805
Root 97 not converged, maximum delta is 0.017664125049814
Root 98 not converged, maximum delta is 0.044765795843570
Root 99 not converged, maximum delta is 0.016274184817677
Root 100 not converged, maximum delta is 0.090746524903127
Excitation Energies [eV] at current iteration:
Root 1 : 5.928008806526276 Change is -0.002026307066215
Root 2 : 6.358370317488918 Change is -0.002574758353139
Root 3 : 6.433144534969344 Change is -0.001271966801496
Root 4 : 6.476828251445022 Change is -0.000961244875015
Root 5 : 6.559703645124054 Change is -0.000614443309500
Root 6 : 6.622094076415022 Change is -0.000833789893254
Root 7 : 6.680417104001023 Change is -0.000785594225218
Root 8 : 6.876346998303625 Change is -0.000617999029264
Root 9 : 6.947253434107965 Change is -0.000253603084936
Root 10 : 6.968958565735702 Change is -0.001199179595106
Root 11 : 7.005279174057413 Change is -0.000578138517580
Root 12 : 7.082780092178794 Change is -0.000318443712217
Root 13 : 7.125423167506068 Change is -0.000404052919435
Root 14 : 7.158602556849021 Change is -0.000573400892786
Root 15 : 7.183395692259870 Change is -0.000675038538058
Root 16 : 7.248939486793200 Change is -0.001305330328342
Root 17 : 7.271073346096349 Change is -0.000678686581039
Root 18 : 7.301509930249069 Change is -0.000469473194786
Root 19 : 7.341634834942711 Change is -0.000453228675989
Root 20 : 7.352406549099513 Change is -0.000385807088843
Root 21 : 7.415395202983371 Change is -0.000617173751647
Root 22 : 7.429122518041126 Change is -0.000843081848052
Root 23 : 7.487970759600160 Change is -0.000380352842835
Root 24 : 7.509995834734878 Change is -0.000583516131308
Root 25 : 7.567641275812584 Change is -0.000409682342057
Root 26 : 7.630285329999926 Change is -0.000472803864426
Root 27 : 7.652251960646293 Change is -0.000393181298681
Root 28 : 7.711038516383740 Change is -0.000358706140390
Root 29 : 7.718302553270258 Change is -0.000357938086956
Root 30 : 7.763582085226810 Change is -0.000454669821270
Root 31 : 7.769071828505013 Change is -0.000501464521670
Root 32 : 7.780240615182392 Change is -0.000559798566243
Root 33 : 7.784827728232882 Change is -0.000590448368097
Root 34 : 7.814836324657549 Change is -0.000359196850443
Root 35 : 7.826664454467441 Change is -0.000412973453465
Root 36 : 7.840744961623295 Change is -0.000535296156193
Root 37 : 7.849868700588250 Change is -0.000500833766590
Root 38 : 7.893110828013729 Change is -0.000341584093306
Root 39 : 7.919065984476751 Change is -0.000441698964869
Root 40 : 7.945048927257014 Change is -0.000786736419318
Root 41 : 7.960340171752313 Change is -0.000705336853948
Root 42 : 7.964732294451788 Change is -0.000492330971851
Root 43 : 7.981315729522348 Change is -0.000674082284821
Root 44 : 8.005575494512412 Change is -0.000663592279039
Root 45 : 8.055331858735045 Change is -0.000671319421466
Root 46 : 8.089895961563744 Change is -0.000441161495697
Root 47 : 8.119304456612307 Change is -0.000546009801120
Root 48 : 8.154697198989247 Change is -0.000440949215381
Root 49 : 8.173196191526065 Change is -0.000477213768991
Root 50 : 8.200707918178443 Change is -0.000371896118510
Root 51 : 8.216145433897603 Change is -0.000535198804781
Root 52 : 8.243442649718983 Change is -0.000481556848587
Root 53 : 8.259769888608098 Change is -0.000345408304036
Root 54 : 8.267169289335387 Change is -0.000327407988385
Root 55 : 8.280651408672595 Change is -0.000996588709617
Root 56 : 8.297107151886022 Change is -0.000523673553576
Root 57 : 8.311455265371045 Change is -0.000566226327727
Root 58 : 8.331162873838144 Change is -0.000535344981437
Root 59 : 8.344196057806649 Change is -0.000426638940453
Root 60 : 8.366379352220090 Change is -0.000446180977852
Root 61 : 8.369921270099725 Change is -0.000590321935084
Root 62 : 8.383512244976327 Change is -0.000735799309341
Root 63 : 8.403278336801646 Change is -0.000587593011084
Root 64 : 8.428861592223157 Change is -0.000541652692645
Root 65 : 8.457473001884946 Change is -0.000502779214989
Root 66 : 8.474889310230402 Change is -0.000453462213003
Root 67 : 8.478868871905505 Change is -0.000653718219623
Root 68 : 8.484294664718814 Change is -0.000769386268229
Root 69 : 8.487964720686753 Change is -0.000606827390959
Root 70 : 8.505080714551873 Change is -0.001254811168653
Root 71 : 8.537377191999200 Change is -0.000743468282075
Root 72 : 8.546141835549079 Change is -0.000748933177418
Root 73 : 8.573062247606694 Change is -0.000930551618433
Root 74 : 8.578336269248608 Change is -0.000703559119887
Root 75 : 8.593806611342959 Change is -0.000551382268124
Root 76 : 8.599568718421219 Change is -0.000772841786765
Root 77 : 8.606870611605244 Change is -0.000563438250181
Root 78 : 8.626487364001742 Change is -0.000528767086463
Root 79 : 8.629981070618326 Change is -0.000613044341230
Root 80 : 8.633002218237026 Change is -0.000435630157346
Root 81 : 8.640038436567307 Change is -0.000495178371805
Root 82 : 8.660922338853871 Change is -0.000732020487805
Root 83 : 8.680360674005835 Change is -0.000742056017133
Root 84 : 8.684547130777975 Change is -0.000820144467433
Root 85 : 8.704118347534017 Change is -0.000662125094521
Root 86 : 8.730332578526939 Change is -0.000697691816791
Root 87 : 8.738347586065698 Change is -0.001343821406361
Root 88 : 8.755238249857376 Change is -0.000823168469244
Root 89 : 8.765722999070046 Change is -0.000548657448229
Root 90 : 8.769237014489315 Change is -0.000729095139302
Root 91 : 8.799279042489744 Change is -0.000581114727966
Root 92 : 8.804063525295813 Change is -0.000752633903701
Root 93 : 8.818710638333366 Change is -0.000521949909277
Root 94 : 8.830959429051006 Change is -0.001596959176344
Root 95 : 8.840588118645554 Change is -0.000813253203587
Root 96 : 8.854596120885072 Change is -0.001215131880350
Root 97 : 8.866498010867403 Change is -0.001112197089936
Root 98 : 8.880297925209268 Change is -0.001858267948595
Root 99 : 8.895812780591175 Change is -0.000917073998577
Root 100 : 8.908181918068879 Change is -0.002352650589339
Iteration 4 Dimension 990 NMult 800 NNew 190
CISAX will form 190 AO SS matrices at one time.
NMat= 190 NSing= 190 JSym2X= 0.
Root 1 has converged.
Root 2 has converged.
Root 3 has converged.
Root 4 has converged.
Root 5 has converged.
Root 6 has converged.
Root 7 has converged.
Root 8 has converged.
Root 9 has converged.
Root 10 has converged.
Root 11 has converged.
Root 12 has converged.
Root 13 has converged.
Root 14 has converged.
Root 15 has converged.
Root 16 has converged.
Root 17 has converged.
Root 18 has converged.
Root 19 has converged.
Root 20 has converged.
Root 21 has converged.
Root 22 has converged.
Root 23 has converged.
Root 24 has converged.
Root 25 has converged.
Root 26 has converged.
Root 27 has converged.
Root 28 has converged.
Root 29 has converged.
Root 30 has converged.
Root 31 not converged, maximum delta is 0.001120156667632
Root 32 has converged.
Root 33 has converged.
Root 34 has converged.
Root 35 has converged.
Root 36 has converged.
Root 37 has converged.
Root 38 has converged.
Root 39 has converged.
Root 40 has converged.
Root 41 has converged.
Root 42 has converged.
Root 43 has converged.
Root 44 has converged.
Root 45 has converged.
Root 46 has converged.
Root 47 has converged.
Root 48 has converged.
Root 49 has converged.
Root 50 has converged.
Root 51 has converged.
Root 52 has converged.
Root 53 has converged.
Root 54 has converged.
Root 55 has converged.
Root 56 has converged.
Root 57 has converged.
Root 58 has converged.
Root 59 has converged.
Root 60 has converged.
Root 61 not converged, maximum delta is 0.001327798312236
Root 62 has converged.
Root 63 has converged.
Root 64 has converged.
Root 65 has converged.
Root 66 has converged.
Root 67 not converged, maximum delta is 0.001345474441527
Root 68 not converged, maximum delta is 0.001657648440586
Root 69 has converged.
Root 70 has converged.
Root 71 has converged.
Root 72 has converged.
Root 73 has converged.
Root 74 has converged.
Root 75 has converged.
Root 76 has converged.
Root 77 has converged.
Root 78 has converged.
Root 79 has converged.
Root 80 has converged.
[truncated: 3,010 more rows]

## Sheet: 4-CONF_2_ecd
Entering Gaussian System, Link 0=g16
Input=CONF_2_ecd.com
Output=CONF_2_ecd.log
Initial command:
/public/apps/g16/l1.exe "scr.148.master/Gau-20081.inp" -scrdir="scr.148.master/"
Default is to use a total of 12 processors:
12 via shared-memory
1 via Linda
Entering Link 1 = /public/apps/g16/l1.exe PID= 20082.
Copyright (c) 1988-2019, Gaussian, Inc. All Rights Reserved.
This is part of the Gaussian(R) 16 program. It is based on
the Gaussian(R) 09 system (copyright 2009, Gaussian, Inc.),
the Gaussian(R) 03 system (copyright 2003, Gaussian, Inc.),
the Gaussian(R) 98 system (copyright 1998, Gaussian, Inc.),
the Gaussian(R) 94 system (copyright 1995, Gaussian, Inc.),
the Gaussian 92(TM) system (copyright 1992, Gaussian, Inc.),
the Gaussian 90(TM) system (copyright 1990, Gaussian, Inc.),
the Gaussian 88(TM) system (copyright 1988, Gaussian, Inc.),
the Gaussian 86(TM) system (copyright 1986, Carnegie Mellon
University), and the Gaussian 82(TM) system (copyright 1983,
Carnegie Mellon University). Gaussian is a federally registered
trademark of Gaussian, Inc.
This software contains proprietary and confidential information,
including trade secrets, belonging to Gaussian, Inc.
This software is provided under written license and may be
used, copied, transmitted, or stored only in accord with that
written license.
The following legend is applicable only to US Government
contracts under FAR:
RESTRICTED RIGHTS LEGEND
Use, reproduction and disclosure by the US Government is
subject to restrictions as set forth in subparagraphs (a)
and (c) of the Commercial Computer Software - Restricted
Rights clause in FAR 52.227-19.
Gaussian, Inc.
340 Quinnipiac St., Bldg. 40, Wallingford CT 06492
---------------------------------------------------------------
Warning -- This program may not be used in any manner that
competes with the business of Gaussian, Inc. or will provide
assistance to any competitor of Gaussian, Inc. The licensee
of this program is prohibited from giving any competitor of
Gaussian, Inc. access to this program. By using this program,
the user acknowledges that Gaussian, Inc. is engaged in the
business of creating and licensing software in the field of
computational chemistry and represents and warrants to the
licensee that it is not a competitor of Gaussian, Inc. and that
it will not use this program in any manner prohibited above.
---------------------------------------------------------------
Cite this work as:
Gaussian 16, Revision C.01,
M. J. Frisch, G. W. Trucks, H. B. Schlegel, G. E. Scuseria,
M. A. Robb, J. R. Cheeseman, G. Scalmani, V. Barone,
G. A. Petersson, H. Nakatsuji, X. Li, M. Caricato, A. V. Marenich,
J. Bloino, B. G. Janesko, R. Gomperts, B. Mennucci, H. P. Hratchian,
J. V. Ortiz, A. F. Izmaylov, J. L. Sonnenberg, D. Williams-Young,
F. Ding, F. Lipparini, F. Egidi, J. Goings, B. Peng, A. Petrone,
T. Henderson, D. Ranasinghe, V. G. Zakrzewski, J. Gao, N. Rega,
G. Zheng, W. Liang, M. Hada, M. Ehara, K. Toyota, R. Fukuda,
J. Hasegawa, M. Ishida, T. Nakajima, Y. Honda, O. Kitao, H. Nakai,
T. Vreven, K. Throssell, J. A. Montgomery, Jr., J. E. Peralta,
F. Ogliaro, M. J. Bearpark, J. J. Heyd, E. N. Brothers, K. N. Kudin,
V. N. Staroverov, T. A. Keith, R. Kobayashi, J. Normand,
K. Raghavachari, A. P. Rendell, J. C. Burant, S. S. Iyengar,
J. Tomasi, M. Cossi, J. M. Millam, M. Klene, C. Adamo, R. Cammi,
J. W. Ochterski, R. L. Martin, K. Morokuma, O. Farkas,
J. B. Foresman, and D. J. Fox, Gaussian, Inc., Wallingford CT, 2019.
******************************************
Gaussian 16: ES64L-G16RevC.01 3-Jul-2019
20-May-2020
******************************************
%oldchk=CONF_2_min.chk
%chk=CONF_2_ecd.chk
Copying data from "CONF_2_min.chk" to current chk file "CONF_2_ecd.chk"
IOpt= 2 FromEx=T IUOpen= 4 IOptOp= 5 NList= 0 IFRang= 0 IUIn= 4 IUOut= 2.
----------------------------------------------------------------------
#P td=(nstates=100) APFD/6-311+g(2d,p) guess=read geom=allcheck integr
al(ultrafinegrid) scrf=check
----------------------------------------------------------------------
1/29=7,38=1,40=1,172=1/1;
2/12=2,40=1/2;
3/5=4,6=6,7=112,11=9,14=-4,25=1,30=1,70=2,74=-44,75=-5,116=-2/1,2,3,8;
4/5=1/1;
5/5=2,38=6/2;
8/6=1,10=2,108=100/1;
9/41=100,42=1,70=2/14;
6/7=2,8=2,9=2,10=2/1;
99/5=1,9=1/99;
Leave Link 1 at Wed May 20 07:56:04 2020, MaxMem= 3221225472 cpu: 1.1 elap: 0.1
(Enter /public/apps/g16/l101.exe)
Structure from the checkpoint file: "CONF_2_ecd.chk"
-----
*****
-----
Charge = 0 Multiplicity = 1
Redundant internal coordinates found in file. (old form).
C,0,3.421586093,-0.1383856851,-0.2454351657
C,0,2.9634702592,1.2783705812,-0.5642914406
C,0,1.5983014503,1.632359517,0.022125844
C,0,0.5922623523,0.5267480483,-0.3597949401
C,0,1.0253450001,-0.9145152958,0.0025733179
C,0,2.3796360341,-1.1649354062,-0.6705604856
C,0,-0.8166151581,0.789062901,0.0997419795
C,0,-1.7376842923,-0.1645170199,0.2703517285
C,0,-1.414656798,-1.6141025936,0.0382715804
C,0,-0.0458363002,-1.8327953409,-0.6034570059
C,0,-3.151020672,0.1966312516,0.6530359365
C,0,-3.7430847984,-0.702183643,1.7359051927
O,0,1.7748664321,1.7343835944,1.4431288388
C,0,1.1639788889,2.9899542669,-0.5322364405
O,0,2.8087870718,-2.4981186385,-0.3788996419
C,0,-4.0416934579,0.1626292318,-0.5934643592
C,0,1.1117912673,-1.1825541234,1.5105410396
O,0,-3.5877903912,1.0428906978,-1.6139024839
H,0,4.3634390274,-0.3468789946,-0.7659417683
H,0,3.6222100157,-0.2461038926,0.8244395101
H,0,3.6965486248,2.0087613308,-0.2068856983
H,0,2.8972942424,1.4043380969,-1.65063241
H,0,0.5815713592,0.5646324979,-1.4603091125
H,0,2.2256410712,-1.0745460612,-1.7577479837
H,0,-1.105187122,1.8211269529,0.2865104499
H,0,-1.4691599903,-2.1373525,1.0015772199
H,0,-2.1955134569,-2.0742055425,-0.5782109608
H,0,0.2537183504,-2.878220566,-0.4889898984
H,0,-0.1079021998,-1.6344428476,-1.6804285147
H,0,-3.1469640296,1.2321612639,1.0148946786
H,0,-4.7349780693,-0.3460975454,2.0271072405
H,0,-3.1103973566,-0.712200679,2.6270738595
H,0,-3.8489196375,-1.7330649843,1.3872503961
H,0,0.9002975862,1.7768579331,1.8466761539
H,0,0.2568096165,3.3534476491,-0.0446018439
H,0,1.9548571531,3.7241902066,-0.3576531948
H,0,0.9758024665,2.9329097715,-1.6074029904
H,0,3.6688582594,-2.6232210691,-0.7938220864
H,0,-4.1051498023,-0.8645676365,-0.9774060556
H,0,-5.0533754708,0.4830286958,-0.3323085879
H,0,0.2305035575,-0.7966161352,2.0260148431
H,0,1.1638067365,-2.259135864,1.6910311543
H,0,1.984462117,-0.7167447735,1.9638357751
H,0,-2.62471603,0.9530223495,-1.6516036698
Recover connectivity data from disk.
ITRead= 0 0 0 0 0 0 0 0 0 0 0 0 0 0 0 0 0 0 0 0
ITRead= 0 0 0 0 0 0 0 0 0 0 0 0 0 0 0 0 0 0 0 0
ITRead= 0 0 0 0
MicOpt= -1 -1 -1 -1 -1 -1 -1 -1 -1 -1 -1 -1 -1 -1 -1 -1 -1 -1 -1 -1
MicOpt= -1 -1 -1 -1 -1 -1 -1 -1 -1 -1 -1 -1 -1 -1 -1 -1 -1 -1 -1 -1
MicOpt= -1 -1 -1 -1
----------------------------
! Current Parameters !
! (Angstroms and Degrees) !
-------------------------- --------------------------
! Name Definition Value !
--------------------------------------------------------------------------------
! R1 R(1,2) 1.5227 !
! R2 R(1,6) 1.5232 !
! R3 R(1,19) 1.0961 !
! R4 R(1,20) 1.0938 !
! R5 R(2,3) 1.5274 !
! R6 R(2,21) 1.0948 !
! R7 R(2,22) 1.0956 !
! R8 R(3,4) 1.5428 !
! R9 R(3,13) 1.4356 !
! R10 R(3,14) 1.5294 !
! R11 R(4,5) 1.5479 !
! R12 R(4,7) 1.505 !
! R13 R(4,23) 1.1012 !
! R14 R(5,6) 1.5329 !
! R15 R(5,10) 1.5356 !
! R16 R(5,17) 1.534 !
! R17 R(6,15) 1.4306 !
! R18 R(6,24) 1.1018 !
! R19 R(7,8) 1.3367 !
! R20 R(7,25) 1.0878 !
! R21 R(8,9) 1.5032 !
! R22 R(8,11) 1.5081 !
! R23 R(9,10) 1.5275 !
! R24 R(9,26) 1.0976 !
! R25 R(9,27) 1.0961 !
! R26 R(10,28) 1.0935 !
! R27 R(10,29) 1.0968 !
! R28 R(11,12) 1.5268 !
! R29 R(11,16) 1.5324 !
! R30 R(11,30) 1.0969 !
! R31 R(12,31) 1.0934 !
! R32 R(12,32) 1.093 !
! R33 R(12,33) 1.0934 !
! R34 R(13,34) 0.9641 !
! R35 R(14,35) 1.0922 !
! R36 R(14,36) 1.0932 !
! R37 R(14,37) 1.093 !
! R38 R(15,38) 0.9631 !
! R39 R(16,18) 1.422 !
! R40 R(16,39) 1.0984 !
! R41 R(16,40) 1.0929 !
! R42 R(17,41) 1.0915 !
! R43 R(17,42) 1.0928 !
! R44 R(17,43) 1.0881 !
! R45 R(18,44) 0.968 !
! A1 A(2,1,6) 111.2717 !
! A2 A(2,1,19) 109.6361 !
! A3 A(2,1,20) 110.5859 !
! A4 A(6,1,19) 109.0898 !
! A5 A(6,1,20) 109.3949 !
! A6 A(19,1,20) 106.7459 !
! A7 A(1,2,3) 113.837 !
! A8 A(1,2,21) 110.5424 !
! A9 A(1,2,22) 109.4367 !
! A10 A(3,2,21) 108.5738 !
! A11 A(3,2,22) 107.4608 !
! A12 A(21,2,22) 106.7041 !
! A13 A(2,3,4) 108.7655 !
! A14 A(2,3,13) 106.6535 !
! A15 A(2,3,14) 108.6864 !
! A16 A(4,3,13) 112.0962 !
! A17 A(4,3,14) 111.1744 !
! A18 A(13,3,14) 109.3077 !
! A19 A(3,4,5) 115.2671 !
! A20 A(3,4,7) 114.2014 !
! A21 A(3,4,23) 103.2419 !
! A22 A(5,4,7) 110.654 !
! A23 A(5,4,23) 105.5867 !
! A24 A(7,4,23) 106.862 !
! A25 A(4,5,6) 107.2463 !
! A26 A(4,5,10) 105.619 !
! A27 A(4,5,17) 114.1151 !
! A28 A(6,5,10) 110.1997 !
! A29 A(6,5,17) 110.6905 !
! A30 A(10,5,17) 108.831 !
! A31 A(1,6,5) 111.819 !
! A32 A(1,6,15) 111.4656 !
! A33 A(1,6,24) 108.4047 !
! A34 A(5,6,15) 109.1311 !
! A35 A(5,6,24) 107.2427 !
! A36 A(15,6,24) 108.6364 !
! A37 A(4,7,8) 124.0347 !
! A38 A(4,7,25) 117.7839 !
! A39 A(8,7,25) 118.1719 !
! A40 A(7,8,9) 121.3435 !
! A41 A(7,8,11) 120.4848 !
! A42 A(9,8,11) 118.1321 !
! A43 A(8,9,10) 113.2972 !
! A44 A(8,9,26) 108.2736 !
! A45 A(8,9,27) 109.7879 !
! A46 A(10,9,26) 110.1792 !
! A47 A(10,9,27) 109.9984 !
! A48 A(26,9,27) 104.959 !
! A49 A(5,10,9) 111.9434 !
! A50 A(5,10,28) 109.8347 !
! A51 A(5,10,29) 108.593 !
! A52 A(9,10,28) 109.778 !
! A53 A(9,10,29) 109.6275 !
! A54 A(28,10,29) 106.9282 !
! A55 A(8,11,12) 113.7294 !
! A56 A(8,11,16) 109.4499 !
! A57 A(8,11,30) 107.8367 !
! A58 A(12,11,16) 109.7841 !
! A59 A(12,11,30) 108.8573 !
! A60 A(16,11,30) 106.9437 !
! A61 A(11,12,31) 110.4244 !
! A62 A(11,12,32) 111.0523 !
! A63 A(11,12,33) 111.4953 !
! A64 A(31,12,32) 108.1178 !
! A65 A(31,12,33) 107.7088 !
! A66 A(32,12,33) 107.9023 !
! A67 A(3,13,34) 107.8113 !
! A68 A(3,14,35) 111.683 !
! A69 A(3,14,36) 109.4426 !
! A70 A(3,14,37) 111.0464 !
! A71 A(35,14,36) 107.8225 !
! A72 A(35,14,37) 108.2739 !
! A73 A(36,14,37) 108.4636 !
! A74 A(6,15,38) 107.5244 !
! A75 A(11,16,18) 112.6098 !
! A76 A(11,16,39) 109.7947 !
! A77 A(11,16,40) 109.7044 !
! A78 A(18,16,39) 110.2725 !
! A79 A(18,16,40) 106.5876 !
! A80 A(39,16,40) 107.7104 !
! A81 A(5,17,41) 110.9137 !
! A82 A(5,17,42) 109.7038 !
! A83 A(5,17,43) 112.3275 !
! A84 A(41,17,42) 107.9846 !
! A85 A(41,17,43) 107.4242 !
! A86 A(42,17,43) 108.3452 !
! A87 A(16,18,44) 106.7413 !
! D1 D(6,1,2,3) 54.5258 !
! D2 D(6,1,2,21) 177.0354 !
! D3 D(6,1,2,22) -65.7239 !
! D4 D(19,1,2,3) 175.292 !
! D5 D(19,1,2,21) -62.1984 !
! D6 D(19,1,2,22) 55.0423 !
! D7 D(20,1,2,3) -67.2696 !
! D8 D(20,1,2,21) 55.24 !
! D9 D(20,1,2,22) 172.4807 !
! D10 D(2,1,6,5) -57.8258 !
! D11 D(2,1,6,15) 179.7109 !
! D12 D(2,1,6,24) 60.1906 !
! D13 D(19,1,6,5) -178.9124 !
! D14 D(19,1,6,15) 58.6243 !
! D15 D(19,1,6,24) -60.896 !
! D16 D(20,1,6,5) 64.6592 !
! D17 D(20,1,6,15) -57.8041 !
! D18 D(20,1,6,24) -177.3244 !
! D19 D(1,2,3,4) -50.6851 !
! D20 D(1,2,3,13) 70.3997 !
! D21 D(1,2,3,14) -171.8583 !
! D22 D(21,2,3,4) -174.2697 !
! D23 D(21,2,3,13) -53.185 !
! D24 D(21,2,3,14) 64.5571 !
! D25 D(22,2,3,4) 70.6703 !
! D26 D(22,2,3,13) -168.2449 !
! D27 D(22,2,3,14) -50.5028 !
! D28 D(2,3,4,5) 53.1688 !
! D29 D(2,3,4,7) -177.0572 !
! D30 D(2,3,4,23) -61.4329 !
! D31 D(13,3,4,5) -64.5155 !
! D32 D(13,3,4,7) 65.2585 !
! D33 D(13,3,4,23) -179.1172 !
! D34 D(14,3,4,5) 172.8044 !
! D35 D(14,3,4,7) -57.4216 !
! D36 D(14,3,4,23) 58.2027 !
! D37 D(2,3,13,34) -168.5664 !
! D38 D(4,3,13,34) -49.6301 !
! D39 D(14,3,13,34) 74.1017 !
! D40 D(2,3,14,35) -172.4206 !
! D41 D(2,3,14,36) -53.1034 !
! D42 D(2,3,14,37) 66.6119 !
! D43 D(4,3,14,35) 67.8967 !
! D44 D(4,3,14,36) -172.786 !
! D45 D(4,3,14,37) -53.0708 !
! D46 D(13,3,14,35) -56.3771 !
! D47 D(13,3,14,36) 62.9401 !
! D48 D(13,3,14,37) -177.3446 !
! D49 D(3,4,5,6) -56.4865 !
! D50 D(3,4,5,10) -174.0155 !
! D51 D(3,4,5,17) 66.4898 !
! D52 D(7,4,5,6) 172.0325 !
! D53 D(7,4,5,10) 54.5035 !
! D54 D(7,4,5,17) -64.9912 !
! D55 D(23,4,5,6) 56.7566 !
! D56 D(23,4,5,10) -60.7725 !
! D57 D(23,4,5,17) 179.7328 !
! D58 D(3,4,7,8) -157.7307 !
! D59 D(3,4,7,25) 23.4152 !
! D60 D(5,4,7,8) -25.6998 !
! D61 D(5,4,7,25) 155.4461 !
! D62 D(23,4,7,8) 88.7758 !
! D63 D(23,4,7,25) -90.0783 !
! D64 D(4,5,6,1) 57.1479 !
! D65 D(4,5,6,15) -179.0653 !
! D66 D(4,5,6,24) -61.5605 !
! D67 D(10,5,6,1) 171.6425 !
! D68 D(10,5,6,15) -64.5707 !
! D69 D(10,5,6,24) 52.9341 !
! D70 D(17,5,6,1) -67.9199 !
! D71 D(17,5,6,15) 55.8669 !
! D72 D(17,5,6,24) 173.3717 !
! D73 D(4,5,10,9) -64.3788 !
! D74 D(4,5,10,28) 173.4037 !
! D75 D(4,5,10,29) 56.7932 !
! D76 D(6,5,10,9) -179.9023 !
! D77 D(6,5,10,28) 57.8803 !
! D78 D(6,5,10,29) -58.7302 !
! D79 D(17,5,10,9) 58.548 !
! D80 D(17,5,10,28) -63.6694 !
! D81 D(17,5,10,29) 179.72 !
! D82 D(4,5,17,41) 46.1726 !
! D83 D(4,5,17,42) 165.3784 !
! D84 D(4,5,17,43) -74.0582 !
! D85 D(6,5,17,41) 167.2562 !
! D86 D(6,5,17,42) -73.538 !
! D87 D(6,5,17,43) 47.0254 !
! D88 D(10,5,17,41) -71.4938 !
! D89 D(10,5,17,42) 47.712 !
! D90 D(10,5,17,43) 168.2754 !
! D91 D(1,6,15,38) -54.6632 !
! D92 D(5,6,15,38) -178.6587 !
! D93 D(24,6,15,38) 64.7197 !
! D94 D(4,7,8,9) 1.4261 !
! D95 D(4,7,8,11) -176.2409 !
! D96 D(25,7,8,9) -179.7239 !
! D97 D(25,7,8,11) 2.6091 !
! D98 D(7,8,9,10) -9.0411 !
! D99 D(7,8,9,26) 113.4873 !
! D100 D(7,8,9,27) -132.4525 !
! D101 D(11,8,9,10) 168.6791 !
! D102 D(11,8,9,26) -68.7925 !
! D103 D(11,8,9,27) 45.2678 !
! D104 D(7,8,11,12) -136.6375 !
! D105 D(7,8,11,16) 100.1776 !
! D106 D(7,8,11,30) -15.8181 !
! D107 D(9,8,11,12) 45.6219 !
! D108 D(9,8,11,16) -77.563 !
! D109 D(9,8,11,30) 166.4413 !
! D110 D(8,9,10,5) 41.7573 !
! D111 D(8,9,10,28) 164.0071 !
! D112 D(8,9,10,29) -78.8152 !
! D113 D(26,9,10,5) -79.7073 !
! D114 D(26,9,10,28) 42.5425 !
! D115 D(26,9,10,29) 159.7202 !
! D116 D(27,9,10,5) 165.0529 !
! D117 D(27,9,10,28) -72.6973 !
! D118 D(27,9,10,29) 44.4804 !
! D119 D(8,11,12,31) 175.5546 !
! D120 D(8,11,12,32) 55.6273 !
! D121 D(8,11,12,33) -64.7429 !
! D122 D(16,11,12,31) -61.4433 !
! D123 D(16,11,12,32) 178.6294 !
! D124 D(16,11,12,33) 58.2593 !
! D125 D(30,11,12,31) 55.3091 !
! D126 D(30,11,12,32) -64.6182 !
! D127 D(30,11,12,33) 175.0116 !
! D128 D(8,11,16,18) -58.0212 !
! D129 D(8,11,16,39) 65.2631 !
! D130 D(8,11,16,40) -176.552 !
! D131 D(12,11,16,18) 176.4884 !
! D132 D(12,11,16,39) -60.2274 !
! D133 D(12,11,16,40) 57.9575 !
! D134 D(30,11,16,18) 58.541 !
! D135 D(30,11,16,39) -178.1748 !
! D136 D(30,11,16,40) -59.9898 !
! D137 D(11,16,18,44) 42.1619 !
! D138 D(39,16,18,44) -80.8555 !
! D139 D(40,16,18,44) 162.5033 !
--------------------------------------------------------------------------------
NAtoms= 44 NQM= 44 NQMF= 0 NMMI= 0 NMMIF= 0
NMic= 0 NMicF= 0.
Isotopes and Nuclear Properties:
(Nuclear quadrupole moments (NQMom) in fm**2, nuclear magnetic moments (NMagM)
in nuclear magnetons)
Atom 1 2 3 4 5 6 7 8 9 10
IAtWgt= 12 12 12 12 12 12 12 12 12 12
AtmWgt= 12.0000000 12.0000000 12.0000000 12.0000000 12.0000000 12.0000000 12.0000000 12.0000000 12.0000000 12.0000000
NucSpn= 0 0 0 0 0 0 0 0 0 0
AtZEff= 3.6000000 3.6000000 3.6000000 3.6000000 3.6000000 3.6000000 3.6000000 3.6000000 3.6000000 3.6000000
NQMom= 0.0000000 0.0000000 0.0000000 0.0000000 0.0000000 0.0000000 0.0000000 0.0000000 0.0000000 0.0000000
NMagM= 0.0000000 0.0000000 0.0000000 0.0000000 0.0000000 0.0000000 0.0000000 0.0000000 0.0000000 0.0000000
AtZNuc= 6.0000000 6.0000000 6.0000000 6.0000000 6.0000000 6.0000000 6.0000000 6.0000000 6.0000000 6.0000000
Atom 11 12 13 14 15 16 17 18 19 20
IAtWgt= 12 12 16 12 16 12 12 16 1 1
AtmWgt= 12.0000000 12.0000000 15.9949146 12.0000000 15.9949146 12.0000000 12.0000000 15.9949146 1.0078250 1.0078250
NucSpn= 0 0 0 0 0 0 0 0 1 1
AtZEff= 3.6000000 3.6000000 5.6000000 3.6000000 5.6000000 3.6000000 3.6000000 5.6000000 1.0000000 1.0000000
NQMom= 0.0000000 0.0000000 0.0000000 0.0000000 0.0000000 0.0000000 0.0000000 0.0000000 0.0000000 0.0000000
NMagM= 0.0000000 0.0000000 0.0000000 0.0000000 0.0000000 0.0000000 0.0000000 0.0000000 2.7928460 2.7928460
AtZNuc= 6.0000000 6.0000000 8.0000000 6.0000000 8.0000000 6.0000000 6.0000000 8.0000000 1.0000000 1.0000000
Atom 21 22 23 24 25 26 27 28 29 30
IAtWgt= 1 1 1 1 1 1 1 1 1 1
AtmWgt= 1.0078250 1.0078250 1.0078250 1.0078250 1.0078250 1.0078250 1.0078250 1.0078250 1.0078250 1.0078250
NucSpn= 1 1 1 1 1 1 1 1 1 1
AtZEff= 1.0000000 1.0000000 1.0000000 1.0000000 1.0000000 1.0000000 1.0000000 1.0000000 1.0000000 1.0000000
NQMom= 0.0000000 0.0000000 0.0000000 0.0000000 0.0000000 0.0000000 0.0000000 0.0000000 0.0000000 0.0000000
NMagM= 2.7928460 2.7928460 2.7928460 2.7928460 2.7928460 2.7928460 2.7928460 2.7928460 2.7928460 2.7928460
AtZNuc= 1.0000000 1.0000000 1.0000000 1.0000000 1.0000000 1.0000000 1.0000000 1.0000000 1.0000000 1.0000000
Atom 31 32 33 34 35 36 37 38 39 40
IAtWgt= 1 1 1 1 1 1 1 1 1 1
AtmWgt= 1.0078250 1.0078250 1.0078250 1.0078250 1.0078250 1.0078250 1.0078250 1.0078250 1.0078250 1.0078250
NucSpn= 1 1 1 1 1 1 1 1 1 1
AtZEff= 1.0000000 1.0000000 1.0000000 1.0000000 1.0000000 1.0000000 1.0000000 1.0000000 1.0000000 1.0000000
NQMom= 0.0000000 0.0000000 0.0000000 0.0000000 0.0000000 0.0000000 0.0000000 0.0000000 0.0000000 0.0000000
NMagM= 2.7928460 2.7928460 2.7928460 2.7928460 2.7928460 2.7928460 2.7928460 2.7928460 2.7928460 2.7928460
AtZNuc= 1.0000000 1.0000000 1.0000000 1.0000000 1.0000000 1.0000000 1.0000000 1.0000000 1.0000000 1.0000000
Atom 41 42 43 44
IAtWgt= 1 1 1 1
AtmWgt= 1.0078250 1.0078250 1.0078250 1.0078250
NucSpn= 1 1 1 1
AtZEff= 1.0000000 1.0000000 1.0000000 1.0000000
NQMom= 0.0000000 0.0000000 0.0000000 0.0000000
NMagM= 2.7928460 2.7928460 2.7928460 2.7928460
AtZNuc= 1.0000000 1.0000000 1.0000000 1.0000000
Leave Link 101 at Wed May 20 07:56:04 2020, MaxMem= 3221225472 cpu: 4.6 elap: 0.4
(Enter /public/apps/g16/l202.exe)
Input orientation:
---------------------------------------------------------------------
Center Atomic Atomic Coordinates (Angstroms)
Number Number Type X Y Z
---------------------------------------------------------------------
1 6 0 3.421586 -0.138386 -0.245435
2 6 0 2.963470 1.278371 -0.564291
3 6 0 1.598301 1.632360 0.022126
4 6 0 0.592262 0.526748 -0.359795
5 6 0 1.025345 -0.914515 0.002573
6 6 0 2.379636 -1.164935 -0.670560
7 6 0 -0.816615 0.789063 0.099742
8 6 0 -1.737684 -0.164517 0.270352
9 6 0 -1.414657 -1.614103 0.038272
10 6 0 -0.045836 -1.832795 -0.603457
11 6 0 -3.151021 0.196631 0.653036
12 6 0 -3.743085 -0.702184 1.735905
13 8 0 1.774866 1.734384 1.443129
14 6 0 1.163979 2.989954 -0.532236
15 8 0 2.808787 -2.498119 -0.378900
16 6 0 -4.041693 0.162629 -0.593464
17 6 0 1.111791 -1.182554 1.510541
18 8 0 -3.587790 1.042891 -1.613902
19 1 0 4.363439 -0.346879 -0.765942
20 1 0 3.622210 -0.246104 0.824440
21 1 0 3.696549 2.008761 -0.206886
22 1 0 2.897294 1.404338 -1.650632
23 1 0 0.581571 0.564632 -1.460309
24 1 0 2.225641 -1.074546 -1.757748
25 1 0 -1.105187 1.821127 0.286510
26 1 0 -1.469160 -2.137353 1.001577
27 1 0 -2.195513 -2.074206 -0.578211
28 1 0 0.253718 -2.878221 -0.488990
29 1 0 -0.107902 -1.634443 -1.680429
30 1 0 -3.146964 1.232161 1.014895
31 1 0 -4.734978 -0.346098 2.027107
32 1 0 -3.110397 -0.712201 2.627074
33 1 0 -3.848920 -1.733065 1.387250
34 1 0 0.900298 1.776858 1.846676
35 1 0 0.256810 3.353448 -0.044602
36 1 0 1.954857 3.724190 -0.357653
37 1 0 0.975802 2.932910 -1.607403
38 1 0 3.668858 -2.623221 -0.793822
39 1 0 -4.105150 -0.864568 -0.977406
40 1 0 -5.053375 0.483029 -0.332309
41 1 0 0.230504 -0.796616 2.026015
42 1 0 1.163807 -2.259136 1.691031
43 1 0 1.984462 -0.716745 1.963836
44 1 0 -2.624716 0.953022 -1.651604
---------------------------------------------------------------------
Distance matrix (angstroms):
1 2 3 4 5
1 C 0.000000
2 C 1.522740 0.000000
3 C 2.555679 1.527377 0.000000
4 C 2.908703 2.495873 1.542840 0.000000
5 C 2.530979 2.981009 2.610600 1.547938 0.000000
6 C 1.523219 2.514339 2.985826 2.480539 1.532946
7 C 4.352202 3.869032 2.559101 1.504965 2.510864
8 C 5.185054 4.987926 3.797260 2.510694 2.875506
9 C 5.064334 5.281806 4.429187 2.961321 2.538564
10 C 3.875851 4.328604 3.886109 2.456417 1.535559
11 C 6.642187 6.327641 5.001542 3.891911 4.370329
12 C 7.454937 7.361479 6.075980 4.969655 5.078134
13 O 3.011677 2.377070 1.435560 2.471330 3.107032
14 C 3.868534 2.483690 1.529385 2.534557 3.943364
15 O 2.441654 3.784200 4.322840 3.750089 2.415365
16 C 7.477451 7.093522 5.860768 4.654109 5.214440
17 C 3.083649 3.713461 3.221151 2.586461 1.534042
18 O 7.238748 6.638987 5.469882 4.394545 5.265496
19 H 1.096122 2.154533 3.490619 3.892294 3.472132
20 H 1.093840 2.164840 2.875507 3.343695 2.804629
21 H 2.165024 1.094812 2.144007 3.443303 3.965444
22 H 2.151618 1.095620 2.130140 2.783810 3.407985
23 H 3.167939 2.643050 2.090788 1.101218 2.127167
24 H 2.143308 2.739516 3.299825 2.680735 2.136598
25 H 4.961283 4.191947 2.722936 2.230350 3.479012
26 H 5.428656 5.810965 4.957759 3.633212 2.952269
27 H 5.950626 6.152648 5.337795 3.818947 3.472193
28 H 4.195402 4.962426 4.734393 3.424195 2.166375
29 H 4.093248 4.377622 4.059781 2.627746 2.152914
30 H 6.827348 6.311368 4.864493 4.045886 4.800123
31 H 8.469778 8.283740 6.931426 5.902428 6.132141
32 H 7.158728 7.144162 5.869801 4.915900 4.902377
33 H 7.620296 7.699735 6.546897 5.280437 5.132817
34 H 3.794995 3.212154 1.958845 2.554638 3.264941
35 H 4.716889 3.449932 2.183162 2.863932 4.336863
36 H 4.133204 2.653683 2.155718 3.475673 4.744612
37 H 4.155679 2.788621 2.175845 2.737379 4.170990
38 H 2.556615 3.971483 4.802389 4.424492 3.246857
39 H 7.597031 7.397854 6.305796 4.937903 5.223488
40 H 8.498157 8.059541 6.759541 5.645874 6.246288
41 H 3.971871 4.299345 3.433128 2.752136 2.177152
42 H 3.653088 4.565000 4.256497 3.506237 2.162884
43 H 2.698278 3.366061 3.072076 2.980563 2.192161
44 H 6.302876 5.702274 4.593119 3.492768 4.421193
6 7 8 9 10
6 C 0.000000
7 C 3.824591 0.000000
8 C 4.340332 1.336709 0.000000
9 C 3.885981 2.477224 1.503165 0.000000
10 C 2.516636 2.821831 2.531609 1.527518 0.000000
11 C 5.847558 2.471145 1.508110 2.582954 3.916570
12 C 6.594917 3.669478 2.541370 3.022438 4.518910
13 O 3.638610 3.068240 4.161639 4.833119 4.497581
14 C 4.331289 3.027552 4.360560 5.307747 4.972689
15 O 1.430599 4.917133 5.151468 4.335089 2.939720
16 C 6.557579 3.357690 2.482269 3.233758 4.466396
17 C 2.522884 3.097802 3.270165 2.955800 2.496378
18 O 6.432307 3.268091 2.903643 3.809436 4.672902
19 H 2.147973 5.373335 6.191193 5.969841 4.655755
20 H 2.150178 4.615184 5.389076 5.278211 4.243942
21 H 3.467218 4.685118 5.872119 6.269742 5.377757
22 H 2.798156 4.151566 5.256854 5.527776 4.498625
23 H 2.616896 2.106906 2.984257 3.313240 2.622117
24 H 1.101754 4.022267 4.544149 4.094945 2.658372
25 H 4.687915 1.087802 2.084010 3.458062 3.907098
26 H 4.307536 3.130979 2.121055 1.097597 2.166735
27 H 4.665543 3.249506 2.139293 1.096122 2.163337
28 H 2.736392 3.865383 3.450575 2.158582 1.093503
29 H 2.725457 3.089444 2.936395 2.159155 1.096843
30 H 6.255409 2.542512 2.119227 3.472161 4.650808
31 H 7.652819 4.511861 3.478927 4.072817 5.578368
32 H 6.420267 3.728624 2.781805 3.223486 4.591688
33 H 6.584244 4.148937 2.857467 2.785594 4.293752
34 H 4.144764 2.641081 3.634926 4.486419 4.464070
35 H 5.031302 2.783729 4.056264 5.241872 5.225039
36 H 4.917509 4.062664 5.399194 6.325168 5.911284
37 H 4.431789 3.274627 4.525818 5.394243 4.976304
38 H 1.950355 5.706278 6.033937 5.249079 3.802626
39 H 6.498986 3.835258 2.766200 2.971894 4.189908
40 H 7.621014 4.269715 3.431665 4.216108 5.523768
41 H 3.467845 2.705802 2.712133 2.706651 2.839745
42 H 2.872739 3.968096 3.850248 3.129881 2.628627
43 H 2.701311 3.686236 4.126405 4.008373 3.458131
44 H 5.521932 2.522563 2.393665 3.303037 3.938275
11 12 13 14 15
11 C 0.000000
12 C 1.526766 0.000000
13 O 5.220469 6.039070 0.000000
14 C 5.275106 6.546421 2.419031 0.000000
15 O 6.621622 7.115111 4.722590 5.731304 0.000000
16 C 1.532389 2.502605 6.360070 5.924233 7.352190
17 C 4.561692 4.883786 2.992113 4.646019 2.860156
18 O 2.458848 3.780293 6.211416 5.247892 7.414862
19 H 7.666551 8.491243 3.989029 4.628782 2.682271
20 H 6.789849 7.435479 2.778090 4.284337 2.679786
21 H 7.135299 8.153024 2.547684 2.735416 4.596703
22 H 6.583886 7.746012 3.307587 2.601801 4.105400
23 H 4.305101 5.524786 3.349959 2.661335 3.938322
24 H 6.027957 6.926035 4.282394 4.375976 2.065875
25 H 2.637947 3.927639 3.104835 2.680600 5.866673
26 H 2.897864 2.787415 5.070406 5.964502 4.509623
27 H 2.754208 3.103636 5.861321 6.077336 5.026177
28 H 4.727704 5.065543 5.227149 5.938512 2.585532
29 H 4.249525 5.074938 4.964919 4.931640 3.308624
30 H 1.096941 2.148699 4.965886 4.905882 7.164400
31 H 2.165998 1.093366 6.859119 7.244113 8.205392
32 H 2.173580 1.092966 5.590465 6.477460 6.874745
33 H 2.179418 1.093379 6.607064 7.149860 6.930343
34 H 4.509443 5.264876 0.964119 2.683348 5.183719
35 H 4.697392 5.968040 2.671930 1.092186 6.392587
36 H 6.287699 7.512810 2.689711 1.093193 6.280667
37 H 5.443112 6.830777 3.373531 1.092999 5.862177
38 H 7.520353 8.063920 5.251654 6.152283 0.963086
39 H 2.166759 2.742174 6.869362 6.543641 7.129462
40 H 2.161453 2.720128 7.165400 6.706724 8.408508
41 H 3.782369 3.985284 3.021717 4.664133 3.914878
42 H 5.072077 5.148174 4.047598 5.700515 2.654748
43 H 5.378256 5.732099 2.514577 4.543477 3.056340
44 H 2.482033 3.932642 5.435460 4.444804 6.561487
16 17 18 19 20
16 C 0.000000
17 C 5.726671 0.000000
18 O 1.422035 6.066368 0.000000
19 H 8.422327 4.056346 8.116190 0.000000
20 H 7.804674 2.765841 7.719529 1.757523 0.000000
21 H 7.964800 4.451406 7.481591 2.511240 2.480640
22 H 7.128043 4.457920 6.495253 2.449290 3.061934
23 H 4.720975 3.487083 4.199512 3.951648 3.888811
24 H 6.493508 3.454568 6.188717 2.466447 3.050314
25 H 3.485404 3.928784 3.221885 5.976101 5.187590
26 H 3.801579 2.798570 4.630688 6.352097 5.434174
27 H 2.900352 4.012006 3.567546 6.785187 6.257419
28 H 5.263862 2.758568 5.603368 4.834687 4.472122
29 H 4.459335 3.445888 4.391146 4.742046 4.702721
30 H 2.128675 4.920723 2.672214 7.878509 6.931324
31 H 2.758050 5.928846 4.062300 9.517474 8.443874
32 H 3.464752 4.392580 4.614556 8.216097 6.985323
33 H 2.748463 4.992686 4.096466 8.602359 7.638428
34 H 5.743109 2.985940 5.714652 4.830050 3.542054
35 H 5.381422 4.870808 4.752087 5.574689 5.003791
36 H 6.978463 5.317617 6.283985 4.747796 4.465495
37 H 5.820463 5.164989 4.939493 4.789692 4.798277
38 H 8.200836 3.731515 8.171405 2.380116 2.876045
39 H 1.098440 5.788564 2.076340 8.487032 7.958721
40 H 1.092867 6.646769 2.025801 9.463254 8.782681
41 H 5.102302 1.091480 5.586784 5.007838 3.640126
42 H 6.179086 1.092845 6.663606 4.464425 3.293482
43 H 6.605122 1.088122 6.851754 3.639783 2.049865
44 H 1.937061 5.340537 0.967993 7.162992 6.825890
21 22 23 24 25
21 H 0.000000
22 H 1.757424 0.000000
23 H 3.655087 2.470607 0.000000
24 H 3.751737 2.570498 2.340586 0.000000
25 H 4.830664 4.466105 2.734102 4.863983 0.000000
26 H 6.733141 6.216407 4.191313 4.732334 4.038980
27 H 7.178084 6.259956 3.931128 4.683720 4.136444
28 H 5.984585 5.165096 3.592240 2.958288 4.952968
29 H 5.469745 4.273907 2.315115 2.401018 4.099316
30 H 6.994964 6.608157 4.524843 6.470961 2.246392
31 H 9.034751 8.651091 6.423177 7.956506 4.571862
32 H 7.859356 7.672735 5.653993 6.916015 3.989593
33 H 8.571851 8.036382 5.746065 6.872041 4.622984
34 H 3.477056 4.044494 3.536556 4.783191 2.541269
35 H 3.696799 3.653837 3.144390 5.139873 2.076699
36 H 2.449269 2.818102 3.617260 5.006142 3.660665
37 H 3.196554 2.455714 2.405367 4.200524 3.025473
38 H 4.669103 4.189352 4.487533 2.326032 6.611419
39 H 8.349624 7.391576 4.923532 6.382158 4.220215
40 H 8.882835 8.111716 5.747319 7.579050 4.214456
41 H 4.986929 5.047148 3.759082 4.286570 3.415044
42 H 5.313362 5.252879 4.271254 3.798002 4.875403
43 H 3.882223 4.289130 3.915967 3.746515 4.335913
44 H 6.569641 5.540423 3.235385 5.258162 2.611295
26 27 28 29 30
26 H 0.000000
27 H 1.739916 0.000000
28 H 2.395618 2.579368 0.000000
29 H 3.049442 2.401332 1.759909 0.000000
30 H 3.764150 3.791478 5.542702 4.971728 0.000000
31 H 3.863402 4.027769 6.134288 6.067577 2.457084
32 H 2.714214 3.600822 5.071368 5.331049 2.526065
33 H 2.444473 2.590978 4.654385 4.838966 3.069846
34 H 4.652909 5.504072 5.248157 5.009382 4.167599
35 H 5.849987 5.979803 6.247494 5.261938 4.148260
36 H 6.923083 7.134116 6.819307 5.892339 5.841462
37 H 6.204207 6.015620 5.961668 4.694727 5.173606
38 H 5.464317 5.893960 3.438187 4.003458 8.036844
39 H 3.533383 2.295494 4.826291 4.130973 3.046909
40 H 4.635973 3.842823 6.283931 5.546063 2.451645
41 H 2.394974 3.781506 3.264792 3.814996 4.067627
42 H 2.724462 4.058164 2.442134 3.657079 5.588297
43 H 3.856368 5.077095 3.699163 4.301258 5.570481
44 H 4.233804 3.240447 4.931073 3.609731 2.731460
31 32 33 34 35
31 H 0.000000
32 H 1.770100 0.000000
33 H 1.765841 1.767694 0.000000
34 H 6.024602 4.784361 5.923318 0.000000
35 H 6.549546 5.916539 6.691773 2.544925 0.000000
36 H 8.185855 7.365254 8.155375 3.124623 1.766017
37 H 7.521607 6.922041 7.349640 3.643188 1.770918
38 H 9.152453 7.830251 7.878226 5.830768 6.922714
39 H 3.113293 3.742329 2.532102 6.325114 6.139093
40 H 2.521045 3.736533 3.052649 6.470563 6.043190
41 H 4.985878 3.395588 4.233987 2.665250 4.638014
42 H 6.210340 4.640906 5.049402 4.047581 5.944423
43 H 6.729952 5.137850 5.949260 2.721616 4.856446
44 H 4.435519 4.616918 4.236552 5.034122 4.080158
36 37 38 39 40
36 H 0.000000
37 H 1.773851 0.000000
38 H 6.589209 6.227765 0.000000
39 H 7.626564 6.374465 7.972563 0.000000
40 H 7.721470 6.631649 9.270337 1.769548 0.000000
41 H 5.393789 5.259901 4.807312 5.274755 5.926091
42 H 6.373622 6.154052 3.547159 6.068548 7.089903
43 H 5.011197 5.204913 3.751869 6.764328 7.499526
44 H 5.506920 4.109214 7.289334 2.439233 2.803537
41 42 43 44
41 H 0.000000
42 H 1.766984 0.000000
43 H 1.756877 1.768295 0.000000
44 H 4.973770 5.986992 6.091309 0.000000
Stoichiometry C15H26O3
Framework group C1[X(C15H26O3)]
Deg. of freedom 126
Full point group C1 NOp 1
RotChk: IX=0 Diff= 3.85D-16
Largest Abelian subgroup C1 NOp 1
Largest concise Abelian subgroup C1 NOp 1
Standard orientation:
---------------------------------------------------------------------
Center Atomic Atomic Coordinates (Angstroms)
Number Number Type X Y Z
---------------------------------------------------------------------
1 6 0 3.420113 -0.156016 -0.155838
2 6 0 2.983181 1.288672 -0.357597
3 6 0 1.600214 1.600407 0.210824
4 6 0 0.601211 0.544988 -0.307284
5 6 0 1.011400 -0.927881 -0.065385
6 6 0 2.387301 -1.128358 -0.710854
7 6 0 -0.821488 0.777633 0.124831
8 6 0 -1.754414 -0.178431 0.173632
9 6 0 -1.432909 -1.603439 -0.180619
10 6 0 -0.043406 -1.775380 -0.791380
11 6 0 -3.178151 0.159780 0.538300
12 6 0 -3.814696 -0.829516 1.511500
13 8 0 1.726297 1.568633 1.640484
14 6 0 1.195126 3.007763 -0.229936
15 8 0 2.796820 -2.487029 -0.529409
16 6 0 -4.023681 0.250229 -0.736500
17 6 0 1.041839 -1.335265 1.413262
18 8 0 -3.527571 1.216646 -1.654158
19 1 0 4.378647 -0.324777 -0.660036
20 1 0 3.581457 -0.364342 0.905790
21 1 0 3.707791 1.975490 0.091664
22 1 0 2.956909 1.515355 -1.429189
23 1 0 0.630310 0.684730 -1.399212
24 1 0 2.273062 -0.936146 -1.789680
25 1 0 -1.109711 1.790787 0.396416
26 1 0 -1.525459 -2.213081 0.727395
27 1 0 -2.194161 -1.996676 -0.864243
28 1 0 0.244883 -2.829844 -0.764074
29 1 0 -0.065426 -1.477536 -1.846779
30 1 0 -3.180206 1.157257 0.994716
31 1 0 -4.814018 -0.492069 1.799481
32 1 0 -3.214509 -0.928318 2.419569
33 1 0 -3.914794 -1.822573 1.065077
34 1 0 0.838099 1.582259 2.015242
35 1 0 0.273464 3.333550 0.257171
36 1 0 1.984089 3.714765 0.039795
37 1 0 1.045316 3.052409 -1.311699
38 1 0 3.670389 -2.581726 -0.923673
39 1 0 -4.080137 -0.736314 -1.216204
40 1 0 -5.041937 0.555124 -0.482428
41 1 0 0.145191 -0.989967 1.931066
42 1 0 1.080175 -2.424399 1.494669
43 1 0 1.900744 -0.922148 1.938263
44 1 0 -2.564383 1.121071 -1.666172
---------------------------------------------------------------------
Rotational constants (GHZ): 0.6609595 0.2897302 0.2436586
Leave Link 202 at Wed May 20 07:56:04 2020, MaxMem= 3221225472 cpu: 0.1 elap: 0.0
(Enter /public/apps/g16/l301.exe)
Standard basis: 6-311+G(2d,p) (5D, 7F)
Ernie: Thresh= 0.10000D-02 Tol= 0.10000D-05 Strict=F.
There are 678 symmetry adapted cartesian basis functions of A symmetry.
There are 642 symmetry adapted basis functions of A symmetry.
642 basis functions, 964 primitive gaussians, 678 cartesian basis functions
70 alpha electrons 70 beta electrons
nuclear repulsion energy 1522.7870039681 Hartrees.
IExCor= 3731 DFT=T Ex+Corr=APFD ExCW=0 ScaHFX= 0.229450
ScaDFX= 1.000000 1.000000 1.000000 1.000000 ScalE2= 1.000000 1.000000
IRadAn= 5 IRanWt= -1 IRanGd= 0 ICorTp=0 IEmpDi=211
NAtoms= 44 NActive= 44 NUniq= 44 SFac= 1.00D+00 NAtFMM= 60 NAOKFM=F Big=F
Integral buffers will be 131072 words long.
Regular integral format.
Two-electron integral symmetry is turned on.
R6APFD: NTU= -4 IXU= 1 FactS= 1.050
R6Disp: Petersson-Frisch Dispersion energy= -0.0521608816 Hartrees.
Nuclear repulsion after empirical dispersion term = 1522.7348430865 Hartrees.
------------------------------------------------------------------------------
Polarizable Continuum Model (PCM)
=================================
Model : PCM.
Atomic radii : Bondi.
Polarization charges : Total charges.
Charge compensation : None.
Solution method : Matrix inversion.
Cavity type : Scaled VdW (van der Waals Surface) (Alpha=1.100).
Cavity algorithm : GePol (No added spheres)
Default sphere list used, NSphG= 44.
Lebedev-Laikov grids with approx. 5.0 points / Ang**2.
Smoothing algorithm: York/Karplus (Gamma=1.0000).
Polarization charges: spherical gaussians, with
point-specific exponents (IZeta= 3).
Self-potential: point-specific (ISelfS= 7).
Self-field : sphere-specific E.n sum rule (ISelfD= 2).
Solvent : Methanol, Eps= 32.613000 Eps(inf)= 1.765709
------------------------------------------------------------------------------
GePol: Number of generator spheres = 44
GePol: Total number of spheres = 44
GePol: Number of exposed spheres = 44 (100.00%)
GePol: Number of points = 2446
GePol: Average weight of points = 0.13
GePol: Minimum weight of points = 0.48D-09
GePol: Maximum weight of points = 0.21770
GePol: Number of points with low weight = 212
GePol: Fraction of low-weight points (<1% of avg) = 8.67%
GePol: Cavity surface area = 307.825 Ang**2
GePol: Cavity volume = 298.572 Ang**3
Leave Link 301 at Wed May 20 07:56:04 2020, MaxMem= 3221225472 cpu: 1.0 elap: 0.1
(Enter /public/apps/g16/l302.exe)
NPDir=0 NMtPBC= 1 NCelOv= 1 NCel= 1 NClECP= 1 NCelD= 1
NCelK= 1 NCelE2= 1 NClLst= 1 CellRange= 0.0.
One-electron integrals computed using PRISM.
One-electron integral symmetry used in STVInt
NBasis= 642 RedAO= T EigKep= 1.62D-06 NBF= 642
NBsUse= 640 1.00D-06 EigRej= 8.22D-07 NBFU= 640
Precomputing XC quadrature grid using
IXCGrd= 4 IRadAn= 5 IRanWt= -1 IRanGd= 0 AccXCQ= 0.00D+00.
Generated NRdTot= 0 NPtTot= 0 NUsed= 0 NTot= 32
NSgBfM= 677 677 677 677 677 MxSgAt= 44 MxSgA2= 44.
Leave Link 302 at Wed May 20 07:56:05 2020, MaxMem= 3221225472 cpu: 10.0 elap: 0.9
(Enter /public/apps/g16/l303.exe)
DipDrv: MaxL=1.
Leave Link 303 at Wed May 20 07:56:05 2020, MaxMem= 3221225472 cpu: 0.9 elap: 0.1
(Enter /public/apps/g16/l308.exe)
Leave Link 308 at Wed May 20 07:56:07 2020, MaxMem= 3221225472 cpu: 1.5 elap: 0.2
(Enter /public/apps/g16/l401.exe)
Initial guess from the checkpoint file: "CONF_2_ecd.chk"
B after Tr= 0.000000 -0.000000 -0.000000
Rot= 1.000000 -0.000000 -0.000000 0.000000 Ang= 0.00 deg.
Guess basis will be translated and rotated to current coordinates.
JPrj=2 DoOrth=T DoCkMO=T.
Leave Link 401 at Wed May 20 07:56:08 2020, MaxMem= 3221225472 cpu: 8.9 elap: 0.8
(Enter /public/apps/g16/l502.exe)
Integral symmetry usage will be decided dynamically.
Closed shell SCF:
Using DIIS extrapolation, IDIIS= 1040.
NGot= 3221225472 LenX= 3220290486 LenY= 3219830124
Requested convergence on RMS density matrix=1.00D-08 within 128 cycles.
Requested convergence on MAX density matrix=1.00D-06.
Requested convergence on energy=1.00D-06.
No special actions if energy rises.
Fock matrices will be formed incrementally for 20 cycles.
Cycle 1 Pass 1 IDiag 1:
FoFJK: IHMeth= 1 ICntrl= 0 DoSepK=F KAlg= 0 I1Cent= 0 FoldK=F
IRaf= 870000000 NMat= 1 IRICut= 1 DoRegI=T DoRafI=F ISym2E= 0 IDoP0=0 IntGTp=1.
FoFCou: FMM=F IPFlag= 0 FMFlag= 100000 FMFlg1= 0
NFxFlg= 0 DoJE=F BraDBF=F KetDBF=F FulRan=T
wScrn= 0.000000 ICntrl= 0 IOpCl= 0 I1Cent= 0 NGrid= 0
NMat0= 1 NMatS0= 1 NMatT0= 0 NMatD0= 1 NMtDS0= 0 NMtDT0= 0
Symmetry not used in FoFCou.
Inv3: Mode=1 IEnd= 17948748.
Iteration 1 A*A^-1 deviation from unit magnitude is 3.77D-15 for 567.
Iteration 1 A*A^-1 deviation from orthogonality is 2.98D-15 for 1834 614.
Iteration 1 A^-1*A deviation from unit magnitude is 3.55D-15 for 567.
Iteration 1 A^-1*A deviation from orthogonality is 4.97D-14 for 1839 1834.
E= -812.551531436761
DIIS: error= 5.13D-09 at cycle 1 NSaved= 1.
NSaved= 1 IEnMin= 1 EnMin= -812.551531436761 IErMin= 1 ErrMin= 5.13D-09
ErrMax= 5.13D-09 0.00D+00 EMaxC= 1.00D-01 BMatC= 3.59D-14 BMatP= 3.59D-14
IDIUse=1 WtCom= 1.00D+00 WtEn= 0.00D+00
Coeff-Com: 0.100D+01
Coeff: 0.100D+01
Gap= 0.247 Goal= None Shift= 0.000
RMSDP=2.23D-09 MaxDP=3.20D-07 OVMax= 2.29D-07
Error on total polarization charges = 0.04813
SCF Done: E(RAPFD) = -812.551531437 A.U. after 1 cycles
NFock= 1 Conv=0.22D-08 -V/T= 2.0045
KE= 8.089279081554D+02 PE=-4.939317940400D+03 EE= 1.795103657721D+03
Leave Link 502 at Wed May 20 07:56:39 2020, MaxMem= 3221225472 cpu: 371.2 elap: 31.4
(Enter /public/apps/g16/l801.exe)
DoSCS=F DFT=T ScalE2(SS,OS)= 1.000000 1.000000
ExpMin= 4.38D-02 ExpMax= 8.59D+03 ExpMxC= 1.30D+03 IAcc=3 IRadAn= 5 AccDes= 0.00D+00
HarFok: IExCor= 205 AccDes= 0.00D+00 IRadAn= 5 IDoV=-2 UseB2=F ITyADJ=14
ICtDFT= 12500011 ScaDFX= 1.000000 1.000000 1.000000 1.000000
Largest valence mixing into a core orbital is 5.60D-05
Largest core mixing into a valence orbital is 1.44D-05
Range of M.O.s used for correlation: 19 640
NBasis= 642 NAE= 70 NBE= 70 NFC= 18 NFV= 0
NROrb= 622 NOA= 52 NOB= 52 NVA= 570 NVB= 570
**** Warning!!: The largest alpha MO coefficient is 0.17230104D+03
Leave Link 801 at Wed May 20 07:56:40 2020, MaxMem= 3221225472 cpu: 2.4 elap: 0.3
(Enter /public/apps/g16/l914.exe)
RHF ground state
Two-electron integrals replicated using symmetry.
MDV= 3221225472 DFT=T DoStab=F Mixed=T DoRPA=T DoScal=F NonHer=T
NEqPCM: Using non-equilibrium solvation (IEInf=1, Eps= 32.6130, EpsInf= 1.7657)
Inv3: Mode=1 IEnd= 17948748.
Iteration 1 A*A^-1 deviation from unit magnitude is 3.11D-15 for 759.
Iteration 1 A*A^-1 deviation from orthogonality is 2.22D-15 for 2184 359.
Iteration 1 A^-1*A deviation from unit magnitude is 3.33D-15 for 600.
Iteration 1 A^-1*A deviation from orthogonality is 2.32D-15 for 2025 1204.
Making orbital integer symmetry assigments:
Orbital symmetries:
Occupied (A) (A) (A) (A) (A) (A) (A) (A) (A) (A) (A) (A)
(A) (A) (A) (A) (A) (A) (A) (A) (A) (A) (A) (A)
(A) (A) (A) (A) (A) (A) (A) (A) (A) (A) (A) (A)
(A) (A) (A) (A) (A) (A) (A) (A) (A) (A) (A) (A)
(A) (A) (A) (A) (A) (A) (A) (A) (A) (A) (A) (A)
(A) (A) (A) (A) (A) (A) (A) (A) (A) (A)
Virtual (A) (A) (A) (A) (A) (A) (A) (A) (A) (A) (A) (A)
(A) (A) (A) (A) (A) (A) (A) (A) (A) (A) (A) (A)
(A) (A) (A) (A) (A) (A) (A) (A) (A) (A) (A) (A)
(A) (A) (A) (A) (A) (A) (A) (A) (A) (A) (A) (A)
(A) (A) (A) (A) (A) (A) (A) (A) (A) (A) (A) (A)
(A) (A) (A) (A) (A) (A) (A) (A) (A) (A) (A) (A)
(A) (A) (A) (A) (A) (A) (A) (A) (A) (A) (A) (A)
(A) (A) (A) (A) (A) (A) (A) (A) (A) (A) (A) (A)
(A) (A) (A) (A) (A) (A) (A) (A) (A) (A) (A) (A)
(A) (A) (A) (A) (A) (A) (A) (A) (A) (A) (A) (A)
(A) (A) (A) (A) (A) (A) (A) (A) (A) (A) (A) (A)
(A) (A) (A) (A) (A) (A) (A) (A) (A) (A) (A) (A)
(A) (A) (A) (A) (A) (A) (A) (A) (A) (A) (A) (A)
(A) (A) (A) (A) (A) (A) (A) (A) (A) (A) (A) (A)
(A) (A) (A) (A) (A) (A) (A) (A) (A) (A) (A) (A)
(A) (A) (A) (A) (A) (A) (A) (A) (A) (A) (A) (A)
(A) (A) (A) (A) (A) (A) (A) (A) (A) (A) (A) (A)
(A) (A) (A) (A) (A) (A) (A) (A) (A) (A) (A) (A)
(A) (A) (A) (A) (A) (A) (A) (A) (A) (A) (A) (A)
(A) (A) (A) (A) (A) (A) (A) (A) (A) (A) (A) (A)
(A) (A) (A) (A) (A) (A) (A) (A) (A) (A) (A) (A)
(A) (A) (A) (A) (A) (A) (A) (A) (A) (A) (A) (A)
(A) (A) (A) (A) (A) (A) (A) (A) (A) (A) (A) (A)
(A) (A) (A) (A) (A) (A) (A) (A) (A) (A) (A) (A)
(A) (A) (A) (A) (A) (A) (A) (A) (A) (A) (A) (A)
(A) (A) (A) (A) (A) (A) (A) (A) (A) (A) (A) (A)
(A) (A) (A) (A) (A) (A) (A) (A) (A) (A) (A) (A)
(A) (A) (A) (A) (A) (A) (A) (A) (A) (A) (A) (A)
(A) (A) (A) (A) (A) (A) (A) (A) (A) (A) (A) (A)
(A) (A) (A) (A) (A) (A) (A) (A) (A) (A) (A) (A)
(A) (A) (A) (A) (A) (A) (A) (A) (A) (A) (A) (A)
(A) (A) (A) (A) (A) (A) (A) (A) (A) (A) (A) (A)
(A) (A) (A) (A) (A) (A) (A) (A) (A) (A) (A) (A)
(A) (A) (A) (A) (A) (A) (A) (A) (A) (A) (A) (A)
(A) (A) (A) (A) (A) (A) (A) (A) (A) (A) (A) (A)
(A) (A) (A) (A) (A) (A) (A) (A) (A) (A) (A) (A)
(A) (A) (A) (A) (A) (A) (A) (A) (A) (A) (A) (A)
(A) (A) (A) (A) (A) (A) (A) (A) (A) (A) (A) (A)
(A) (A) (A) (A) (A) (A) (A) (A) (A) (A) (A) (A)
(A) (A) (A) (A) (A) (A) (A) (A) (A) (A) (A) (A)
(A) (A) (A) (A) (A) (A) (A) (A) (A) (A) (A) (A)
(A) (A) (A) (A) (A) (A) (A) (A) (A) (A) (A) (A)
(A) (A) (A) (A) (A) (A) (A) (A) (A) (A) (A) (A)
(A) (A) (A) (A) (A) (A) (A) (A) (A) (A) (A) (A)
(A) (A) (A) (A) (A) (A) (A) (A) (A) (A) (A) (A)
(A) (A) (A) (A) (A) (A) (A) (A) (A) (A) (A) (A)
(A) (A) (A) (A) (A) (A) (A) (A) (A) (A) (A) (A)
(A) (A) (A) (A) (A) (A)
400 initial guesses have been made.
Convergence on wavefunction: 0.001000000000000
Davidson Disk Diagonalization: ConvIn= 1.00D-03 SkipCon=T Conv= 1.00D-03.
Max sub-space: 6000 roots to seek: 400 dimension of matrix: 59280
Iteration 1 Dimension 400 NMult 0 NNew 400
CISAX will form 204 AO SS matrices at one time.
NMat= 204 NSing= 204 JSym2X= 0.
FoFJK: IHMeth= 1 ICntrl= 0 DoSepK=F KAlg= 0 I1Cent= 0 FoldK=F
IRaf= 870000000 NMat= 408 IRICut= 510 DoRegI=T DoRafI=T ISym2E= 0 IDoP0=3 IntGTp=3.
NMat= 196 NSing= 196 JSym2X= 0.
New state 2 was old state 6
New state 6 was old state 11
New state 7 was old state 8
New state 8 was old state 10
New state 9 was old state 7
New state 10 was old state 15
New state 11 was old state 9
New state 12 was old state 17
New state 13 was old state 12
New state 14 was old state 13
New state 15 was old state 19
New state 16 was old state 14
New state 17 was old state 16
New state 19 was old state 20
New state 20 was old state 24
New state 21 was old state 22
New state 22 was old state 34
New state 23 was old state 25
New state 24 was old state 21
New state 25 was old state 26
New state 26 was old state 23
New state 28 was old state 30
New state 30 was old state 28
New state 31 was old state 32
New state 32 was old state 33
New state 33 was old state 31
New state 34 was old state 35
New state 35 was old state 43
No map to state 38
New state 40 was old state 38
New state 43 was old state 40
New state 44 was old state 55
New state 45 was old state 50
New state 46 was old state 48
New state 47 was old state 44
New state 48 was old state 45
New state 49 was old state 47
New state 50 was old state 46
New state 51 was old state 49
New state 52 was old state 59
New state 53 was old state 52
New state 54 was old state 58
New state 55 was old state 56
New state 56 was old state 53
New state 57 was old state 51
New state 58 was old state 54
New state 59 was old state 70
New state 61 was old state 62
New state 62 was old state 57
New state 63 was old state 61
New state 64 was old state 63
New state 65 was old state 64
New state 66 was old state 68
New state 67 was old state 69
New state 68 was old state 67
New state 69 was old state 78
New state 70 was old state 65
New state 71 was old state 92
New state 72 was old state 71
New state 73 was old state 80
New state 74 was old state 72
New state 75 was old state 73
New state 76 was old state 75
New state 77 was old state 79
New state 78 was old state 76
New state 79 was old state 77
New state 80 was old state 81
New state 81 was old state 74
New state 82 was old state 85
New state 83 was old state 98
New state 84 was old state 82
New state 85 was old state 83
New state 88 was old state 93
New state 89 was old state 91
New state 90 was old state 88
New state 91 was old state 84
New state 92 was old state 95
New state 93 was old state 90
New state 94 was old state 89
New state 95 was old state 108
New state 96 was old state 101
New state 97 was old state 121
New state 98 was old state 94
New state 99 was old state 96
New state 100 was old state 103
Excitation Energies [eV] at current iteration:
Root 1 : 6.014412953011028
Root 2 : 6.435996032629910
Root 3 : 6.490803087622939
Root 4 : 6.569065788251929
Root 5 : 6.624494804144334
Root 6 : 6.796569079563617
Root 7 : 6.844635095876294
Root 8 : 6.881682913953018
Root 9 : 6.957978332640809
Root 10 : 6.981448262062565
Root 11 : 7.030513795057101
Root 12 : 7.080994600722236
Root 13 : 7.142240663069064
Root 14 : 7.161626392756856
Root 15 : 7.241691255996529
Root 16 : 7.286467138592114
Root 17 : 7.347755740487261
Root 18 : 7.362130591277392
Root 19 : 7.380601884582657
Root 20 : 7.411578596888742
Root 21 : 7.501410575005155
Root 22 : 7.538071100707398
Root 23 : 7.549488880572961
Root 24 : 7.608212103466109
Root 25 : 7.620997353488123
Root 26 : 7.646113222085009
Root 27 : 7.653731064758075
Root 28 : 7.723265715075523
Root 29 : 7.733151596164475
Root 30 : 7.751653357665600
Root 31 : 7.755311999718334
Root 32 : 7.762323996521586
Root 33 : 7.803709565510384
Root 34 : 7.824679837441217
Root 35 : 7.830080110062400
Root 36 : 7.838920101377354
Root 37 : 7.848642681956829
Root 38 : 7.875266867367198
Root 39 : 7.909239495937443
Root 40 : 7.967530281907123
Root 41 : 8.000738455398340
Root 42 : 8.039074515102467
Root 43 : 8.055545931010952
Root 44 : 8.061750015419610
Root 45 : 8.095917726979350
Root 46 : 8.106637446057515
Root 47 : 8.127388313397393
Root 48 : 8.145441975758221
Root 49 : 8.149156230119706
Root 50 : 8.170610616672329
Root 51 : 8.202267191699876
Root 52 : 8.223663436904364
Root 53 : 8.234549992578632
Root 54 : 8.250780790903216
Root 55 : 8.281181158126426
Root 56 : 8.298506365905297
Root 57 : 8.302461755610960
Root 58 : 8.336470630223552
Root 59 : 8.359077054710731
Root 60 : 8.374209649230707
Root 61 : 8.388203434609613
Root 62 : 8.399901611698400
Root 63 : 8.421083856553077
Root 64 : 8.425804117960093
Root 65 : 8.462647272302728
Root 66 : 8.475155713665311
Root 67 : 8.484133305691801
Root 68 : 8.493656950428775
Root 69 : 8.499922674752185
Root 70 : 8.522250348316415
Root 71 : 8.536070060415319
Root 72 : 8.546334046082759
Root 73 : 8.575827651484374
Root 74 : 8.588245579769648
Root 75 : 8.598252508250743
Root 76 : 8.606029588884907
Root 77 : 8.608700265344760
Root 78 : 8.633831587084893
Root 79 : 8.647169416400656
Root 80 : 8.652880267192732
Root 81 : 8.675576802149120
Root 82 : 8.686659232350138
Root 83 : 8.693916933523850
Root 84 : 8.725181750080157
Root 85 : 8.739523772541299
Root 86 : 8.756444478900336
Root 87 : 8.793717725557489
Root 88 : 8.800709273316773
Root 89 : 8.807512715191042
Root 90 : 8.823125922374130
Root 91 : 8.831760201674724
Root 92 : 8.854694036311679
Root 93 : 8.860412060988683
Root 94 : 8.867155858146102
Root 95 : 8.883500205494933
Root 96 : 8.884851784568697
Root 97 : 8.900254840007610
Root 98 : 8.912162876507875
Root 99 : 8.917856194230295
Root 100 : 8.923795930758336
Root 101 : 8.944414563762466
Root 102 : 8.956364646884813
Root 103 : 8.963222568140012
Root 104 : 8.966334355434043
Root 105 : 8.981990558914728
Root 106 : 8.990927426326506
Root 107 : 9.004882478140608
Root 108 : 9.012854792930055
Root 109 : 9.027039809848402
Root 110 : 9.036864848668104
Root 111 : 9.042045651700732
Root 112 : 9.048935336014846
Root 113 : 9.068491144297939
Root 114 : 9.074261747056722
Root 115 : 9.088145133615804
Root 116 : 9.096653357281959
Root 117 : 9.115757215280389
Root 118 : 9.123145419892385
Root 119 : 9.123802496643451
Root 120 : 9.144359036171441
Root 121 : 9.152559490942814
Root 122 : 9.163065502368950
Root 123 : 9.169131547928883
Root 124 : 9.188788506037685
Root 125 : 9.209171135454149
Root 126 : 9.215280321177481
Root 127 : 9.229231729021292
Root 128 : 9.236073078371490
Root 129 : 9.241739104629135
Root 130 : 9.247135098669776
Root 131 : 9.250848781491083
Root 132 : 9.265264531038765
Root 133 : 9.275540655470842
Root 134 : 9.278060086806532
Root 135 : 9.287162930006600
Root 136 : 9.296511089517233
Root 137 : 9.299507010389540
Root 138 : 9.310158268104029
Root 139 : 9.323101697545754
Root 140 : 9.330201924308536
Root 141 : 9.345584533748411
Root 142 : 9.365163977843032
Root 143 : 9.370453194616555
Root 144 : 9.374969810506231
Root 145 : 9.388084691972798
Root 146 : 9.399147993099973
Root 147 : 9.414266307459407
Root 148 : 9.421591509191034
Root 149 : 9.427078108284963
Root 150 : 9.441712287198515
Root 151 : 9.448945729346260
Root 152 : 9.457927619309737
Root 153 : 9.460441864542693
Root 154 : 9.476483943847892
Root 155 : 9.485495268836043
Root 156 : 9.489232262920206
Root 157 : 9.506552474829761
Root 158 : 9.510514230483206
Root 159 : 9.522739084826592
Root 160 : 9.534279555319372
Root 161 : 9.537119729264749
Root 162 : 9.548235797180842
Root 163 : 9.557303776947125
Root 164 : 9.562732673536500
Root 165 : 9.572373328851272
Root 166 : 9.579032249321568
Root 167 : 9.579562548253353
Root 168 : 9.583594679946296
Root 169 : 9.591286864664662
Root 170 : 9.598281434300876
Root 171 : 9.602767339741039
Root 172 : 9.614627644390454
Root 173 : 9.622271153412063
Root 174 : 9.628845917442915
Root 175 : 9.633818834889128
Root 176 : 9.650710754951033
Root 177 : 9.653551590865908
Root 178 : 9.666448673426061
Root 179 : 9.684248688389799
Root 180 : 9.687107642422733
Root 181 : 9.697502804293809
Root 182 : 9.703326149433201
Root 183 : 9.715656984848666
Root 184 : 9.722837076217569
Root 185 : 9.725084385593883
Root 186 : 9.737311529383508
Root 187 : 9.744626229996310
Root 188 : 9.747876936761712
Root 189 : 9.752744634661250
Root 190 : 9.764042549924945
Root 191 : 9.770184888481760
Root 192 : 9.772888880100844
Root 193 : 9.778886092978581
Root 194 : 9.792974869422583
Root 195 : 9.795125034260558
Root 196 : 9.804727594362292
Root 197 : 9.810278877766361
Root 198 : 9.815840348992028
Root 199 : 9.830976877815617
Root 200 : 9.837288656247408
Root 201 : 9.838447517716235
Root 202 : 9.847686804999316
Root 203 : 9.849063105722969
Root 204 : 9.865615606010227
Root 205 : 9.870119474962078
Root 206 : 9.871729057709365
Root 207 : 9.884195877292255
Root 208 : 9.898813594614376
Root 209 : 9.906192371280708
Root 210 : 9.918423514755757
Root 211 : 9.920068427885298
Root 212 : 9.930750245272023
Root 213 : 9.942958495805762
Root 214 : 9.950846311876676
Root 215 : 9.963648884025263
Root 216 : 9.972988022170423
Root 217 : 9.981391038902244
Root 218 : 9.982551326976251
Root 219 : 9.995508262243764
Root 220 : 9.997202235984314
Root 221 : 10.007762225752904
Root 222 : 10.019130654784457
Root 223 : 10.031802726709168
Root 224 : 10.038573685030073
Root 225 : 10.049339845569042
Root 226 : 10.052014538266990
Root 227 : 10.056580870270103
Root 228 : 10.059247228727173
Root 229 : 10.072823441860944
Root 230 : 10.075789228498888
Root 231 : 10.084392176234244
Root 232 : 10.091701626099004
Root 233 : 10.096194757639681
Root 234 : 10.103338127046898
Root 235 : 10.112143671580109
Root 236 : 10.117995213601461
Root 237 : 10.118407064671983
Root 238 : 10.121648714465499
Root 239 : 10.135053224729759
Root 240 : 10.140799437715835
Root 241 : 10.143232719890705
Root 242 : 10.152384179991360
Root 243 : 10.158795864087747
Root 244 : 10.160044307034280
Root 245 : 10.166039430543446
Root 246 : 10.178774931122915
Root 247 : 10.186080476132403
Root 248 : 10.195761708311966
Root 249 : 10.204415434915045
Root 250 : 10.213382032654728
Root 251 : 10.214562282277631
Root 252 : 10.221463061714859
Root 253 : 10.230785580602385
Root 254 : 10.233850998571356
Root 255 : 10.245056722289263
Root 256 : 10.246634639490528
Root 257 : 10.254901409026346
Root 258 : 10.258936049072249
Root 259 : 10.264915489549654
Root 260 : 10.278287039161818
Root 261 : 10.281112208676532
Root 262 : 10.284804281869224
Root 263 : 10.289059749233576
Root 264 : 10.299180962442634
Root 265 : 10.302453523808406
Root 266 : 10.302977724873816
Root 267 : 10.308406907049974
Root 268 : 10.315921858477214
Root 269 : 10.319946202050902
Root 270 : 10.326599565590342
Root 271 : 10.337804743692169
Root 272 : 10.341074520064907
Root 273 : 10.347383293495087
Root 274 : 10.350866340819961
Root 275 : 10.362064638724878
Root 276 : 10.364187732314457
Root 277 : 10.367859923247210
Root 278 : 10.372883716062715
Root 279 : 10.381131374464115
Root 280 : 10.382939321437712
Root 281 : 10.395413562192935
Root 282 : 10.397766846396593
Root 283 : 10.403015241338505
Root 284 : 10.404383833143795
Root 285 : 10.417089596179160
Root 286 : 10.424454315742990
Root 287 : 10.434942388562089
Root 288 : 10.445389743613331
Root 289 : 10.454156459375858
Root 290 : 10.462719610701745
Root 291 : 10.468052601775458
Root 292 : 10.477094000457416
Root 293 : 10.480991400602656
Root 294 : 10.484275362665487
Root 295 : 10.492211477323512
Root 296 : 10.494409975026736
Root 297 : 10.503195616760918
Root 298 : 10.505651731537339
Root 299 : 10.516742384211774
Root 300 : 10.520676398702387
Root 301 : 10.528840077179737
Root 302 : 10.536065466301219
Root 303 : 10.538856624945133
Root 304 : 10.548162031464242
Root 305 : 10.554463555055436
Root 306 : 10.557191213937973
Root 307 : 10.565449808415147
Root 308 : 10.566609469369437
Root 309 : 10.567884990934859
Root 310 : 10.573707730994597
Root 311 : 10.584153042825927
Root 312 : 10.588905312886061
Root 313 : 10.597668087375688
Root 314 : 10.599902141594663
Root 315 : 10.608898830693462
Root 316 : 10.621924922658572
Root 317 : 10.626878453580151
Root 318 : 10.632275925400966
Root 319 : 10.634851207821551
Root 320 : 10.641598673951098
Root 321 : 10.647537704491041
Root 322 : 10.652002502956826
Root 323 : 10.659832144004506
Root 324 : 10.668247853434284
Root 325 : 10.673374763758011
Root 326 : 10.678343901872719
Root 327 : 10.680838204463786
Root 328 : 10.683204540276508
Root 329 : 10.690337058928170
Root 330 : 10.696899399740582
Root 331 : 10.703029511450803
Root 332 : 10.705363793124084
Root 333 : 10.708172373900585
Root 334 : 10.715724604152365
Root 335 : 10.721210248860087
Root 336 : 10.724795567092665
Root 337 : 10.726719929304089
Root 338 : 10.735760270837265
Root 339 : 10.736972708436554
Root 340 : 10.743350744248449
Root 341 : 10.748158323437956
Root 342 : 10.750170524482472
Root 343 : 10.758354562318038
Root 344 : 10.766810115911431
Root 345 : 10.774159042187989
Root 346 : 10.782493192689417
Root 347 : 10.790032098887551
Root 348 : 10.796295870178600
Root 349 : 10.797441732836056
Root 350 : 10.808881922690130
Root 351 : 10.811157531275613
Root 352 : 10.814573057662372
Root 353 : 10.819341054532357
Root 354 : 10.823397594537216
Root 355 : 10.830802272513402
Root 356 : 10.835106318804486
Root 357 : 10.837649439044531
Root 358 : 10.842990269622893
Root 359 : 10.846386120862460
Root 360 : 10.850960318592460
Root 361 : 10.853593459736485
Root 362 : 10.862617569291734
Root 363 : 10.865415594339627
Root 364 : 10.877460266876499
Root 365 : 10.883491201562082
Root 366 : 10.884743726399428
Root 367 : 10.893010634753631
Root 368 : 10.895792531101616
Root 369 : 10.903175589864265
Root 370 : 10.907943275365394
Root 371 : 10.912734782531366
Root 372 : 10.914782757403289
Root 373 : 10.917990468217454
Root 374 : 10.927727517896171
Root 375 : 10.931338358996959
Root 376 : 10.935852744325253
Root 377 : 10.937034992186840
Root 378 : 10.945666004680795
Root 379 : 10.948715499972176
Root 380 : 10.955936947552118
Root 381 : 10.963576440750352
Root 382 : 10.966638005648646
Root 383 : 10.968399294301287
Root 384 : 10.973350143464602
Root 385 : 10.978501138344484
Root 386 : 10.986383498700059
Root 387 : 10.988641204030797
Root 388 : 10.997984716499587
Root 389 : 11.003526719212351
Root 390 : 11.012483243982087
Root 391 : 11.021087483913057
Root 392 : 11.021682575039787
Root 393 : 11.030035739747397
Root 394 : 11.034044721632238
Root 395 : 11.037515619253320
Root 396 : 11.043441419942651
Root 397 : 11.053326216554970
Root 398 : 11.060229439796174
Root 399 : 11.075906353651424
Root 400 : 11.089884856413811
Iteration 2 Dimension 600 NMult 400 NNew 200
CISAX will form 200 AO SS matrices at one time.
NMat= 200 NSing= 200 JSym2X= 0.
Root 1 not converged, maximum delta is 0.160672307104938
Root 2 not converged, maximum delta is 0.392144692319914
Root 3 not converged, maximum delta is 0.514423558338101
Root 4 not converged, maximum delta is 0.472641689673964
Root 5 not converged, maximum delta is 0.397713643156374
Root 6 not converged, maximum delta is 0.314245696412652
Root 7 not converged, maximum delta is 0.348653543256345
Root 8 not converged, maximum delta is 0.118995959773107
Root 9 not converged, maximum delta is 0.088423173443133
Root 10 not converged, maximum delta is 0.155524748318032
Root 11 not converged, maximum delta is 0.360336640757796
Root 12 not converged, maximum delta is 0.302508287333882
Root 13 not converged, maximum delta is 0.175566678807372
Root 14 not converged, maximum delta is 0.058771650424806
Root 15 not converged, maximum delta is 0.348308680572805
New state 16 was old state 19
Root 16 not converged, maximum delta is 0.326228779188602
New state 17 was old state 16
Root 17 not converged, maximum delta is 0.158244249255497
New state 18 was old state 17
Root 18 not converged, maximum delta is 0.064821533018802
New state 19 was old state 18
Root 19 not converged, maximum delta is 0.219503722097108
Root 20 not converged, maximum delta is 0.069673196711711
New state 21 was old state 22
Root 21 not converged, maximum delta is 0.288203027582619
New state 22 was old state 21
Root 22 not converged, maximum delta is 0.371364590704346
Root 23 not converged, maximum delta is 0.092114509806979
Root 24 not converged, maximum delta is 0.043112635369159
Root 25 not converged, maximum delta is 0.067379384359492
Root 26 not converged, maximum delta is 0.104883621147102
Root 27 not converged, maximum delta is 0.080890097487287
New state 28 was old state 29
Root 28 not converged, maximum delta is 0.348356787578780
New state 29 was old state 28
Root 29 not converged, maximum delta is 0.236826479543906
New state 30 was old state 31
Root 30 not converged, maximum delta is 0.290054925153220
New state 31 was old state 30
Root 31 not converged, maximum delta is 0.217377510524752
Root 32 not converged, maximum delta is 0.119448245797773
Root 33 not converged, maximum delta is 0.090720488085141
New state 34 was old state 35
Root 34 not converged, maximum delta is 0.342659351811968
New state 35 was old state 34
Root 35 not converged, maximum delta is 0.328632012351821
Root 36 not converged, maximum delta is 0.147138250251020
Root 37 not converged, maximum delta is 0.052639915668011
Root 38 not converged, maximum delta is 0.093519394354389
Root 39 not converged, maximum delta is 0.021048898915991
Root 40 not converged, maximum delta is 0.208357240152330
Root 41 not converged, maximum delta is 0.181292113790036
Root 42 not converged, maximum delta is 0.159268143850820
New state 43 was old state 44
Root 43 not converged, maximum delta is 0.180364116160437
New state 44 was old state 43
Root 44 not converged, maximum delta is 0.062591075027518
Root 45 not converged, maximum delta is 0.078403234486276
Root 46 not converged, maximum delta is 0.134722607233733
Root 47 not converged, maximum delta is 0.058770525898177
Root 48 not converged, maximum delta is 0.149255828055828
Root 49 not converged, maximum delta is 0.148016691303217
Root 50 not converged, maximum delta is 0.080095926528608
New state 51 was old state 52
Root 51 not converged, maximum delta is 0.222890288550690
New state 52 was old state 51
Root 52 not converged, maximum delta is 0.203470197533843
Root 53 not converged, maximum delta is 0.109152234614428
Root 54 not converged, maximum delta is 0.106482676855235
Root 55 not converged, maximum delta is 0.141627426729928
Root 56 not converged, maximum delta is 0.079264141228408
Root 57 not converged, maximum delta is 0.067688983571383
New state 58 was old state 59
Root 58 not converged, maximum delta is 0.350206271332907
New state 59 was old state 58
Root 59 not converged, maximum delta is 0.279869839242843
Root 60 not converged, maximum delta is 0.164442865459720
Root 61 not converged, maximum delta is 0.118173987669001
Root 62 not converged, maximum delta is 0.134185317815545
Root 63 not converged, maximum delta is 0.117564242710315
Root 64 not converged, maximum delta is 0.121803667336842
Root 65 not converged, maximum delta is 0.109910515084513
Root 66 not converged, maximum delta is 0.173429550245283
Root 67 not converged, maximum delta is 0.168929399364813
New state 68 was old state 69
Root 68 not converged, maximum delta is 0.186358843864854
New state 69 was old state 68
Root 69 not converged, maximum delta is 0.095683423087584
New state 70 was old state 71
Root 70 not converged, maximum delta is 0.332317471273475
New state 71 was old state 70
Root 71 not converged, maximum delta is 0.208864429111288
Root 72 not converged, maximum delta is 0.239274874461647
Root 73 not converged, maximum delta is 0.208364423542546
New state 74 was old state 76
Root 74 not converged, maximum delta is 0.444422217565178
Root 75 not converged, maximum delta is 0.444852506211786
New state 76 was old state 77
Root 76 not converged, maximum delta is 0.317288645418912
New state 77 was old state 74
Root 77 not converged, maximum delta is 0.508121435143952
Root 78 not converged, maximum delta is 0.118477202177365
Root 79 not converged, maximum delta is 0.273428859493893
Root 80 not converged, maximum delta is 0.209887598390082
Root 81 not converged, maximum delta is 0.280165589908002
Root 82 not converged, maximum delta is 0.242068012696597
Root 83 not converged, maximum delta is 0.098323302582920
Root 84 not converged, maximum delta is 0.039049839485517
Root 85 not converged, maximum delta is 0.289160676334626
Root 86 not converged, maximum delta is 0.321250410496155
New state 87 was old state 88
Root 87 not converged, maximum delta is 0.129725314739190
New state 88 was old state 87
Root 88 not converged, maximum delta is 0.117138791437819
Root 89 not converged, maximum delta is 0.160838574855160
Root 90 not converged, maximum delta is 0.345514259868749
Root 91 not converged, maximum delta is 0.460360385459191
Root 92 not converged, maximum delta is 0.376081830501916
New state 93 was old state 94
Root 93 not converged, maximum delta is 0.270644754041238
New state 94 was old state 93
Root 94 not converged, maximum delta is 0.055672949394599
Root 95 not converged, maximum delta is 0.375444325572196
Root 96 not converged, maximum delta is 0.262759376658264
Root 97 not converged, maximum delta is 0.159013214207327
Root 98 not converged, maximum delta is 0.141005851038620
Root 99 not converged, maximum delta is 0.176653429551272
Root 100 not converged, maximum delta is 0.198650398895696
Excitation Energies [eV] at current iteration:
Root 1 : 5.928535697977398 Change is -0.085877255033630
Root 2 : 6.365953180232175 Change is -0.070042852397735
Root 3 : 6.417524618361204 Change is -0.073278469261735
Root 4 : 6.492296083492842 Change is -0.076769704759087
Root 5 : 6.587213041117070 Change is -0.037281763027264
Root 6 : 6.680344463804646 Change is -0.116224615758971
Root 7 : 6.785507897334090 Change is -0.059127198542204
Root 8 : 6.835872942015584 Change is -0.045809971937434
Root 9 : 6.934249972077350 Change is -0.023728360563460
Root 10 : 6.962701272995604 Change is -0.018746989066961
Root 11 : 6.998748176768124 Change is -0.031765618288978
Root 12 : 7.033349672170989 Change is -0.047644928551246
Root 13 : 7.109215323227221 Change is -0.033025339841843
Root 14 : 7.147092899605859 Change is -0.014533493150997
Root 15 : 7.192166597145103 Change is -0.049524658851426
Root 16 : 7.235153700541574 Change is -0.145448184041084
Root 17 : 7.271973229988248 Change is -0.014493908603866
Root 18 : 7.324389741614728 Change is -0.023365998872533
Root 19 : 7.356937729605137 Change is -0.005192861672255
Root 20 : 7.383209376479382 Change is -0.028369220409359
Root 21 : 7.441157932130539 Change is -0.096913168576859
Root 22 : 7.485490296868123 Change is -0.015920278137032
Root 23 : 7.519480380361660 Change is -0.030008500211300
Root 24 : 7.586602489798505 Change is -0.021609613667604
Root 25 : 7.595379177893955 Change is -0.025618175594168
Root 26 : 7.619529559451289 Change is -0.026583662633720
Root 27 : 7.634378722603709 Change is -0.019352342154366
Root 28 : 7.706580462411109 Change is -0.026571133753366
Root 29 : 7.709023363901333 Change is -0.014242351174190
Root 30 : 7.734470729673397 Change is -0.020841270044937
Root 31 : 7.739840622544254 Change is -0.011812735121346
Root 32 : 7.745517675950890 Change is -0.016806320570696
Root 33 : 7.779536354627670 Change is -0.024173210882714
Root 34 : 7.787605393886893 Change is -0.042474716175507
Root 35 : 7.803001877231210 Change is -0.021677960210007
Root 36 : 7.821044918219010 Change is -0.017875183158343
Root 37 : 7.829793065962490 Change is -0.018849615994339
Root 38 : 7.854725215034834 Change is -0.020541652332365
Root 39 : 7.886600554588418 Change is -0.022638941349025
Root 40 : 7.936012969896159 Change is -0.031517312010965
Root 41 : 7.980333714892819 Change is -0.020404740505522
Root 42 : 7.990209838711879 Change is -0.048864676390588
Root 43 : 8.015603671159571 Change is -0.046146344260041
Root 44 : 8.041904408207955 Change is -0.013641522802996
Root 45 : 8.066063937977571 Change is -0.029853789001778
Root 46 : 8.078394374990033 Change is -0.028243071067481
Root 47 : 8.111658981127221 Change is -0.015729332270173
Root 48 : 8.122388858322338 Change is -0.023053117435883
Root 49 : 8.129714621667045 Change is -0.019441608452661
Root 50 : 8.150595977007260 Change is -0.020014639665070
Root 51 : 8.164771368202798 Change is -0.058892068701566
Root 52 : 8.178656745545053 Change is -0.023610446154824
Root 53 : 8.210294229652176 Change is -0.024255762926457
Root 54 : 8.224268942350848 Change is -0.026511848552368
Root 55 : 8.258653080684567 Change is -0.022528077441859
Root 56 : 8.271469608629678 Change is -0.027036757275619
Root 57 : 8.279321688901137 Change is -0.023140066709823
Root 58 : 8.316026085775109 Change is -0.043050968935622
Root 59 : 8.320873448932446 Change is -0.015597181291107
Root 60 : 8.349354844798594 Change is -0.024854804432113
Root 61 : 8.368600674176879 Change is -0.019602760432735
Root 62 : 8.377960680976043 Change is -0.021940930722357
Root 63 : 8.403029619650686 Change is -0.018054236902390
Root 64 : 8.407613375198688 Change is -0.018190742761405
Root 65 : 8.441889469266926 Change is -0.020757803035804
Root 66 : 8.445125327847427 Change is -0.030030385817885
Root 67 : 8.458486749614108 Change is -0.025646556077693
Root 68 : 8.470114585901744 Change is -0.029808088850440
Root 69 : 8.470915597027885 Change is -0.022741353400891
Root 70 : 8.489902222340053 Change is -0.046167838075265
Root 71 : 8.509558976667256 Change is -0.012691371649159
Root 72 : 8.520509890962813 Change is -0.025824155119945
Root 73 : 8.541668874877137 Change is -0.034158776607238
Root 74 : 8.554787512657626 Change is -0.051242076227280
Root 75 : 8.567058802671580 Change is -0.031193705579164
Root 76 : 8.567686522869986 Change is -0.041013742474774
Root 77 : 8.581755612215227 Change is -0.006489967554421
Root 78 : 8.608059887512228 Change is -0.025771699572665
Root 79 : 8.620432984011694 Change is -0.026736432388961
Root 80 : 8.626807918392196 Change is -0.026072348800537
Root 81 : 8.641518379428557 Change is -0.034058422720564
Root 82 : 8.662551564136420 Change is -0.024107668213717
Root 83 : 8.671783812162650 Change is -0.022133121361201
Root 84 : 8.702161476309758 Change is -0.023020273770399
Root 85 : 8.718972755228606 Change is -0.020551017312693
Root 86 : 8.727479945253748 Change is -0.028964533646588
Root 87 : 8.763290931620045 Change is -0.037418341696729
Root 88 : 8.771112628968778 Change is -0.022605096588710
Root 89 : 8.772551784901729 Change is -0.034960930289312
Root 90 : 8.786474054903747 Change is -0.036651867470383
Root 91 : 8.806062473711926 Change is -0.025697727962799
Root 92 : 8.816303867518897 Change is -0.038390168792782
Root 93 : 8.830924939553281 Change is -0.036230918592821
Root 94 : 8.837862410822677 Change is -0.022549650166006
Root 95 : 8.841705899076205 Change is -0.041794306418727
Root 96 : 8.860188910176502 Change is -0.024662874392196
Root 97 : 8.872654441489928 Change is -0.027600398517683
Root 98 : 8.890101978766628 Change is -0.022060897741247
Root 99 : 8.894746863128573 Change is -0.023109331101722
Root 100 : 8.895676911383148 Change is -0.028119019375189
Iteration 3 Dimension 800 NMult 600 NNew 200
CISAX will form 200 AO SS matrices at one time.
NMat= 200 NSing= 200 JSym2X= 0.
Root 1 not converged, maximum delta is 0.003772770354768
Root 2 not converged, maximum delta is 0.014932852529781
Root 3 not converged, maximum delta is 0.009923704732203
Root 4 not converged, maximum delta is 0.006358764412330
Root 5 not converged, maximum delta is 0.002835824041228
Root 6 not converged, maximum delta is 0.003559482009903
Root 7 not converged, maximum delta is 0.001898680819409
Root 8 not converged, maximum delta is 0.001549341416035
Root 9 not converged, maximum delta is 0.001533781764379
Root 10 not converged, maximum delta is 0.005288961301186
Root 11 not converged, maximum delta is 0.007278893866772
Root 12 not converged, maximum delta is 0.004129495074975
Root 13 not converged, maximum delta is 0.002613841775637
Root 14 not converged, maximum delta is 0.001444627221185
Root 15 not converged, maximum delta is 0.007321663138350
Root 16 not converged, maximum delta is 0.005856138445619
Root 17 not converged, maximum delta is 0.003658093135291
Root 18 not converged, maximum delta is 0.002064861307392
Root 19 not converged, maximum delta is 0.001039333402500
Root 20 not converged, maximum delta is 0.001694142873825
Root 21 not converged, maximum delta is 0.001988651472941
Root 22 not converged, maximum delta is 0.003035088914838
Root 23 not converged, maximum delta is 0.002187758705393
Root 24 not converged, maximum delta is 0.001804572113325
Root 25 not converged, maximum delta is 0.001910771482846
Root 26 not converged, maximum delta is 0.001646290294012
Root 27 not converged, maximum delta is 0.001074070955856
Root 28 not converged, maximum delta is 0.008104112652608
Root 29 not converged, maximum delta is 0.009375952551573
Root 30 not converged, maximum delta is 0.001673938631669
Root 31 not converged, maximum delta is 0.001548396882742
Root 32 not converged, maximum delta is 0.001369646124544
Root 33 not converged, maximum delta is 0.012260762420719
Root 34 not converged, maximum delta is 0.010128360797729
Root 35 not converged, maximum delta is 0.002554693361957
Root 36 not converged, maximum delta is 0.001789658469264
Root 37 not converged, maximum delta is 0.001202505237441
Root 38 not converged, maximum delta is 0.002418751172282
Root 39 not converged, maximum delta is 0.001045447671643
Root 40 not converged, maximum delta is 0.003933912497555
Root 41 not converged, maximum delta is 0.008693838903169
Root 42 not converged, maximum delta is 0.005603295158456
Root 43 not converged, maximum delta is 0.003387773344425
Root 44 has converged.
Root 45 not converged, maximum delta is 0.002559181099040
Root 46 not converged, maximum delta is 0.003425501517800
Root 47 not converged, maximum delta is 0.002680130676463
Root 48 not converged, maximum delta is 0.004677301501148
Root 49 not converged, maximum delta is 0.003687440610307
Root 50 not converged, maximum delta is 0.001783303332388
Root 51 not converged, maximum delta is 0.007177029081878
Root 52 not converged, maximum delta is 0.005551841592352
Root 53 not converged, maximum delta is 0.001753063756334
Root 54 not converged, maximum delta is 0.002072088588893
Root 55 not converged, maximum delta is 0.002450836132999
Root 56 not converged, maximum delta is 0.006339358922203
Root 57 not converged, maximum delta is 0.007703730985065
Root 58 not converged, maximum delta is 0.021634759852547
Root 59 not converged, maximum delta is 0.018560972694361
Root 60 not converged, maximum delta is 0.002272713410431
Root 61 not converged, maximum delta is 0.001813493192378
Root 62 not converged, maximum delta is 0.002148376622512
Root 63 not converged, maximum delta is 0.001826741674913
Root 64 not converged, maximum delta is 0.001623260229645
Root 65 not converged, maximum delta is 0.023085146408470
Root 66 not converged, maximum delta is 0.036756424073322
Root 67 not converged, maximum delta is 0.006352903234803
Root 68 not converged, maximum delta is 0.012433777272190
Root 69 not converged, maximum delta is 0.007510132977293
Root 70 not converged, maximum delta is 0.005857590925286
Root 71 not converged, maximum delta is 0.004590181024740
Root 72 not converged, maximum delta is 0.006856132442594
Root 73 not converged, maximum delta is 0.004485034720541
Root 74 not converged, maximum delta is 0.004797254559303
Root 75 not converged, maximum delta is 0.140502823323471
Root 76 not converged, maximum delta is 0.111353382439704
Root 77 not converged, maximum delta is 0.002680973825705
Root 78 not converged, maximum delta is 0.003867104131070
Root 79 not converged, maximum delta is 0.005881854263270
Root 80 not converged, maximum delta is 0.004581654222138
Root 81 not converged, maximum delta is 0.003968171322682
Root 82 not converged, maximum delta is 0.001589693397208
Root 83 not converged, maximum delta is 0.001213532805458
Root 84 not converged, maximum delta is 0.001812424733772
Root 85 not converged, maximum delta is 0.013481156161882
Root 86 not converged, maximum delta is 0.015216450869495
Root 87 not converged, maximum delta is 0.009506188402500
Root 88 not converged, maximum delta is 0.095286866163695
Root 89 not converged, maximum delta is 0.117721738866033
Root 90 not converged, maximum delta is 0.028976704364320
Root 91 not converged, maximum delta is 0.023048641980664
Root 92 not converged, maximum delta is 0.016037529756155
Root 93 not converged, maximum delta is 0.013740951956584
Root 94 not converged, maximum delta is 0.007800329132508
Root 95 not converged, maximum delta is 0.008523364027526
Root 96 not converged, maximum delta is 0.004091970980745
Root 97 not converged, maximum delta is 0.004630408845084
Root 98 not converged, maximum delta is 0.012829275202318
Root 99 not converged, maximum delta is 0.049302251216224
Root 100 not converged, maximum delta is 0.060507919230725
Excitation Energies [eV] at current iteration:
Root 1 : 5.926435305228305 Change is -0.002100392749093
Root 2 : 6.363187736780993 Change is -0.002765443451183
Root 3 : 6.416231807798486 Change is -0.001292810562718
Root 4 : 6.491273094887448 Change is -0.001022988605394
Root 5 : 6.586873761994698 Change is -0.000339279122372
Root 6 : 6.679127894451786 Change is -0.001216569352860
Root 7 : 6.784546452113410 Change is -0.000961445220680
Root 8 : 6.835054005533935 Change is -0.000818936481649
Root 9 : 6.933783794314239 Change is -0.000466177763110
Root 10 : 6.962194207556177 Change is -0.000507065439427
Root 11 : 6.997964430861167 Change is -0.000783745906956
Root 12 : 7.032913929002877 Change is -0.000435743168113
Root 13 : 7.108600802676774 Change is -0.000614520550447
Root 14 : 7.146817265699968 Change is -0.000275633905890
Root 15 : 7.191131271421502 Change is -0.001035325723601
Root 16 : 7.233986843725564 Change is -0.001166856816010
Root 17 : 7.271511037207219 Change is -0.000462192781029
Root 18 : 7.323933897895721 Change is -0.000455843719007
Root 19 : 7.356736406856049 Change is -0.000201322749088
Root 20 : 7.382556082936991 Change is -0.000653293542391
Root 21 : 7.440084210014562 Change is -0.001073722115978
Root 22 : 7.484858580744873 Change is -0.000631716123250
Root 23 : 7.518906014594299 Change is -0.000574365767362
Root 24 : 7.586168252472453 Change is -0.000434237326053
Root 25 : 7.594844760625728 Change is -0.000534417268227
Root 26 : 7.619129768462294 Change is -0.000399790988995
Root 27 : 7.634003047894017 Change is -0.000375674709692
Root 28 : 7.706145954310674 Change is -0.000434508100434
Root 29 : 7.708661729940885 Change is -0.000361633960448
Root 30 : 7.734126464833066 Change is -0.000344264840331
Root 31 : 7.739582657492990 Change is -0.000257965051264
Root 32 : 7.745224255140214 Change is -0.000293420810676
Root 33 : 7.779004801440993 Change is -0.000531553186677
Root 34 : 7.786688071298219 Change is -0.000917322588674
Root 35 : 7.802520218875684 Change is -0.000481658355526
Root 36 : 7.820676470421570 Change is -0.000368447797440
Root 37 : 7.829444167174615 Change is -0.000348898787874
Root 38 : 7.854375136249981 Change is -0.000350078784852
Root 39 : 7.886136307992829 Change is -0.000464246595589
Root 40 : 7.935422019452139 Change is -0.000590950444019
Root 41 : 7.979821234376768 Change is -0.000512480516051
Root 42 : 7.989411779980476 Change is -0.000798058731402
Root 43 : 8.014567162310895 Change is -0.001036508848676
Root 44 : 8.041597617150146 Change is -0.000306791057809
Root 45 : 8.065398235626390 Change is -0.000665702351181
Root 46 : 8.077794677833001 Change is -0.000599697157034
Root 47 : 8.111340064398560 Change is -0.000318916728660
Root 48 : 8.121874590218821 Change is -0.000514268103516
Root 49 : 8.129288827408253 Change is -0.000425794258792
Root 50 : 8.150176536791141 Change is -0.000419440216118
Root 51 : 8.163839361505213 Change is -0.000932006697584
Root 52 : 8.178059643166232 Change is -0.000597102378821
Root 53 : 8.209786821176717 Change is -0.000507408475458
Root 54 : 8.223740572565697 Change is -0.000528369785152
Root 55 : 8.258188999707810 Change is -0.000464080976756
Root 56 : 8.270946699383188 Change is -0.000522909246489
Root 57 : 8.278856784726385 Change is -0.000464904174752
Root 58 : 8.315235430253741 Change is -0.000790655521368
Root 59 : 8.320385922146219 Change is -0.000487526786227
Root 60 : 8.348829608297443 Change is -0.000525236501151
Root 61 : 8.368197190909568 Change is -0.000403483267312
Root 62 : 8.377599427638108 Change is -0.000361253337936
Root 63 : 8.402620267471695 Change is -0.000409352178991
Root 64 : 8.407299623771275 Change is -0.000313751427412
Root 65 : 8.441318557214883 Change is -0.000570912052042
Root 66 : 8.444276405632488 Change is -0.000848922214937
Root 67 : 8.457932199682888 Change is -0.000554549931220
Root 68 : 8.469526334214178 Change is -0.000588251687565
Root 69 : 8.470437922485763 Change is -0.000477674542121
Root 70 : 8.488536087852133 Change is -0.001366134487921
Root 71 : 8.509187286499543 Change is -0.000371690167712
Root 72 : 8.519868394600721 Change is -0.000641496362094
Root 73 : 8.540909017857121 Change is -0.000759857020015
Root 74 : 8.553860000229964 Change is -0.000927512427662
Root 75 : 8.566158697959027 Change is -0.000900104712552
Root 76 : 8.567060710782275 Change is -0.000625812087711
Root 77 : 8.581350734040443 Change is -0.000404878174784
Root 78 : 8.607413027558673 Change is -0.000646859953555
Root 79 : 8.619779981244276 Change is -0.000653002767418
Root 80 : 8.626214232518221 Change is -0.000593685873974
Root 81 : 8.640807014699147 Change is -0.000711364729410
Root 82 : 8.662111605747819 Change is -0.000439958388601
Root 83 : 8.671336248606222 Change is -0.000447563556429
Root 84 : 8.701588314864907 Change is -0.000573161444852
Root 85 : 8.718398280862067 Change is -0.000574474366540
Root 86 : 8.726802696096728 Change is -0.000677249157020
Root 87 : 8.762225598719636 Change is -0.001065332900407
Root 88 : 8.770404402799416 Change is -0.000708226169363
Root 89 : 8.771232271526724 Change is -0.001319513375005
Root 90 : 8.784437750673032 Change is -0.002036304230715
Root 91 : 8.805190275193796 Change is -0.000872198518129
Root 92 : 8.815212995587496 Change is -0.001090871931401
Root 93 : 8.829831020855808 Change is -0.001093918697472
Root 94 : 8.837165461863613 Change is -0.000696948959065
Root 95 : 8.840859426164794 Change is -0.000846472911412
Root 96 : 8.859432481654558 Change is -0.000756428521945
Root 97 : 8.871883025553755 Change is -0.000771415936172
Root 98 : 8.889373891486576 Change is -0.000728087280052
Root 99 : 8.894009674228116 Change is -0.000737188900457
Root 100 : 8.894866505473399 Change is -0.000810405909749
Iteration 4 Dimension 998 NMult 800 NNew 198
CISAX will form 198 AO SS matrices at one time.
NMat= 198 NSing= 198 JSym2X= 0.
Root 1 has converged.
Root 2 has converged.
Root 3 has converged.
Root 4 has converged.
Root 5 has converged.
Root 6 has converged.
Root 7 has converged.
Root 8 has converged.
Root 9 has converged.
Root 10 has converged.
Root 11 has converged.
Root 12 has converged.
Root 13 has converged.
Root 14 has converged.
Root 15 has converged.
Root 16 has converged.
Root 17 has converged.
Root 18 has converged.
Root 19 has converged.
Root 20 has converged.
Root 21 has converged.
Root 22 has converged.
Root 23 has converged.
Root 24 has converged.
Root 25 has converged.
Root 26 has converged.
Root 27 has converged.
Root 28 has converged.
Root 29 has converged.
Root 30 has converged.
Root 31 has converged.
Root 32 has converged.
Root 33 has converged.
Root 34 has converged.
Root 35 has converged.
Root 36 has converged.
Root 37 has converged.
Root 38 has converged.
Root 39 has converged.
Root 40 has converged.
Root 41 has converged.
Root 42 has converged.
Root 43 has converged.
Root 44 has converged.
Root 45 has converged.
Root 46 has converged.
Root 47 has converged.
Root 48 has converged.
Root 49 has converged.
Root 50 has converged.
Root 51 has converged.
Root 52 has converged.
Root 53 has converged.
Root 54 has converged.
Root 55 has converged.
Root 56 has converged.
Root 57 has converged.
Root 58 not converged, maximum delta is 0.001663814707221
Root 59 not converged, maximum delta is 0.001428937251212
Root 60 has converged.
Root 61 has converged.
Root 62 has converged.
Root 63 has converged.
Root 64 has converged.
Root 65 not converged, maximum delta is 0.001784221090185
Root 66 not converged, maximum delta is 0.002581952811451
Root 67 has converged.
Root 68 has converged.
Root 69 has converged.
Root 70 has converged.
[truncated: 3,157 more rows]

## Sheet: 4-CONF_3_ecd
Entering Gaussian System, Link 0=g16
Input=CONF_3_ecd.com
Output=CONF_3_ecd.log
Initial command:
/public/apps/g16/l1.exe "scr.150.master/Gau-47967.inp" -scrdir="scr.150.master/"
Default is to use a total of 12 processors:
12 via shared-memory
1 via Linda
Entering Link 1 = /public/apps/g16/l1.exe PID= 47968.
Copyright (c) 1988-2019, Gaussian, Inc. All Rights Reserved.
This is part of the Gaussian(R) 16 program. It is based on
the Gaussian(R) 09 system (copyright 2009, Gaussian, Inc.),
the Gaussian(R) 03 system (copyright 2003, Gaussian, Inc.),
the Gaussian(R) 98 system (copyright 1998, Gaussian, Inc.),
the Gaussian(R) 94 system (copyright 1995, Gaussian, Inc.),
the Gaussian 92(TM) system (copyright 1992, Gaussian, Inc.),
the Gaussian 90(TM) system (copyright 1990, Gaussian, Inc.),
the Gaussian 88(TM) system (copyright 1988, Gaussian, Inc.),
the Gaussian 86(TM) system (copyright 1986, Carnegie Mellon
University), and the Gaussian 82(TM) system (copyright 1983,
Carnegie Mellon University). Gaussian is a federally registered
trademark of Gaussian, Inc.
This software contains proprietary and confidential information,
including trade secrets, belonging to Gaussian, Inc.
This software is provided under written license and may be
used, copied, transmitted, or stored only in accord with that
written license.
The following legend is applicable only to US Government
contracts under FAR:
RESTRICTED RIGHTS LEGEND
Use, reproduction and disclosure by the US Government is
subject to restrictions as set forth in subparagraphs (a)
and (c) of the Commercial Computer Software - Restricted
Rights clause in FAR 52.227-19.
Gaussian, Inc.
340 Quinnipiac St., Bldg. 40, Wallingford CT 06492
---------------------------------------------------------------
Warning -- This program may not be used in any manner that
competes with the business of Gaussian, Inc. or will provide
assistance to any competitor of Gaussian, Inc. The licensee
of this program is prohibited from giving any competitor of
Gaussian, Inc. access to this program. By using this program,
the user acknowledges that Gaussian, Inc. is engaged in the
business of creating and licensing software in the field of
computational chemistry and represents and warrants to the
licensee that it is not a competitor of Gaussian, Inc. and that
it will not use this program in any manner prohibited above.
---------------------------------------------------------------
Cite this work as:
Gaussian 16, Revision C.01,
M. J. Frisch, G. W. Trucks, H. B. Schlegel, G. E. Scuseria,
M. A. Robb, J. R. Cheeseman, G. Scalmani, V. Barone,
G. A. Petersson, H. Nakatsuji, X. Li, M. Caricato, A. V. Marenich,
J. Bloino, B. G. Janesko, R. Gomperts, B. Mennucci, H. P. Hratchian,
J. V. Ortiz, A. F. Izmaylov, J. L. Sonnenberg, D. Williams-Young,
F. Ding, F. Lipparini, F. Egidi, J. Goings, B. Peng, A. Petrone,
T. Henderson, D. Ranasinghe, V. G. Zakrzewski, J. Gao, N. Rega,
G. Zheng, W. Liang, M. Hada, M. Ehara, K. Toyota, R. Fukuda,
J. Hasegawa, M. Ishida, T. Nakajima, Y. Honda, O. Kitao, H. Nakai,
T. Vreven, K. Throssell, J. A. Montgomery, Jr., J. E. Peralta,
F. Ogliaro, M. J. Bearpark, J. J. Heyd, E. N. Brothers, K. N. Kudin,
V. N. Staroverov, T. A. Keith, R. Kobayashi, J. Normand,
K. Raghavachari, A. P. Rendell, J. C. Burant, S. S. Iyengar,
J. Tomasi, M. Cossi, J. M. Millam, M. Klene, C. Adamo, R. Cammi,
J. W. Ochterski, R. L. Martin, K. Morokuma, O. Farkas,
J. B. Foresman, and D. J. Fox, Gaussian, Inc., Wallingford CT, 2019.
******************************************
Gaussian 16: ES64L-G16RevC.01 3-Jul-2019
20-May-2020
******************************************
%oldchk=CONF_3_min.chk
%chk=CONF_3_ecd.chk
Copying data from "CONF_3_min.chk" to current chk file "CONF_3_ecd.chk"
IOpt= 2 FromEx=T IUOpen= 4 IOptOp= 5 NList= 0 IFRang= 0 IUIn= 4 IUOut= 2.
----------------------------------------------------------------------
#P td=(nstates=100) APFD/6-311+g(2d,p) guess=read geom=allcheck integr
al(ultrafinegrid) scrf=check
----------------------------------------------------------------------
1/29=7,38=1,40=1,172=1/1;
2/12=2,40=1/2;
3/5=4,6=6,7=112,11=9,14=-4,25=1,30=1,70=2,74=-44,75=-5,116=-2/1,2,3,8;
4/5=1/1;
5/5=2,38=6/2;
8/6=1,10=2,108=100/1;
9/41=100,42=1,70=2/14;
6/7=2,8=2,9=2,10=2/1;
99/5=1,9=1/99;
Leave Link 1 at Wed May 20 12:10:14 2020, MaxMem= 3221225472 cpu: 1.4 elap: 0.1
(Enter /public/apps/g16/l101.exe)
Structure from the checkpoint file: "CONF_3_ecd.chk"
-----
*****
-----
Charge = 0 Multiplicity = 1
Redundant internal coordinates found in file. (old form).
C,0,3.3237047855,0.0626381753,0.3566173772
C,0,2.8569053911,1.4329477756,-0.115716513
C,0,1.3533175551,1.6614244668,0.0226849464
C,0,0.6077726081,0.4692492357,-0.6138890868
C,0,1.0377882597,-0.9277436752,-0.1031585294
C,0,2.5530384077,-1.0559637195,-0.3324020531
C,0,-0.8907327183,0.6080204685,-0.5977106695
C,0,-1.7335524833,-0.4247267568,-0.6912599511
C,0,-1.2298516257,-1.8365409646,-0.8044191087
C,0,0.2853168955,-1.938349362,-0.9779090218
C,0,-3.2316840629,-0.2648209314,-0.5910968281
C,0,-3.7700290524,1.0658380468,-1.106375617
O,0,1.0842428703,1.7782688941,1.4282820745
C,0,0.9938480365,2.9752574763,-0.6728172739
O,0,3.0633524144,-2.3412105422,0.0294216318
C,0,-3.6572324622,-0.4968650918,0.8681068105
C,0,0.6956535608,-1.1971848004,1.3669535603
O,0,-3.1024032204,0.4596911386,1.7616927561
H,0,4.3908792197,-0.0605918392,0.1465274213
H,0,3.2035462726,-0.0250544336,1.4419480088
H,0,3.3803500334,2.2257893379,0.4283789556
H,0,3.1115351847,1.5560299227,-1.1741671488
H,0,0.9249096523,0.5062653173,-1.6679672576
H,0,2.7299417771,-0.9899862907,-1.4131882407
H,0,-1.2991014232,1.6126783471,-0.5419304376
H,0,-1.5535626763,-2.3963348977,0.0833750772
H,0,-1.7364064515,-2.3247565212,-1.6459376693
H,0,0.6199152743,-2.9525585375,-0.7422737992
H,0,0.5469975776,-1.753347978,-2.0267937249
H,0,-3.6933061875,-1.0753006209,-1.1701841944
H,0,-4.8630908926,1.0661430822,-1.0763583264
H,0,-3.4544897372,1.2451855808,-2.1371018192
H,0,-3.4249198353,1.9046689103,-0.4977698204
H,0,0.1276505144,1.8135528757,1.5448702326
H,0,-0.0451996551,3.2591708134,-0.4903766259
H,0,1.6314238525,3.7760498097,-0.2891170544
H,0,1.1434289834,2.9007420071,-1.752868613
H,0,3.0485735156,-2.4092432701,0.990725557
H,0,-4.7425239723,-0.4017684221,0.9539072806
H,0,-3.3807121978,-1.5106236587,1.1831295968
H,0,-0.3442116174,-0.9478892796,1.581541276
H,0,0.8244830941,-2.2607824574,1.5900882673
H,0,1.3144428161,-0.6196268896,2.0512006574
H,0,-2.1624082812,0.5328592585,1.5438378969
Recover connectivity data from disk.
ITRead= 0 0 0 0 0 0 0 0 0 0 0 0 0 0 0 0 0 0 0 0
ITRead= 0 0 0 0 0 0 0 0 0 0 0 0 0 0 0 0 0 0 0 0
ITRead= 0 0 0 0
MicOpt= -1 -1 -1 -1 -1 -1 -1 -1 -1 -1 -1 -1 -1 -1 -1 -1 -1 -1 -1 -1
MicOpt= -1 -1 -1 -1 -1 -1 -1 -1 -1 -1 -1 -1 -1 -1 -1 -1 -1 -1 -1 -1
MicOpt= -1 -1 -1 -1
----------------------------
! Current Parameters !
! (Angstroms and Degrees) !
-------------------------- --------------------------
! Name Definition Value !
--------------------------------------------------------------------------------
! R1 R(1,2) 1.5227 !
! R2 R(1,6) 1.5231 !
! R3 R(1,19) 1.0946 !
! R4 R(1,20) 1.0955 !
! R5 R(2,3) 1.5271 !
! R6 R(2,21) 1.0948 !
! R7 R(2,22) 1.0956 !
! R8 R(3,4) 1.5435 !
! R9 R(3,13) 1.4359 !
! R10 R(3,14) 1.5294 !
! R11 R(4,5) 1.5483 !
! R12 R(4,7) 1.505 !
! R13 R(4,23) 1.1014 !
! R14 R(5,6) 1.5378 !
! R15 R(5,10) 1.5339 !
! R16 R(5,17) 1.5333 !
! R17 R(6,15) 1.4294 !
! R18 R(6,24) 1.0972 !
! R19 R(7,8) 1.3363 !
! R20 R(7,25) 1.0859 !
! R21 R(8,9) 1.5032 !
! R22 R(8,11) 1.51 !
! R23 R(9,10) 1.5285 !
! R24 R(9,26) 1.0983 !
! R25 R(9,27) 1.0969 !
! R26 R(10,28) 1.0937 !
! R27 R(10,29) 1.0968 !
! R28 R(11,12) 1.5251 !
! R29 R(11,16) 1.5376 !
! R30 R(11,30) 1.0979 !
! R31 R(12,31) 1.0935 !
! R32 R(12,32) 1.0928 !
! R33 R(12,33) 1.0923 !
! R34 R(13,34) 0.9643 !
! R35 R(14,35) 1.0925 !
! R36 R(14,36) 1.0932 !
! R37 R(14,37) 1.0929 !
! R38 R(15,38) 0.9638 !
! R39 R(16,18) 1.4217 !
! R40 R(16,39) 1.0928 !
! R41 R(16,40) 1.097 !
! R42 R(17,41) 1.0906 !
! R43 R(17,42) 1.0944 !
! R44 R(17,43) 1.0884 !
! R45 R(18,44) 0.9677 !
! A1 A(2,1,6) 111.4361 !
! A2 A(2,1,19) 109.9159 !
! A3 A(2,1,20) 110.226 !
! A4 A(6,1,19) 108.8921 !
! A5 A(6,1,20) 109.5052 !
! A6 A(19,1,20) 106.7429 !
! A7 A(1,2,3) 114.1011 !
! A8 A(1,2,21) 110.5462 !
! A9 A(1,2,22) 109.2399 !
! A10 A(3,2,21) 108.503 !
! A11 A(3,2,22) 107.4324 !
! A12 A(21,2,22) 106.7174 !
! A13 A(2,3,4) 108.8229 !
! A14 A(2,3,13) 106.5825 !
! A15 A(2,3,14) 108.5858 !
! A16 A(4,3,13) 112.0901 !
! A17 A(4,3,14) 111.25 !
! A18 A(13,3,14) 109.3423 !
! A19 A(3,4,5) 115.2584 !
! A20 A(3,4,7) 113.9092 !
! A21 A(3,4,23) 103.2777 !
! A22 A(5,4,7) 110.8655 !
! A23 A(5,4,23) 105.4291 !
! A24 A(7,4,23) 107.0911 !
! A25 A(4,5,6) 107.4397 !
! A26 A(4,5,10) 105.6703 !
! A27 A(4,5,17) 114.3842 !
! A28 A(6,5,10) 110.0853 !
! A29 A(6,5,17) 110.3736 !
! A30 A(10,5,17) 108.757 !
! A31 A(1,6,5) 111.7078 !
! A32 A(1,6,15) 111.4196 !
! A33 A(1,6,24) 108.6553 !
! A34 A(5,6,15) 112.8923 !
! A35 A(5,6,24) 107.4996 !
! A36 A(15,6,24) 104.2326 !
! A37 A(4,7,8) 123.7782 !
! A38 A(4,7,25) 117.4061 !
! A39 A(8,7,25) 118.7785 !
! A40 A(7,8,9) 121.3171 !
! A41 A(7,8,11) 122.635 !
! A42 A(9,8,11) 115.9064 !
! A43 A(8,9,10) 113.7823 !
! A44 A(8,9,26) 108.6069 !
! A45 A(8,9,27) 108.7257 !
! A46 A(10,9,26) 110.4852 !
! A47 A(10,9,27) 109.9424 !
! A48 A(26,9,27) 104.9022 !
! A49 A(5,10,9) 112.1906 !
! A50 A(5,10,28) 109.7574 !
! A51 A(5,10,29) 108.4947 !
! A52 A(9,10,28) 109.9132 !
! A53 A(9,10,29) 109.5019 !
! A54 A(28,10,29) 106.8269 !
! A55 A(8,11,12) 114.8475 !
! A56 A(8,11,16) 108.7575 !
! A57 A(8,11,30) 107.6985 !
! A58 A(12,11,16) 110.7698 !
! A59 A(12,11,30) 108.5101 !
! A60 A(16,11,30) 105.8305 !
! A61 A(11,12,31) 110.1099 !
! A62 A(11,12,32) 111.0973 !
! A63 A(11,12,33) 111.7314 !
! A64 A(31,12,32) 108.3302 !
! A65 A(31,12,33) 107.4766 !
! A66 A(32,12,33) 107.9554 !
! A67 A(3,13,34) 107.8919 !
! A68 A(3,14,35) 111.768 !
! A69 A(3,14,36) 109.4261 !
! A70 A(3,14,37) 111.0182 !
! A71 A(35,14,36) 107.8018 !
! A72 A(35,14,37) 108.2355 !
! A73 A(36,14,37) 108.4812 !
! A74 A(6,15,38) 108.087 !
! A75 A(11,16,18) 112.7637 !
! A76 A(11,16,39) 109.6474 !
! A77 A(11,16,40) 110.0125 !
! A78 A(18,16,39) 106.2402 !
! A79 A(18,16,40) 110.0534 !
! A80 A(39,16,40) 107.9509 !
! A81 A(5,17,41) 111.1759 !
! A82 A(5,17,42) 109.8781 !
! A83 A(5,17,43) 112.4984 !
! A84 A(41,17,42) 107.1139 !
! A85 A(41,17,43) 107.2815 !
! A86 A(42,17,43) 108.7 !
! A87 A(16,18,44) 106.7656 !
! D1 D(6,1,2,3) 54.2409 !
! D2 D(6,1,2,21) 176.8527 !
! D3 D(6,1,2,22) -66.0065 !
! D4 D(19,1,2,3) 175.0532 !
! D5 D(19,1,2,21) -62.3349 !
! D6 D(19,1,2,22) 54.8058 !
! D7 D(20,1,2,3) -67.5578 !
! D8 D(20,1,2,21) 55.054 !
! D9 D(20,1,2,22) 172.1947 !
! D10 D(2,1,6,5) -57.394 !
! D11 D(2,1,6,15) 175.3103 !
! D12 D(2,1,6,24) 61.0308 !
! D13 D(19,1,6,5) -178.8038 !
! D14 D(19,1,6,15) 53.9004 !
! D15 D(19,1,6,24) -60.3791 !
! D16 D(20,1,6,5) 64.8215 !
! D17 D(20,1,6,15) -62.4742 !
! D18 D(20,1,6,24) -176.7537 !
! D19 D(1,2,3,4) -50.393 !
! D20 D(1,2,3,13) 70.6753 !
! D21 D(1,2,3,14) -171.6319 !
! D22 D(21,2,3,4) -174.1135 !
! D23 D(21,2,3,13) -53.0452 !
! D24 D(21,2,3,14) 64.6476 !
! D25 D(22,2,3,4) 70.8613 !
! D26 D(22,2,3,13) -168.0704 !
! D27 D(22,2,3,14) -50.3776 !
! D28 D(2,3,4,5) 52.9126 !
! D29 D(2,3,4,7) -177.2982 !
! D30 D(2,3,4,23) -61.5177 !
! D31 D(13,3,4,5) -64.717 !
! D32 D(13,3,4,7) 65.0721 !
! D33 D(13,3,4,23) -179.1473 !
! D34 D(14,3,4,5) 172.507 !
! D35 D(14,3,4,7) -57.7039 !
! D36 D(14,3,4,23) 58.0766 !
! D37 D(2,3,13,34) -173.097 !
! D38 D(4,3,13,34) -54.1388 !
! D39 D(14,3,13,34) 69.7109 !
! D40 D(2,3,14,35) -172.2625 !
! D41 D(2,3,14,36) -52.9285 !
! D42 D(2,3,14,37) 66.7803 !
! D43 D(4,3,14,35) 68.0022 !
! D44 D(4,3,14,36) -172.6638 !
! D45 D(4,3,14,37) -52.955 !
! D46 D(13,3,14,35) -56.3406 !
! D47 D(13,3,14,36) 62.9934 !
! D48 D(13,3,14,37) -177.2978 !
! D49 D(3,4,5,6) -56.3636 !
! D50 D(3,4,5,10) -173.879 !
! D51 D(3,4,5,17) 66.5279 !
! D52 D(7,4,5,6) 172.3803 !
! D53 D(7,4,5,10) 54.8649 !
! D54 D(7,4,5,17) -64.7283 !
! D55 D(23,4,5,6) 56.8188 !
! D56 D(23,4,5,10) -60.6966 !
! D57 D(23,4,5,17) 179.7103 !
! D58 D(3,4,7,8) -158.1204 !
! D59 D(3,4,7,25) 24.1275 !
! D60 D(5,4,7,8) -26.1691 !
! D61 D(5,4,7,25) 156.0788 !
! D62 D(23,4,7,8) 88.3547 !
! D63 D(23,4,7,25) -89.3974 !
! D64 D(4,5,6,1) 56.9246 !
! D65 D(4,5,6,15) -176.5785 !
! D66 D(4,5,6,24) -62.1873 !
! D67 D(10,5,6,1) 171.5269 !
! D68 D(10,5,6,15) -61.9762 !
! D69 D(10,5,6,24) 52.415 !
! D70 D(17,5,6,1) -68.4056 !
! D71 D(17,5,6,15) 58.0913 !
! D72 D(17,5,6,24) 172.4825 !
! D73 D(4,5,10,9) -63.3426 !
! D74 D(4,5,10,28) 174.1533 !
! D75 D(4,5,10,29) 57.763 !
! D76 D(6,5,10,9) -179.0646 !
! D77 D(6,5,10,28) 58.4313 !
! D78 D(6,5,10,29) -57.959 !
! D79 D(17,5,10,9) 59.8945 !
! D80 D(17,5,10,28) -62.6096 !
! D81 D(17,5,10,29) -178.9999 !
! D82 D(4,5,17,41) 49.1718 !
! D83 D(4,5,17,42) 167.573 !
! D84 D(4,5,17,43) -71.1777 !
! D85 D(6,5,17,41) 170.4605 !
! D86 D(6,5,17,42) -71.1383 !
! D87 D(6,5,17,43) 50.1111 !
! D88 D(10,5,17,41) -68.6758 !
! D89 D(10,5,17,42) 49.7254 !
! D90 D(10,5,17,43) 170.9748 !
! D91 D(1,6,15,38) 55.2058 !
! D92 D(5,6,15,38) -71.4446 !
! D93 D(24,6,15,38) 172.2057 !
! D94 D(4,7,8,9) 0.819 !
! D95 D(4,7,8,11) 176.3169 !
! D96 D(25,7,8,9) 178.5421 !
! D97 D(25,7,8,11) -5.96 !
! D98 D(7,8,9,10) -7.3057 !
! D99 D(7,8,9,26) 116.1917 !
! D100 D(7,8,9,27) -130.1898 !
! D101 D(11,8,9,10) 176.9087 !
! D102 D(11,8,9,26) -59.594 !
! D103 D(11,8,9,27) 54.0246 !
! D104 D(7,8,11,12) 31.0565 !
! D105 D(7,8,11,16) -93.6915 !
! D106 D(7,8,11,30) 152.0548 !
! D107 D(9,8,11,12) -153.2189 !
! D108 D(9,8,11,16) 82.0331 !
! D109 D(9,8,11,30) -32.2206 !
! D110 D(8,9,10,5) 39.9394 !
! D111 D(8,9,10,28) 162.3551 !
! D112 D(8,9,10,29) -80.5849 !
! D113 D(26,9,10,5) -82.5305 !
! D114 D(26,9,10,28) 39.8853 !
! D115 D(26,9,10,29) 156.9453 !
! D116 D(27,9,10,5) 162.1547 !
! D117 D(27,9,10,28) -75.4296 !
! D118 D(27,9,10,29) 41.6304 !
! D119 D(8,11,12,31) 175.235 !
! D120 D(8,11,12,32) 55.2195 !
! D121 D(8,11,12,33) -65.4099 !
! D122 D(16,11,12,31) -61.0803 !
! D123 D(16,11,12,32) 178.9041 !
! D124 D(16,11,12,33) 58.2748 !
! D125 D(30,11,12,31) 54.6823 !
! D126 D(30,11,12,32) -65.3332 !
! D127 D(30,11,12,33) 174.0374 !
! D128 D(8,11,16,18) 62.8324 !
! D129 D(8,11,16,39) -179.0134 !
! D130 D(8,11,16,40) -60.4378 !
! D131 D(12,11,16,18) -64.2825 !
! D132 D(12,11,16,39) 53.8717 !
! D133 D(12,11,16,40) 172.4472 !
! D134 D(30,11,16,18) 178.3005 !
! D135 D(30,11,16,39) -63.5452 !
! D136 D(30,11,16,40) 55.0303 !
! D137 D(11,16,18,44) -46.6998 !
! D138 D(39,16,18,44) -166.8333 !
! D139 D(40,16,18,44) 76.5476 !
--------------------------------------------------------------------------------
NAtoms= 44 NQM= 44 NQMF= 0 NMMI= 0 NMMIF= 0
NMic= 0 NMicF= 0.
Isotopes and Nuclear Properties:
(Nuclear quadrupole moments (NQMom) in fm**2, nuclear magnetic moments (NMagM)
in nuclear magnetons)
Atom 1 2 3 4 5 6 7 8 9 10
IAtWgt= 12 12 12 12 12 12 12 12 12 12
AtmWgt= 12.0000000 12.0000000 12.0000000 12.0000000 12.0000000 12.0000000 12.0000000 12.0000000 12.0000000 12.0000000
NucSpn= 0 0 0 0 0 0 0 0 0 0
AtZEff= 3.6000000 3.6000000 3.6000000 3.6000000 3.6000000 3.6000000 3.6000000 3.6000000 3.6000000 3.6000000
NQMom= 0.0000000 0.0000000 0.0000000 0.0000000 0.0000000 0.0000000 0.0000000 0.0000000 0.0000000 0.0000000
NMagM= 0.0000000 0.0000000 0.0000000 0.0000000 0.0000000 0.0000000 0.0000000 0.0000000 0.0000000 0.0000000
AtZNuc= 6.0000000 6.0000000 6.0000000 6.0000000 6.0000000 6.0000000 6.0000000 6.0000000 6.0000000 6.0000000
Atom 11 12 13 14 15 16 17 18 19 20
IAtWgt= 12 12 16 12 16 12 12 16 1 1
AtmWgt= 12.0000000 12.0000000 15.9949146 12.0000000 15.9949146 12.0000000 12.0000000 15.9949146 1.0078250 1.0078250
NucSpn= 0 0 0 0 0 0 0 0 1 1
AtZEff= 3.6000000 3.6000000 5.6000000 3.6000000 5.6000000 3.6000000 3.6000000 5.6000000 1.0000000 1.0000000
NQMom= 0.0000000 0.0000000 0.0000000 0.0000000 0.0000000 0.0000000 0.0000000 0.0000000 0.0000000 0.0000000
NMagM= 0.0000000 0.0000000 0.0000000 0.0000000 0.0000000 0.0000000 0.0000000 0.0000000 2.7928460 2.7928460
AtZNuc= 6.0000000 6.0000000 8.0000000 6.0000000 8.0000000 6.0000000 6.0000000 8.0000000 1.0000000 1.0000000
Atom 21 22 23 24 25 26 27 28 29 30
IAtWgt= 1 1 1 1 1 1 1 1 1 1
AtmWgt= 1.0078250 1.0078250 1.0078250 1.0078250 1.0078250 1.0078250 1.0078250 1.0078250 1.0078250 1.0078250
NucSpn= 1 1 1 1 1 1 1 1 1 1
AtZEff= 1.0000000 1.0000000 1.0000000 1.0000000 1.0000000 1.0000000 1.0000000 1.0000000 1.0000000 1.0000000
NQMom= 0.0000000 0.0000000 0.0000000 0.0000000 0.0000000 0.0000000 0.0000000 0.0000000 0.0000000 0.0000000
NMagM= 2.7928460 2.7928460 2.7928460 2.7928460 2.7928460 2.7928460 2.7928460 2.7928460 2.7928460 2.7928460
AtZNuc= 1.0000000 1.0000000 1.0000000 1.0000000 1.0000000 1.0000000 1.0000000 1.0000000 1.0000000 1.0000000
Atom 31 32 33 34 35 36 37 38 39 40
IAtWgt= 1 1 1 1 1 1 1 1 1 1
AtmWgt= 1.0078250 1.0078250 1.0078250 1.0078250 1.0078250 1.0078250 1.0078250 1.0078250 1.0078250 1.0078250
NucSpn= 1 1 1 1 1 1 1 1 1 1
AtZEff= 1.0000000 1.0000000 1.0000000 1.0000000 1.0000000 1.0000000 1.0000000 1.0000000 1.0000000 1.0000000
NQMom= 0.0000000 0.0000000 0.0000000 0.0000000 0.0000000 0.0000000 0.0000000 0.0000000 0.0000000 0.0000000
NMagM= 2.7928460 2.7928460 2.7928460 2.7928460 2.7928460 2.7928460 2.7928460 2.7928460 2.7928460 2.7928460
AtZNuc= 1.0000000 1.0000000 1.0000000 1.0000000 1.0000000 1.0000000 1.0000000 1.0000000 1.0000000 1.0000000
Atom 41 42 43 44
IAtWgt= 1 1 1 1
AtmWgt= 1.0078250 1.0078250 1.0078250 1.0078250
NucSpn= 1 1 1 1
AtZEff= 1.0000000 1.0000000 1.0000000 1.0000000
NQMom= 0.0000000 0.0000000 0.0000000 0.0000000
NMagM= 2.7928460 2.7928460 2.7928460 2.7928460
AtZNuc= 1.0000000 1.0000000 1.0000000 1.0000000
Leave Link 101 at Wed May 20 12:10:14 2020, MaxMem= 3221225472 cpu: 4.5 elap: 0.4
(Enter /public/apps/g16/l202.exe)
Input orientation:
---------------------------------------------------------------------
Center Atomic Atomic Coordinates (Angstroms)
Number Number Type X Y Z
---------------------------------------------------------------------
1 6 0 3.323705 0.062638 0.356617
2 6 0 2.856905 1.432948 -0.115717
3 6 0 1.353318 1.661424 0.022685
4 6 0 0.607773 0.469249 -0.613889
5 6 0 1.037788 -0.927744 -0.103159
6 6 0 2.553038 -1.055964 -0.332402
7 6 0 -0.890733 0.608020 -0.597711
8 6 0 -1.733552 -0.424727 -0.691260
9 6 0 -1.229852 -1.836541 -0.804419
10 6 0 0.285317 -1.938349 -0.977909
11 6 0 -3.231684 -0.264821 -0.591097
12 6 0 -3.770029 1.065838 -1.106376
13 8 0 1.084243 1.778269 1.428282
14 6 0 0.993848 2.975257 -0.672817
15 8 0 3.063352 -2.341211 0.029422
16 6 0 -3.657232 -0.496865 0.868107
17 6 0 0.695654 -1.197185 1.366954
18 8 0 -3.102403 0.459691 1.761693
19 1 0 4.390879 -0.060592 0.146527
20 1 0 3.203546 -0.025054 1.441948
21 1 0 3.380350 2.225789 0.428379
22 1 0 3.111535 1.556030 -1.174167
23 1 0 0.924910 0.506265 -1.667967
24 1 0 2.729942 -0.989986 -1.413188
25 1 0 -1.299101 1.612678 -0.541930
26 1 0 -1.553563 -2.396335 0.083375
27 1 0 -1.736406 -2.324757 -1.645938
28 1 0 0.619915 -2.952559 -0.742274
29 1 0 0.546998 -1.753348 -2.026794
30 1 0 -3.693306 -1.075301 -1.170184
31 1 0 -4.863091 1.066143 -1.076358
32 1 0 -3.454490 1.245186 -2.137102
33 1 0 -3.424920 1.904669 -0.497770
34 1 0 0.127651 1.813553 1.544870
35 1 0 -0.045200 3.259171 -0.490377
36 1 0 1.631424 3.776050 -0.289117
37 1 0 1.143429 2.900742 -1.752869
38 1 0 3.048574 -2.409243 0.990726
39 1 0 -4.742524 -0.401768 0.953907
40 1 0 -3.380712 -1.510624 1.183130
41 1 0 -0.344212 -0.947889 1.581541
42 1 0 0.824483 -2.260782 1.590088
43 1 0 1.314443 -0.619627 2.051201
44 1 0 -2.162408 0.532859 1.543838
---------------------------------------------------------------------
Distance matrix (angstroms):
1 2 3 4 5
1 C 0.000000
2 C 1.522744 0.000000
3 C 2.559307 1.527132 0.000000
4 C 2.912645 2.497096 1.543485 0.000000
5 C 2.533311 2.980304 2.611357 1.548337 0.000000
6 C 1.523136 2.516738 2.991591 2.487884 1.537848
7 C 4.355418 3.867508 2.555448 1.505004 2.514428
8 C 5.187622 4.985430 3.793483 2.507386 2.877363
9 C 5.068507 5.278774 4.426356 2.954629 2.541627
10 C 3.875140 4.326903 3.885896 2.456221 1.533860
11 C 6.631630 6.338716 5.010927 3.909067 4.348097
12 C 7.312169 6.710621 5.279979 4.445628 5.300558
13 O 3.017788 2.376028 1.435882 2.472048 3.109658
14 C 3.869279 2.481947 1.529411 2.536258 3.944599
15 O 2.439944 3.782586 4.352626 3.787137 2.473535
16 C 7.021976 6.864844 5.520739 4.617354 4.813754
17 C 3.084572 3.713074 3.226643 2.590070 1.533259
18 O 6.589898 6.323389 4.931710 4.405552 4.748034
19 H 1.094616 2.156967 3.493917 3.894979 3.472393
20 H 1.095477 2.161539 2.877823 3.347961 2.809397
21 H 2.165082 1.094820 2.142885 3.443681 3.964202
22 H 2.149078 1.095584 2.129529 2.786365 3.408316
23 H 3.170168 2.645908 2.091944 1.101375 2.125500
24 H 2.143078 2.751393 3.314635 2.696637 2.140896
25 H 4.957857 4.181669 2.712286 2.224585 3.479557
26 H 5.468907 5.844251 4.991898 3.656381 2.984402
27 H 5.942609 6.128657 5.312282 3.790352 3.468136
28 H 4.196362 4.962798 4.734119 3.424237 2.164015
29 H 4.085163 4.374971 4.063396 2.634375 2.150086
30 H 7.270796 7.092847 5.863532 4.603735 4.852172
31 H 8.371623 7.788178 6.340819 5.522726 6.304211
32 H 7.318536 6.629854 5.287054 4.407293 5.388795
33 H 7.047481 6.311087 4.812649 4.282116 5.300381
34 H 3.833068 3.217334 1.960217 2.588032 3.325516
35 H 4.720671 3.449301 2.184462 2.867977 4.342010
36 H 4.131612 2.649906 2.155505 3.476819 4.744750
37 H 4.154319 2.787595 2.175443 2.737948 4.170133
38 H 2.566708 4.002922 4.514569 4.100977 2.726661
39 H 8.101634 7.890602 6.502555 5.642901 5.899665
40 H 6.935956 7.018510 5.815459 4.801790 4.638689
41 H 3.996901 4.335461 3.481402 2.781092 2.179115
42 H 3.628477 4.547983 4.256774 3.515331 2.165543
43 H 2.715554 3.359730 3.052799 2.964412 2.193795
44 H 5.632765 5.362629 3.993481 3.511942 3.884227
6 7 8 9 10
6 C 0.000000
7 C 3.833900 0.000000
8 C 4.347655 1.336287 0.000000
9 C 3.891318 2.476613 1.503243 0.000000
10 C 2.517508 2.830485 2.539499 1.528463 0.000000
11 C 5.844300 2.498389 1.509967 2.554045 3.914028
12 C 6.714332 2.959507 2.557605 3.868783 5.048512
13 O 3.645579 3.061806 4.157598 4.838061 4.499032
14 C 4.335632 3.026730 4.358778 5.302411 4.973794
15 O 1.429404 4.972529 5.215610 4.402452 2.982364
16 C 6.349904 3.320077 2.477372 3.237939 4.585777
17 C 2.521434 3.104077 3.276275 2.971734 2.493207
18 O 6.218236 3.237325 2.944983 3.919702 4.973195
19 H 2.144248 5.375533 6.192184 5.970838 4.652523
20 H 2.152731 4.617804 5.393075 5.289864 4.246465
21 H 3.468881 4.681045 5.867779 6.267079 5.375586
22 H 2.800535 4.153212 5.256565 5.522127 4.498523
23 H 2.622041 2.110062 2.981296 3.298098 2.619427
24 H 1.097154 4.040781 4.556696 4.094779 2.658016
25 H 4.690899 1.085916 2.088556 3.459886 3.912832
26 H 4.339774 3.151091 2.125957 1.098334 2.171993
27 H 4.662033 3.227247 2.126389 1.096862 2.164010
28 H 2.738984 3.870488 3.454178 2.161248 1.093664
29 H 2.716893 3.112139 2.958005 2.158313 1.096750
30 H 6.302307 3.318993 2.119729 2.604204 4.075692
31 H 7.749567 4.027233 3.487837 4.658321 5.961776
32 H 6.681514 3.057541 2.800123 4.027666 5.046264
33 H 6.672981 2.848401 2.885177 4.348449 5.363318
34 H 4.200093 2.661027 3.670729 4.548094 4.523941
35 H 5.039463 2.784788 4.057338 5.241021 5.230788
36 H 4.919309 4.061147 5.397343 6.320887 5.911074
37 H 4.433987 3.275481 4.523580 5.382738 4.975311
38 H 1.956422 5.210100 5.443906 4.674982 3.425325
39 H 7.436921 4.273580 3.429433 4.182003 5.601087
40 H 6.141087 3.722908 2.721331 2.946655 4.277009
41 H 3.474035 2.732888 2.714699 2.695713 2.815689
42 H 2.852273 3.994804 3.888341 3.183385 2.643723
43 H 2.721410 3.658777 4.104796 4.013587 3.460294
44 H 5.317901 2.491794 2.469119 3.463817 4.296212
11 12 13 14 15
11 C 0.000000
12 C 1.525117 0.000000
13 O 5.184528 5.522319 0.000000
14 C 5.325402 5.150571 2.419829 0.000000
15 O 6.657621 7.719658 4.779518 5.748114 0.000000
16 C 1.537599 2.520584 5.288820 6.005217 7.019349
17 C 4.486340 5.583991 3.001348 4.653908 2.950218
18 O 2.465208 3.006485 4.402024 5.388338 6.990161
19 H 7.660892 8.333009 3.994765 4.628988 2.641451
20 H 6.752996 7.504316 2.782734 4.284492 2.716517
21 H 7.138730 7.404653 2.544050 2.733080 4.595339
22 H 6.625096 6.899334 3.306365 2.598107 4.079146
23 H 4.362510 4.761403 3.351140 2.662893 3.944894
24 H 6.061574 6.824234 4.294824 4.391506 2.004518
25 H 2.694865 2.592897 3.096690 2.670463 5.915292
26 H 2.795417 4.279588 5.118018 5.992924 4.617559
27 H 2.755336 3.990348 5.851641 6.040811 5.083777
28 H 4.699107 5.962524 5.225671 5.940004 2.634321
29 H 4.307595 5.237528 4.969758 4.938890 3.302370
30 H 1.097868 2.143463 6.141650 6.214806 6.978110
31 H 2.160655 1.093474 6.492390 6.173435 8.698351
32 H 2.172532 1.092761 5.796226 4.992493 7.748440
33 H 2.180077 1.092309 4.904916 4.549979 7.771943
34 H 4.490782 4.772849 0.964317 2.649150 5.308200
35 H 4.752089 4.366293 2.673941 1.092480 6.426318
36 H 6.330059 6.098266 2.690724 1.093159 6.290688
37 H 5.523777 5.284590 3.373895 1.092903 5.860097
38 H 6.822195 7.935198 4.645999 5.998510 0.963822
39 H 2.165278 2.710052 6.239295 6.852481 8.096161
40 H 2.173042 3.468653 5.550922 6.534864 6.599006
41 H 3.677558 4.797522 3.081543 4.718434 3.995236
42 H 5.019355 6.280674 4.050629 5.706622 2.730327
43 H 5.270189 6.217953 2.488157 4.521753 3.179642
44 H 2.517457 3.145178 3.479244 4.565175 6.153236
16 17 18 19 20
16 C 0.000000
17 C 4.436994 0.000000
18 O 1.421735 4.162486 0.000000
19 H 8.092164 4.054131 7.683016 0.000000
20 H 6.900883 2.769303 6.332631 1.757594 0.000000
21 H 7.558689 4.450311 6.850031 2.515581 2.474849
22 H 7.362165 4.458023 6.959473 2.448351 3.058162
23 H 5.332351 3.487842 5.289989 3.953057 3.891794
24 H 6.800255 3.451152 6.796888 2.460732 3.050770
25 H 3.463980 3.939317 3.144512 5.970736 5.185728
26 H 2.940955 2.853859 3.656849 6.387180 5.486235
27 H 3.653927 4.032846 4.607715 6.773699 6.263130
28 H 5.188232 2.745162 5.636395 4.834626 4.473953
29 H 5.256876 3.442228 5.706864 4.729078 4.698555
30 H 2.119085 5.070985 3.361736 8.253328 7.449351
31 H 2.770927 6.480129 3.394457 9.402178 8.520752
32 H 3.479529 5.955440 3.992689 8.274650 7.665021
33 H 2.772536 5.484324 2.701324 8.084806 7.170976
34 H 4.485686 3.069010 3.509017 4.862397 3.584997
35 H 5.385171 4.884429 4.717563 5.577210 5.007431
36 H 6.896873 5.324594 6.132958 4.745967 4.462796
37 H 6.438913 5.169797 6.028098 4.787811 4.797001
38 H 6.974243 2.673362 6.830790 2.833835 2.431455
39 H 1.092823 5.511540 2.021046 9.175365 7.969952
40 H 1.097000 4.092529 2.072277 7.973379 6.754729
41 H 3.418848 1.090649 3.101831 5.026693 3.668473
42 H 4.870158 1.094361 4.780257 4.432143 3.268083
43 H 5.111980 1.088424 4.556015 3.661251 2.072056
44 H 1.936864 3.345573 0.967680 6.726830 5.395843
21 22 23 24 25
21 H 0.000000
22 H 1.757553 0.000000
23 H 3.657953 2.475313 0.000000
24 H 3.762395 2.585526 2.358352 0.000000
25 H 4.818161 4.456080 2.727331 4.875053 0.000000
26 H 6.769531 6.242254 4.199418 4.750361 4.065458
27 H 7.154820 6.227809 3.885585 4.667339 4.112598
28 H 5.983788 5.169340 3.593521 2.958721 4.956223
29 H 5.467110 4.272682 2.318928 2.392588 4.116192
30 H 7.968012 7.295874 4.906838 6.428409 3.654059
31 H 8.459511 7.990258 5.845033 7.873707 3.645043
32 H 7.366024 6.643535 4.466008 6.615681 2.706533
33 H 6.875505 6.580601 4.716557 6.862896 2.146232
34 H 3.463603 4.045127 3.559066 4.835479 2.535884
35 H 3.694101 3.651470 3.147431 5.158326 2.070233
36 H 2.444760 2.811144 3.618270 5.018504 3.651311
37 H 3.196438 2.452873 2.405926 4.215468 3.015200
38 H 4.680794 4.518198 4.480936 2.809736 6.117775
39 H 8.553439 8.369464 6.310195 7.860463 4.260597
40 H 7.761597 7.557148 5.543913 6.659731 4.130854
41 H 5.027363 5.079934 3.779489 4.291922 3.460846
42 H 5.292575 5.238299 4.275695 3.776952 4.904978
43 H 3.872714 4.285560 3.905327 3.760691 4.305593
44 H 5.901901 6.020707 4.455102 5.915924 2.502346
26 27 28 29 30
26 H 0.000000
27 H 1.740425 0.000000
28 H 2.390625 2.600576 0.000000
29 H 3.046079 2.384427 1.758811 0.000000
30 H 2.809812 2.370008 4.723461 4.378779 0.000000
31 H 4.928155 4.647448 6.806242 6.174295 2.441922
32 H 4.669552 3.992185 6.013932 5.001527 2.525197
33 H 4.726345 4.696531 6.325593 5.612052 3.066658
34 H 4.762940 5.548114 5.309347 5.065118 5.506061
35 H 5.881249 5.947751 6.252312 5.276042 5.706002
36 H 6.955661 7.099513 6.819287 5.896587 7.257040
37 H 6.221300 5.967472 5.962927 4.700140 6.288278
38 H 4.690747 5.463988 3.032632 3.974104 7.204296
39 H 3.860777 4.415181 6.175704 6.220159 2.462980
40 H 2.309203 3.371969 4.668123 5.078329 2.413567
41 H 2.409362 3.774995 3.216886 3.803038 4.336434
42 H 2.818450 4.127240 2.441376 3.662830 5.425393
43 H 3.905699 5.087630 3.705191 4.301666 5.971810
44 H 3.329238 4.303733 5.011563 5.031604 3.506529
31 32 33 34 35
31 H 0.000000
32 H 1.772397 0.000000
33 H 1.762449 1.767258 0.000000
34 H 5.686560 5.168335 4.098956 0.000000
35 H 5.325863 4.288484 3.641049 2.502383 0.000000
36 H 7.081106 5.973846 5.395574 3.078350 1.765994
37 H 6.316779 4.901975 4.841203 3.617854 1.770648
38 H 8.885133 8.088757 7.920327 5.164385 6.625407
39 H 2.508242 3.731732 3.027061 5.382888 6.128074
40 H 3.733960 4.315538 3.806783 4.846609 6.056171
41 H 5.616140 5.320875 4.685231 2.801707 4.699107
42 H 7.108225 6.670335 6.306153 4.133743 5.962765
43 H 7.126385 6.615294 5.943978 2.754126 4.832527
44 H 3.800461 3.965627 2.764771 2.623842 4.006666
36 37 38 39 40
36 H 0.000000
37 H 1.773942 0.000000
38 H 6.473342 6.273183 0.000000
39 H 7.721819 7.271702 8.045652 0.000000
40 H 7.432223 6.967646 6.494632 1.771055 0.000000
41 H 5.451431 5.305028 3.741071 4.476307 3.113798
42 H 6.373846 6.157794 2.308215 5.903577 4.290923
43 H 4.989944 5.185864 2.708236 6.159412 4.857150
44 H 5.317064 5.234855 6.009678 2.806874 2.406283
41 42 43 44
41 H 0.000000
42 H 1.757728 0.000000
43 H 1.754842 1.773718 0.000000
44 H 2.345182 4.089999 3.697855 0.000000
Stoichiometry C15H26O3
Framework group C1[X(C15H26O3)]
Deg. of freedom 126
Full point group C1 NOp 1
RotChk: IX=0 Diff= 8.63D-16
Largest Abelian subgroup C1 NOp 1
Largest concise Abelian subgroup C1 NOp 1
Standard orientation:
---------------------------------------------------------------------
Center Atomic Atomic Coordinates (Angstroms)
Number Number Type X Y Z
---------------------------------------------------------------------
1 6 0 3.328392 0.137177 0.306631
2 6 0 2.819252 1.480786 -0.197592
3 6 0 1.312864 1.675883 -0.039904
4 6 0 0.587293 0.447120 -0.628149
5 6 0 1.060980 -0.922922 -0.084130
6 6 0 2.574977 -1.020255 -0.335755
7 6 0 -0.913772 0.549061 -0.590065
8 6 0 -1.731596 -0.506624 -0.638599
9 6 0 -1.194241 -1.908241 -0.718949
10 6 0 0.319931 -1.977523 -0.915627
11 6 0 -3.231428 -0.381051 -0.517207
12 6 0 -3.811790 0.919881 -1.061943
13 8 0 1.064290 1.827854 1.366109
14 6 0 0.908731 2.959071 -0.767368
15 8 0 3.123622 -2.281079 0.054768
16 6 0 -3.626677 -0.579992 0.955346
17 6 0 0.750235 -1.156836 1.398977
18 8 0 -3.081498 0.416255 1.810684
19 1 0 4.394711 0.034276 0.081773
20 1 0 3.228530 0.078917 1.395990
21 1 0 3.331406 2.302246 0.313813
22 1 0 3.053074 1.578549 -1.263459
23 1 0 0.885847 0.460564 -1.688202
24 1 0 2.732184 -0.982149 -1.420919
25 1 0 -1.346477 1.544486 -0.556752
26 1 0 -1.488883 -2.449189 0.190391
27 1 0 -1.702167 -2.433750 -1.536847
28 1 0 0.683980 -2.975638 -0.656135
29 1 0 0.559391 -1.817427 -1.973876
30 1 0 -3.681922 -1.219643 -1.064138
31 1 0 -4.903859 0.893940 -1.012993
32 1 0 -3.518051 1.076206 -2.102812
33 1 0 -3.477984 1.784790 -0.484323
34 1 0 0.109178 1.842835 1.498185
35 1 0 -0.134004 3.222409 -0.575352
36 1 0 1.532099 3.786528 -0.418477
37 1 0 1.042199 2.856133 -1.847195
38 1 0 3.126533 -2.320774 1.017767
39 1 0 -4.712455 -0.509357 1.057127
40 1 0 -3.319372 -1.576732 1.295174
41 1 0 -0.291905 -0.927151 1.624152
42 1 0 0.909653 -2.209783 1.650996
43 1 0 1.365470 -0.543953 2.055124
44 1 0 -2.147404 0.506214 1.574502
---------------------------------------------------------------------
Rotational constants (GHZ): 0.6555107 0.3134448 0.2595270
Leave Link 202 at Wed May 20 12:10:14 2020, MaxMem= 3221225472 cpu: 0.1 elap: 0.0
(Enter /public/apps/g16/l301.exe)
Standard basis: 6-311+G(2d,p) (5D, 7F)
Ernie: Thresh= 0.10000D-02 Tol= 0.10000D-05 Strict=F.
There are 678 symmetry adapted cartesian basis functions of A symmetry.
There are 642 symmetry adapted basis functions of A symmetry.
642 basis functions, 964 primitive gaussians, 678 cartesian basis functions
70 alpha electrons 70 beta electrons
nuclear repulsion energy 1537.8587065953 Hartrees.
IExCor= 3731 DFT=T Ex+Corr=APFD ExCW=0 ScaHFX= 0.229450
ScaDFX= 1.000000 1.000000 1.000000 1.000000 ScalE2= 1.000000 1.000000
IRadAn= 5 IRanWt= -1 IRanGd= 0 ICorTp=0 IEmpDi=211
NAtoms= 44 NActive= 44 NUniq= 44 SFac= 1.00D+00 NAtFMM= 60 NAOKFM=F Big=F
Integral buffers will be 131072 words long.
Regular integral format.
Two-electron integral symmetry is turned on.
R6APFD: NTU= -4 IXU= 1 FactS= 1.050
R6Disp: Petersson-Frisch Dispersion energy= -0.0538329044 Hartrees.
Nuclear repulsion after empirical dispersion term = 1537.8048736909 Hartrees.
------------------------------------------------------------------------------
Polarizable Continuum Model (PCM)
=================================
Model : PCM.
Atomic radii : Bondi.
Polarization charges : Total charges.
Charge compensation : None.
Solution method : Matrix inversion.
Cavity type : Scaled VdW (van der Waals Surface) (Alpha=1.100).
Cavity algorithm : GePol (No added spheres)
Default sphere list used, NSphG= 44.
Lebedev-Laikov grids with approx. 5.0 points / Ang**2.
Smoothing algorithm: York/Karplus (Gamma=1.0000).
Polarization charges: spherical gaussians, with
point-specific exponents (IZeta= 3).
Self-potential: point-specific (ISelfS= 7).
Self-field : sphere-specific E.n sum rule (ISelfD= 2).
Solvent : Methanol, Eps= 32.613000 Eps(inf)= 1.765709
------------------------------------------------------------------------------
GePol: Number of generator spheres = 44
GePol: Total number of spheres = 44
GePol: Number of exposed spheres = 44 (100.00%)
GePol: Number of points = 2410
GePol: Average weight of points = 0.13
GePol: Minimum weight of points = 0.42D-10
GePol: Maximum weight of points = 0.21770
GePol: Number of points with low weight = 204
GePol: Fraction of low-weight points (<1% of avg) = 8.46%
GePol: Cavity surface area = 304.705 Ang**2
GePol: Cavity volume = 298.503 Ang**3
Leave Link 301 at Wed May 20 12:10:14 2020, MaxMem= 3221225472 cpu: 1.0 elap: 0.1
(Enter /public/apps/g16/l302.exe)
NPDir=0 NMtPBC= 1 NCelOv= 1 NCel= 1 NClECP= 1 NCelD= 1
NCelK= 1 NCelE2= 1 NClLst= 1 CellRange= 0.0.
One-electron integrals computed using PRISM.
One-electron integral symmetry used in STVInt
NBasis= 642 RedAO= T EigKep= 1.68D-06 NBF= 642
NBsUse= 640 1.00D-06 EigRej= 6.57D-07 NBFU= 640
Precomputing XC quadrature grid using
IXCGrd= 4 IRadAn= 5 IRanWt= -1 IRanGd= 0 AccXCQ= 0.00D+00.
Generated NRdTot= 0 NPtTot= 0 NUsed= 0 NTot= 32
NSgBfM= 677 677 677 677 677 MxSgAt= 44 MxSgA2= 44.
Leave Link 302 at Wed May 20 12:10:15 2020, MaxMem= 3221225472 cpu: 10.5 elap: 0.9
(Enter /public/apps/g16/l303.exe)
DipDrv: MaxL=1.
Leave Link 303 at Wed May 20 12:10:15 2020, MaxMem= 3221225472 cpu: 0.9 elap: 0.1
(Enter /public/apps/g16/l308.exe)
Leave Link 308 at Wed May 20 12:10:16 2020, MaxMem= 3221225472 cpu: 1.5 elap: 0.2
(Enter /public/apps/g16/l401.exe)
Initial guess from the checkpoint file: "CONF_3_ecd.chk"
B after Tr= 0.000000 0.000000 0.000000
Rot= 1.000000 -0.000000 0.000000 0.000000 Ang= 0.00 deg.
Guess basis will be translated and rotated to current coordinates.
JPrj=2 DoOrth=T DoCkMO=T.
Leave Link 401 at Wed May 20 12:10:16 2020, MaxMem= 3221225472 cpu: 7.8 elap: 0.7
(Enter /public/apps/g16/l502.exe)
Integral symmetry usage will be decided dynamically.
Closed shell SCF:
Using DIIS extrapolation, IDIIS= 1040.
NGot= 3221225472 LenX= 3220290486 LenY= 3219830124
Requested convergence on RMS density matrix=1.00D-08 within 128 cycles.
Requested convergence on MAX density matrix=1.00D-06.
Requested convergence on energy=1.00D-06.
No special actions if energy rises.
Fock matrices will be formed incrementally for 20 cycles.
Cycle 1 Pass 1 IDiag 1:
FoFJK: IHMeth= 1 ICntrl= 0 DoSepK=F KAlg= 0 I1Cent= 0 FoldK=F
IRaf= 880000000 NMat= 1 IRICut= 1 DoRegI=T DoRafI=F ISym2E= 0 IDoP0=0 IntGTp=1.
FoFCou: FMM=F IPFlag= 0 FMFlag= 100000 FMFlg1= 0
NFxFlg= 0 DoJE=F BraDBF=F KetDBF=F FulRan=T
wScrn= 0.000000 ICntrl= 0 IOpCl= 0 I1Cent= 0 NGrid= 0
NMat0= 1 NMatS0= 1 NMatT0= 0 NMatD0= 1 NMtDS0= 0 NMtDT0= 0
Symmetry not used in FoFCou.
Inv3: Mode=1 IEnd= 17424300.
Iteration 1 A*A^-1 deviation from unit magnitude is 2.78D-15 for 1994.
Iteration 1 A*A^-1 deviation from orthogonality is 2.35D-15 for 2020 1198.
Iteration 1 A^-1*A deviation from unit magnitude is 2.89D-15 for 190.
Iteration 1 A^-1*A deviation from orthogonality is 3.11D-14 for 1614 1573.
E= -812.552289281923
DIIS: error= 1.01D-09 at cycle 1 NSaved= 1.
NSaved= 1 IEnMin= 1 EnMin= -812.552289281923 IErMin= 1 ErrMin= 1.01D-09
ErrMax= 1.01D-09 0.00D+00 EMaxC= 1.00D-01 BMatC= 1.29D-15 BMatP= 1.29D-15
IDIUse=1 WtCom= 1.00D+00 WtEn= 0.00D+00
Coeff-Com: 0.100D+01
Coeff: 0.100D+01
Gap= 0.246 Goal= None Shift= 0.000
RMSDP=6.98D-10 MaxDP=1.53D-07 OVMax= 1.14D-08
Error on total polarization charges = 0.04839
SCF Done: E(RAPFD) = -812.552289282 A.U. after 1 cycles
NFock= 1 Conv=0.70D-09 -V/T= 2.0045
KE= 8.089266877454D+02 PE=-4.969008045315D+03 EE= 1.809724194597D+03
Leave Link 502 at Wed May 20 12:10:48 2020, MaxMem= 3221225472 cpu: 375.9 elap: 31.8
(Enter /public/apps/g16/l801.exe)
DoSCS=F DFT=T ScalE2(SS,OS)= 1.000000 1.000000
ExpMin= 4.38D-02 ExpMax= 8.59D+03 ExpMxC= 1.30D+03 IAcc=3 IRadAn= 5 AccDes= 0.00D+00
HarFok: IExCor= 205 AccDes= 0.00D+00 IRadAn= 5 IDoV=-2 UseB2=F ITyADJ=14
ICtDFT= 12500011 ScaDFX= 1.000000 1.000000 1.000000 1.000000
Largest valence mixing into a core orbital is 5.60D-05
Largest core mixing into a valence orbital is 1.38D-05
Range of M.O.s used for correlation: 19 640
NBasis= 642 NAE= 70 NBE= 70 NFC= 18 NFV= 0
NROrb= 622 NOA= 52 NOB= 52 NVA= 570 NVB= 570
**** Warning!!: The largest alpha MO coefficient is 0.12642796D+03
Leave Link 801 at Wed May 20 12:10:48 2020, MaxMem= 3221225472 cpu: 2.1 elap: 0.2
(Enter /public/apps/g16/l914.exe)
RHF ground state
Two-electron integrals replicated using symmetry.
MDV= 3221225472 DFT=T DoStab=F Mixed=T DoRPA=T DoScal=F NonHer=T
NEqPCM: Using non-equilibrium solvation (IEInf=1, Eps= 32.6130, EpsInf= 1.7657)
Inv3: Mode=1 IEnd= 17424300.
Iteration 1 A*A^-1 deviation from unit magnitude is 3.55D-15 for 743.
Iteration 1 A*A^-1 deviation from orthogonality is 2.34D-15 for 2020 1198.
Iteration 1 A^-1*A deviation from unit magnitude is 3.44D-15 for 739.
Iteration 1 A^-1*A deviation from orthogonality is 1.66D-15 for 1707 221.
Making orbital integer symmetry assigments:
Orbital symmetries:
Occupied (A) (A) (A) (A) (A) (A) (A) (A) (A) (A) (A) (A)
(A) (A) (A) (A) (A) (A) (A) (A) (A) (A) (A) (A)
(A) (A) (A) (A) (A) (A) (A) (A) (A) (A) (A) (A)
(A) (A) (A) (A) (A) (A) (A) (A) (A) (A) (A) (A)
(A) (A) (A) (A) (A) (A) (A) (A) (A) (A) (A) (A)
(A) (A) (A) (A) (A) (A) (A) (A) (A) (A)
Virtual (A) (A) (A) (A) (A) (A) (A) (A) (A) (A) (A) (A)
(A) (A) (A) (A) (A) (A) (A) (A) (A) (A) (A) (A)
(A) (A) (A) (A) (A) (A) (A) (A) (A) (A) (A) (A)
(A) (A) (A) (A) (A) (A) (A) (A) (A) (A) (A) (A)
(A) (A) (A) (A) (A) (A) (A) (A) (A) (A) (A) (A)
(A) (A) (A) (A) (A) (A) (A) (A) (A) (A) (A) (A)
(A) (A) (A) (A) (A) (A) (A) (A) (A) (A) (A) (A)
(A) (A) (A) (A) (A) (A) (A) (A) (A) (A) (A) (A)
(A) (A) (A) (A) (A) (A) (A) (A) (A) (A) (A) (A)
(A) (A) (A) (A) (A) (A) (A) (A) (A) (A) (A) (A)
(A) (A) (A) (A) (A) (A) (A) (A) (A) (A) (A) (A)
(A) (A) (A) (A) (A) (A) (A) (A) (A) (A) (A) (A)
(A) (A) (A) (A) (A) (A) (A) (A) (A) (A) (A) (A)
(A) (A) (A) (A) (A) (A) (A) (A) (A) (A) (A) (A)
(A) (A) (A) (A) (A) (A) (A) (A) (A) (A) (A) (A)
(A) (A) (A) (A) (A) (A) (A) (A) (A) (A) (A) (A)
(A) (A) (A) (A) (A) (A) (A) (A) (A) (A) (A) (A)
(A) (A) (A) (A) (A) (A) (A) (A) (A) (A) (A) (A)
(A) (A) (A) (A) (A) (A) (A) (A) (A) (A) (A) (A)
(A) (A) (A) (A) (A) (A) (A) (A) (A) (A) (A) (A)
(A) (A) (A) (A) (A) (A) (A) (A) (A) (A) (A) (A)
(A) (A) (A) (A) (A) (A) (A) (A) (A) (A) (A) (A)
(A) (A) (A) (A) (A) (A) (A) (A) (A) (A) (A) (A)
(A) (A) (A) (A) (A) (A) (A) (A) (A) (A) (A) (A)
(A) (A) (A) (A) (A) (A) (A) (A) (A) (A) (A) (A)
(A) (A) (A) (A) (A) (A) (A) (A) (A) (A) (A) (A)
(A) (A) (A) (A) (A) (A) (A) (A) (A) (A) (A) (A)
(A) (A) (A) (A) (A) (A) (A) (A) (A) (A) (A) (A)
(A) (A) (A) (A) (A) (A) (A) (A) (A) (A) (A) (A)
(A) (A) (A) (A) (A) (A) (A) (A) (A) (A) (A) (A)
(A) (A) (A) (A) (A) (A) (A) (A) (A) (A) (A) (A)
(A) (A) (A) (A) (A) (A) (A) (A) (A) (A) (A) (A)
(A) (A) (A) (A) (A) (A) (A) (A) (A) (A) (A) (A)
(A) (A) (A) (A) (A) (A) (A) (A) (A) (A) (A) (A)
(A) (A) (A) (A) (A) (A) (A) (A) (A) (A) (A) (A)
(A) (A) (A) (A) (A) (A) (A) (A) (A) (A) (A) (A)
(A) (A) (A) (A) (A) (A) (A) (A) (A) (A) (A) (A)
(A) (A) (A) (A) (A) (A) (A) (A) (A) (A) (A) (A)
(A) (A) (A) (A) (A) (A) (A) (A) (A) (A) (A) (A)
(A) (A) (A) (A) (A) (A) (A) (A) (A) (A) (A) (A)
(A) (A) (A) (A) (A) (A) (A) (A) (A) (A) (A) (A)
(A) (A) (A) (A) (A) (A) (A) (A) (A) (A) (A) (A)
(A) (A) (A) (A) (A) (A) (A) (A) (A) (A) (A) (A)
(A) (A) (A) (A) (A) (A) (A) (A) (A) (A) (A) (A)
(A) (A) (A) (A) (A) (A) (A) (A) (A) (A) (A) (A)
(A) (A) (A) (A) (A) (A) (A) (A) (A) (A) (A) (A)
(A) (A) (A) (A) (A) (A) (A) (A) (A) (A) (A) (A)
(A) (A) (A) (A) (A) (A)
400 initial guesses have been made.
Convergence on wavefunction: 0.001000000000000
Davidson Disk Diagonalization: ConvIn= 1.00D-03 SkipCon=T Conv= 1.00D-03.
Max sub-space: 6000 roots to seek: 400 dimension of matrix: 59280
Iteration 1 Dimension 400 NMult 0 NNew 400
CISAX will form 204 AO SS matrices at one time.
NMat= 204 NSing= 204 JSym2X= 0.
FoFJK: IHMeth= 1 ICntrl= 0 DoSepK=F KAlg= 0 I1Cent= 0 FoldK=F
IRaf= 880000000 NMat= 408 IRICut= 510 DoRegI=T DoRafI=T ISym2E= 0 IDoP0=3 IntGTp=3.
NMat= 196 NSing= 196 JSym2X= 0.
New state 2 was old state 5
New state 3 was old state 7
New state 4 was old state 3
New state 5 was old state 6
New state 6 was old state 4
New state 7 was old state 12
New state 10 was old state 11
New state 11 was old state 13
New state 12 was old state 10
New state 13 was old state 19
New state 14 was old state 22
New state 15 was old state 14
New state 16 was old state 15
New state 17 was old state 16
New state 18 was old state 17
New state 19 was old state 18
New state 22 was old state 23
New state 23 was old state 27
New state 24 was old state 42
New state 25 was old state 24
New state 26 was old state 25
New state 27 was old state 26
New state 28 was old state 39
New state 30 was old state 32
New state 31 was old state 34
New state 32 was old state 31
New state 33 was old state 36
New state 34 was old state 28
New state 36 was old state 30
New state 37 was old state 38
New state 38 was old state 33
New state 39 was old state 40
New state 40 was old state 41
New state 41 was old state 37
New state 42 was old state 52
New state 43 was old state 44
New state 44 was old state 43
New state 45 was old state 53
New state 46 was old state 47
New state 47 was old state 49
New state 48 was old state 45
New state 49 was old state 62
New state 50 was old state 46
New state 52 was old state 48
New state 53 was old state 54
New state 54 was old state 57
New state 55 was old state 50
New state 56 was old state 55
New state 57 was old state 56
New state 58 was old state 64
New state 59 was old state 58
New state 60 was old state 71
New state 61 was old state 60
New state 62 was old state 59
New state 63 was old state 61
New state 64 was old state 72
New state 65 was old state 63
New state 66 was old state 70
New state 67 was old state 65
New state 68 was old state 73
New state 69 was old state 84
New state 70 was old state 69
New state 71 was old state 74
New state 72 was old state 66
New state 73 was old state 68
New state 74 was old state 81
New state 75 was old state 67
New state 77 was old state 80
New state 78 was old state 77
New state 79 was old state 100
New state 80 was old state 79
New state 81 was old state 75
New state 83 was old state 78
New state 84 was old state 88
New state 85 was old state 103
New state 86 was old state 85
New state 87 was old state 86
New state 88 was old state 91
New state 89 was old state 87
New state 90 was old state 93
New state 91 was old state 94
New state 92 was old state 89
New state 93 was old state 95
New state 94 was old state 92
New state 95 was old state 99
New state 96 was old state 102
New state 97 was old state 98
New state 98 was old state 96
New state 99 was old state 90
New state 100 was old state 104
Excitation Energies [eV] at current iteration:
Root 1 : 5.964905125639326
Root 2 : 6.372534883554891
Root 3 : 6.477072491001484
Root 4 : 6.575520825712722
Root 5 : 6.609994766721060
Root 6 : 6.648449377163628
Root 7 : 6.786385044228291
Root 8 : 6.888659709012631
Root 9 : 6.966560449466702
Root 10 : 6.979684910778561
Root 11 : 7.026747437191429
Root 12 : 7.117619230155262
Root 13 : 7.174490124029351
Root 14 : 7.217069760364724
Root 15 : 7.228275938688121
Root 16 : 7.259851638192705
Root 17 : 7.313104025440078
Root 18 : 7.345696700655349
Root 19 : 7.355853128499504
Root 20 : 7.399653047846922
Root 21 : 7.430517761522564
Root 22 : 7.446097746051685
Root 23 : 7.501709511519382
Root 24 : 7.536259248201998
Root 25 : 7.638376889848205
Root 26 : 7.685337696357358
Root 27 : 7.709206643165032
Root 28 : 7.737991723355849
Root 29 : 7.773608415778838
Root 30 : 7.776285253390871
Root 31 : 7.803664447118007
Root 32 : 7.825368198029536
Root 33 : 7.839729148037945
Root 34 : 7.849730469738088
Root 35 : 7.864038608542222
Root 36 : 7.901274591261243
Root 37 : 7.906010783282722
Root 38 : 7.934872208960004
Root 39 : 7.941682187580351
Root 40 : 7.968561597595815
Root 41 : 7.994647845168731
Root 42 : 7.999899690525132
Root 43 : 8.025395626743528
Root 44 : 8.041990016584327
Root 45 : 8.068469887130654
Root 46 : 8.116121498209436
Root 47 : 8.154381717493603
Root 48 : 8.176703663916102
Root 49 : 8.189169789970446
Root 50 : 8.194442097233914
Root 51 : 8.226073716830280
Root 52 : 8.236009976487153
Root 53 : 8.242178357178217
Root 54 : 8.259076134447428
Root 55 : 8.277682200640024
Root 56 : 8.301225904900560
Root 57 : 8.330239241194443
Root 58 : 8.351219600041633
Root 59 : 8.362412715361254
Root 60 : 8.398430923391057
Root 61 : 8.411214911542109
Root 62 : 8.414710696297664
Root 63 : 8.422775959640736
Root 64 : 8.447262654175693
Root 65 : 8.451615669538612
Root 66 : 8.465090231852869
Root 67 : 8.492546606661405
Root 68 : 8.521973988226906
Root 69 : 8.537728916049202
Root 70 : 8.554535701121450
Root 71 : 8.560993338971436
Root 72 : 8.564405830261354
Root 73 : 8.584672862468993
Root 74 : 8.592290481528682
Root 75 : 8.596307233876235
Root 76 : 8.634994066282953
Root 77 : 8.639136613983791
Root 78 : 8.670358618450946
Root 79 : 8.683344561415641
Root 80 : 8.699453607194171
Root 81 : 8.701765722939609
Root 82 : 8.724542170319101
Root 83 : 8.730879540099773
Root 84 : 8.734869039585897
Root 85 : 8.747699595395973
Root 86 : 8.763004384635261
Root 87 : 8.777388168409329
Root 88 : 8.783330889360775
Root 89 : 8.794336208709174
Root 90 : 8.808898567112371
Root 91 : 8.816766813942335
Root 92 : 8.821549855043640
Root 93 : 8.850572408318126
Root 94 : 8.856734868193620
Root 95 : 8.865942988446019
Root 96 : 8.866755038379786
Root 97 : 8.889259769397427
Root 98 : 8.897239899850796
Root 99 : 8.909314989416959
Root 100 : 8.926521816876376
Root 101 : 8.934258335687453
Root 102 : 8.938367503290875
Root 103 : 8.956605710696067
Root 104 : 8.967480223216461
Root 105 : 8.989594148735533
Root 106 : 8.995194366407640
Root 107 : 9.002434935288932
Root 108 : 9.004097701373535
Root 109 : 9.051548958281067
Root 110 : 9.059406024022811
Root 111 : 9.066111951191607
Root 112 : 9.081061714805163
Root 113 : 9.096154746179147
Root 114 : 9.099503204270219
Root 115 : 9.103274785973653
Root 116 : 9.126206576846647
Root 117 : 9.136650701070931
Root 118 : 9.151807816348516
Root 119 : 9.155257213984864
Root 120 : 9.169074478794853
Root 121 : 9.186807135293709
Root 122 : 9.194127260182491
Root 123 : 9.202658709511505
Root 124 : 9.215618237905261
Root 125 : 9.219918241364894
Root 126 : 9.224735650629226
Root 127 : 9.227847950302392
Root 128 : 9.252390360172166
Root 129 : 9.256970678820553
Root 130 : 9.265323595133312
Root 131 : 9.287572048906851
Root 132 : 9.297403474906851
Root 133 : 9.306579104695819
Root 134 : 9.310216022511597
Root 135 : 9.319288269087089
Root 136 : 9.330193680520457
Root 137 : 9.342357193530640
Root 138 : 9.354832497090424
Root 139 : 9.362169723491659
Root 140 : 9.370061166496042
Root 141 : 9.377569781991301
Root 142 : 9.390605386830323
Root 143 : 9.403620725017223
Root 144 : 9.415062071589277
Root 145 : 9.422755744160009
Root 146 : 9.438194384185046
Root 147 : 9.446678445974593
Root 148 : 9.454511558532825
Root 149 : 9.466445685569184
Root 150 : 9.470225236275029
Root 151 : 9.475285392117227
Root 152 : 9.477806619278230
Root 153 : 9.489086260284704
Root 154 : 9.498448290272163
Root 155 : 9.508569407968329
Root 156 : 9.513476113118660
Root 157 : 9.520878368140831
Root 158 : 9.523422494409809
Root 159 : 9.533360368071765
Root 160 : 9.542359916459363
Root 161 : 9.560999934854809
Root 162 : 9.565359574209371
Root 163 : 9.574661910492836
Root 164 : 9.581475284636326
Root 165 : 9.591169289321281
Root 166 : 9.598799459964036
Root 167 : 9.603079744548644
Root 168 : 9.608086847528167
Root 169 : 9.610870750648076
Root 170 : 9.619719504018688
Root 171 : 9.625899980598076
Root 172 : 9.632458853334956
Root 173 : 9.638585461876197
Root 174 : 9.644020061621477
Root 175 : 9.650377766535977
Root 176 : 9.659301254803884
Root 177 : 9.662613155149650
Root 178 : 9.666247937956673
Root 179 : 9.678396938879704
Root 180 : 9.679044775396186
Root 181 : 9.690886505409793
Root 182 : 9.704022255631505
Root 183 : 9.715004096570636
Root 184 : 9.716317061183553
Root 185 : 9.722569764602873
Root 186 : 9.725992491896642
Root 187 : 9.736708216099895
Root 188 : 9.741187726892118
Root 189 : 9.753434299250511
Root 190 : 9.764341544650406
Root 191 : 9.769256088918764
Root 192 : 9.773447639335735
Root 193 : 9.787769241013304
Root 194 : 9.793170210079339
Root 195 : 9.804033712135517
Root 196 : 9.813133957682250
Root 197 : 9.818876851495217
Root 198 : 9.823400173662524
Root 199 : 9.824188846071253
Root 200 : 9.849878143099945
Root 201 : 9.855985665261814
Root 202 : 9.861252530713257
Root 203 : 9.870341417225395
Root 204 : 9.876708494716123
Root 205 : 9.886846994943882
Root 206 : 9.893376374280372
Root 207 : 9.899723047005148
Root 208 : 9.907125158455337
Root 209 : 9.918735766455200
Root 210 : 9.928153363902881
Root 211 : 9.941167356236532
Root 212 : 9.944191829257615
Root 213 : 9.951403695476017
Root 214 : 9.963140391065130
Root 215 : 9.970270875969728
Root 216 : 9.973258409080197
Root 217 : 9.985508229756228
Root 218 : 9.991712848209442
Root 219 : 9.998642796415654
Root 220 : 10.006451575847009
Root 221 : 10.009545395778932
Root 222 : 10.028700956556751
Root 223 : 10.033873350790451
Root 224 : 10.042728993973549
Root 225 : 10.053767258603237
Root 226 : 10.056616757008863
Root 227 : 10.061775871383592
Root 228 : 10.077548313742630
Root 229 : 10.079603280728259
Root 230 : 10.090934482285318
Root 231 : 10.094356395836224
Root 232 : 10.101218985480989
Root 233 : 10.113902444693455
Root 234 : 10.120575560359946
Root 235 : 10.123559123796948
Root 236 : 10.134326254744408
Root 237 : 10.137749632924994
Root 238 : 10.143865542838290
Root 239 : 10.147796802468511
Root 240 : 10.151804235632353
Root 241 : 10.159015822229488
Root 242 : 10.168540814821968
Root 243 : 10.173947152445185
Root 244 : 10.176173730054881
Root 245 : 10.190963804010250
Root 246 : 10.191313164729079
Root 247 : 10.196239254200375
Root 248 : 10.209083623395951
Root 249 : 10.212033694314092
Root 250 : 10.215550932288492
Root 251 : 10.219022552870440
Root 252 : 10.227788765808352
Root 253 : 10.234157963604257
Root 254 : 10.237824736744708
Root 255 : 10.245174777077176
Root 256 : 10.254701229549642
Root 257 : 10.258981995542866
Root 258 : 10.260865191887612
Root 259 : 10.269167888343256
Root 260 : 10.271691567871411
Root 261 : 10.281851849419107
Root 262 : 10.287530390044203
Root 263 : 10.292417534460361
Root 264 : 10.296071796092400
Root 265 : 10.301705588875091
Root 266 : 10.306442868329158
Root 267 : 10.313148859284464
Root 268 : 10.320617953151579
Root 269 : 10.325225976514469
Root 270 : 10.336334587959579
Root 271 : 10.338004691839178
Root 272 : 10.342198714891103
Root 273 : 10.345678452995811
Root 274 : 10.350312678824109
Root 275 : 10.362458981676829
Root 276 : 10.369981831283845
Root 277 : 10.374180226639266
Root 278 : 10.382613549081718
Root 279 : 10.385494958419862
Root 280 : 10.391460814680833
Root 281 : 10.395954472767841
Root 282 : 10.399152280211229
Root 283 : 10.407552014573882
Root 284 : 10.420034519373042
Root 285 : 10.425307722818905
Root 286 : 10.430918213169850
Root 287 : 10.438555005229365
Root 288 : 10.448968747014238
Root 289 : 10.458701488514679
Root 290 : 10.465732633096460
Root 291 : 10.468095408321004
Root 292 : 10.472423944062260
Root 293 : 10.479338374346401
Root 294 : 10.488043516461664
Root 295 : 10.490312008821720
Root 296 : 10.492570470769582
Root 297 : 10.500353587213766
Root 298 : 10.510560410389445
Root 299 : 10.514592196939043
Root 300 : 10.521974953792579
Root 301 : 10.526432251795523
Root 302 : 10.531064416500875
Root 303 : 10.534923007801028
Root 304 : 10.542833705749160
Root 305 : 10.545265894774483
Root 306 : 10.547745350313871
Root 307 : 10.553725265785481
Root 308 : 10.559481401527789
Root 309 : 10.565403437580571
Root 310 : 10.576376082431720
Root 311 : 10.579971690587868
Root 312 : 10.583362498100415
Root 313 : 10.589745759105289
Root 314 : 10.607025963947214
Root 315 : 10.623926836489588
Root 316 : 10.628810382707472
Root 317 : 10.634004382727413
Root 318 : 10.647088385730255
Root 319 : 10.651197768241925
Root 320 : 10.652520655439560
Root 321 : 10.655095777670592
Root 322 : 10.659486517741996
Root 323 : 10.666012787920966
Root 324 : 10.668818140442317
Root 325 : 10.674474523399271
Root 326 : 10.678256437047603
Root 327 : 10.684056879740977
Root 328 : 10.686819666668255
Root 329 : 10.694786875120460
Root 330 : 10.701092636877719
Root 331 : 10.703836202368215
Root 332 : 10.712613044492585
Root 333 : 10.717617538325097
Root 334 : 10.725541432589914
Root 335 : 10.737931193626308
Root 336 : 10.741745876863746
Root 337 : 10.742628908174821
Root 338 : 10.754684256984428
Root 339 : 10.760002131307747
Root 340 : 10.762914099284849
Root 341 : 10.771084806757175
Root 342 : 10.775815029424459
Root 343 : 10.781983476408891
Root 344 : 10.784166917425468
Root 345 : 10.789725970499928
Root 346 : 10.796803842215015
Root 347 : 10.799836057235584
Root 348 : 10.804232071838461
Root 349 : 10.812188777733219
Root 350 : 10.816603802768984
Root 351 : 10.823360765430378
Root 352 : 10.827608954392092
Root 353 : 10.832672370884762
Root 354 : 10.834692739165675
Root 355 : 10.838821661013068
Root 356 : 10.840872095623501
Root 357 : 10.848975710750208
Root 358 : 10.854691087312149
Root 359 : 10.858431235269409
Root 360 : 10.864995788301366
Root 361 : 10.868327801617607
Root 362 : 10.872641428868876
Root 363 : 10.881009250168491
Root 364 : 10.885128212178895
Root 365 : 10.890237305554649
Root 366 : 10.894427597565617
Root 367 : 10.899030141314773
Root 368 : 10.904870482145556
Root 369 : 10.910530854796216
Root 370 : 10.916958317365244
Root 371 : 10.919733342441903
Root 372 : 10.925385679161279
Root 373 : 10.927575433630784
Root 374 : 10.934356903536774
Root 375 : 10.937889072448142
Root 376 : 10.944491350313504
Root 377 : 10.953937992626487
Root 378 : 10.958365601520081
Root 379 : 10.964974460145646
Root 380 : 10.969509532736707
Root 381 : 10.987037385138862
Root 382 : 10.993521607206565
Root 383 : 10.994787555761855
Root 384 : 10.997037264168830
Root 385 : 10.999572874659867
Root 386 : 11.017856045265672
Root 387 : 11.024151553736269
Root 388 : 11.028697745404598
Root 389 : 11.040976539543500
Root 390 : 11.045269036580130
Root 391 : 11.049793776628396
Root 392 : 11.070062768587549
Root 393 : 11.071178318315866
Root 394 : 11.088435981076492
Root 395 : 11.097659340874964
Root 396 : 11.104543429202559
Root 397 : 11.110380735698435
Root 398 : 11.125973145863124
Root 399 : 11.128190863675160
Root 400 : 11.144912878155301
Iteration 2 Dimension 600 NMult 400 NNew 200
CISAX will form 200 AO SS matrices at one time.
NMat= 200 NSing= 200 JSym2X= 0.
Root 1 not converged, maximum delta is 0.169515416786731
Root 2 not converged, maximum delta is 0.305519769507982
Root 3 not converged, maximum delta is 0.258092737000186
Root 4 not converged, maximum delta is 0.102607180552781
Root 5 not converged, maximum delta is 0.050461578304345
Root 6 not converged, maximum delta is 0.237867022757730
Root 7 not converged, maximum delta is 0.200335341280524
Root 8 not converged, maximum delta is 0.301175685122222
Root 9 not converged, maximum delta is 0.372640995955058
Root 10 not converged, maximum delta is 0.147208376586282
Root 11 not converged, maximum delta is 0.168470397689338
Root 12 not converged, maximum delta is 0.174146908115124
Root 13 not converged, maximum delta is 0.251103813458887
New state 14 was old state 15
Root 14 not converged, maximum delta is 0.318411494794709
New state 15 was old state 14
Root 15 not converged, maximum delta is 0.105582895390477
Root 16 not converged, maximum delta is 0.300440751784790
New state 17 was old state 22
Root 17 not converged, maximum delta is 0.417895743206257
New state 18 was old state 17
Root 18 not converged, maximum delta is 0.070284488980122
New state 19 was old state 18
Root 19 not converged, maximum delta is 0.267738766912079
New state 20 was old state 19
Root 20 not converged, maximum delta is 0.345023691559485
New state 21 was old state 20
Root 21 not converged, maximum delta is 0.193033947639461
New state 22 was old state 21
Root 22 not converged, maximum delta is 0.258189171850569
Root 23 not converged, maximum delta is 0.125109153766413
Root 24 not converged, maximum delta is 0.117952409690830
Root 25 not converged, maximum delta is 0.056995843522290
Root 26 not converged, maximum delta is 0.052518845339016
Root 27 not converged, maximum delta is 0.085634830502919
Root 28 not converged, maximum delta is 0.101077019488182
New state 29 was old state 30
Root 29 not converged, maximum delta is 0.203763410215031
New state 30 was old state 29
Root 30 not converged, maximum delta is 0.175760965834289
Root 31 not converged, maximum delta is 0.075121803870510
Root 32 not converged, maximum delta is 0.236004799373641
Root 33 not converged, maximum delta is 0.280826939721918
Root 34 not converged, maximum delta is 0.137479245885618
Root 35 not converged, maximum delta is 0.107014207194067
Root 36 not converged, maximum delta is 0.343467270299678
Root 37 not converged, maximum delta is 0.220768955416862
Root 38 not converged, maximum delta is 0.136661021517812
Root 39 not converged, maximum delta is 0.166362803682496
Root 40 not converged, maximum delta is 0.248603369190249
New state 41 was old state 43
Root 41 not converged, maximum delta is 0.412658544941690
Root 42 not converged, maximum delta is 0.150869717479255
New state 43 was old state 41
Root 43 not converged, maximum delta is 0.195273618065620
Root 44 not converged, maximum delta is 0.257018955442630
Root 45 not converged, maximum delta is 0.131497445582790
Root 46 not converged, maximum delta is 0.071563390222904
Root 47 not converged, maximum delta is 0.092164745298574
Root 48 not converged, maximum delta is 0.151513872190778
Root 49 not converged, maximum delta is 0.083771663385553
Root 50 not converged, maximum delta is 0.109197681071226
Root 51 not converged, maximum delta is 0.062313617183802
New state 52 was old state 53
Root 52 not converged, maximum delta is 0.123451737774869
New state 53 was old state 52
Root 53 not converged, maximum delta is 0.110308407248468
Root 54 not converged, maximum delta is 0.126261869353385
Root 55 not converged, maximum delta is 0.076188408701775
Root 56 not converged, maximum delta is 0.080752256802466
Root 57 not converged, maximum delta is 0.051859478253759
Root 58 not converged, maximum delta is 0.321682142613233
Root 59 not converged, maximum delta is 0.368470036224621
Root 60 not converged, maximum delta is 0.137535840291890
New state 61 was old state 62
Root 61 not converged, maximum delta is 0.350555578337557
New state 62 was old state 61
Root 62 not converged, maximum delta is 0.436095761274505
Root 63 not converged, maximum delta is 0.191538805780117
Root 64 not converged, maximum delta is 0.215767247187966
Root 65 not converged, maximum delta is 0.259540453954618
Root 66 not converged, maximum delta is 0.113912145960046
Root 67 not converged, maximum delta is 0.045982352244483
New state 68 was old state 69
Root 68 not converged, maximum delta is 0.301129297238554
New state 69 was old state 68
Root 69 not converged, maximum delta is 0.234181265602051
New state 70 was old state 71
Root 70 not converged, maximum delta is 0.498745522192561
New state 71 was old state 70
Root 71 not converged, maximum delta is 0.182858257708702
Root 72 not converged, maximum delta is 0.192908787027435
Root 73 not converged, maximum delta is 0.059189981010374
Root 74 not converged, maximum delta is 0.232687304008943
Root 75 not converged, maximum delta is 0.232624758099914
Root 76 not converged, maximum delta is 0.202465792457750
Root 77 not converged, maximum delta is 0.254705331238764
Root 78 not converged, maximum delta is 0.287117666967368
Root 79 not converged, maximum delta is 0.238988785867723
Root 80 not converged, maximum delta is 0.269195977794237
Root 81 not converged, maximum delta is 0.417989172655501
New state 82 was old state 84
Root 82 not converged, maximum delta is 0.350803696113032
New state 83 was old state 82
Root 83 not converged, maximum delta is 0.088180793051695
New state 84 was old state 83
Root 84 not converged, maximum delta is 0.107751675934824
Root 85 not converged, maximum delta is 0.265349413258194
Root 86 not converged, maximum delta is 0.114906114662680
Root 87 not converged, maximum delta is 0.209799590798502
Root 88 not converged, maximum delta is 0.304257468337248
Root 89 not converged, maximum delta is 0.226804761943683
New state 90 was old state 91
Root 90 not converged, maximum delta is 0.205602718503273
New state 91 was old state 90
Root 91 not converged, maximum delta is 0.141017412746766
Root 92 not converged, maximum delta is 0.072957294926160
Root 93 not converged, maximum delta is 0.167266728642700
New state 94 was old state 96
Root 94 not converged, maximum delta is 0.289278762580074
New state 95 was old state 94
Root 95 not converged, maximum delta is 0.140604161286029
New state 96 was old state 95
Root 96 not converged, maximum delta is 0.051197617551952
Root 97 not converged, maximum delta is 0.074997565690640
Root 98 not converged, maximum delta is 0.123201347686667
Root 99 not converged, maximum delta is 0.151644015513636
Root 100 not converged, maximum delta is 0.076616248399860
Excitation Energies [eV] at current iteration:
Root 1 : 5.874271486372704 Change is -0.090633639266622
Root 2 : 6.271572301735263 Change is -0.100962581819628
Root 3 : 6.393525798824992 Change is -0.083546692176491
Root 4 : 6.543879714580428 Change is -0.031641111132294
Root 5 : 6.589109936409820 Change is -0.020884830311240
Root 6 : 6.620379463233923 Change is -0.028069913929705
Root 7 : 6.706754329102745 Change is -0.079630715125546
Root 8 : 6.837052878879618 Change is -0.051606830133013
Root 9 : 6.885825671796137 Change is -0.080734777670565
Root 10 : 6.950546534998165 Change is -0.029138375780396
Root 11 : 7.001857526343513 Change is -0.024889910847916
Root 12 : 7.100590742215247 Change is -0.017028487940015
Root 13 : 7.135489672753988 Change is -0.039000451275362
Root 14 : 7.176283309210238 Change is -0.051992629477882
Root 15 : 7.186735824269959 Change is -0.030333936094764
Root 16 : 7.227663537343880 Change is -0.032188100848825
Root 17 : 7.252280409750259 Change is -0.193817336301425
Root 18 : 7.292731643168851 Change is -0.020372382271226
Root 19 : 7.327657473688411 Change is -0.018039226966938
Root 20 : 7.334875251024799 Change is -0.020977877474705
Root 21 : 7.386462051927066 Change is -0.013190995919855
Root 22 : 7.415688579436755 Change is -0.014829182085810
Root 23 : 7.477469778407321 Change is -0.024239733112061
Root 24 : 7.506578894389798 Change is -0.029680353812200
Root 25 : 7.616679331270611 Change is -0.021697558577594
Root 26 : 7.668990023646275 Change is -0.016347672711083
Root 27 : 7.686101866477227 Change is -0.023104776687805
Root 28 : 7.704768249402567 Change is -0.033223473953283
Root 29 : 7.741558158298239 Change is -0.034727095092632
Root 30 : 7.747131464852468 Change is -0.026476950926370
Root 31 : 7.780283041095938 Change is -0.023381406022069
Root 32 : 7.804231714023788 Change is -0.021136484005749
Root 33 : 7.809272474607482 Change is -0.030456673430462
Root 34 : 7.830974391080913 Change is -0.018756078657175
Root 35 : 7.843078267066621 Change is -0.020960341475600
Root 36 : 7.872135877241156 Change is -0.029138714020086
Root 37 : 7.885361492047064 Change is -0.020649291235658
Root 38 : 7.910629230604163 Change is -0.024242978355841
Root 39 : 7.922058829581911 Change is -0.019623357998440
Root 40 : 7.935550088578949 Change is -0.033011509016866
Root 41 : 7.965308667348211 Change is -0.060086959395317
Root 42 : 7.966918972748599 Change is -0.032980717776533
Root 43 : 7.979573679511707 Change is -0.015074165657025
Root 44 : 8.009851958241301 Change is -0.032138058343025
Root 45 : 8.047822008674361 Change is -0.020647878456292
Root 46 : 8.088845485927953 Change is -0.027276012281483
Root 47 : 8.124734436446891 Change is -0.029647281046711
Root 48 : 8.144840853750202 Change is -0.031862810165901
Root 49 : 8.167593120148837 Change is -0.021576669821611
Root 50 : 8.179377683397261 Change is -0.015064413836654
Root 51 : 8.204327854201720 Change is -0.021745862628560
Root 52 : 8.213041570201655 Change is -0.029136786976562
Root 53 : 8.215493299713733 Change is -0.020516676773419
Root 54 : 8.234609675756017 Change is -0.024466458691411
Root 55 : 8.260217564965307 Change is -0.017464635674718
Root 56 : 8.280546189250716 Change is -0.020679715649844
Root 57 : 8.311091777936834 Change is -0.019147463257609
Root 58 : 8.326433261503775 Change is -0.024786338537858
Root 59 : 8.332924625577800 Change is -0.029488089783455
Root 60 : 8.368990475070978 Change is -0.029440448320079
Root 61 : 8.387234536908803 Change is -0.027476159388862
Root 62 : 8.394637019660257 Change is -0.016577891881853
Root 63 : 8.400347690605656 Change is -0.022428269035080
Root 64 : 8.409367352610868 Change is -0.037895301564826
Root 65 : 8.419501920888520 Change is -0.032113748650092
Root 66 : 8.440091014511363 Change is -0.024999217341507
Root 67 : 8.469031995850324 Change is -0.023514610811081
Root 68 : 8.489751108594136 Change is -0.047977807455065
Root 69 : 8.501947504168090 Change is -0.020026484058815
Root 70 : 8.522279430018267 Change is -0.038713908953168
Root 71 : 8.534462241093156 Change is -0.020073460028296
Root 72 : 8.542294489404021 Change is -0.022111340857332
Root 73 : 8.557022277923709 Change is -0.027650584545284
Root 74 : 8.560843901367903 Change is -0.031446580160779
Root 75 : 8.569407479746809 Change is -0.026899754129426
Root 76 : 8.605230041609540 Change is -0.029764024673414
Root 77 : 8.613566276923443 Change is -0.025570337060347
Root 78 : 8.635854460283007 Change is -0.034504158167940
Root 79 : 8.640881268585291 Change is -0.042463292830349
Root 80 : 8.670101061014940 Change is -0.029352546179229
Root 81 : 8.676793503965863 Change is -0.024972218973746
Root 82 : 8.678570102270546 Change is -0.056298937315352
Root 83 : 8.694598300363925 Change is -0.029943869955176
Root 84 : 8.709730395967828 Change is -0.021149144131944
Root 85 : 8.719382232898790 Change is -0.028317362497183
Root 86 : 8.741862122661081 Change is -0.021142261974180
Root 87 : 8.747428380225649 Change is -0.029959788183681
Root 88 : 8.762806822253426 Change is -0.020524067107350
Root 89 : 8.771968656476426 Change is -0.022367552232747
Root 90 : 8.778645582455429 Change is -0.038121231486905
Root 91 : 8.788558993176267 Change is -0.020339573936105
Root 92 : 8.797286317959895 Change is -0.024263537083747
Root 93 : 8.820552563171614 Change is -0.030019845146511
Root 94 : 8.833135453613144 Change is -0.033619584766643
Root 95 : 8.834850342340911 Change is -0.021884525852710
Root 96 : 8.845085548337980 Change is -0.020857440108039
Root 97 : 8.865295241388809 Change is -0.023964528008617
Root 98 : 8.868298406766948 Change is -0.028941493083847
Root 99 : 8.889155003732569 Change is -0.020159985684391
Root 100 : 8.902266680818389 Change is -0.024255136057987
Iteration 3 Dimension 800 NMult 600 NNew 200
CISAX will form 200 AO SS matrices at one time.
NMat= 200 NSing= 200 JSym2X= 0.
Root 1 not converged, maximum delta is 0.003410737261395
Root 2 not converged, maximum delta is 0.005211488629639
Root 3 not converged, maximum delta is 0.003964108651612
Root 4 not converged, maximum delta is 0.001696644780978
Root 5 not converged, maximum delta is 0.002238842941238
Root 6 not converged, maximum delta is 0.006725792850679
Root 7 not converged, maximum delta is 0.004464818886764
Root 8 not converged, maximum delta is 0.006071349550602
Root 9 not converged, maximum delta is 0.005857174924022
Root 10 not converged, maximum delta is 0.001830003957174
Root 11 not converged, maximum delta is 0.001912561797966
Root 12 not converged, maximum delta is 0.005722374122305
Root 13 not converged, maximum delta is 0.007911931303650
Root 14 not converged, maximum delta is 0.005934288843093
Root 15 not converged, maximum delta is 0.001379278662448
Root 16 not converged, maximum delta is 0.004429256080944
Root 17 not converged, maximum delta is 0.004270506492552
Root 18 not converged, maximum delta is 0.001599753134551
Root 19 not converged, maximum delta is 0.003722313049777
Root 20 not converged, maximum delta is 0.005295190526743
Root 21 not converged, maximum delta is 0.001127340243918
Root 22 not converged, maximum delta is 0.001210254780228
Root 23 not converged, maximum delta is 0.003269846965474
Root 24 not converged, maximum delta is 0.002287411278946
Root 25 has converged.
Root 26 not converged, maximum delta is 0.002033506805587
Root 27 not converged, maximum delta is 0.001077845080985
Root 28 not converged, maximum delta is 0.001994006756238
Root 29 not converged, maximum delta is 0.002371459652413
Root 30 not converged, maximum delta is 0.002080702289454
Root 31 not converged, maximum delta is 0.001908829805454
Root 32 not converged, maximum delta is 0.010251099816961
Root 33 not converged, maximum delta is 0.011685251215768
Root 34 not converged, maximum delta is 0.002933810719984
Root 35 not converged, maximum delta is 0.002300250031662
Root 36 not converged, maximum delta is 0.002822638730976
Root 37 not converged, maximum delta is 0.001858476957825
Root 38 not converged, maximum delta is 0.003515072359807
Root 39 not converged, maximum delta is 0.013332683365848
Root 40 not converged, maximum delta is 0.013539409321891
Root 41 not converged, maximum delta is 0.022066344295710
Root 42 not converged, maximum delta is 0.013931052048037
Root 43 not converged, maximum delta is 0.003512563070690
Root 44 not converged, maximum delta is 0.002239531581405
Root 45 not converged, maximum delta is 0.001891216980175
Root 46 not converged, maximum delta is 0.002426518989983
Root 47 not converged, maximum delta is 0.002786022941577
Root 48 not converged, maximum delta is 0.001610745876823
Root 49 not converged, maximum delta is 0.001601942593430
Root 50 not converged, maximum delta is 0.001017903100146
Root 51 not converged, maximum delta is 0.003752301705252
Root 52 not converged, maximum delta is 0.015590447976732
Root 53 not converged, maximum delta is 0.017111460256735
Root 54 not converged, maximum delta is 0.003263150373115
Root 55 not converged, maximum delta is 0.002925219739710
Root 56 not converged, maximum delta is 0.003250554922758
Root 57 not converged, maximum delta is 0.001800554167824
Root 58 not converged, maximum delta is 0.008006678181685
Root 59 not converged, maximum delta is 0.010324648696444
Root 60 not converged, maximum delta is 0.004076455161538
Root 61 not converged, maximum delta is 0.003806999342853
Root 62 not converged, maximum delta is 0.010045467725933
Root 63 not converged, maximum delta is 0.010796834265399
Root 64 not converged, maximum delta is 0.004599603373368
Root 65 not converged, maximum delta is 0.002923418914815
Root 66 not converged, maximum delta is 0.002476598214981
Root 67 not converged, maximum delta is 0.001361397149450
Root 68 not converged, maximum delta is 0.007879116456018
Root 69 not converged, maximum delta is 0.010007924481961
Root 70 not converged, maximum delta is 0.003989045261380
Root 71 not converged, maximum delta is 0.003779042634905
Root 72 not converged, maximum delta is 0.006324711695501
Root 73 not converged, maximum delta is 0.003402112327105
Root 74 not converged, maximum delta is 0.008821192937986
Root 75 not converged, maximum delta is 0.004279778621313
Root 76 not converged, maximum delta is 0.011726097137712
Root 77 not converged, maximum delta is 0.012506194161216
Root 78 not converged, maximum delta is 0.020571239036734
Root 79 not converged, maximum delta is 0.027606584620384
Root 80 not converged, maximum delta is 0.009167349533961
Root 81 not converged, maximum delta is 0.098821050073740
Root 82 not converged, maximum delta is 0.083734200624635
Root 83 not converged, maximum delta is 0.002875078797377
Root 84 not converged, maximum delta is 0.002841962798068
Root 85 not converged, maximum delta is 0.006353622990312
Root 86 not converged, maximum delta is 0.011777991766798
Root 87 not converged, maximum delta is 0.008283395150340
Root 88 not converged, maximum delta is 0.008371379489705
Root 89 not converged, maximum delta is 0.013924948258922
Root 90 not converged, maximum delta is 0.019012976090186
Root 91 not converged, maximum delta is 0.005216534413103
Root 92 not converged, maximum delta is 0.003243882924005
Root 93 not converged, maximum delta is 0.009226356658911
Root 94 not converged, maximum delta is 0.038189928057433
Root 95 not converged, maximum delta is 0.016379487430729
Root 96 not converged, maximum delta is 0.001945515380491
Root 97 not converged, maximum delta is 0.011083327553663
Root 98 not converged, maximum delta is 0.020891759954927
Root 99 not converged, maximum delta is 0.035524324612153
Root 100 not converged, maximum delta is 0.083918642067706
Excitation Energies [eV] at current iteration:
Root 1 : 5.872343449076592 Change is -0.001928037296112
Root 2 : 6.269343670725520 Change is -0.002228631009744
Root 3 : 6.392437763539008 Change is -0.001088035285985
Root 4 : 6.543209491228462 Change is -0.000670223351966
Root 5 : 6.588684404927694 Change is -0.000425531482126
Root 6 : 6.619729443331707 Change is -0.000650019902216
Root 7 : 6.705612153821045 Change is -0.001142175281701
Root 8 : 6.835929540178352 Change is -0.001123338701266
Root 9 : 6.884754721467589 Change is -0.001070950328548
Root 10 : 6.949929344565159 Change is -0.000617190433007
Root 11 : 7.001536038880853 Change is -0.000321487462660
Root 12 : 7.100198968638605 Change is -0.000391773576643
Root 13 : 7.134753378576121 Change is -0.000736294177868
Root 14 : 7.175212829860383 Change is -0.001070479349856
Root 15 : 7.186109408589664 Change is -0.000626415680295
Root 16 : 7.227075465232744 Change is -0.000588072111136
Root 17 : 7.251365544495006 Change is -0.000914865255253
Root 18 : 7.292347870160537 Change is -0.000383773008315
Root 19 : 7.327059894641189 Change is -0.000597579047222
Root 20 : 7.334401093325623 Change is -0.000474157699176
Root 21 : 7.386004295790700 Change is -0.000457756136366
Root 22 : 7.415269976705083 Change is -0.000418602731672
Root 23 : 7.476974334217888 Change is -0.000495444189433
Root 24 : 7.506165723843529 Change is -0.000413170546269
Root 25 : 7.616285026708203 Change is -0.000394304562408
Root 26 : 7.668639806763082 Change is -0.000350216883194
Root 27 : 7.685671820589064 Change is -0.000430045888163
Root 28 : 7.704052511788551 Change is -0.000715737614015
Root 29 : 7.740867886082839 Change is -0.000690272215400
Root 30 : 7.746484601330430 Change is -0.000646863522039
Root 31 : 7.779826851300352 Change is -0.000456189795586
Root 32 : 7.803749067812756 Change is -0.000482646211032
Root 33 : 7.808735017095909 Change is -0.000537457511573
Root 34 : 7.830561061477669 Change is -0.000413329603244
Root 35 : 7.842668503895267 Change is -0.000409763171354
Root 36 : 7.871625886039892 Change is -0.000509991201264
Root 37 : 7.884992367452859 Change is -0.000369124594206
Root 38 : 7.910232425055044 Change is -0.000396805549120
Root 39 : 7.921483761997600 Change is -0.000575067584311
Root 40 : 7.934679782397293 Change is -0.000870306181656
Root 41 : 7.964645286669417 Change is -0.000663380678793
Root 42 : 7.966368996046444 Change is -0.000549976702155
Root 43 : 7.979250001425065 Change is -0.000323678086642
Root 44 : 8.009251999450667 Change is -0.000599958790634
Root 45 : 8.047524367445874 Change is -0.000297641228488
Root 46 : 8.088211994863274 Change is -0.000633491064680
Root 47 : 8.124095667605145 Change is -0.000638768841747
Root 48 : 8.144346219972659 Change is -0.000494633777543
Root 49 : 8.167156062354691 Change is -0.000437057794145
Root 50 : 8.179087108453153 Change is -0.000290574944108
Root 51 : 8.203828124199815 Change is -0.000499730001907
Root 52 : 8.212430479304349 Change is -0.000611090897307
Root 53 : 8.215073536793431 Change is -0.000419762920302
Root 54 : 8.234067536221433 Change is -0.000542139534584
Root 55 : 8.259859263604080 Change is -0.000358301361228
Root 56 : 8.280112955652552 Change is -0.000433233598165
Root 57 : 8.310657354396989 Change is -0.000434423539846
Root 58 : 8.325681790806540 Change is -0.000751470697235
Root 59 : 8.332349912048004 Change is -0.000574713529795
Root 60 : 8.368267843138966 Change is -0.000722631932014
Root 61 : 8.386700648356737 Change is -0.000533888552066
Root 62 : 8.394232954122803 Change is -0.000404065537454
Root 63 : 8.399917512947752 Change is -0.000430177657904
Root 64 : 8.408599145753906 Change is -0.000768206856962
Root 65 : 8.418834491086059 Change is -0.000667429802461
Root 66 : 8.439585195580346 Change is -0.000505818931018
Root 67 : 8.468501598271725 Change is -0.000530397578599
Root 68 : 8.488601870483025 Change is -0.001149238111112
Root 69 : 8.501342222999730 Change is -0.000605281168360
Root 70 : 8.521570627892853 Change is -0.000708802125415
Root 71 : 8.533935223169863 Change is -0.000527017923293
Root 72 : 8.541753209917070 Change is -0.000541279486951
Root 73 : 8.556325053522126 Change is -0.000697224401583
Root 74 : 8.560111953912077 Change is -0.000731947455825
Root 75 : 8.568779615006083 Change is -0.000627864740727
Root 76 : 8.604340504712928 Change is -0.000889536896610
Root 77 : 8.612780946474020 Change is -0.000785330449424
Root 78 : 8.634597934431255 Change is -0.001256525851750
Root 79 : 8.639862088111137 Change is -0.001019180474155
Root 80 : 8.669361834784052 Change is -0.000739226230889
Root 81 : 8.675481156203185 Change is -0.001312347762678
Root 82 : 8.677590432583161 Change is -0.000979669687384
Root 83 : 8.693884256562324 Change is -0.000714043801600
Root 84 : 8.709109125406247 Change is -0.000621270561581
Root 85 : 8.718845557875261 Change is -0.000536675023529
Root 86 : 8.741278830771906 Change is -0.000583291889176
Root 87 : 8.746627523679503 Change is -0.000800856546146
Root 88 : 8.762302177202303 Change is -0.000504645051122
Root 89 : 8.771257174570938 Change is -0.000711481905489
Root 90 : 8.777628485821053 Change is -0.001017096634376
Root 91 : 8.788037666595217 Change is -0.000521326581049
Root 92 : 8.796636287508599 Change is -0.000650030451295
Root 93 : 8.819479520030248 Change is -0.001073043141367
Root 94 : 8.832172521802599 Change is -0.000962931810544
Root 95 : 8.834332698006358 Change is -0.000517644334551
Root 96 : 8.844591879345778 Change is -0.000493668992203
Root 97 : 8.864459236898794 Change is -0.000836004490016
Root 98 : 8.867151831038647 Change is -0.001146575728300
Root 99 : 8.887969418444309 Change is -0.001185585288260
Root 100 : 8.900759890566883 Change is -0.001506790251506
Iteration 4 Dimension 998 NMult 800 NNew 198
CISAX will form 198 AO SS matrices at one time.
NMat= 198 NSing= 198 JSym2X= 0.
Root 1 has converged.
Root 2 has converged.
Root 3 has converged.
Root 4 has converged.
Root 5 has converged.
Root 6 has converged.
Root 7 has converged.
Root 8 has converged.
Root 9 has converged.
Root 10 has converged.
Root 11 has converged.
Root 12 has converged.
Root 13 has converged.
Root 14 has converged.
Root 15 has converged.
Root 16 has converged.
Root 17 has converged.
Root 18 has converged.
Root 19 has converged.
Root 20 has converged.
Root 21 has converged.
Root 22 has converged.
Root 23 has converged.
Root 24 has converged.
Root 25 has converged.
Root 26 has converged.
Root 27 has converged.
Root 28 has converged.
Root 29 has converged.
Root 30 has converged.
Root 31 has converged.
Root 32 has converged.
Root 33 has converged.
Root 34 has converged.
Root 35 has converged.
Root 36 has converged.
Root 37 has converged.
Root 38 has converged.
Root 39 has converged.
Root 40 has converged.
Root 41 not converged, maximum delta is 0.002207817172827
Root 42 not converged, maximum delta is 0.001423746294813
Root 43 has converged.
Root 44 has converged.
Root 45 has converged.
Root 46 has converged.
Root 47 has converged.
Root 48 has converged.
Root 49 has converged.
Root 50 has converged.
Root 51 has converged.
Root 52 has converged.
Root 53 not converged, maximum delta is 0.001005473157539
Root 54 has converged.
Root 55 has converged.
Root 56 has converged.
Root 57 has converged.
Root 58 has converged.
Root 59 has converged.
Root 60 has converged.
Root 61 has converged.
Root 62 has converged.
Root 63 has converged.
Root 64 has converged.
Root 65 has converged.
Root 66 has converged.
[truncated: 3,141 more rows]

## Sheet: 4-ls4
!====================================================================================!
! !
! LIST OF CONFORMERS (LIST FORM 4) !
! !
!------------------------------------------------------------------------------------!
! !
! DATE: 2020/05/19 TIME: 20:14:57.53 !
! OE9-6-8: !
! EMPIRICAL FORMULA: C15H26O3 MW = 254.188 !
! FORCE FIELD: MMFF94S(2010-12-04HG) !
! TOTAL NUMBER OF CONFORMERS FOUND: 444 !
! STERIC ENERGY: EMIN= 68.0934 EMAX= 88.3933 EAVE= 69.1017 !
! GIBB'S FREE ENERGY: GMIN= 284.2501 GMAX= 302.6470 GAVE= 285.1899 !
! MIXING ENERGIES: HMIX= 325.2666 TSMIX= 42.2418 GMIX= 283.0248 !
! MIXING HEAT CAPACITY: CPMIX= 77.4621 !
! TEMPERATURE: 25.00 CELSIUS ( 298.15 KELVIN) !
! !
!------------------------------------------------------------------------------------!
! !
! DEFINITIONS: !
! NO. = INDEX NUMBER IN THE ORDER OF THE TOTAL GIBBS'S FREE ENERGY !
! CONF. ID = IDENTIFICATION NUMBER OF EACH CONFORMER !
! HE = ENTHALPY CONTRIBUTION OF EACH CONFORMER (KCAL/MOL) !
! TSE = ENTROPY (MULRPLIED BY TEMP.) CONTRIBUTION OF EACH CONFORMER (KCAL/MOL)!
! GE = TOTAL GIBB'S FREE ENERGY OF EACH CONFORMER (KCAL/MOL) !
! DGE = RELATIVE GIBB'S FREE ENERGY OF EACH CONFORMER (KCAL/MOL) !
! GEPOP = DISTRIBUTION IN GIBB'S FREE ENERGY (%) !
! SE = STERIC ENERGY OF EACH CONFORMER (KCAL/MOL) !
! DSE = RELATIVE STERIC ENERGY FROM THE GLOBAL ENERGY MINIMUM (KCAL/MOL) !
! SEPOP = DISTRIBUTION BASED ON STERIC ENERGY (%) !
! CHIRAL = CHIRALITY EXISTANCE OF EACH CONFORMER !
! SYM. NUM. = SYMMETRY NUMBER OF EACH CONFORMER !
! POINT GROUP = POINT GROUP OF SYMMETRY OF EACH CONFORMER !
! INIT. = FLAG OF EACH CONFORMER THAT HAD USED FOR INITIAL STRUCTURE !
! REOPT. = FLAG OF EACH CONFORMER THAT HAD BEEN OPTIMIZED AGAIN !
! NO. NEG. = NUMBER OF NEGATIVE EIGEN VALUES OF EACH CONFORMER !
! !
!====================================================================================!
========================================================================================================================================
CONF. SYM. POINT NO.
NO. ID HE TSE GE DGE GPOP SE DSE EPOP CHIRAL NUM. GROUP INIT. REOPT. NEG.
----------------------------------------------------------------------------------------------------------------------------------------
1 00000095 324.1438 39.8936 284.2501 0.0000 12.6418 68.2792 0.1858 14.6853 T 1 C1 T F 0
2 00000089 324.0301 39.7279 284.3021 0.0520 11.5795 68.0934 0.0000 20.0936 T 1 C1 T F 0
3 00000102 324.9612 40.5222 284.4390 0.1889 9.1906 69.2663 1.1729 2.7755 T 1 C1 T F 0
4 00000096 324.8587 40.2192 284.6396 0.3894 6.5520 69.0786 0.9852 3.8095 T 1 C1 T F 0
5 00000010 324.6390 39.7055 284.9335 0.6834 3.9894 68.6946 0.6012 7.2842 T 1 C1 T F 0
6 00000143 325.7604 40.7451 285.0153 0.7652 3.4748 70.0098 1.9164 0.7913 T 1 C1 T F 0
7 00000015 324.5863 39.5555 285.0308 0.7807 3.3851 68.5712 0.4778 8.9708 T 1 C1 T F 0
8 00000097 325.7125 40.5171 285.1954 0.9453 2.5640 69.8848 1.7914 0.9772 T 1 C1 T F 0
9 00000094 325.2246 39.9236 285.3010 1.0508 2.1455 69.3366 1.2433 2.4646 T 1 C1 T F 0
10 00000107 325.9205 40.5897 285.3308 1.0807 2.0403 70.2003 2.1070 0.5737 T 1 C1 T F 0
11 00000063 325.3779 39.9974 285.3806 1.1304 1.8759 69.5088 1.4154 1.8431 T 1 C1 T F 0
12 00000115 325.4910 40.1033 285.3876 1.1375 1.8536 69.7205 1.6271 1.2894 T 1 C1 T F 0
13 00000108 325.2991 39.9072 285.3919 1.1418 1.8403 69.4432 1.3498 2.0588 T 1 C1 T F 0
14 00000071 325.5997 40.1746 285.4251 1.1749 1.7401 69.8072 1.7138 1.1139 T 1 C1 T F 0
15 00000106 325.4151 39.9003 285.5147 1.2646 1.4958 69.5598 1.4665 1.6910 T 1 C1 T F 0
16 00000001 325.8308 40.2325 285.5982 1.3481 1.2992 70.0203 1.9269 0.7773 T 1 C1 T F 0
17 00000004 325.6423 40.0267 285.6156 1.3655 1.2616 69.7391 1.6457 1.2495 T 1 C1 T F 0
18 00000024 325.2612 39.6121 285.6492 1.3990 1.1921 69.2758 1.1824 2.7313 T 1 C1 T F 0
19 00000093 325.5269 39.8690 285.6579 1.4078 1.1746 69.6045 1.5111 1.5682 T 1 C1 T F 0
20 00000114 325.8186 40.1186 285.7000 1.4499 1.0941 70.0526 1.9592 0.7361 T 1 C1 T F 0
21 00000049 325.9973 40.2608 285.7365 1.4863 1.0288 70.2133 2.1199 0.5613 T 1 C1 T F 0
22 00000050 325.7313 39.9572 285.7741 1.5239 0.9655 69.8266 1.7332 1.0780 T 1 C1 T F 0
23 00000014 325.5794 39.7998 285.7796 1.5294 0.9566 69.6812 1.5878 1.3778 T 1 C1 T F 0
24 00000006 326.1169 40.3274 285.7895 1.5394 0.9407 70.4029 2.3095 0.4076 T 1 C1 T F 0
25 00000081 326.0531 40.2389 285.8142 1.5641 0.9022 70.2343 2.1409 0.5417 T 1 C1 T F 0
26 00000008 325.9811 40.1647 285.8164 1.5662 0.8990 70.1956 2.1022 0.5783 T 1 C1 T F 0
27 00000064 325.8793 40.0565 285.8228 1.5726 0.8893 69.9884 1.8950 0.8203 T 1 C1 T F 0
28 00000083 326.0552 40.2033 285.8520 1.6018 0.8466 70.2506 2.1572 0.5270 T 1 C1 T F 0
29 00000074 325.9014 40.0375 285.8639 1.6138 0.8296 70.0226 1.9292 0.7743 T 1 C1 T F 0
30 00000007 326.0401 40.1550 285.8852 1.6350 0.8005 70.2163 2.1229 0.5584 T 1 C1 T F 0
31 00000101 325.9559 40.0694 285.8865 1.6364 0.7986 70.1202 2.0268 0.6567 T 1 C1 T F 0
32 00000131 326.0352 40.1355 285.8997 1.6496 0.7810 70.2269 2.1335 0.5485 T 1 C1 T F 0
33 00000051 325.9607 40.0164 285.9443 1.6942 0.7244 70.1028 2.0094 0.6763 T 1 C1 T F 0
34 00000016 325.7095 39.7349 285.9747 1.7245 0.6882 69.7404 1.6470 1.2467 T 1 C1 T F 0
35 00000052 326.0738 40.0383 286.0355 1.7853 0.6211 70.1782 2.0848 0.5955 T 1 C1 T F 0
36 00000028 326.4657 40.4020 286.0637 1.8136 0.5922 70.5617 2.4683 0.3117 T 1 C1 T F 0
37 00000080 326.5127 40.4050 286.1078 1.8576 0.5498 70.8379 2.7445 0.1956 T 1 C1 T F 0
38 00000124 326.5332 40.4118 286.1214 1.8712 0.5372 70.7250 2.6316 0.2367 T 1 C1 T F 0
39 00000032 325.9425 39.8075 286.1350 1.8848 0.5251 70.0015 1.9081 0.8024 T 1 C1 T F 0
40 00000009 326.2900 40.1220 286.1680 1.9179 0.4966 70.4705 2.3772 0.3636 T 1 C1 T F 0
41 00000082 326.3462 40.1755 286.1707 1.9206 0.4943 70.5226 2.4292 0.3330 T 1 C1 T F 0
42 00000072 326.4039 40.2050 286.1990 1.9488 0.4713 70.6477 2.5544 0.2696 T 1 C1 T F 0
43 00000180 326.4287 40.2053 286.2235 1.9733 0.4522 70.6425 2.5491 0.2720 T 1 C1 T F 0
44 00000073 326.2386 40.0150 286.2236 1.9735 0.4521 70.3451 2.2517 0.4493 T 1 C1 T F 0
45 00000120 326.3175 40.0821 286.2354 1.9853 0.4432 70.4408 2.3474 0.3823 T 1 C1 T F 0
46 00000157 326.3302 40.0328 286.2974 2.0473 0.3992 70.4666 2.3732 0.3660 T 1 C1 T F 0
47 00000029 326.6688 40.3551 286.3137 2.0636 0.3883 70.6965 2.6031 0.2483 T 1 C1 T F 0
48 00000116 326.6264 40.3115 286.3149 2.0647 0.3876 70.9141 2.8207 0.1720 T 1 C1 T F 0
49 00000070 326.5969 40.1941 286.4028 2.1527 0.3341 70.7756 2.6822 0.2173 T 1 C1 T F 0
50 00000110 326.5658 40.1601 286.4057 2.1555 0.3325 70.7811 2.6877 0.2153 T 1 C1 T F 0
51 00000109 326.1917 39.7733 286.4183 2.1682 0.3255 70.2760 2.1826 0.5049 T 1 C1 T F 0
52 00000088 326.3162 39.8919 286.4243 2.1741 0.3222 70.4190 2.3256 0.3966 T 1 C1 T F 0
53 00000126 326.5128 40.0821 286.4307 2.1806 0.3188 70.6998 2.6064 0.2469 T 1 C1 T F 0
54 00000062 326.6223 40.1552 286.4671 2.2169 0.2998 70.7502 2.6568 0.2268 T 1 C1 T F 0
55 00000011 326.4070 39.9269 286.4801 2.2300 0.2932 70.5636 2.4702 0.3107 T 1 C1 T F 0
56 00000021 326.9049 40.4178 286.4872 2.2370 0.2898 71.0613 2.9679 0.1341 T 1 C1 T F 0
57 00000005 326.7587 40.2687 286.4900 2.2399 0.2884 70.9197 2.8263 0.1703 T 1 C1 T F 0
58 00000026 326.2445 39.6483 286.5962 2.3460 0.2411 70.2519 2.1585 0.5258 T 1 C1 T F 0
59 00000018 326.4197 39.8048 286.6150 2.3648 0.2336 70.5009 2.4076 0.3454 T 1 C1 T F 0
60 00000103 326.7371 40.1083 286.6288 2.3786 0.2282 70.8415 2.7481 0.1944 T 1 C1 T F 0
61 00000117 326.7215 40.0814 286.6401 2.3899 0.2239 70.9047 2.8113 0.1747 T 1 C1 T F 0
62 00000087 326.9287 40.2739 286.6548 2.4047 0.2184 71.0727 2.9794 0.1316 T 1 C1 T F 0
63 00000065 326.5974 39.9210 286.6765 2.4263 0.2105 70.6327 2.5393 0.2765 T 1 C1 T F 0
64 00000121 326.8243 40.1216 286.7027 2.4526 0.2014 70.9575 2.8641 0.1598 T 1 C1 T F 0
65 00000167 326.8945 40.1906 286.7039 2.4537 0.2010 71.0817 2.9883 0.1296 T 1 C1 T F 0
66 00000187 326.9771 40.2606 286.7165 2.4663 0.1968 71.2203 3.1270 0.1026 T 1 C1 T F 0
67 00000019 327.0029 40.2612 286.7417 2.4916 0.1886 71.1505 3.0571 0.1154 T 1 C1 T F 0
68 00000123 326.9885 40.2154 286.7731 2.5229 0.1789 71.1529 3.0595 0.1149 T 1 C1 T F 0
69 00000020 327.0187 40.1912 286.8275 2.5773 0.1632 71.2069 3.1135 0.1049 T 1 C1 T F 0
70 00000027 326.9110 40.0398 286.8712 2.6211 0.1515 71.0241 2.9307 0.1428 T 1 C1 T F 0
71 00000246 327.3270 40.4020 286.9250 2.6748 0.1384 71.6167 3.5233 0.0525 T 1 C1 T F 0
72 00000127 327.1270 40.1454 286.9816 2.7315 0.1258 71.3119 3.2185 0.0879 T 1 C1 T F 0
73 00000144 327.3295 40.3273 287.0022 2.7521 0.1215 71.5923 3.4989 0.0547 T 1 C1 T F 0
74 00000166 327.2134 40.2056 287.0078 2.7577 0.1203 71.4058 3.3125 0.0750 T 1 C1 T F 0
75 00000069 327.1972 40.1559 287.0413 2.7912 0.1137 71.3541 3.2607 0.0818 T 1 C1 T F 0
76 00000245 327.5239 40.4041 287.1197 2.8696 0.0996 71.7843 3.6909 0.0396 T 1 C1 T F 0
77 00000179 327.5404 40.3862 287.1542 2.9041 0.0940 71.8205 3.7271 0.0372 T 1 C1 T F 0
78 00000208 327.3734 40.2005 287.1729 2.9228 0.0911 71.5210 3.4276 0.0617 T 1 C1 T F 0
79 00000139 327.3914 40.1584 287.2330 2.9829 0.0823 71.5235 3.4301 0.0615 T 1 C1 T F 0
80 00000122 327.3242 40.0791 287.2451 2.9949 0.0806 71.3963 3.3029 0.0762 T 1 C1 T F 0
81 00000263 327.9465 40.7011 287.2454 2.9952 0.0806 72.3090 4.2156 0.0163 T 1 C1 T F 0
82 00000221 327.4808 40.2349 287.2459 2.9957 0.0805 71.6687 3.5753 0.0481 T 1 C1 T F 0
83 00000017 327.0437 39.7849 287.2588 3.0086 0.0788 71.0661 2.9727 0.1331 T 1 C1 T F 0
84 00000184 327.6037 40.3149 287.2888 3.0386 0.0749 71.8602 3.7669 0.0348 T 1 C1 T F 0
85 00000025 326.9381 39.6303 287.3078 3.0576 0.0725 70.8876 2.7943 0.1798 T 1 C1 T F 0
86 00000060 327.9416 40.6116 287.3301 3.0799 0.0699 72.0091 3.9157 0.0271 T 1 C1 T F 0
87 00000185 327.4510 40.1207 287.3303 3.0802 0.0698 71.6047 3.5114 0.0536 T 1 C1 T F 0
88 00000285 327.7341 40.4029 287.3312 3.0811 0.0697 71.9711 3.8777 0.0289 T 1 C1 T F 0
89 00000316 328.0324 40.6446 287.3878 3.1377 0.0634 72.3390 4.2456 0.0155 T 1 C1 T F 0
90 00000079 327.7630 40.3667 287.3962 3.1461 0.0625 72.0101 3.9167 0.0270 T 1 C1 T F 0
91 00000061 327.5073 40.1100 287.3973 3.1472 0.0624 71.6260 3.5326 0.0517 T 1 C1 T F 0
92 00000134 327.5777 40.1746 287.4031 3.1530 0.0618 71.7183 3.6249 0.0443 T 1 C1 T F 0
93 00000183 327.3523 39.9380 287.4144 3.1642 0.0606 71.4786 3.3852 0.0663 T 1 C1 T F 0
94 00000059 327.5879 40.1549 287.4330 3.1829 0.0587 71.6889 3.5955 0.0465 T 1 C1 T F 0
95 00000133 327.7295 40.2227 287.5068 3.2567 0.0518 71.9435 3.8502 0.0303 T 1 C1 T F 0
96 00000220 327.7383 40.2254 287.5130 3.2628 0.0513 71.9185 3.8251 0.0316 T 1 C1 T F 0
97 00000172 327.8755 40.3607 287.5148 3.2647 0.0511 72.0969 4.0035 0.0234 T 1 C1 T F 0
98 00000056 327.3668 39.8315 287.5353 3.2852 0.0494 71.4284 3.3350 0.0722 T 1 C1 T F 0
99 00000086 327.9015 40.2820 287.6195 3.3694 0.0429 72.0290 3.9356 0.0262 T 1 C1 T F 0
100 00000193 327.9333 40.3048 287.6284 3.3783 0.0422 72.1035 4.0101 0.0231 T 1 C1 T F 0
101 00000057 328.0775 40.4123 287.6653 3.4151 0.0397 72.2054 4.1120 0.0195 T 1 C1 T F 0
102 00000257 328.0402 40.3696 287.6706 3.4204 0.0393 72.2409 4.1475 0.0183 T 1 C1 T F 0
103 00000058 327.8837 40.2083 287.6754 3.4252 0.0390 72.0409 3.9475 0.0257 T 1 C1 T F 0
104 00000162 328.0929 40.4117 287.6812 3.4311 0.0386 72.3941 4.3007 0.0141 T 1 C1 T F 0
105 00000255 328.0108 40.3237 287.6871 3.4370 0.0382 72.1610 4.0676 0.0210 T 1 C1 T F 0
106 00000207 327.8509 40.1508 287.7000 3.4499 0.0374 71.9675 3.8741 0.0291 T 1 C1 T F 0
107 00000242 328.1425 40.4396 287.7029 3.4527 0.0372 72.4163 4.3229 0.0136 T 1 C1 T F 0
108 00000218 328.0806 40.3560 287.7246 3.4745 0.0359 72.2537 4.1603 0.0179 T 1 C1 T F 0
109 00000163 328.1205 40.3143 287.8062 3.5560 0.0313 72.3538 4.2604 0.0151 T 1 C1 T F 0
110 00000190 328.1779 40.3410 287.8369 3.5868 0.0297 72.3921 4.2987 0.0142 T 1 C1 T F 0
111 00000252 328.2188 40.3596 287.8592 3.6090 0.0286 72.4568 4.3634 0.0127 T 1 C1 T F 0
112 00000036 328.0571 40.1625 287.8945 3.6444 0.0269 72.2057 4.1123 0.0194 T 1 C1 T F 0
113 00000173 328.4135 40.4970 287.9165 3.6663 0.0260 72.6273 4.5339 0.0095 T 1 C1 T F 0
114 00000232 328.2812 40.3462 287.9350 3.6849 0.0252 72.4821 4.3887 0.0122 T 1 C1 T F 0
115 00000038 327.9422 39.9966 287.9457 3.6955 0.0247 72.1397 4.0463 0.0217 T 1 C1 T F 0
116 00000034 327.7048 39.7486 287.9562 3.7060 0.0243 71.7223 3.6290 0.0440 T 1 C1 T F 0
117 00000195 328.3572 40.3959 287.9612 3.7111 0.0241 72.6095 4.5161 0.0098 T 1 C1 T F 0
118 00000321 328.4880 40.4530 288.0350 3.7849 0.0213 72.7187 4.6253 0.0082 T 1 C1 T F 0
119 00000219 328.5682 40.5070 288.0612 3.8110 0.0203 72.7290 4.6357 0.0080 T 1 C1 T F 0
120 00000035 328.3167 40.2263 288.0904 3.8403 0.0194 72.4062 4.3128 0.0139 T 1 C1 T F 0
121 00000138 328.1364 40.0331 288.1033 3.8531 0.0189 72.1813 4.0879 0.0203 T 1 C1 T F 0
122 00000295 328.4946 40.3808 288.1138 3.8637 0.0186 72.7081 4.6147 0.0083 T 1 C1 T F 0
123 00000037 328.2316 40.1007 288.1309 3.8807 0.0181 72.3162 4.2228 0.0161 T 1 C1 T F 0
124 00000045 328.4815 40.3491 288.1324 3.8822 0.0180 72.7212 4.6278 0.0081 T 1 C1 T F 0
125 00000003 328.3675 40.1926 288.1750 3.9248 0.0168 72.6536 4.5602 0.0091 T 1 C1 T F 0
126 00000055 328.0460 39.8087 288.2372 3.9871 0.0151 72.0407 3.9473 0.0257 T 1 C1 T F 0
127 00000307 328.5977 40.3522 288.2454 3.9953 0.0149 72.7520 4.6586 0.0077 T 1 C1 T F 0
128 00000043 328.2049 39.9421 288.2627 4.0126 0.0145 72.3114 4.2180 0.0163 T 1 C1 T F 0
129 00000152 328.6210 40.3513 288.2697 4.0195 0.0143 72.8138 4.7204 0.0070 T 1 C1 T F 0
130 00000217 328.4780 40.2039 288.2741 4.0239 0.0142 72.5593 4.4659 0.0107 T 1 C1 T F 0
131 00000254 329.1414 40.8102 288.3312 4.0811 0.0129 73.2657 5.1723 0.0032 T 1 C1 T F 0
132 00000154 328.5104 40.1595 288.3509 4.1008 0.0125 72.7374 4.6440 0.0079 T 1 C1 T F 0
133 00000262 329.2667 40.9156 288.3511 4.1009 0.0125 73.5639 5.4706 0.0020 T 1 C1 T F 0
134 00000171 328.6126 40.2594 288.3532 4.1031 0.0124 72.7417 4.6483 0.0079 T 1 C1 T F 0
135 00000033 328.0520 39.6746 288.3774 4.1272 0.0119 72.0059 3.9125 0.0272 T 1 C1 T F 0
136 00000313 329.0254 40.6193 288.4061 4.1560 0.0114 73.3333 5.2399 0.0029 T 1 C1 T F 0
137 00000150 328.4298 39.9511 288.4787 4.2285 0.0101 72.4980 4.4046 0.0119 T 1 C1 T F 0
138 00000044 328.7619 40.2807 288.4812 4.2310 0.0100 72.9321 4.8387 0.0057 T 1 C1 T F 0
139 00000374 329.1734 40.6656 288.5078 4.2576 0.0096 73.4429 5.3495 0.0024 T 1 C1 T F 0
140 00000078 329.2884 40.7655 288.5229 4.2727 0.0093 73.4779 5.3845 0.0023 T 1 C1 T F 0
141 00000198 329.2657 40.7302 288.5355 4.2853 0.0091 73.4339 5.3405 0.0024 T 1 C1 T F 0
142 00000042 328.4500 39.8669 288.5831 4.3330 0.0084 72.4921 4.3987 0.0120 T 1 C1 T F 0
143 00000132 328.4759 39.8307 288.6452 4.3950 0.0076 72.5473 4.4539 0.0109 T 1 C1 T F 0
144 00000225 329.4127 40.7311 288.6816 4.4315 0.0071 73.5870 5.4936 0.0019 T 1 C1 T F 0
145 00000153 328.8906 40.1874 288.7031 4.4530 0.0069 73.0075 4.9141 0.0050 T 1 C1 T F 0
146 00000046 328.9999 40.2778 288.7221 4.4720 0.0067 73.1754 5.0820 0.0038 T 1 C1 T F 0
147 00000151 329.1155 40.3543 288.7611 4.5110 0.0062 73.2480 5.1546 0.0033 T 1 C1 T F 0
148 00000189 329.4132 40.6506 288.7626 4.5125 0.0062 73.5444 5.4510 0.0020 T 1 C1 T F 0
149 00000231 329.8215 41.0061 288.8154 4.5652 0.0057 73.9982 5.9048 0.0009 T 1 C1 T F 0
150 00000149 328.7263 39.8748 288.8515 4.6013 0.0054 72.7246 4.6312 0.0081 T 1 C1 T F 0
151 00000161 329.0088 40.0221 288.9867 4.7365 0.0043 73.1627 5.0693 0.0039 T 1 C1 T F 0
152 00000291 329.8544 40.8238 289.0306 4.7805 0.0040 74.0659 5.9725 0.0008 T 1 C1 T F 0
153 00000196 329.9657 40.8981 289.0676 4.8175 0.0037 74.1143 6.0209 0.0008 T 1 C1 T F 0
154 00000323 329.9752 40.7556 289.2196 4.9695 0.0029 74.0777 5.9843 0.0008 T 1 C1 T F 0
155 00000228 329.6068 40.3567 289.2501 4.9999 0.0027 73.6725 5.5791 0.0016 T 1 C1 T F 0
156 00000212 329.9149 40.6584 289.2565 5.0064 0.0027 74.1539 6.0605 0.0007 T 1 C1 T F 0
157 00000194 329.2752 40.0036 289.2716 5.0214 0.0026 73.3794 5.2860 0.0027 T 1 C1 T F 0
158 00000266 329.9158 40.5613 289.3545 5.1044 0.0023 73.9833 5.8899 0.0010 T 1 C1 T F 0
159 00000312 330.3747 41.0119 289.3628 5.1127 0.0023 74.6386 6.5452 0.0003 T 1 C1 T F 0
160 00000287 330.2229 40.7571 289.4659 5.2157 0.0019 74.3510 6.2576 0.0005 T 1 C1 T F 0
161 00000279 330.1853 40.6783 289.5070 5.2569 0.0018 74.2927 6.1993 0.0006 T 1 C1 T F 0
162 00000002 331.0026 41.3231 289.6795 5.4293 0.0013 75.1614 7.0680 0.0001 T 1 C1 T F 0
163 00000099 331.9631 40.0104 291.9527 7.7025 0.0000 76.0927 7.9993 0.0000 T 1 C1 T F 0
164 00000135 332.1144 40.1299 291.9845 7.7343 0.0000 76.3924 8.2990 0.0000 T 1 C1 T F 0
165 00000104 332.3181 40.2688 292.0494 7.7992 0.0000 76.5275 8.4341 0.0000 T 1 C1 T F 0
166 00000105 332.4304 40.3705 292.0598 7.8097 0.0000 76.6384 8.5450 0.0000 T 1 C1 T F 0
167 00000039 332.1762 39.9232 292.2529 8.0028 0.0000 76.3342 8.2408 0.0000 T 1 C1 T F 0
168 00000112 332.7310 40.4332 292.2978 8.0477 0.0000 76.9906 8.8973 0.0000 T 1 C1 T F 0
169 00000098 332.4263 40.1195 292.3068 8.0566 0.0000 76.6259 8.5325 0.0000 T 1 C1 T F 0
170 00000118 333.0798 40.7539 292.3259 8.0758 0.0000 77.4213 9.3279 0.0000 T 1 C1 T F 0
171 00000125 332.7152 40.2810 292.4342 8.1841 0.0000 76.9316 8.8382 0.0000 T 1 C1 T F 0
172 00000111 333.0406 40.5899 292.4507 8.2005 0.0000 77.3707 9.2773 0.0000 T 1 C1 T F 0
173 00000164 332.7285 40.2702 292.4582 8.2081 0.0000 77.0295 8.9361 0.0000 T 1 C1 T F 0
174 00000156 333.5703 41.0801 292.4902 8.2401 0.0000 77.8810 9.7876 0.0000 T 1 C1 T F 0
175 00000031 332.3127 39.7747 292.5379 8.2878 0.0000 76.3347 8.2413 0.0000 T 1 C1 T F 0
176 00000047 332.6308 40.0528 292.5780 8.3279 0.0000 76.8105 8.7171 0.0000 T 1 C1 T F 0
177 00000119 332.8109 40.2326 292.5783 8.3282 0.0000 77.0433 8.9499 0.0000 T 1 C1 T F 0
178 00000140 332.7898 40.1634 292.6264 8.3762 0.0000 77.0160 8.9226 0.0000 T 1 C1 T F 0
179 00000136 332.7342 40.0881 292.6461 8.3959 0.0000 76.9544 8.8610 0.0000 T 1 C1 T F 0
180 00000022 332.6357 39.9666 292.6691 8.4190 0.0000 76.7239 8.6305 0.0000 T 1 C1 T F 0
181 00000186 332.8389 40.1423 292.6966 8.4464 0.0000 77.0693 8.9759 0.0000 T 1 C1 T F 0
182 00000416 332.8821 40.1152 292.7669 8.5168 0.0000 76.9938 8.9004 0.0000 T 1 C1 T F 0
183 00000040 332.6594 39.8883 292.7711 8.5210 0.0000 76.7624 8.6690 0.0000 T 1 C1 T F 0
184 00000155 333.8829 41.0444 292.8385 8.5883 0.0000 78.1955 10.1021 0.0000 T 1 C1 T F 0
185 00000030 332.7268 39.8704 292.8564 8.6063 0.0000 76.8150 8.7216 0.0000 T 1 C1 T F 0
186 00000054 333.3711 40.4483 292.9228 8.6727 0.0000 77.5514 9.4580 0.0000 T 1 C1 T F 0
187 00000253 333.6557 40.7240 292.9317 8.6816 0.0000 77.9508 9.8574 0.0000 T 1 C1 T F 0
188 00000147 333.6561 40.7228 292.9333 8.6831 0.0000 77.8785 9.7851 0.0000 T 1 C1 T F 0
189 00000129 333.0178 40.0529 292.9649 8.7148 0.0000 77.2075 9.1141 0.0000 T 1 C1 T F 0
190 00000174 333.2865 40.3015 292.9850 8.7349 0.0000 77.5342 9.4408 0.0000 T 1 C1 T F 0
191 00000349 333.0723 40.0430 293.0292 8.7791 0.0000 77.1877 9.0943 0.0000 T 1 C1 T F 0
192 00000076 333.3460 40.3049 293.0412 8.7910 0.0000 77.5447 9.4513 0.0000 T 1 C1 T F 0
193 00000141 333.2143 40.1252 293.0891 8.8390 0.0000 77.3827 9.2893 0.0000 T 1 C1 T F 0
194 00000146 333.8048 40.7097 293.0951 8.8450 0.0000 78.0850 9.9916 0.0000 T 1 C1 T F 0
195 00000012 333.8161 40.7121 293.1039 8.8538 0.0000 78.0869 9.9935 0.0000 T 1 C1 T F 0
196 00000053 333.8272 40.6440 293.1831 8.9330 0.0000 78.0933 9.9999 0.0000 T 1 C1 T F 0
197 00000145 333.4911 40.2935 293.1976 8.9475 0.0000 77.7650 9.6716 0.0000 T 1 C1 T F 0
198 00000084 333.7947 40.5848 293.2099 8.9598 0.0000 78.0797 9.9863 0.0000 T 1 C1 T F 0
199 00000275 333.7958 40.5503 293.2454 8.9953 0.0000 78.0420 9.9486 0.0000 T 1 C1 T F 0
200 00000085 333.9750 40.7277 293.2474 8.9972 0.0000 78.2633 10.1699 0.0000 T 1 C1 T F 0
201 00000256 333.7968 40.4815 293.3154 9.0652 0.0000 78.0201 9.9267 0.0000 T 1 C1 T F 0
202 00000192 333.9539 40.5986 293.3553 9.1052 0.0000 78.1898 10.0964 0.0000 T 1 C1 T F 0
203 00000227 333.9933 40.6185 293.3748 9.1247 0.0000 78.2459 10.1526 0.0000 T 1 C1 T F 0
204 00000075 333.8073 40.4126 293.3946 9.1445 0.0000 78.0764 9.9831 0.0000 T 1 C1 T F 0
205 00000128 333.5541 40.1569 293.3973 9.1471 0.0000 77.8104 9.7170 0.0000 T 1 C1 T F 0
206 00000191 334.1794 40.7785 293.4009 9.1508 0.0000 78.4424 10.3490 0.0000 T 1 C1 T F 0
207 00000066 333.8727 40.4572 293.4155 9.1654 0.0000 78.0948 10.0014 0.0000 T 1 C1 T F 0
208 00000091 333.7282 40.3125 293.4157 9.1656 0.0000 77.9067 9.8133 0.0000 T 1 C1 T F 0
209 00000067 333.7738 40.3454 293.4284 9.1783 0.0000 77.9361 9.8427 0.0000 T 1 C1 T F 0
210 00000200 334.0313 40.5920 293.4393 9.1892 0.0000 78.2862 10.1928 0.0000 T 1 C1 T F 0
211 00000182 334.1673 40.6651 293.5022 9.2521 0.0000 78.4567 10.3633 0.0000 T 1 C1 T F 0
212 00000265 334.1126 40.6087 293.5039 9.2537 0.0000 78.4618 10.3684 0.0000 T 1 C1 T F 0
213 00000159 333.8756 40.3638 293.5118 9.2617 0.0000 78.0659 9.9726 0.0000 T 1 C1 T F 0
214 00000199 334.2160 40.6733 293.5427 9.2926 0.0000 78.4936 10.4002 0.0000 T 1 C1 T F 0
215 00000417 333.8431 40.3003 293.5428 9.2927 0.0000 78.0779 9.9845 0.0000 T 1 C1 T F 0
216 00000169 333.8212 40.2747 293.5465 9.2963 0.0000 77.9968 9.9035 0.0000 T 1 C1 T F 0
217 00000197 334.1547 40.5862 293.5684 9.3183 0.0000 78.4134 10.3200 0.0000 T 1 C1 T F 0
218 00000181 334.0841 40.5117 293.5724 9.3223 0.0000 78.3374 10.2440 0.0000 T 1 C1 T F 0
219 00000258 334.1829 40.6080 293.5749 9.3248 0.0000 78.4779 10.3845 0.0000 T 1 C1 T F 0
220 00000176 333.8769 40.2854 293.5916 9.3414 0.0000 78.0936 10.0002 0.0000 T 1 C1 T F 0
221 00000415 333.8988 40.2783 293.6205 9.3704 0.0000 78.0198 9.9264 0.0000 T 1 C1 T F 0
222 00000264 334.6392 41.0009 293.6382 9.3881 0.0000 79.0527 10.9593 0.0000 T 1 C1 T F 0
223 00000317 334.1559 40.5106 293.6453 9.3952 0.0000 78.4999 10.4065 0.0000 T 1 C1 T F 0
224 00000290 334.1768 40.4969 293.6799 9.4298 0.0000 78.4334 10.3400 0.0000 T 1 C1 T F 0
225 00000090 334.1252 40.4438 293.6814 9.4313 0.0000 78.3666 10.2732 0.0000 T 1 C1 T F 0
226 00000226 334.2033 40.5216 293.6817 9.4316 0.0000 78.4572 10.3638 0.0000 T 1 C1 T F 0
227 00000177 333.8952 40.2125 293.6828 9.4326 0.0000 78.0524 9.9590 0.0000 T 1 C1 T F 0
228 00000303 334.2226 40.5345 293.6881 9.4380 0.0000 78.5513 10.4579 0.0000 T 1 C1 T F 0
229 00000331 334.3545 40.6644 293.6901 9.4400 0.0000 78.7543 10.6609 0.0000 T 1 C1 T F 0
230 00000168 334.1009 40.3859 293.7150 9.4648 0.0000 78.3454 10.2520 0.0000 T 1 C1 T F 0
231 00000158 334.2045 40.4671 293.7374 9.4873 0.0000 78.4621 10.3688 0.0000 T 1 C1 T F 0
232 00000286 334.3501 40.6092 293.7409 9.4908 0.0000 78.6491 10.5557 0.0000 T 1 C1 T F 0
233 00000248 334.3681 40.5936 293.7745 9.5244 0.0000 78.6877 10.5943 0.0000 T 1 C1 T F 0
234 00000284 334.7751 40.9331 293.8420 9.5918 0.0000 79.0402 10.9468 0.0000 T 1 C1 T F 0
235 00000210 334.1555 40.3112 293.8444 9.5942 0.0000 78.3251 10.2317 0.0000 T 1 C1 T F 0
236 00000247 334.5601 40.7081 293.8519 9.6018 0.0000 78.9459 10.8525 0.0000 T 1 C1 T F 0
237 00000272 334.5955 40.7162 293.8793 9.6291 0.0000 78.8890 10.7956 0.0000 T 1 C1 T F 0
238 00000325 334.2394 40.3331 293.9063 9.6561 0.0000 78.5021 10.4087 0.0000 T 1 C1 T F 0
239 00000215 334.1171 40.1893 293.9278 9.6777 0.0000 78.3038 10.2104 0.0000 T 1 C1 T F 0
240 00000205 333.9730 40.0321 293.9409 9.6907 0.0000 78.1155 10.0222 0.0000 T 1 C1 T F 0
241 00000233 334.5121 40.5709 293.9412 9.6911 0.0000 78.7593 10.6659 0.0000 T 1 C1 T F 0
242 00000281 334.5975 40.6400 293.9575 9.7074 0.0000 78.8113 10.7179 0.0000 T 1 C1 T F 0
243 00000223 334.2813 40.3074 293.9740 9.7238 0.0000 78.4550 10.3616 0.0000 T 1 C1 T F 0
244 00000234 334.6996 40.6962 294.0034 9.7533 0.0000 78.9430 10.8496 0.0000 T 1 C1 T F 0
245 00000214 334.4316 40.4259 294.0058 9.7556 0.0000 78.7042 10.6108 0.0000 T 1 C1 T F 0
246 00000213 334.7646 40.7475 294.0171 9.7670 0.0000 79.0837 10.9903 0.0000 T 1 C1 T F 0
247 00000324 334.4385 40.4076 294.0310 9.7808 0.0000 78.6380 10.5446 0.0000 T 1 C1 T F 0
248 00000260 334.4958 40.4556 294.0402 9.7901 0.0000 78.7711 10.6777 0.0000 T 1 C1 T F 0
249 00000309 334.4899 40.4352 294.0547 9.8045 0.0000 78.7629 10.6695 0.0000 T 1 C1 T F 0
250 00000274 334.6746 40.6050 294.0695 9.8194 0.0000 79.0010 10.9076 0.0000 T 1 C1 T F 0
251 00000318 334.4782 40.4072 294.0710 9.8209 0.0000 78.7209 10.6275 0.0000 T 1 C1 T F 0
252 00000243 334.6428 40.5624 294.0803 9.8302 0.0000 78.8967 10.8033 0.0000 T 1 C1 T F 0
253 00000244 334.7521 40.6582 294.0939 9.8438 0.0000 79.0224 10.9291 0.0000 T 1 C1 T F 0
254 00000273 334.8018 40.6956 294.1062 9.8560 0.0000 79.1552 11.0618 0.0000 T 1 C1 T F 0
255 00000299 334.5644 40.4529 294.1114 9.8613 0.0000 78.8655 10.7721 0.0000 T 1 C1 T F 0
256 00000268 334.6237 40.5114 294.1123 9.8622 0.0000 78.7891 10.6957 0.0000 T 1 C1 T F 0
257 00000250 335.1516 41.0294 294.1222 9.8721 0.0000 79.2836 11.1902 0.0000 T 1 C1 T F 0
258 00000302 334.5358 40.3891 294.1467 9.8965 0.0000 78.7052 10.6118 0.0000 T 1 C1 T F 0
259 00000230 334.3578 40.2060 294.1518 9.9016 0.0000 78.5098 10.4165 0.0000 T 1 C1 T F 0
260 00000334 334.7978 40.6451 294.1527 9.9025 0.0000 79.1471 11.0537 0.0000 T 1 C1 T F 0
261 00000280 334.9404 40.7809 294.1594 9.9093 0.0000 79.1727 11.0793 0.0000 T 1 C1 T F 0
262 00000236 334.4668 40.3064 294.1604 9.9103 0.0000 78.5970 10.5036 0.0000 T 1 C1 T F 0
263 00000209 334.5963 40.4236 294.1727 9.9226 0.0000 78.8313 10.7379 0.0000 T 1 C1 T F 0
264 00000367 335.0494 40.8702 294.1792 9.9290 0.0000 79.4874 11.3940 0.0000 T 1 C1 T F 0
265 00000267 334.8596 40.6561 294.2036 9.9534 0.0000 79.0386 10.9452 0.0000 T 1 C1 T F 0
266 00000202 334.1798 39.9698 294.2100 9.9599 0.0000 78.2602 10.1668 0.0000 T 1 C1 T F 0
267 00000239 334.6240 40.4021 294.2219 9.9718 0.0000 78.7816 10.6882 0.0000 T 1 C1 T F 0
268 00000238 334.4793 40.2360 294.2433 9.9931 0.0000 78.6953 10.6019 0.0000 T 1 C1 T F 0
269 00000229 334.5332 40.2648 294.2684 10.0182 0.0000 78.7008 10.6074 0.0000 T 1 C1 T F 0
270 00000240 334.5815 40.3064 294.2751 10.0249 0.0000 78.6711 10.5777 0.0000 T 1 C1 T F 0
271 00000293 334.8386 40.5581 294.2805 10.0303 0.0000 79.0815 10.9881 0.0000 T 1 C1 T F 0
272 00000340 334.7628 40.4811 294.2817 10.0316 0.0000 79.1156 11.0222 0.0000 T 1 C1 T F 0
273 00000259 334.8456 40.5365 294.3091 10.0590 0.0000 79.1846 11.0912 0.0000 T 1 C1 T F 0
274 00000222 334.7375 40.4227 294.3147 10.0646 0.0000 78.9804 10.8871 0.0000 T 1 C1 T F 0
275 00000204 334.4548 40.1106 294.3443 10.0941 0.0000 78.6616 10.5682 0.0000 T 1 C1 T F 0
276 00000235 334.6403 40.2931 294.3472 10.0970 0.0000 78.8315 10.7381 0.0000 T 1 C1 T F 0
277 00000336 334.8866 40.5212 294.3654 10.1152 0.0000 79.2145 11.1212 0.0000 T 1 C1 T F 0
278 00000304 334.8409 40.4742 294.3667 10.1165 0.0000 79.1089 11.0155 0.0000 T 1 C1 T F 0
279 00000306 334.4896 40.1190 294.3706 10.1204 0.0000 78.6510 10.5576 0.0000 T 1 C1 T F 0
280 00000308 334.9781 40.6008 294.3773 10.1272 0.0000 79.2280 11.1346 0.0000 T 1 C1 T F 0
281 00000315 335.1339 40.7476 294.3863 10.1362 0.0000 79.4733 11.3799 0.0000 T 1 C1 T F 0
282 00000332 335.0603 40.6451 294.4152 10.1650 0.0000 79.4078 11.3144 0.0000 T 1 C1 T F 0
283 00000201 334.5116 40.0744 294.4371 10.1870 0.0000 78.6682 10.5748 0.0000 T 1 C1 T F 0
284 00000355 334.9282 40.4843 294.4439 10.1938 0.0000 79.1730 11.0796 0.0000 T 1 C1 T F 0
285 00000337 335.0038 40.5463 294.4574 10.2073 0.0000 79.3150 11.2216 0.0000 T 1 C1 T F 0
286 00000322 335.0339 40.5763 294.4576 10.2074 0.0000 79.3104 11.2170 0.0000 T 1 C1 T F 0
287 00000294 334.9511 40.4727 294.4784 10.2282 0.0000 79.2639 11.1705 0.0000 T 1 C1 T F 0
288 00000385 335.2094 40.6838 294.5256 10.2755 0.0000 79.5565 11.4631 0.0000 T 1 C1 T F 0
289 00000356 335.1231 40.5910 294.5321 10.2820 0.0000 79.4252 11.3318 0.0000 T 1 C1 T F 0
290 00000300 334.9644 40.4238 294.5406 10.2905 0.0000 79.2093 11.1159 0.0000 T 1 C1 T F 0
291 00000277 334.8700 40.3279 294.5421 10.2920 0.0000 79.0200 10.9266 0.0000 T 1 C1 T F 0
292 00000364 334.9945 40.4408 294.5537 10.3036 0.0000 79.2720 11.1786 0.0000 T 1 C1 T F 0
293 00000350 335.1725 40.6087 294.5637 10.3136 0.0000 79.5007 11.4073 0.0000 T 1 C1 T F 0
294 00000292 335.1655 40.6011 294.5644 10.3142 0.0000 79.4001 11.3067 0.0000 T 1 C1 T F 0
295 00000310 335.0454 40.4158 294.6296 10.3794 0.0000 79.2649 11.1715 0.0000 T 1 C1 T F 0
296 00000352 335.2222 40.5860 294.6361 10.3860 0.0000 79.4832 11.3898 0.0000 T 1 C1 T F 0
297 00000361 334.9956 40.3374 294.6582 10.4080 0.0000 79.1679 11.0745 0.0000 T 1 C1 T F 0
298 00000379 335.2965 40.6284 294.6681 10.4180 0.0000 79.6755 11.5822 0.0000 T 1 C1 T F 0
299 00000343 335.1333 40.4587 294.6747 10.4245 0.0000 79.3873 11.2939 0.0000 T 1 C1 T F 0
300 00000297 335.1598 40.4831 294.6768 10.4266 0.0000 79.4134 11.3200 0.0000 T 1 C1 T F 0
301 00000276 335.1069 40.4252 294.6817 10.4315 0.0000 79.3229 11.2295 0.0000 T 1 C1 T F 0
302 00000375 335.1726 40.4872 294.6854 10.4352 0.0000 79.4804 11.3870 0.0000 T 1 C1 T F 0
303 00000314 335.5426 40.8349 294.7077 10.4576 0.0000 79.8908 11.7974 0.0000 T 1 C1 T F 0
304 00000328 334.7683 40.0311 294.7373 10.4871 0.0000 78.9402 10.8468 0.0000 T 1 C1 T F 0
305 00000397 335.5082 40.7701 294.7381 10.4879 0.0000 79.8833 11.7899 0.0000 T 1 C1 T F 0
306 00000326 335.1290 40.3428 294.7862 10.5361 0.0000 79.3452 11.2519 0.0000 T 1 C1 T F 0
307 00000383 335.4908 40.6859 294.8049 10.5548 0.0000 79.8270 11.7336 0.0000 T 1 C1 T F 0
308 00000341 335.3002 40.4666 294.8336 10.5835 0.0000 79.6009 11.5075 0.0000 T 1 C1 T F 0
309 00000377 335.4370 40.5884 294.8486 10.5985 0.0000 79.7266 11.6332 0.0000 T 1 C1 T F 0
310 00000319 335.2507 40.3955 294.8552 10.6050 0.0000 79.4494 11.3560 0.0000 T 1 C1 T F 0
311 00000296 335.4817 40.6197 294.8621 10.6119 0.0000 79.8118 11.7184 0.0000 T 1 C1 T F 0
312 00000358 335.1404 40.2475 294.8929 10.6428 0.0000 79.4641 11.3707 0.0000 T 1 C1 T F 0
313 00000371 335.1158 40.1905 294.9254 10.6752 0.0000 79.3269 11.2335 0.0000 T 1 C1 T F 0
314 00000338 335.4204 40.4924 294.9280 10.6779 0.0000 79.6735 11.5801 0.0000 T 1 C1 T F 0
315 00000283 335.1074 40.0973 295.0101 10.7600 0.0000 79.1701 11.0767 0.0000 T 1 C1 T F 0
316 00000386 335.6504 40.5949 295.0555 10.8053 0.0000 79.9281 11.8347 0.0000 T 1 C1 T F 0
317 00000100 334.7201 39.6625 295.0577 10.8075 0.0000 78.8837 10.7903 0.0000 T 1 C1 T F 0
318 00000270 335.0083 39.9444 295.0640 10.8138 0.0000 79.0025 10.9091 0.0000 T 1 C1 T F 0
319 00000400 335.6513 40.5809 295.0704 10.8203 0.0000 79.9571 11.8637 0.0000 T 1 C1 T F 0
320 00000344 335.5619 40.4185 295.1434 10.8932 0.0000 79.7636 11.6702 0.0000 T 1 C1 T F 0
321 00000393 335.8667 40.7215 295.1452 10.8950 0.0000 80.1570 12.0636 0.0000 T 1 C1 T F 0
322 00000353 335.6897 40.5273 295.1624 10.9122 0.0000 79.9011 11.8077 0.0000 T 1 C1 T F 0
323 00000282 335.3688 40.1870 295.1818 10.9317 0.0000 79.4403 11.3469 0.0000 T 1 C1 T F 0
324 00000369 335.4032 40.1785 295.2247 10.9746 0.0000 79.5971 11.5037 0.0000 T 1 C1 T F 0
325 00000365 335.6472 40.4172 295.2300 10.9799 0.0000 79.8697 11.7763 0.0000 T 1 C1 T F 0
326 00000346 335.2105 39.9636 295.2470 10.9968 0.0000 79.2960 11.2026 0.0000 T 1 C1 T F 0
327 00000289 335.3001 40.0273 295.2728 11.0226 0.0000 79.3665 11.2731 0.0000 T 1 C1 T F 0
328 00000381 336.1132 40.8194 295.2938 11.0436 0.0000 80.2843 12.1909 0.0000 T 1 C1 T F 0
329 00000409 336.1976 40.9029 295.2947 11.0446 0.0000 80.5967 12.5033 0.0000 T 1 C1 T F 0
330 00000329 335.3176 40.0113 295.3063 11.0562 0.0000 79.4279 11.3345 0.0000 T 1 C1 T F 0
331 00000402 335.8490 40.5259 295.3231 11.0729 0.0000 80.0488 11.9554 0.0000 T 1 C1 T F 0
332 00000395 335.7721 40.4069 295.3652 11.1150 0.0000 80.1297 12.0363 0.0000 T 1 C1 T F 0
333 00000269 335.4033 40.0335 295.3698 11.1197 0.0000 79.4617 11.3683 0.0000 T 1 C1 T F 0
334 00000398 336.0889 40.6656 295.4233 11.1731 0.0000 80.3957 12.3023 0.0000 T 1 C1 T F 0
335 00000359 335.7112 40.2372 295.4740 11.2238 0.0000 79.9879 11.8945 0.0000 T 1 C1 T F 0
336 00000362 335.8246 40.3338 295.4908 11.2406 0.0000 79.9433 11.8500 0.0000 T 1 C1 T F 0
337 00000404 336.2067 40.6823 295.5244 11.2743 0.0000 80.4485 12.3551 0.0000 T 1 C1 T F 0
338 00000372 335.8347 40.2712 295.5635 11.3133 0.0000 79.9982 11.9048 0.0000 T 1 C1 T F 0
339 00000113 335.3528 39.7837 295.5691 11.3190 0.0000 79.6167 11.5233 0.0000 T 1 C1 T F 0
340 00000388 335.7567 40.1021 295.6546 11.4045 0.0000 79.8672 11.7738 0.0000 T 1 C1 T F 0
341 00000023 335.0329 39.3582 295.6748 11.4246 0.0000 79.1593 11.0659 0.0000 T 1 C1 T F 0
342 00000407 336.0895 40.4142 295.6753 11.4252 0.0000 80.3427 12.2493 0.0000 T 1 C1 T F 0
343 00000347 335.7290 39.9264 295.8026 11.5524 0.0000 79.7604 11.6670 0.0000 T 1 C1 T F 0
344 00000165 335.6195 39.7578 295.8617 11.6116 0.0000 79.9120 11.8186 0.0000 T 1 C1 T F 0
345 00000175 335.7229 39.8086 295.9143 11.6642 0.0000 79.9683 11.8749 0.0000 T 1 C1 T F 0
346 00000148 336.0040 40.0642 295.9398 11.6897 0.0000 80.2772 12.1838 0.0000 T 1 C1 T F 0
347 00000390 336.0480 40.0936 295.9543 11.7042 0.0000 80.2428 12.1494 0.0000 T 1 C1 T F 0
348 00000130 336.0024 39.8632 296.1392 11.8891 0.0000 80.2474 12.1540 0.0000 T 1 C1 T F 0
349 00000421 335.8496 39.6633 296.1863 11.9362 0.0000 80.1352 12.0418 0.0000 T 1 C1 T F 0
350 00000048 335.6238 39.4315 296.1922 11.9421 0.0000 79.8161 11.7227 0.0000 T 1 C1 T F 0
351 00000077 336.0743 39.8814 296.1929 11.9428 0.0000 80.3070 12.2136 0.0000 T 1 C1 T F 0
352 00000424 335.9805 39.7287 296.2518 12.0017 0.0000 80.2183 12.1249 0.0000 T 1 C1 T F 0
353 00000425 336.5890 40.3340 296.2550 12.0049 0.0000 80.9598 12.8664 0.0000 T 1 C1 T F 0
354 00000391 336.3881 40.0833 296.3048 12.0546 0.0000 80.5344 12.4410 0.0000 T 1 C1 T F 0
355 00000068 336.0286 39.6867 296.3419 12.0918 0.0000 80.2420 12.1486 0.0000 T 1 C1 T F 0
356 00000092 336.3960 40.0210 296.3750 12.1248 0.0000 80.5998 12.5064 0.0000 T 1 C1 T F 0
357 00000406 336.6280 40.2422 296.3858 12.1357 0.0000 80.8474 12.7540 0.0000 T 1 C1 T F 0
358 00000142 336.2155 39.8202 296.3953 12.1451 0.0000 80.4341 12.3408 0.0000 T 1 C1 T F 0
359 00000178 336.4659 40.0560 296.4099 12.1598 0.0000 80.7298 12.6364 0.0000 T 1 C1 T F 0
360 00000013 336.3174 39.8949 296.4226 12.1724 0.0000 80.5575 12.4641 0.0000 T 1 C1 T F 0
361 00000170 336.2932 39.8589 296.4343 12.1842 0.0000 80.5772 12.4838 0.0000 T 1 C1 T F 0
362 00000420 335.9314 39.3716 296.5598 12.3096 0.0000 80.1206 12.0272 0.0000 T 1 C1 T F 0
363 00000137 336.3874 39.7847 296.6027 12.3526 0.0000 80.6482 12.5548 0.0000 T 1 C1 T F 0
364 00000160 336.5044 39.8964 296.6080 12.3579 0.0000 80.7277 12.6343 0.0000 T 1 C1 T F 0
365 00000436 336.8431 40.1957 296.6474 12.3973 0.0000 81.2014 13.1080 0.0000 T 1 C1 T F 0
366 00000041 336.1095 39.4561 296.6534 12.4032 0.0000 80.2799 12.1865 0.0000 T 1 C1 T F 0
367 00000188 336.5276 39.8307 296.6969 12.4467 0.0000 80.7966 12.7032 0.0000 T 1 C1 T F 0
368 00000249 336.8611 40.0524 296.8087 12.5586 0.0000 81.1830 13.0896 0.0000 T 1 C1 T F 0
369 00000224 336.7972 39.8989 296.8983 12.6482 0.0000 81.0781 12.9847 0.0000 T 1 C1 T F 0
370 00000237 337.0633 40.1461 296.9172 12.6670 0.0000 81.3409 13.2475 0.0000 T 1 C1 T F 0
371 00000438 337.4205 40.4686 296.9519 12.7018 0.0000 81.7686 13.6752 0.0000 T 1 C1 T F 0
372 00000376 337.0660 40.1086 296.9574 12.7072 0.0000 81.4417 13.3483 0.0000 T 1 C1 T F 0
373 00000211 336.8505 39.8802 296.9703 12.7202 0.0000 81.0538 12.9604 0.0000 T 1 C1 T F 0
374 00000335 337.0487 40.0460 297.0027 12.7526 0.0000 81.4303 13.3369 0.0000 T 1 C1 T F 0
375 00000261 337.0276 39.9713 297.0563 12.8061 0.0000 81.3161 13.2227 0.0000 T 1 C1 T F 0
376 00000241 336.7014 39.5963 297.1051 12.8550 0.0000 80.8649 12.7715 0.0000 T 1 C1 T F 0
377 00000368 337.2385 40.1199 297.1186 12.8685 0.0000 81.6187 13.5253 0.0000 T 1 C1 T F 0
378 00000378 336.9563 39.8324 297.1239 12.8738 0.0000 81.2525 13.1591 0.0000 T 1 C1 T F 0
379 00000206 336.7187 39.5921 297.1266 12.8764 0.0000 80.8740 12.7806 0.0000 T 1 C1 T F 0
380 00000423 337.1726 39.9824 297.1903 12.9401 0.0000 81.5337 13.4404 0.0000 T 1 C1 T F 0
381 00000357 337.3014 40.0035 297.2979 13.0477 0.0000 81.5955 13.5022 0.0000 T 1 C1 T F 0
382 00000437 337.0368 39.7185 297.3183 13.0682 0.0000 81.3082 13.2149 0.0000 T 1 C1 T F 0
383 00000216 337.1589 39.8360 297.3229 13.0728 0.0000 81.3518 13.2584 0.0000 T 1 C1 T F 0
384 00000251 337.4750 40.1149 297.3601 13.1099 0.0000 81.6247 13.5313 0.0000 T 1 C1 T F 0
385 00000441 337.3628 40.0001 297.3628 13.1126 0.0000 81.7429 13.6495 0.0000 T 1 C1 T F 0
386 00000288 337.2165 39.8464 297.3701 13.1199 0.0000 81.4170 13.3236 0.0000 T 1 C1 T F 0
387 00000351 337.4231 40.0295 297.3936 13.1435 0.0000 81.7423 13.6490 0.0000 T 1 C1 T F 0
388 00000278 337.2860 39.8696 297.4164 13.1663 0.0000 81.5395 13.4461 0.0000 T 1 C1 T F 0
389 00000203 337.0653 39.6309 297.4344 13.1843 0.0000 81.1499 13.0565 0.0000 T 1 C1 T F 0
390 00000442 337.4520 40.0160 297.4360 13.1859 0.0000 81.8184 13.7250 0.0000 T 1 C1 T F 0
391 00000434 337.5017 39.9157 297.5860 13.3358 0.0000 81.7843 13.6909 0.0000 T 1 C1 T F 0
392 00000271 336.9851 39.3910 297.5941 13.3440 0.0000 81.0762 12.9828 0.0000 T 1 C1 T F 0
393 00000305 337.6429 40.0244 297.6184 13.3683 0.0000 81.9923 13.8989 0.0000 T 1 C1 T F 0
394 00000440 337.5959 39.9317 297.6642 13.4141 0.0000 81.8996 13.8062 0.0000 T 1 C1 T F 0
395 00000298 337.6886 39.9981 297.6905 13.4403 0.0000 81.9492 13.8558 0.0000 T 1 C1 T F 0
396 00000380 337.7600 40.0280 297.7320 13.4819 0.0000 82.1017 14.0083 0.0000 T 1 C1 T F 0
397 00000403 337.4222 39.6890 297.7333 13.4831 0.0000 81.6590 13.5656 0.0000 T 1 C1 T F 0
398 00000301 337.8071 40.0568 297.7502 13.5001 0.0000 82.1065 14.0131 0.0000 T 1 C1 T F 0
399 00000384 337.8441 40.0541 297.7900 13.5398 0.0000 82.2097 14.1163 0.0000 T 1 C1 T F 0
400 00000401 337.7688 39.9742 297.7947 13.5445 0.0000 82.1105 14.0172 0.0000 T 1 C1 T F 0
401 00000327 337.9760 40.1685 297.8075 13.5574 0.0000 82.3057 14.2123 0.0000 T 1 C1 T F 0
402 00000394 337.9074 40.0670 297.8405 13.5903 0.0000 82.2141 14.1207 0.0000 T 1 C1 T F 0
403 00000320 337.7397 39.8488 297.8909 13.6407 0.0000 82.0166 13.9232 0.0000 T 1 C1 T F 0
404 00000408 338.0705 40.1656 297.9049 13.6548 0.0000 82.3528 14.2594 0.0000 T 1 C1 T F 0
405 00000333 338.1418 40.2109 297.9309 13.6807 0.0000 82.5078 14.4144 0.0000 T 1 C1 T F 0
406 00000311 338.0190 40.0390 297.9801 13.7299 0.0000 82.2929 14.1995 0.0000 T 1 C1 T F 0
407 00000429 338.0432 40.0618 297.9814 13.7313 0.0000 82.3151 14.2218 0.0000 T 1 C1 T F 0
408 00000433 337.6144 39.6022 298.0122 13.7620 0.0000 81.8412 13.7478 0.0000 T 1 C1 T F 0
409 00000387 338.0177 40.0023 298.0153 13.7652 0.0000 82.2890 14.1956 0.0000 T 1 C1 T F 0
410 00000354 338.1927 40.1575 298.0352 13.7851 0.0000 82.4735 14.3801 0.0000 T 1 C1 T F 0
411 00000432 338.0507 39.9611 298.0897 13.8395 0.0000 82.3900 14.2966 0.0000 T 1 C1 T F 0
412 00000412 338.0015 39.9066 298.0950 13.8448 0.0000 82.3328 14.2394 0.0000 T 1 C1 T F 0
413 00000405 338.0834 39.9687 298.1147 13.8646 0.0000 82.3559 14.2626 0.0000 T 1 C1 T F 0
414 00000389 337.5830 39.4600 298.1230 13.8729 0.0000 81.7452 13.6518 0.0000 T 1 C1 T F 0
415 00000370 337.8473 39.7107 298.1367 13.8865 0.0000 82.0052 13.9118 0.0000 T 1 C1 T F 0
416 00000435 338.1404 39.9922 298.1482 13.8981 0.0000 82.4327 14.3393 0.0000 T 1 C1 T F 0
417 00000443 338.1185 39.9699 298.1487 13.8985 0.0000 82.4736 14.3802 0.0000 T 1 C1 T F 0
418 00000396 337.9517 39.8017 298.1500 13.8999 0.0000 82.2571 14.1637 0.0000 T 1 C1 T F 0
419 00000410 338.4002 40.2334 298.1668 13.9167 0.0000 82.7643 14.6710 0.0000 T 1 C1 T F 0
420 00000339 338.2718 40.0815 298.1903 13.9401 0.0000 82.6193 14.5260 0.0000 T 1 C1 T F 0
421 00000342 338.3398 40.0768 298.2630 14.0129 0.0000 82.6633 14.5699 0.0000 T 1 C1 T F 0
422 00000428 338.3196 40.0500 298.2696 14.0195 0.0000 82.5880 14.4946 0.0000 T 1 C1 T F 0
423 00000439 338.7007 40.4310 298.2697 14.0196 0.0000 83.0886 14.9953 0.0000 T 1 C1 T F 0
424 00000411 338.2799 39.9275 298.3524 14.1022 0.0000 82.5448 14.4515 0.0000 T 1 C1 T F 0
425 00000427 338.0215 39.6255 298.3960 14.1459 0.0000 82.1709 14.0775 0.0000 T 1 C1 T F 0
426 00000345 338.4270 40.0308 298.3962 14.1460 0.0000 82.6831 14.5897 0.0000 T 1 C1 T F 0
427 00000414 338.8155 40.4071 298.4084 14.1583 0.0000 83.1993 15.1059 0.0000 T 1 C1 T F 0
428 00000360 338.2942 39.8792 298.4150 14.1648 0.0000 82.5997 14.5063 0.0000 T 1 C1 T F 0
429 00000444 338.5604 40.1337 298.4267 14.1766 0.0000 82.9119 14.8185 0.0000 T 1 C1 T F 0
430 00000426 337.8703 39.3962 298.4742 14.2240 0.0000 82.0252 13.9318 0.0000 T 1 C1 T F 0
431 00000413 338.2157 39.7192 298.4965 14.2463 0.0000 82.5133 14.4199 0.0000 T 1 C1 T F 0
432 00000363 338.2366 39.7270 298.5096 14.2595 0.0000 82.4500 14.3566 0.0000 T 1 C1 T F 0
433 00000373 338.8709 40.3144 298.5565 14.3064 0.0000 83.1490 15.0556 0.0000 T 1 C1 T F 0
434 00000366 338.5867 39.9967 298.5900 14.3398 0.0000 82.8983 14.8050 0.0000 T 1 C1 T F 0
435 00000348 338.2288 39.4862 298.7426 14.4924 0.0000 82.3644 14.2710 0.0000 T 1 C1 T F 0
436 00000382 338.6923 39.9248 298.7675 14.5173 0.0000 82.9407 14.8473 0.0000 T 1 C1 T F 0
437 00000330 338.5783 39.7564 298.8219 14.5717 0.0000 82.7069 14.6135 0.0000 T 1 C1 T F 0
438 00000430 339.0796 40.1532 298.9265 14.6764 0.0000 83.4122 15.3188 0.0000 T 1 C1 T F 0
439 00000392 338.7309 39.7632 298.9677 14.7176 0.0000 82.9344 14.8410 0.0000 T 1 C1 T F 0
440 00000399 339.1597 40.1906 298.9691 14.7190 0.0000 83.4774 15.3840 0.0000 T 1 C1 T F 0
441 00000422 338.8711 39.7045 299.1665 14.9164 0.0000 83.0699 14.9765 0.0000 T 1 C1 T F 0
442 00000431 339.0994 39.6191 299.4802 15.2301 0.0000 83.2903 15.1969 0.0000 T 1 C1 T F 0
443 00000418 343.5817 41.5223 302.0594 17.8093 0.0000 88.1954 20.1020 0.0000 T 1 C1 F F 0
444 00000419 343.8502 41.2032 302.6470 18.3968 0.0000 88.3933 20.2999 0.0000 T 1 C1 F F 0
----------------------------------------------------------------------------------------------------------------------------------------
========================================================================================================================================
